# Supplementary material for: Targeting lactate dehydrogenase B-dependent mitochondrial metabolism affects tumor initiating cells and inhibits tumorigenesis of non-small cell lung cancer by inducing mtDNA damage
Source: Cell Mol Life Sci. 2022 Jul 25;79(8):445. doi: 10.1007/s00018-022-04453-5 (PMC9314287; doi:10.1007/s00018-022-04453-5)
Supplement: Supplementary file 3 — Supplementary file3 (XLSX 110 KB) [file 18_2022_4453_MOESM3_ESM.xlsx]

## Sheet: Sheet1
ionIdx	ionMz	Top annotation name	01 / EXTRA water	02 / EXTRA water	03 / EXTRA water	04 / EXTRA water	05 / EXTRA water	06 / EXTRA water	07 / EXTRA water	08 / EXTRA water	09 / EXTRA water	10 / EXTRA water	11 / A549 | ctr | 17glc | cells	12 / A549 | ctr | 17glc | cells	13 / A549 | ctr | 17glc | cells	14 / A549 | ctr | 17glc | cells	15 / A549 | ctr | 17glc | cells	16 / A549 | ctr | 17glc | cells	17 / A549 | kd | 17glc | cells	18 / A549 | kd | 17glc | cells	19 / A549 | kd | 17glc | cells	20 / A549 | kd | 17glc | cells	21 / A549 | kd | 17glc | cells	22 / A549 | kd | 17glc | cells	23 / H358 | ctr | 17glc | cells	24 / H358 | ctr | 17glc | cells	25 / H358 | ctr | 17glc | cells	26 / H358 | ctr | 17glc | cells	27 / H358 | ctr | 17glc | cells	28 / H358 | ctr | 17glc | cells	29 / H358 | kd | 17glc | cells	30 / H358 | kd | 17glc | cells	31 / H358 | kd | 17glc | cells	32 / H358 | kd | 17glc | cells	33 / H358 | kd | 17glc | cells	34 / H358 | kd | 17glc | cells	35 / EXTRA water	36 / EXTRA water	37 / EXTRA water	38 / EXTRA water	39 / EXTRA water	40 / EXTRA water	41 / EXTRA water	42 / EXTRA water
1	59.0139	Acetatic acid	37843	38448	50365	39872	57413	44598	47366	45974	56190	46695	2395543	2475505	2734583	2812085	1724221	1716705	2467066	2512548	2728831	2833085	2086960	2140842	1393007	1363286	1542270	1548138	1401666	1392085	1950982	2007158	2079082	2095510	1417590	1440407	59170	57834	56244	54210	105091	87477	77046	68204
2	61.0294	Ethylene glycol	1819	1090	2413	2462	3144	2895	3111	1887	2049	2566	2167	1338	1828	1864	2030	2159	1888	1901	2590	3010	1872	1782	2131	1919	2121	2681	2307	2511	2663	2119	2171	1851	2312	1638	2310	2223	1708	2579	3328	2635	2861	2558
3	71.014	Propenoic acid C3:1	6550	7147	10784	6927	14184	7009	10721	9367	14218	9562	99093	94316	79027	85686	96184	94206	90050	92417	101621	108046	86297	80667	50866	52009	46246	47436	45916	44993	53299	53447	47901	46419	40189	43136	17288	12563	16153	13185	43393	31871	24058	21584
4	72.9932	Glyoxylic acid	1753	1621	937	1859	1595	1517	1257	1681	986	1116	2244	2114	1708	2349	2192	1991	2171	2228	2448	1972	2747	1847	2824	3165	3078	3147	2157	3166	2429	2175	2329	2324	2525	2991	1633	1702	1525	1670	1719	2171	1878	1566
5	73.0297	C3:0 (Propionic acid)	4887	5017	4752	4202	5186	5882	4658	4730	5145	5169	14551	12616	13594	13584	13240	14854	12405	11392	13687	12440	15175	13020	8459	9652	7690	9564	7408	7078	9543	9340	10048	9884	8702	9360	6079	5033	5897	5545	10057	10691	9191	8304
6	74.0248	Propenoic acid C3:1; Glycine	795	638	447	743	786	1438	413	550	1417	1135	29950	26143	26343	26222	34329	29438	14460	15101	17155	18404	22540	24179	47723	43309	44684	44887	40643	39486	28725	33165	32865	36175	33303	31943	3965	3134	1583	1513	19089	16258	5539	5580
7	75.0088	Glycolate	1262	1307	1135	1363	1067	1079	1553	1596	1441	1184	10769	10914	15113	15937	10846	11972	15492	14114	14661	16356	11948	13376	8571	7827	12417	10252	12158	12788	9969	11671	11621	10551	10464	10178	1141	630	1283	1907	2780	2028	2600	2361
8	80.9651	Sulfurous acid	9056	7749	7334	9378	7551	8564	7948	8364	7541	8429	9561	8606	8374	9638	8613	8535	10396	10052	10297	10477	10207	9149	9091	9679	8936	10632	10915	8922	9102	10284	10729	10365	10697	9173	8268	8161	8065	7574	8070	9072	8632	8262
9	86.0248	Dehydroalanine	2169	2094	2162	1533	1512	1606	1977	1941	1572	1987	17728	17025	18793	17826	20206	20245	8691	8017	12394	10779	14989	13871	14169	13806	16843	15157	15424	14047	10416	12128	12615	11549	11713	14335	3851	3469	2783	2804	9710	7817	4724	4080
10	87.0087	Pyruvate	33343	32268	31042	29474	30070	29718	28925	29728	30976	28101	59896	60014	48414	52823	57413	58507	56481	54037	62733	63600	52944	54972	82362	85109	84308	87503	72020	74917	68366	66782	61292	62910	59134	58555	35349	35467	31816	31206	60432	52402	44594	43893
11	87.0451	C4:0 (Butyric acid)	5938	7400	5873	5076	4579	5662	5235	6016	5943	6116	10737	10635	11650	11140	11289	9388	10641	10398	9242	10638	10292	9647	21075	22028	19145	20253	19025	17104	11519	13705	14271	14000	14266	13004	5760	4857	4954	5144	9329	7148	7194	6125
12	88.0404	Alanine	24832	27398	25795	26629	26239	23268	23839	26891	26637	23824	143333	136091	143284	145019	157245	154408	113870	111263	128714	115058	168575	163450	918335	908368	894014	892139	746959	750303	562799	568306	669730	655712	628442	638823	54815	44947	37679	35997	311775	222957	120285	110872
13	89.0246	Lactate	107977	110108	131007	114936	145813	114865	128178	119880	142463	126223	1529616	1530753	1339892	1340242	1599943	1582034	1115826	1086962	1294283	1262310	1288935	1271465	3691500	3714425	3618646	3623306	3111939	3168197	2774208	2809755	2674745	2623193	2269574	2305678	354291	252717	217076	185968	1799830	1376850	852508	780673
14	91.0401	Glycerol	9443	10739	10607	11388	12072	11083	9488	10251	12401	11469	12199	13120	10905	11070	10720	9482	10591	10779	10650	10884	10449	10063	12214	12161	11887	15915	13569	12836	12134	13260	11820	11542	14720	14602	11570	12179	12753	13522	25244	22455	17970	18665
15	96.9693	Phosphoric acid	160865	194560	154047	186368	160922	181589	149521	174561	170435	187458	268554	248466	277624	263599	300674	272485	227124	212178	223203	202538	259671	236915	525180	497085	532398	532396	484376	471065	452005	434074	453863	427405	453628	431695	302968	337680	230089	262753	640141	678385	314565	358866
16	99.045	Valerolactone	5065	6179	4972	6221	4902	6135	5629	5032	4900	6611	6487	5896	5336	4829	6582	5534	6024	6830	7397	6262	6608	5676	8983	9386	9539	7738	8584	8761	8123	7189	7301	8026	7034	6562	7122	5265	7106	5530	7795	7237	6859	7467
17	101.025	Oxobutanoic acid	14749	15386	16814	13476	20855	13729	17031	17382	18774	17358	88079	95295	81003	80244	90600	88499	91410	90138	100058	100228	81822	79607	47236	54287	54488	50800	50187	51027	58036	60151	55210	51501	50358	48510	24877	24316	24061	22245	47722	40230	33511	33007
18	102.056	Valerolactone; Aminobutanoic acid (ABA)	44918	43534	40106	44816	43951	42222	40751	43503	40869	43141	109436	118447	112166	109808	113860	125805	81896	88079	88452	86204	115248	117856	194271	195775	192505	190315	183718	185814	134026	133489	155359	153943	147013	153357	43694	45004	44565	41899	53632	51299	46759	50052
19	103.004	Hydroxypyruvate	28292	26933	33266	33331	28447	32173	31512	33989	29968	26707	7646	9075	10777	8975	8598	9347	9162	8989	9440	8596	10202	10971	8468	6216	6953	7043	8736	6919	10256	7542	7503	7424	7215	9041	25467	25816	28841	28567	11307	11194	17587	18550
20	103.04	Hydroxybutanoic acid	311849	293282	294959	289577	292459	289147	292972	301070	285734	291646	241710	236796	292907	290617	301082	311197	290011	312494	280852	285008	257347	270284	227379	242083	253139	255124	258026	269218	232876	234589	247804	239380	259450	246916	313928	298163	302383	284773	257350	262171	267957	268322
21	104.035	Serine	3758	2533	3254	3931	3496	3460	3180	3739	2392	2713	64778	61020	57020	58500	68128	65777	33050	34104	39388	40937	49333	42454	79924	75018	77060	76638	72586	67239	67476	65354	79186	69542	75890	72755	13764	12128	7137	5951	42591	37459	14549	14800
22	105.019	D-Glyceric acid	5743	5120	5210	3950	4408	4936	5290	5276	4324	4964	3899	4073	3527	2986	4663	3577	4899	4606	3890	2926	4084	4645	3732	4024	4463	6006	4532	5199	4522	3014	4612	4513	4012	4228	5664	5599	4699	4648	3959	5828	4679	5624
23	108.013	Hypotaurine	465	527	273	658	626	457	168	438	515	389	45300	45610	44659	46247	51191	48282	51211	50855	49303	44968	71914	70304	71686	75970	73092	71629	65412	64561	42120	38780	51161	48625	49205	53174	1213	1026	614	677	14560	8586	3812	3421
24	109.03	Catechol	3276	3423	3871	3805	4020	3384	4358	4179	5173	4137	3177	3298	2823	2659	3521	2859	3353	3000	2397	3056	3152	3028	3222	1348	2723	2212	3353	3058	2632	2699	2797	3204	3562	2420	3551	2458	3146	3862	3144	3623	4154	3893
25	109.041	N-Acetylimidazole	2009	3491	2874	3138	3363	2282	2727	2936	3038	2263	7607	6795	5534	5861	5654	6120	4456	5220	5722	5061	4429	5218	8608	9600	9495	11100	7357	7813	6068	7185	8469	7436	7907	7133	3657	3928	2582	2570	4989	5065	4335	4421
26	110.072	Histamine	1149	1166	1027	595	570	851	492	722	625	570	1672	2436	1518	1530	1600	1872	847	800	1373	1938	1768	1518	2494	1916	1638	1422	2312	2246	2482	1387	1400	1217	1878	1334	1125	768	474	746	8627	7497	4609	4372
27	111.02	Uracil	7917	8165	6329	6420	6584	6027	6855	5561	7898	7777	8386	8940	9048	8766	9172	10685	8132	6450	7185	10227	10673	9175	14061	15741	16920	16400	16237	16697	13327	12088	14008	13933	14642	14426	9652	7982	8225	9483	32616	23979	20643	16345
28	112.04	Catechol; Pyrroline carboxylic acid	3846	3982	4338	3562	4155	3318	3786	4015	2235	2145	13923	15981	12741	13751	13884	12430	9586	8668	11056	11598	9620	10170	13878	11860	12318	13960	13597	13773	7484	9003	8394	9128	9736	8838	4658	3313	4085	4029	7267	6022	5158	4922
29	113.036	Dihydrouracil	3873	4357	3205	3848	4685	4453	3706	4601	3923	4789	9224	8428	8509	7786	9443	8686	7176	7409	8042	7074	7877	7717	28458	28305	29842	26325	23309	24267	20794	21325	21076	21822	22785	21585	6338	5900	4839	4817	8027	7176	5807	5278
30	114.056	Proline	11264	13563	15015	11234	12649	11451	11971	10645	12585	12735	137616	134962	135170	136596	149208	147228	80576	78263	82544	79502	103559	106847	521681	508970	499510	502084	437226	431803	384584	396301	465935	467290	445840	445885	27732	24235	20351	18920	88092	67191	42994	38915
31	115.004	Fumarate	9175	9090	8793	8153	9885	8529	9991	8320	10040	10158	31046	26807	28496	26781	34794	31316	25101	23909	21897	17641	28240	27807	87189	86948	93564	97866	84836	87997	60608	60003	65837	66852	66733	70437	20435	19573	12076	14527	43907	37916	23599	26145
32	115.04	Ketovaline	13416	13237	15043	14028	15073	14038	14383	14599	15589	14270	12102	11844	14343	12985	12065	11980	12347	12125	15629	13428	13560	13637	16210	15209	14850	16320	18350	16495	14258	14698	13297	13089	15018	13625	14479	15269	15494	14041	17048	16555	14461	14308
33	115.05	Catechol; Pyrroline carboxylic acid; Diacetylhydrazine	1413	1289	1419	1176	1410	1360	1301	1439	1264	1319	1077	1345	1622	1535	1556	1627	1428	1300	1870	1277	1251	1636	2738	2611	3909	2365	2234	2221	2062	1612	1710	1744	2104	2095	1528	2303	1322	1212	1677	1693	1496	1444
34	116.035	Aspartate semialdehyde	2794	2335	2838	1803	1683	1546	1558	1820	1898	2040	4446	5871	5165	4518	6487	7268	4598	2641	4770	3940	5605	6264	7194	8871	8816	8003	7301	7481	5705	5870	6317	6213	7586	6657	3541	2546	2118	2059	4873	5566	3933	2660
35	116.047	Dihydrouracil; Guanidinoacetic acid	187	344	530	434	276	354	246	337	288	418	770	398	694	610	528	518	733	308	528	599	571	816	2057	2211	1733	2019	1442	2304	1370	1033	2164	1323	1700	1765	337	376	203	345	3277	1482	1348	696
36	116.072	Valine; Betaine	11263	10526	11015	10818	11151	11018	10750	10647	11500	11984	125011	125637	116323	117956	130721	135551	65238	64462	82762	76066	85554	86124	123501	117592	114074	114786	113085	111748	97314	93004	104186	105775	95588	92908	28439	23552	19264	18040	106496	77174	50284	50414
37	117.019	Succinate	36375	39530	32479	36149	35353	31202	30507	33080	32378	34024	125490	122077	119016	127042	126744	127597	77925	74007	71997	70050	92315	99692	56062	55024	47334	42080	47385	47405	43935	41311	41467	36250	46284	46764	38213	28603	28430	27545	99060	88502	61715	57007
38	118.051	Ketovaline; Threonine	3856	2999	3794	3059	3073	3500	2328	2158	3311	2166	202162	195600	186399	175217	223226	223411	81313	79081	98423	91079	122290	123182	122534	120182	114474	120894	110776	98952	68919	73756	85638	81568	81478	77342	14553	11929	7743	6514	76997	57043	22868	22513
39	119.035	Purine	126251	124817	126928	123058	130524	118635	126409	129005	130286	125522	157695	155444	127709	132257	142222	139764	147953	153705	155708	155653	122371	125742	97699	103706	94265	86728	90292	87454	108197	107051	95224	97109	89066	93377	103413	99650	99645	100220	101374	105457	102136	100025
40	119.05	Phenylacetaldehyde	4195	3849	4881	4768	4772	4528	4787	3789	4249	4628	9869	8475	8633	9040	7087	7794	7066	7159	7274	7468	8102	7285	6845	6853	6967	4935	6419	7479	6055	5852	6449	5419	5814	5583	4029	3899	3555	4556	5682	5329	4232	3862
41	120.013	Cys	2150	1956	2676	2284	2720	2875	2474	2588	3105	2566	4672	3966	4254	3701	3303	4289	2775	2866	3929	3781	3121	3445	4681	3951	2818	3986	3451	3150	3488	3471	2931	2783	3239	3638	3170	2682	2809	2522	3887	2777	2564	1930
42	120.996	3-Mercaptolactate	896	741	865	943	825	863	957	876	521	688	11760	12345	11647	12823	15555	14164	11512	8304	11432	9912	17590	15229	14806	18929	18757	16496	19558	19289	12654	12483	15440	14869	16941	15346	1441	1356	1831	1703	1989	1306	1728	1883
43	121.029	Benzoate	10584	11009	11243	11608	11120	11776	11644	10677	12135	14021	27370	23299	22719	25092	23315	25597	26737	25404	24664	26386	26976	30394	24736	22855	21372	22038	23239	22830	24378	23879	36284	32968	24468	23336	15054	14413	13450	12237	15062	16200	12960	13521
44	121.041	Nicotinamide	7111	6735	7238	6662	7398	6194	7087	6419	6670	5921	16574	13170	18973	18910	18404	19590	14956	16132	19380	20074	16884	16717	20096	19382	22567	23716	25003	25903	21273	21691	20918	18605	21015	20534	19948	15890	16642	16338	49862	41730	36725	34203
45	122.025	Nicotinate	3972	2439	2688	2020	2271	1987	2210	4327	2789	3046	2254	1830	2020	2419	2364	2627	2121	2097	1948	1838	3166	1986	1618	2588	2282	2268	2379	2500	2712	2555	2527	2818	3340	2519	3450	3003	2769	3312	4173	4972	5382	3477
46	124.008	Taurine	3621	3700	4684	3937	4872	3718	4413	3404	4744	3686	946900	947981	889977	913834	984960	993132	1110083	1109254	1103222	1095249	1589738	1620726	1838224	1832300	1806600	1779962	1686048	1679238	1063616	1092153	1325396	1286610	1278094	1295635	20728	13809	12794	11317	912495	590395	220660	191043
47	125.047	5-Amino-4-imidazolecarboxyamide	1501	1261	1503	1514	1366	1004	1163	825	1008	831	1861	1626	1840	1671	2146	2472	2256	2316	1852	2212	2225	1860	2157	1783	2325	1863	2080	1861	2149	2091	2248	1945	2426	2407	6785	7199	4165	4236	7544	6228	5919	6365
48	128.035	Oxoproline	14576	14506	17560	16965	19681	14595	16103	13648	17583	16171	203853	202240	177203	188872	206211	207491	148327	147386	162366	158994	165822	166051	321089	320258	328546	316174	290905	295429	229435	239899	246655	249857	234693	248792	39085	27700	25243	23750	52540	40690	32834	31617
49	128.072	Pipecolate	1943	1456	1056	1333	1369	1328	1593	1239	1271	1513	2692	2295	2354	2290	3437	2383	2475	2784	2335	2254	2374	2586	2720	2983	2342	2733	2016	2509	2238	2538	2219	2542	2330	2637	1405	1862	1311	1957	4143	3693	3391	2898
50	129.019	Itaconate	8233	7756	9107	6761	8642	8025	9970	8757	8820	8471	12113	13049	11978	12663	14474	14010	14553	13644	14558	13326	12304	15748	16462	17189	17679	20082	17999	17968	12040	12388	13323	12391	13046	13707	10317	9891	9141	8216	27256	25592	15884	16849
51	129.056	4-Methyl-2-oxopentanoate	12963	13587	13632	10524	13148	12842	12572	12018	12363	11590	78035	76981	74450	74147	68096	70946	50103	49045	68107	65376	55082	55275	109572	110125	106957	101471	93186	93866	86241	87863	77318	79021	62751	67821	15699	17066	15576	13992	23896	18508	18363	17459
52	130.051	5-Aminolevulinic acid	2462	3229	3824	2740	3179	3523	3372	1944	3618	3649	61154	57121	67596	61660	76919	72141	37118	33789	41215	35874	48756	50407	232228	235290	226145	224826	197053	205345	140630	141465	166591	158534	158760	168610	11675	9931	5882	6128	36075	23806	13827	11268
53	130.062	Creatine	803	1403	1618	916	1284	931	1153	1303	1662	1316	11241	10493	10071	10804	15828	14779	9539	10317	10501	9874	13610	14145	18348	18516	18511	16462	16019	16192	13739	10719	12309	13104	12677	13354	1802	1643	1112	1570	114948	80889	25983	22321
54	130.087	(Iso)Leucine	18619	17818	21052	20608	22745	20363	21871	16958	21758	18797	829183	819649	734401	752215	901030	901511	402932	395431	459663	448173	518977	514427	869376	876130	834569	815092	741929	749421	620782	619036	690252	668503	661495	671360	72792	64011	52612	47611	172443	131753	86267	74082
55	131.046	Oxoproline; Asparagine	2869	5047	3651	3650	2871	3544	3410	3384	2796	3402	25580	25773	24961	23571	27466	24655	19917	16154	19351	16607	20196	17587	238408	229400	225891	226181	192487	185129	140707	141836	160224	157667	154321	155075	14118	13299	6607	4806	14932	12361	6589	7108
56	131.083	Ornithine	13630	11574	10514	9948	10089	9262	9040	8904	8674	7511	43631	39482	38234	37971	42228	44276	28586	31432	37938	37323	40728	37954	52243	55332	61252	61255	48575	53645	66837	70587	60568	52785	58802	49471	33548	33644	20132	20847	63642	62295	36368	33690
57	132.03	Aspartate	4354	4835	4496	4573	3899	4615	4823	4422	3319	3379	116700	115666	110976	108709	118479	119986	92362	89514	97250	94174	153060	157696	256711	251004	234483	238838	219599	227084	163038	164242	175457	184289	197648	205474	14043	11307	7904	6077	47423	38235	18182	16997
58	133.014	Malate	21361	24825	20223	22584	21255	21418	19763	19702	19229	19262	152150	140629	121489	121501	183087	165947	90569	79611	79983	78855	107310	114044	547377	560026	580861	600028	522430	556310	320727	329964	390187	376347	402196	409433	110100	113902	64067	70529	95818	98980	71820	70632
59	133.051	Deoxyribose	6746	6829	8131	7139	10585	7909	8415	7111	8957	8331	5570	4333	4477	3952	6766	3860	7238	8307	5277	3946	3954	4429	9307	7488	8361	9539	7733	7134	7076	6792	8594	6922	10233	7941	10840	9630	10765	7880	10873	10291	11332	10351
60	134.047	Adenine	43910	40245	37038	34494	33685	29559	29339	30177	28510	26778	74480	70486	70833	70175	85585	91373	71561	65249	69950	65912	74457	73053	110700	103752	110267	116126	113599	115419	88168	87775	97515	87988	105580	93876	73441	63908	54243	54804	160806	134555	100920	90184
61	135.045	Phenyl acetate	11043	10607	15141	12657	15876	12286	14954	14906	15253	13860	20009	21309	20714	22403	18221	16732	16991	16865	18782	18878	19168	18692	24504	20272	16241	16958	24757	23116	16840	19932	19394	18647	20974	20263	17086	18264	19451	20178	23711	25161	21649	23729
62	136.041	Anthranilate	1702	1275	1662	800	1248	1533	1320	1153	1096	1005	2094	2324	3238	2532	2627	1798	2287	1688	1854	2143	3592	2092	3502	2159	3119	3506	3117	3715	2594	2244	1740	2739	2081	2286	2110	1768	1553	1165	2424	2586	1761	2321
63	137.024	4-Hydroxybenzoate	8374	10093	9083	8767	8806	9205	9079	8521	9941	10664	6235	6562	10323	8749	8430	8637	122255	130189	10750	10114	9471	8734	10334	11587	14094	11847	8952	9871	13431	11218	8587	8848	17947	17312	9746	9927	8770	11159	9629	10164	10945	10462
64	137.035	Urocanate	15160	14845	15587	14839	16909	14060	14894	15640	15871	14285	12672	9890	11161	11112	11657	11310	16640	15829	10650	10957	13194	11817	10718	10761	10247	11347	10790	10267	9765	9615	9428	10603	12529	10968	29981	17378	20484	17245	20556	21405	18760	18969
65	139.051	Anthranilate; Methylimidazoleacetic acid	5410	4609	4540	4370	4376	5377	4661	5130	4406	4883	4588	3666	3485	3930	3756	4298	4588	4633	3543	3934	3561	2997	4348	4189	3845	4312	4029	4308	4518	4040	3539	4386	5187	3739	4431	4463	4578	4636	5860	5478	6136	5165
66	140.012	Ethanolamine phosphate	2936	3402	2167	2706	2404	2487	2492	2474	2304	1745	5946	6191	6621	6623	7215	6788	8864	7282	11072	9630	9619	10318	5510	5280	5356	6021	11718	9629	10035	9570	9967	9195	8800	8336	6144	6829	4560	5506	202327	190663	79640	85949
67	141.091	Cycloheptanecarboxylic acid	1552	2085	1298	2167	1922	1833	1644	1012	1299	1484	3225	4169	4152	3163	4035	4094	4315	3726	5303	4268	4448	4584	4104	3162	2647	2108	3118	2956	2589	2697	3498	2627	4004	3353	1447	1863	1521	1378	2357	1908	2127	1850
68	143.108	Octanoic acid	9193	8655	10170	8446	8677	9855	10462	8388	9268	10110	36787	31450	40784	39805	33489	34100	38940	39722	47623	47025	44646	48822	32233	30204	27615	26286	28957	30304	31099	31329	31619	34216	35253	35973	11141	10100	10861	8927	10321	10779	12088	11899
69	144.03	2-Oxoglutaramate	775	280	913	737	1652	616	809	912	1009	654	2033	2212	1724	2618	2367	2509	2761	2317	2155	2268	2381	2076	7591	9459	6749	9046	5888	7076	4155	3686	4574	5485	4051	5416	1482	1568	1599	895	1797	1476	1156	1981
70	144.066	4-Acetamidobutanoate	1226	1688	2191	1673	1880	2365	1245	1699	1665	1414	7908	8628	5711	5455	7200	7041	5722	5290	6631	5419	7758	6162	9323	8680	8023	8396	7633	8035	7523	7997	7432	7494	5695	6403	2288	2600	2490	1577	4225	3511	2889	1819
71	145.014	Oxoglutarate	2166	2648	2235	2340	2921	2492	1794	2014	2239	2183	16230	12497	13080	12645	17560	17435	10069	8886	8186	9651	12663	12283	32844	33585	33451	31542	32189	32897	16491	17137	18161	19389	20870	19341	6623	5394	4507	2871	6562	4644	3943	3202
72	145.062	Glutamine	6708	6752	7528	6358	9002	7653	8234	6713	9311	9412	582804	576994	505386	499726	591517	585960	294117	296317	335638	319514	373869	370911	1072705	1038368	985308	989086	829623	847709	668899	689284	772920	749323	743351	737607	59526	45635	24762	21505	148325	103945	46796	44373
73	145.098	Lysine	9665	10678	8602	10117	7240	7517	7930	8712	7263	8488	95353	90615	79603	85202	94358	101220	66112	67900	90770	96533	83971	81969	48927	41523	52275	51498	69616	63282	59450	58224	49136	44203	50272	43296	50735	51066	31842	31159	254161	239659	123275	129679
74	146.046	Glutamate	21190	23378	23894	20131	23853	19240	21235	20930	20276	20996	1063281	1071090	1049222	1069373	1148005	1141933	732834	733896	730746	712630	1110775	1114370	2071036	2042666	1963570	2006923	1847610	1906070	1302209	1316998	1520686	1507154	1524510	1584284	77019	59266	41661	36093	205776	148294	81013	73263
75	147.03	Hydroxyglutarate	13399	14309	11872	12409	13032	13203	13859	14439	11885	13614	13462	11826	10501	11469	15136	12601	9707	7793	8120	8289	11164	10247	23638	22171	21525	24348	22882	23551	10974	12738	12272	12981	15247	15900	15354	13375	15040	12919	13227	12146	11449	12699
76	147.066	Mevalonate	19778	18709	13931	14685	13667	13374	14494	14249	14199	14121	9947	9805	8786	8925	11213	10044	7262	6838	7973	7468	7579	8709	16967	14332	15227	13921	15202	12503	11150	10295	12659	11964	12242	11714	17985	15275	13407	12796	16273	17258	15534	13481
77	148.044	2-Oxoglutaramate; Methionine	1060	1501	1439	1039	997	1299	968	1970	1085	993	64985	62766	59495	57108	68014	70115	32336	28504	34953	34544	41618	43670	76899	77408	77561	75280	67851	64119	51794	49059	61627	59913	57091	57165	6131	4640	2878	3321	24716	20114	9974	8093
78	149.046	Pentose	2004	2134	3231	2073	2770	1893	2452	2161	2485	3503	30566	31566	23183	23171	27439	25195	27315	27661	30379	27341	31953	27368	14052	13198	14604	13154	10984	10942	13706	13921	12996	13043	12237	11992	3611	3864	3552	2626	10977	8497	6103	5545
79	149.061	4-Coumaryl alcohol	3234	3562	3858	3474	2907	3762	4142	3575	3322	3702	28510	27782	28202	28762	21848	23710	26533	29213	31366	29036	32668	32947	24429	22966	17919	17118	21899	24027	25425	25825	21906	25519	27406	30423	4255	5501	3492	4571	10447	9241	7883	5691
80	151.026	2-Oxo-4-methylthiobutanoic acid; Xanthine	1476	1257	688	1128	1281	1113	1018	737	804	1298	5083	5195	3985	4298	4773	4269	4061	4084	3783	4582	4010	3774	8368	7177	7644	8615	6229	5245	7277	8098	6712	6237	5516	6423	1617	1092	814	1475	3388	3235	1740	2275
81	151.039	p-Hydroxyphenylacetic acid	2414	4159	4599	3463	4085	3048	2509	3759	2611	3737	5737	3832	4987	5455	5981	5462	4883	6241	5579	4720	5991	5810	3254	2784	2791	3115	3992	2592	3842	3016	4597	2542	3974	2486	2813	3762	2375	2636	4498	3784	4117	4325
82	151.051	5,6-Dihydroxyindole; N1-Methyl-2-pyridone-5-carboxamide	1328	1562	1034	783	1144	1040	1635	1122	1172	844	1713	1416	1447	1703	1768	2046	1797	1478	1983	1446	1635	2509	1620	1133	2111	1245	1738	1395	1583	1626	1437	2156	1875	1747	929	1722	1204	1001	2587	2638	2386	1923
83	151.061	L-Arabitol	474	836	845	461	722	615	934		657	621	14974	15022	12823	12999	14603	14539	8597	8309	7639	8360	13278	12724	13782	12893	13911	11737	12086	11325	10700	9436	9935	9913	10771	10708	2260	2122	949	1221	8223	5475	3071	3496
84	152.035	3-Hydroxyanthranilic acid	1596	1610	2429	1480	1720	1517	2110	1703	2365	1254	2784	2456	2463	2448	2263	3165	3025	2675	2398	2674	3358	2936	2936	2828	2573	3596	2742	2710	2895	3301	2655	3253	2786	4149	2006	2130	2165	1503	2822	2904	2947	2941
85	154.062	N1-Methyl-2-pyridone-5-carboxamide; Histidine; Pentose	5037	3714	3312	3506	3960	3649	3983	2389	2570	3650	104251	92406	75929	75734	99296	99004	47004	39193	53312	50685	60707	57200	105437	97112	94384	96626	91669	86004	60931	58112	68563	56127	63853	59789	20862	18172	10114	10918	159391	123141	40369	41145
86	154.975	Phosphoglycolic acid	1260	829	1740	1191	1816	1313	1565	2050	1186	1080	2882	1891	2967	3704	3032	3553	2185	3094	2501	2073	2321	3073	1736	2256	2852	2403	2067	2282	2387	2443	2017	2774	2396	2423	2043	1952	1114	2170	2836	2194	2762	3033
87	155.01	Orotate	2718	2167	4495	2720	5309	2692	3755	3037	4694	3949	4890	4299	4599	4385	5777	4132	5203	5249	6842	5460	3952	4103	2793	2464	3293	2704	2577	1933	2379	2673	3043	2420	3118	2388	3209	2976	5105	4389	1934	1896	3097	4202
88	155.046	3-Hydroxyanthranilic acid; 4-Imidazolone-5-propionic acid	757	641	537	616	626	709	675	730	670	731	6904	8056	6279	7986	8057	7984	4893	6233	7981	6728	8313	8761	4218	3762	3861	3709	4155	3017	1702	2282	2445	2230	3154	3044	1464	1293	923	1429	4498	2963	1653	1204
89	159.03	Oxoadipate	3469	3409	3047	3145	3693	3225	3570	2375	3013	3807	3181	3066	2976	3997	2950	3200	3053	3178	4099	3002	3299	3572	3736	3778	4708	4935	3602	3688	3251	3362	2337	3499	3699	3604	3042	3175	3735	3490	3601	2814	4396	3557
90	159.103	Propylhydroxypentanoic acid	2018	2015	2600	2802	2381	1825	2652	2089	2792	2403	3275	2805	2602	3793	3297	3028	2517	2803	3787	3476	3159	3100	4168	4318	4137	3622	3569	3380	4261	3351	4506	4598	4115	6241	3396	2699	2271	3430	2930	2221	2837	2477
91	160.062	Aminoadipate	1381	1067	1143	1703	1610	729	1006	1139	871	1096	9680	10626	12469	10274	10784	12241	7256	6801	9557	8329	12363	12249	29943	27253	27415	26046	20928	22432	10824	14133	15563	15265	13951	16569	1582	1707	927	1143	8465	6558	4315	3007
92	163.04	Coumarate	1527	1728	1127	1480	1303	1687	1539	1551	1491	1556	5920	4890	4827	5281	5820	5523	3137	3562	4539	4278	3270	4252	3607	3749	4302	4447	3579	3547	3907	2999	3545	2929	2970	3338	1878	2082	2385	1678	3809	3163	2377	2387
93	163.061	Deoxyhexose	4546	4781	3924	3612	4503	4091	4094	3609	4091	4970	5882	5192	6248	6258	4486	5312	6387	5855	4478	5376	5624	6137	7111	5702	7942	8062	5451	5940	6567	6510	5483	4368	9386	7539	3788	3145	3717	3712	27132	18818	10579	9131
94	164.036	Formylanthranilic acid	711	1172	1926	860	1659	1298	674	976	1443	1251	1692	1431	2039	1716	1485	1563	5415	6277	4948	3996	9613	8765	2986	2299	2275	2163	2211	2375	2716	1670	4308	2265	3677	2030	1985	1351	1174	1050	3403	2316	1600	1899
95	164.072	Phenylalanine	3735	3386	4986	3244	4701	4763	5145	4382	5909	4758	315138	302385	286748	281332	320632	339999	129656	140373	165000	161118	189982	190260	190465	180358	172172	175714	155459	156749	129817	123870	148513	145909	134080	140977	21160	16620	10349	9881	64645	45057	23854	21125
96	165.092	C10:3	768	501	835	928	1137	750	268	618	655	697	2899	2467	2072	2545	2612	2545	2822	2740	1867	2617	2415	2394	2111	1796	1870	1975	2500	1419	2443	2954	2371	2588	3002	2120	919	961	566	705	1555	1415	951	1098
97	166.05	Coumarate; Pyridoxal	1524	1055	1022	1706	976	1457	1290	906	711	1069	5479	4627	4859	3672	4423	4865	4196	3575	4620	4202	4446	5267	4648	5877	5780	5067	4890	5516	3556	3589	3706	4655	3765	5352	1349	1431	1544	1487	2706	2334	2210	2231
98	166.976	Phosphoenolpyruvate	6314	4300	4446	5381	5147	5310	5721	6244	4480	5563	2266	2961	2397	2496	3034	2607	1755	1612	2210	1609	3049	2363	2897	2136	3030	2868	2266	2425	2145	1869	3887	2092	2558	2451	3638	2365	2240	3071	906	745	1094	968
99	167.021	Urate	1308	985	1581	1235	1857	1001	1371	1398	1315	1233	2667	3851	3281	3393	3044	4449	3778	3723	4648	4657	3203	3193	5945	6459	6428	7421	6146	5469	5577	5927	4672	5819	8042	9946	1786	843	1371	1412	6905	4229	2406	3159
100	167.035	Homogentisate	3199	4132	3251	3296	3210	2880	2734	4037	2575	2740	4558	4243	4281	4106	4897	5295	4843	4588	4678	4198	4881	4138	7650	7542	8974	9434	8047	9297	7763	7911	6813	7379	6467	7452	4390	2950	2363	3353	3993	3137	3410	3330
101	168.066	Homovanillin; Pyridoxine; 4,6-Dihydroxyquinoline	1103	1017	1443	902	898	1347	1165	885	1194	1055	24158	26041	19286	19394	24084	27883	18455	20432	22535	20556	18260	18605	30047	29314	29903	28221	29065	27749	22658	21443	23563	22072	22368	21508	3123	2131	1185	1559	3961	2866	1321	2091
102	168.078	Methyl-His; Deoxyhexose	662	811	636	527	664	568	658	737	622	533	8920	9313	8352	7702	10338	9585	6743	7246	6377	6624	7520	7602	22849	23507	21483	22254	21729	21517	15024	15373	16883	16618	17491	16551	1306	2110	1453	998	22165	17117	9082	5700
103	168.99	Glycerone phosphate	16838	18378	17142	18314	15039	18143	16274	17830	18413	17536	36818	33954	32792	34685	36725	34086	32496	31218	29626	32199	34352	38452	54767	46686	46708	49793	44326	46894	46264	44071	43460	48281	47591	46119	19440	16620	17813	17362	19644	18563	16796	15151
104	171.006	Glycerol 3-phosphate; Cysteic acid	1968	2121	904	1323	1089	1094	1170	915	1185	2024	11248	11836	12331	11291	13183	11579	10605	9387	9378	11261	14425	15916	9523	11625	9022	9181	10312	9558	10601	9116	10864	12227	11087	10401	1498	1680	1631	1269	19693	12491	5310	5519
105	171.139	Decanoic acid (FA10:0)	7511	6377	6870	8116	7840	7705	6964	6739	8278	6748	17704	18398	20233	18775	16432	16587	17661	19178	21393	21770	19799	20583	15540	17629	15424	15829	14045	16246	18366	16440	18533	16082	16728	19188	8840	8855	9462	8744	11664	9856	9104	10689
106	172.041	2-Quinolinecarboxylic acid	432	453	223	347	818	464	484	275	385	541	2243	2448	2302	1993	2446	1809	2123	1776	1812	1662	1579	1647	6264	5603	5488	6005	5593	5178	6207	5903	5954	5311	6480	5431	1559	434	269	400	1466	1925	1137	751
107	172.991	Phenol sulfate	3787	3265	3506	3413	4058	3912	3395	3866	3342	4229	4011	3828	4425	4123	3791	3503	4473	2965	3862	4052	3463	4701	2938	3287	2838	2599	2790	3069	2885	2638	1964	3094	2499	2929	2692	2882	3219	2885	3565	2925	3497	3288
108	173.009	Aconitate	2270	2702	2012	2130	2556	1434	1953	1914	1787	2132	13952	13871	13538	14588	17415	17306	16301	15989	20041	19202	17216	18218	16723	19097	21152	21185	17943	20218	13010	13333	12012	14277	10777	12475	3148	3576	2758	2917	38859	35108	17510	18204
109	174.041	Acetyl-Asp	2447	2077	2330	2192	2663	1829	3206	2323	2904	2913	240977	242033	251814	256880	287951	303710	156047	151681	147344	145916	212528	212639	1039990	1069747	1079461	1111927	1015661	1055961	730633	745095	833014	837211	849919	884691	10700	8069	6308	5989	6204	5415	4589	3746
110	174.088	Citrulline	966	939	918	668	1257	1327	933	1574	827	1070	5177	5072	5123	4566	5886	5320	4202	3282	4134	3460	3512	3637	8081	7680	6017	7761	6871	6332	5669	5493	5283	5596	5752	6006	1958	1481	1379	1337	17199	13067	5272	4820
111	175.025	Hexuronic acid; Ascorbate	2630	3326	1996	2383	2220	2762	2445	2749	3049	2577	3900	3766	3107	4572	4765	3122	3442	3557	7776	5231	4546	4721	6905	7089	7702	7660	8220	9204	6694	6784	6447	5693	6618	7155	2946	2125	3007	3135	572353	444326	201466	172692
112	177.04	Glucono-lactone	3223	3902	3514	3815	3222	3203	3418	4322	2974	4076	3115	4008	3664	2914	2937	3169	3028	2947	2854	2479	2848	2541	5348	3989	5446	4569	4481	4495	3552	4542	4051	4666	4332	4360	3867	3520	3306	2931	4872	4824	4635	3951
113	178.051	Hippurate	1035	818	731	415	514	1025	771	1313	778	748	9550	10888	7387	9326	11848	8497	8396	9307	8793	11822	7952	6885	30429	28815	26590	30621	26261	26139	22469	27117	26774	22656	24222	25770	2253	1919	1562	1311	3250	2309	1693	2080
114	178.072	Hexosamine	946	682	1085	1088	1432	1467	1566	928	1778	1037	1396	1069	1405	1381	1033	915	1323	1023	1125	1350	1113	1208	1679	1198	1651	1475	1297	1198	2228	1639	1665	1349	1879	1565	1575	1386	2093	1795	2586	1742	1495	2007
115	179.035	4-Hydroxyphenylpyruvic acid	1620	1864	1654	1683	1239	1235	1109	1599	1548	1340	2506	2688	3257	2779	2375	2522	3267	3261	2668	2379	3116	2826	3155	2370	2380	2690	1915	2771	2082	2478	2179	2471	2309	2435	1272	1584	1759	1739	1967	2259	1968	2205
116	179.056	Hexose	14321	14159	26192	15614	34463	18844	26724	20986	34787	23629	529952	536202	420434	434511	487701	500418	407188	414178	488790	475810	384555	383185	752754	722982	734576	717164	615566	617065	466468	468047	480994	474358	446673	441646	43570	32823	36144	32671	148610	109105	58902	51586
117	180.067	Tyrosine; 2-Quinolinecarboxylic acid	3957	3344	3354	3720	3666	2961	3809	4017	3979	3591	178305	174793	166918	170382	183119	184956	84705	86117	104001	97906	112674	116562	120790	123425	121782	120487	111767	105256	89748	88337	101872	98667	96645	95238	16987	13636	8100	8398	53594	37018	21487	18967
118	181.05	Homovanillic acid	2352	1998	1684	1504	1933	2146	1536	1789	2152	1923	4437	4934	4011	4621	4293	5346	3471	3422	3472	3144	3631	3491	5021	4430	4659	5306	3256	4125	3707	3362	4490	3829	4089	3970	2377	2555	1631	2464	3852	1624	2760	2656
119	182.97	3-Phosphonooxypyruvate	416	393	354	485	345	402	228	135	427	400	2656	2725	2372	2533	2752	2740	2478	2283	2650	2736	2681	3063	3498	4195	4531	4139	3853	4307	2410	2679	3226	3056	3608	3081	465	321	363	251	816	561	451	637
120	183.068	Choline-P; Hippurate	1946	1769	2752	2049	2046	2442	3637	2670	2361	2786	1586	2570	2976	2192	3093	2443	4221	3956	2434	3975	2518	2818	3257	4508	2779	2613	3083	4165	2776	2363	3180	2246	4178	2958	1997	2662	2299	2019	9064	7545	4140	4982
121	184.002	6-Thiourate; Phosphoserine	1181	1390	800	1115	932	967	1040	1043	633	1024	74366	69910	80035	75492	89245	80678	52602	47699	41092	45042	90163	89336	196168	189044	178875	168957	179571	178787	95856	95994	132353	118452	142767	140246	3771	2817	1120	1683	22980	17930	5411	5892
122	184.985	Phosphoglycerate	25234	24854	24795	24304	21577	22916	20290	23304	22555	23263	28701	32376	28021	29207	32942	31920	26266	26541	26172	27264	28892	30731	29040	28761	27708	30079	26829	28254	26948	25962	25403	28269	28056	27395	25960	25816	22165	24335	25483	24556	24584	24179
123	186.161	Acetylspermidine	1429	1363	859	961	340	892	779	533	550	548	3432	2995	3207	3145	3151	2921	3147	3129	3396	4126	3662	4017	2899	3477	2464	2426	2833	2743	3284	2786	3136	3411	2850	2772	793	1252	1335	956	4774	4976	2174	2108
124	188.056	Acetyl-Glu	336	413	639	420	594	913	712	287	848	812	19063	22402	20446	22718	21876	23144	10625	11285	12288	11439	13190	13272	32567	33513	31650	30326	27945	26255	22756	23201	24260	26607	22472	24663	1294	1246	985	1040	2858	2822	1106	1138
125	189.005	Oxalosuccinic acid	510	416	309	164	328	331	309	421	393	474	3219	1920	1930	1620	2272	2595	1609	2111	1935	1689	1977	1326	8841	8013	9132	8150	7878	9212	7973	8485	6924	6702	6530	6777	666	404	870	466	1552	2093	2200	1386
126	191.02	(Iso)Citrate	34944	49950	28213	35399	21285	31376	21184	26480	19749	24715	78994	75686	68078	72971	88181	86649	65451	62461	74951	75616	106115	106205	166928	172377	188742	197258	180583	178770	76796	73616	80739	82231	90293	90750	39945	62124	31289	40820	42191	49043	25735	31268
127	192.067	2-Methylhippuric acid	477	589	728	556	785	433	603	1203	695	623	2362	2636	2751	3300	2707	2744	2867	2551	2039	2106	1632	2421	8467	9863	8541	8215	7902	8871	9307	9742	9138	9001	9604	8629	1329	1095	1201	911	2530	2121	1874	1714
128	193.036	Hexuronate	1766	1172	1255	1102	1602	1209	1262	1169	1155	1323	3344	3556	3110	2821	3657	3064	3194	3731	4055	3962	5129	4548	4619	4352	4480	3825	4395	3605	2833	2665	2475	2595	3119	2725	2481	2899	2865	2095	1709	1678	1917	1685
129	195.051	Hexonic acid	3641	4013	3365	3121	3708	2806	3448	3613	2959	2862	30319	29515	24229	23709	30160	29924	22170	25124	24226	23953	31850	33471	29605	29574	26737	27361	22682	24684	20976	19165	22157	24254	20471	20682	7328	8946	5010	4743	54002	44864	24398	22084
130	198.018	P-homoserine	315	285	383	328	343	379	216	265	618	259	1548	1459	2223	2047	1501	1428	1090	1542	1527	1334	1930	1515	2195	2497	2543	1870	1807	2143	2032	2375	1893	1353	1497	1374	342	285	318	251	1007	835	433	393
131	198.113	Ecgonine methyl ester	295	580	369	403	414	173	557	272	328	445	5789	6359	4826	6773	5400	5499	5741	5847	8195	6204	6422	7328	4210	5079	4948	3582	5689	5370	5285	6207	4092	5631	6036	6643	672	519	187	623	643	800	651	220
132	199.001	D-Erythrose 4-phosphate	481	296	568	518	541	615	466	289	323	579	4945	5183	5828	4495	5885	6078	3529	4229	4404	4353	4884	4640	5180	4426	5204	4914	4077	4188	3635	3792	3568	3865	4044	4712	908	1392	641	193	2295	2022	1181	733
133	199.17	Dodecanoic acid (FA12:0)	8578	9372	10746	7975	10274	8405	9980	9187	11336	10987	13138	11978	15279	14478	12197	12317	13306	14861	13900	13778	14573	16335	19471	20588	18489	19360	19417	17338	18653	19499	20581	20970	18003	17844	12344	10620	10664	11406	44687	33972	23569	22648
134	202.108	L-Acetylcarnitine; Methyl-Tyr	713	569	432	597	760	785	766	401	826	565	15496	13636	13861	14670	14307	13242	12293	9320	11031	13887	12944	14079	20336	18152	14827	15751	14634	15217	11398	12363	15424	13968	13245	14641	722	1125	785	714	2624	2623	1413	1623
135	203.083	Tryptophan	1696	1644	1526	901	1141	1466	1162	1174	1029	1146	70817	68557	69267	68316	70533	74594	33532	34090	37681	35348	39698	39364	46636	43732	45824	44071	41138	41120	32878	33577	37428	37861	35579	36510	4728	4627	3088	3200	25854	19311	8209	7199
136	204.066	5-Methoxyindoleacetate	687	359	343	256	352	553	347	476	423	598	3382	1818	2543	3027	4234	2857	1984	2246	2572	2159	2386	2819	4585	5092	4536	4411	4520	4966	4016	2979	2569	2611	4123	4333	803	392	675	346	2027	1679	924	1300
137	205.136	Monoethylglycinexylidide	609	317	215	147	285	246	340	418	513	46	9400	10856	9709	10711	10246	10365	8788	8406	10336	9587	11021	10346	12010	9416	6407	6420	8206	9185	10122	9419	11251	9133	12348	13011	817	506	625	624	1047	1069	711	490
138	206.068	Dihydrolipoamide	212	367	360	307	441	544	346	258	578	301	3001	2715	2182	2482	3239	3207	1342	1812	2012	1750	1744	2251	1447	1435	1471	1661	1609	1241	1670	1406	1505	1288	1113	1452	740	609	529	222	1216	802	1067	616
139	209.067	Sedoheptulose	992	706	1874	954	2051	1160	1739	1112	1627	1677	1765	2033	2242	1769	2598	1902	2519	1850	2300	2025	2124	2168	3644	2998	2747	3118	2988	2694	4038	2136	2410	2192	3563	2248	2732	1321	2773	3333	2914	2086	2827	1967
140	209.081	2-Hydroxyiminostilbene; Sinapyl alcohol	988	986	726	1495	1350	1016	1051	945	1314	1049	4688	6099	5329	5261	5211	4955	5029	4892	5279	6076	4693	4445	4949	5920	4008	5995	4134	3837	6141	6927	5964	5210	4883	5567	1740	1688	972	1360	2079	1967	2377	1881
141	210.029	Phosphocreatine	603	284	304	273	784	577	500	246	456	259	17566	17282	16627	15468	16256	19574	11955	13430	13836	13975	20454	20379	19914	19020	17744	18920	17304	18614	18614	16342	16793	17552	18301	17717	2173	2076	1011	965	56700	35104	13726	11773
142	214.048	Glycerylphosphorylethanolamine	830	593	1098	836	1245	1061	679	839	1428	1222	19656	18256	17996	17527	17912	18664	17599	17081	18944	17084	19941	21067	47861	47287	44874	43656	39126	37589	42850	42479	47661	51451	49899	50060	2383	2473	1399	1323	11197	7265	4602	4428
143	217.083	gamma-Glutamylalanine	877	961	733	749	797	763	907	441	824	1006	7044	7355	6523	6358	6980	7829	5549	6790	5207	6310	7735	6870	11681	10840	11712	9609	9149	8493	7541	7068	7866	7042	5532	7419	920	829	919	774	2053	1942	1468	1410
144	218.103	Pantothenic acid	1837	2149	1637	1863	1974	1176	1893	1679	1368	1386	302258	294831	251685	253393	338883	332131	236202	227206	209407	206869	290725	291461	341303	338165	302696	304380	298840	298971	246822	242108	257226	247674	284477	275150	7112	6129	3803	3811	54268	32894	12832	10296
145	220.083	N-Acetylgalactosamine	287	546	512	398	279	232	205	441	370	477	1612	1381	1170	1464	1353	1344	1125	1296	1306	1090	2041	1508	1825	2615	2123	1879	2045	1841	1201	1702	1903	1803	1363	1747	588	304	335	469	3497	1837	1062	1351
146	221.06	L-Cystathionine	3181	3773	2342	3438	1895	1840	1173	1824	1239	2138	5419	3946	5447	4081	4570	4103	4096	3515	4365	4110	4738	5460	11593	11827	9800	9827	8793	9120	5652	6577	9155	7761	7017	8083	2313	3042	1791	2427	5176	5580	2428	3355
147	224.105	alpha-[3-[(Hydroxymethyl)nitrosoamino]propyl]-3-pyridinemethanol	376	566	371	339	323	314	627	371	369	508	2548	2891	2167	2431	2421	2383	1685	2151	2632	2576	3204	2048	1389	1550	1830	1384	1364	1613	2109	1953	1841	1431	2201	1336	597	878	284	687	1959	1579	963	1146
148	225.099	4-[(Hydroxymethyl)nitrosoamino]-1-(3-pyridinyl)-1-butanone; Carnosine; N-Ac...	400	703	547	286	468	399	296	488	320	388	4520	4048	3416	3303	3967	3864	3163	2806	3092	2631	3128	3050	5688	5000	6564	5836	4820	5333	3959	4524	4904	4153	4517	4152	974	743	149	591	46462	31733	9281	6931
149	226.012	L-Glutamic acid 5-phosphate	4376	4233	4002	4059	3646	4639	3546	4229	4700	4721	4193	3832	4026	3888	3998	3901	2275	2025	2240	2687	3937	3321	7738	7835	7210	6496	6914	4898	4278	5086	5647	4627	5399	4808	2311	2611	2484	2109	2675	1276	1851	1532
150	226.083	L-3-Hydroxykynurenine; Deoxycytidine	347	495	481	573	783	233	585	489	373	414	2140	1472	2369	2302	2348	2077	2252	1573	2172	1777	1890	1183	2420	2430	2236	1502	1834	1979	2161	1305	2149	2197	2167	1916	734	767	487	443	1289	891	635	792
151	227.201	C14:0	30668	30568	35745	31263	32955	30663	34564	31237	36284	30277	41798	46745	44421	44822	43326	40805	50117	49753	52718	48455	54576	52226	54568	54272	47757	52339	52169	54372	54600	52883	58515	55606	56582	54846	42965	30269	35346	33222	82366	66827	65649	50284
152	228.028	5-Phosphoribosylamine	550	475	314	318	607	484	375	452	444	712	2564	2675	2677	1784	3082	2913	1190	1761	1494	1586	1984	1237	7227	6848	5238	4387	4460	5026	3701	3109	3144	4010	3283	3796	640	732	457	684	574	1046	580	854
153	229.012	Pentose P	1452	709	841	1178	919	907	741	980	790	901	10621	9178	10196	9510	9574	10402	5909	5588	5878	4772	6853	6898	14891	13310	12471	13717	12180	11896	9390	9987	12316	10984	12471	12385	2377	2616	1407	1925	4217	2637	2279	1636
154	233.167	Lidocaine	684	1145	950	897	636	611	658	912	683	948	6177	5566	6118	6117	5861	5451	6494	5197	7413	6623	6730	6631	7106	5729	5097	4414	6264	5016	7860	6870	6011	6769	6890	6400	1457	867	977	906	1614	1297	1164	1091
155	235.072	L-Formylkynurenine	496	735	840	382	628	539	697	531	619	539	1807	1469	1229	1137	1498	1184	6550	6374	8167	7328	16248	13840	2346	2421	2698	2149	1998	2063	2223	3028	2577	2916	2042	2283	1057	614	1207	521	1559	796	1031	835
156	238.094	Dihydrobiopterin	306	483	533	602	356	468	605	677	639	487	2173	2426	1661	2085	1357	1560	2059	2087	1801	1684	2827	2655	2853	2037	2121	2890	2306	2216	3290	3092	2693	2613	1896	2067	585	728	551	551	912	686	380	822
157	239.015	L-Cystine	884	1299	954	1204	1061	1302	791	1061	759	748	3030	3519	2818	3156	2952	3433	3715	4957	5253	4112	3029	3726	2768	2088	2880	2677	2201	2284	3197	3612	2278	2733	2050	2185	1064	1362	943	1038	1106	1314	736	1432
158	239.115	Anserine	427	309	246	362	455	271	268	204	213	307	2202	2456	1591	1474	2041	2192	1426	2385	1918	1859	1527	1400	3387	3446	2700	3130	3194	3609	1967	2203	2259	2165	2125	2329	408	511	349	454	87876	56992	17184	14341
159	239.238	Palmitaldehyde	408	460	340	479	153	477	458	570	383	278	1099	1415	838	946	1408	1277	1186	1101	1772	1816	1256	2436	820	1015	1149	1257	965	1224	1003	1129	1002	910	817	1121	873	369	421	185	2757	2623	2252	1074
160	241.059	5-phosphonooxy-L-lysine	1720	1695	1397	1012	1614	1527	1721	1226	1737	1601	10792	10855	13178	11697	10589	12385	11230	9586	10060	10640	8239	11769	13119	11686	10511	10701	10401	13043	9248	9138	9088	9153	9850	7117	3375	4409	2464	3486	13620	13346	6001	6185
161	241.083	Thymidine	1022	1575	1258	1149	1200	1418	1418	1039	1237	1525	3181	4178	3623	2102	3281	3370	2664	3190	3289	3724	2762	2617	6785	5619	6113	4792	5298	5079	4166	4747	5126	5430	5414	4863	1009	1517	1162	858	2722	2406	1490	1421
162	243.027	Fucose 1-phosphate	370	302	365	175	486	730	506	672	452	727	3484	3180	1968	1511	2115	2204	1644	1801	2752	3559	2300	1815	2303	1882	2026	1938	1490	1334	1663	1935	2163	1814	1056	1599	542	675	989	344	1512	1413	981	822
163	243.062	Uridine	3032	4173	4070	2701	4037	3095	3973	3162	4403	3559	6430	6293	5031	4906	5149	5581	6865	6007	6335	6513	8061	7164	11839	11323	10240	10539	9134	9192	8573	9692	10140	8656	9172	9544	4780	4612	4189	2861	19436	15649	8243	7369
164	249.055	gamma-Glutamylcysteine; Pyridoxamine 5''-phosphate	497	331	493	615	603	613	508	251	425	468	10581	12671	10513	11634	10793	11903	3470	3014	2891	3984	4881	4251	5449	5727	5301	4993	5126	4137	4177	3553	4619	5147	4735	4388	885	639	805	460	1852	2178	1501	1095
165	251.077	Deoxyinosine	378	328	654	224	577	284	386	362	499	525	1093	1387	1075	1052	1181	1211	1294	1134	1200	1088	957	1181	2043	1496	1813	1857	1884	1617	1739	1786	1888	1840	1793	1649	1023	1087	629	475	1951	1564	634	1009
166	253.093	Galactosylglycerol; Benzo[a]pyrene	767	846	675	325	352	592	567	493	379	846	1673	1894	1691	1837	1252	1786	1012	1701	1483	1404	1194	1389	4809	4328	4631	3826	4490	3734	3398	2845	3222	3563	3111	2511	1063	554	651	583	1630	1290	915	956
167	253.217	Palmitoleic acid	27556	23144	26164	22324	22925	20931	22518	21076	24557	21913	30989	27785	27642	25765	29154	27020	33174	28956	29837	27141	43343	40189	28371	29035	27842	30793	32465	30570	27677	29335	29484	33131	31353	29393	36470	27250	24978	22147	106367	85365	65362	57372
168	255.073	Nicotinate D-ribonucleoside	325	176	463	474	390	490	286	324	428	375	1426	1832	1361	1662	1671	1434	1328	1793	2084	1920	1473	1040	1776	1557	1813	1282	1024	1234	1016	1411	1140	1057	1490	1113	661	444	228	476	1898	1548	913	753
169	258.038	Hexosamine P	308	612	328	449	560	488	355	205	363	435	3650	3377	3440	2374	3435	3004	2318	2270	2823	2894	4092	3735	5093	4693	4822	6200	4186	4407	3328	3359	3534	3612	4406	4340	609	625	483	430	2355	1277	966	1036
170	259.023	Hexose P	1245	1310	1338	1280	1833	1246	821	625	1053	702	24692	24225	24806	22262	24185	24564	18784	18966	17164	18486	26530	25621	34174	38006	32541	33051	34912	31292	26988	26303	25452	28510	27106	32345	4552	4433	1979	2803	50257	37742	13768	12790
171	264.952	Glyceric acid 1,3-biphosphate	1608	2802	743	2215	1244	2183	887	1692	766	1421	3768	3182	4259	3958	4778	3363	3033	2614	2347	2665	3382	3043	4734	4033	3789	4093	5254	3455	3364	3361	3257	3407	3450	3250	5804	7428	2076	2328	2176	2428	1329	2016
172	266.089	Adenosine	581	700	292	630	558	599	796	558	651	373	2915	2364	2275	2448	3315	2828	2879	2270	2724	2520	4015	2685	4169	5387	4371	4880	3823	4258	4055	4835	5109	4760	5753	4815	2404	2332	945	877	9300	5833	3298	2607
173	267.073	Inosine	1211	877	977	956	1486	1039	1630	1103	921	859	2647	2691	2582	2364	2639	2468	2621	2345	3185	3025	3684	2625	5716	5410	5518	4726	4015	4668	4824	4282	4656	3993	3532	3377	2516	1398	1103	988	10159	7769	4159	3211
174	275.017	6-Phosphogluconate	562	639	809	626	885	543	454	610	430	492	7283	6683	9020	6447	7073	7478	4442	3631	4219	3781	5456	5155	9008	9124	9150	7276	8037	8054	5587	5615	5734	5112	5633	6224	2676	4324	1902	2553	3389	3676	1573	1432
175	277.217	Alpha-Linolenic acid	2801	2314	2375	2241	1797	2309	2321	2052	2470	2127	3189	3314	3151	2520	2819	2979	2832	2682	3767	4021	3562	3044	3332	2483	2534	3137	3557	3002	3909	3801	3261	2821	3737	3196	3191	3081	2415	2376	17307	13009	8074	7724
176	279.233	C18:2	39732	38945	39454	36199	40348	39734	38616	39740	40316	40561	39907	41704	39907	41807	42948	43364	40763	41508	51707	49155	48556	50049	38683	40164	37725	39452	49476	48514	45513	47667	47766	45822	45723	46304	46021	45077	42393	45745	239654	173571	120556	102355
177	282.084	Guanosine	858	511	413	527	431	619	397	240	715	707	1739	1839	2131	1846	1945	2140	2690	1376	1831	1501	1462	1659	2522	1926	2472	2893	1600	2539	2380	2997	2601	2646	2038	2606	1273	977	532	680	6907	5093	1515	1716
178	283.068	Xanthosine	961	654	549	528	522	578	541	635	420	740	2112	2302	2618	1988	1881	2152	1708	1445	1801	1795	2138	1782	2714	2642	2048	2323	2702	2660	2698	3377	1714	2858	2150	2195	689	455	834	684	1155	1132	762	903
179	283.077	9-Hydroxybenzo[a]pyrene-4,5-oxide	809	624	1015	878	756	583	999	875	811	643	1163	2014	1598	1359	1447	1444	1364	2343	1420	1725	1621	1656	1945	1795	1625	1852	2167	1541	1747	2182	1665	1783	1837	2134	702	856	594	888	4165	2502	2489	2173
180	284.029	2-(Formamido)-N1-(5-phospho-D-ribosyl)acetamidine	518	317	539	523	597	309	408	772	406	321	4111	3684	3102	3990	3888	3597	2151	2619	2597	2843	3552	2200	3469	2428	2861	2755	2271	2612	2368	2603	2942	2383	3127	3029	676	761	857	658	1741	1014	983	706
181	285.224	Vitamin A	550	416	610	417	412	179	324	386	449	414	4059	3736	4839	4107	3623	4630	4156	4680	6157	5290	5534	6278	4145	4919	3483	4196	2954	4115	5772	3362	4292	3805	5649	5801	573	375	586	444	2505	1549	1208	614
182	289.033	Sedoheptulose P	382	777	164	809	473	816	410	562	843	692	2515	2035	1705	1990	2398	1687	1506	2195	1267	1641	2203	1607	10729	8521	10184	9006	9099	9063	10346	9126	10251	10317	11604	10923	1269	947	831	662	2546	2494	1504	1629
183	289.115	Argininosuccinic acid	332	155	315	317	470	288	426	178	501	630	2203	2362	2175	2030	2302	1823	1833	1900	1410	1115	1748	2115	6300	6076	5888	5636	4706	5676	6006	5713	5176	5431	5425	5432	737	651	533	382	20732	15639	7210	6907
184	295.228	9,10-Epoxyoctadecenoic acid; Dehydroepiandrosterone	1854	1804	3116	2379	2286	2734	2134	2283	2618	2298	4770	5909	4308	5423	5393	5998	4285	5434	5194	4938	5073	4341	4630	4458	3605	3868	4803	3584	3933	4172	4547	4525	5929	5724	2738	2361	2092	2746	5949	5527	5768	4917
185	296.082	Orotidine; 5''-Methylthioadenosine	3229	4120	3057	2976	2544	2673	2638	2229	1857	1881	10440	10086	10341	9718	10073	10559	6899	7100	8656	8064	10215	8782	9638	8845	8808	10041	9195	10478	8807	8891	9446	8861	10209	8278	3918	3660	2767	2256	8747	7498	4841	5365
186	298.275	All-trans-13,14-dihydroretinol; Sphingosine	240	303	384	397	371	256	476	416	321	234	29653	27961	41828	41891	23323	25144	35283	35619	45498	43676	37455	38100	21646	23307	24181	21628	23330	21670	30038	30389	28615	30289	28721	27642	1128	911	688	612	3692	2731	2054	1440
187	300.041	Acetylglucosamine sulfate	4221	3667	4771	4180	3445	1947	3665	3859	2589	3968	11975	12053	11581	11140	11389	13359	7207	7802	7392	6538	11338	10541	54624	53602	45062	44158	48975	51033	24124	24531	33005	29708	32717	33236	2664	2830	2628	3588	4951	4123	4084	3737
188	300.049	Acetylglucosamine P	1206	1487	887	1422	1022	810	1682	980	959	1090	8087	9505	9239	8514	8473	10306	7269	7329	7117	7526	10976	9168	17896	17750	16663	14925	17203	15878	10478	10656	11335	12298	11656	12089	1005	929	923	1141	6219	4656	3530	2725
189	301.217	Eicosapentaenoic acid	2398	2076	2728	3568	2377	1869	2911	2542	2902	2508	5826	6780	7007	5807	6586	5850	5720	7051	8659	7713	7307	7160	6715	5157	6559	5800	6739	7130	6837	6016	7542	7066	7872	7346	6242	3380	3770	3705	11650	6281	6491	6403
190	303.083	N-Acetylaspartylglutamic acid	346	276	500	364	246	364	309	358	534	356	21798	21428	23885	23797	25973	24050	23429	22215	20536	20051	33990	31117	1927	2377	2837	1973	2706	2791	2506	2238	2863	2414	2894	2764	879	917	145	708	1460	1294	809	1006
191	303.233	Arachidonic acid	10929	9378	9324	9491	9798	8606	10483	8865	9463	9391	17613	19396	17264	16866	17695	19346	20662	19640	20534	22210	21312	20392	40473	38113	36281	37921	38427	42332	35484	32014	38762	37614	39614	39236	12850	13955	11162	12300	129553	82113	56386	46437
192	305.248	8,11,14-Eicosatrienoic acid	4947	3863	3735	3848	4378	4657	3499	5049	4118	3386	6359	7288	7033	7380	7744	6094	8460	8568	7375	8695	9467	7618	12112	11821	12100	10878	10365	10648	11222	9798	9598	11508	11620	11809	5496	4914	5234	4177	18571	15760	11124	9242
193	306.049	Thymidine 3'',5''-cyclic monophosphate; dCMP	325	488	309	646	800	407	359	521	254	497	7027	8062	6162	6021	6859	6842	5387	5173	5811	5073	5618	4744	10039	9993	10420	10176	9262	8887	12507	13365	10547	8692	9370	8817	353	622	413	542	1664	1326	1004	886
194	306.077	Glutathione	9418	12112	7821	8417	7414	6329	7508	7717	5418	5339	3134380	3157617	2892405	3068111	3119578	3251574	1407080	1439612	1396182	1408873	2318041	2458164	3499499	3519949	3235239	3385277	3185171	3354992	1881061	1975253	2162859	2220706	2228459	2411020	116338	94989	48581	46856	336567	253404	126763	116688
195	307.033	dUMP	761	308	678	455	473	578	553	532	402	360	2464	2355	2704	2643	2258	1741	1619	1554	1942	2430	1632	1905	2588	2468	2595	2878	2463	2263	1971	2867	2035	2554	2632	2568	514	914	596	579	1886	1059	1205	1377
196	311.223	13-L-Hydroperoxylinoleic acid; 16a-Hydroxydehydroisoandrosterone	1829	1477	1502	1161	1250	1057	1935	1243	1805	1458	4191	3850	5162	3723	4830	4601	3904	3868	3783	3466	5362	4310	3810	3894	3784	3543	3366	3414	3336	4569	3603	4157	3828	5267	1629	1711	1598	1561	2708	3350	2351	2994
197	311.295	Arachidic acid	11634	13633	12711	11072	12468	12539	11979	12323	11637	12549	20268	17792	19211	20157	17439	18914	19880	19772	20071	18533	19837	19697	16574	16331	17775	18024	19540	16238	19261	17258	19562	19111	19656	20526	13123	13249	12557	12930	15881	14986	16530	15364
198	313.045	FGAR	324	381	528	281	473	525	229	434	576	267	2382	2617	1914	1876	2355	2782	1227	1646	1183	1348	1464	1765	6327	6702	6409	7175	8012	5856	3420	2421	2554	3003	3258	2580	734	540	526	548	1357	1107	508	1018
199	315.196	4-Hydroxyretinoic acid	618	638	611	1126	854	829	1465	1044	1141	726	3498	2901	2176	2942	2862	2525	2825	2691	2514	2718	2921	2783	3623	3057	2602	2973	3127	3071	2524	2299	3396	2753	3140	3209	1300	935	879	1089	1733	1577	1174	1133
200	319.228	5,6-Epoxy-8,11,14-eicosatrienoic acid	823	1089	876	645	1124	873	746	658	779	677	3107	3556	2360	3131	2686	3556	2961	2976	3727	3178	2814	3285	2820	2899	2752	2777	2359	3248	2884	3383	3875	3442	4298	4075	1556	1384	1051	834	4802	4753	3626	2973
201	319.263	C21:3	207	308	357	220	444	393	317	550	354	535	8682	8747	10171	10699	5786	5615	7792	8704	9890	9704	5153	6588	4227	5899	6702	7000	6286	6455	8941	9879	9898	8691	6167	6656	778	396	586	283	1264	704	737	936
202	322.045	CMP	1747	1647	1916	1564	1774	1604	1261	1856	1440	1688	7228	6337	8149	6982	8109	7066	4210	3846	3853	3639	5890	5139	9734	9586	9008	8246	9857	8993	7122	7714	7706	7181	8357	8428	1884	2016	1216	918	4961	2934	2184	2421
203	323.029	UMP	6756	6468	5140	5775	5250	4834	4860	5760	4794	4689	15917	15455	21617	20130	20565	21101	11744	10206	9610	10250	13002	13512	19764	20682	17608	18600	19382	19600	12934	11879	15908	13497	15530	15629	4816	4013	3634	3479	22622	16779	9106	8744
204	324.094	N-Glycolylneuraminic acid	202	211	227	534	473	156	541	317	290	516	2845	2404	1923	2054	2064	2024	1791	1649	2077	1558	2099	2567	4028	3554	3784	2931	3180	2639	2556	3029	3313	2967	2581	2866	760	375	387	657	2720	2728	1277	989
205	325.094	cis-beta-D-Glucosyl-2-hydroxycinnamate	479	503	672	456	659	499	475	429	846	747	2088	1293	1741	1559	1772	1424	1529	1647	1601	1143	1862	1713	2178	1834	1805	1900	1874	1655	2012	2614	1897	2264	1392	1770	706	777	597	579	1043	1057	610	517
206	327.05	2,3-Epoxyaflatoxin B1	349	608	332	474	850	600	483	818	594	641	4340	3410	3509	3560	3656	3638	3536	2216	4564	3763	3584	3315	3144	4211	3503	3684	3070	3375	3885	2963	3254	2612	2729	2482	855	446	683	860	1125	1535	553	558
207	327.233	C22:6	2706	1669	2309	2614	2720	2518	2057	1459	2392	2195	24768	27190	21148	24472	26682	24363	29435	29671	32834	28657	28035	29217	22292	22426	21513	20325	19058	21664	21142	22410	21939	22041	25703	25052	4177	4140	2430	2161	28868	19657	11697	9522
208	338.989	Hexose bisP	2349	4432	2611	2890	1769	2312	1052	2578	1419	1862	24344	22059	24497	22697	26420	22726	21584	20068	21483	18150	27781	27975	46348	41077	47406	41008	42518	39944	40753	39173	47513	43060	54602	51039	30548	41124	12541	17656	22711	27822	9448	14080
209	340.125	Lactosamine	411	477	303	168	340	272	740	430	463	554	3145	2274	2230	1999	2428	1892	1917	1111	2545	2021	2301	2345	2752	1951	1800	1769	1355	1522	988	1579	1461	1821	1931	1965	955	596	650	657	1881	1933	601	1195
210	343.125	Melibiitol	425	836	526	428	588	563	505	677	890	698	2536	2616	2464	2461	2215	1960	1702	2846	1832	1835	2884	3175	3105	2205	2459	2204	2513	2338	1364	1613	1563	1845	2286	2041	1034	757	652	740	1750	1703	852	1070
211	345.06	Aflatoxin B1 diol	605	385	181	176	523	311	460	343	158	593	2693	3177	2541	2566	2459	3028	1299	1679	2217	2307	2499	2391	3748	3261	3350	3567	3266	3294	2217	2473	2992	2708	2397	2165	470	462	135	494	864	1043	844	823
212	346.056	AMP	20085	22446	21677	17548	20108	18378	17283	17241	18010	18711	52084	52554	63536	66014	58342	59775	30255	31038	30064	27999	42348	46879	39723	35726	35320	35063	33477	33169	24131	23109	29027	25590	25439	26270	15617	14187	11981	13369	65313	49687	28157	25135
213	347.04	IMP	1158	2015	1530	2047	1529	1162	1596	1252	1650	1145	7948	5668	6137	6508	6376	6706	3071	2431	2557	2975	5400	4885	9552	11637	7492	7841	9065	10073	3819	2961	6670	5070	6613	8064	997	1298	1101	1316	11517	9161	4871	2760
214	351.218	Prostaglandin E2; 11-Dehydrocorticosterone	400	372	523	666	583	892	796	687	837	462	2990	2700	1782	2130	1798	1889	2191	2563	2482	2262	2166	1893	2615	3527	2070	2694	3318	2460	3592	3374	3935	3838	3732	4456	639	701	734	708	1052	1747	765	1094
215	362.051	GMP	5005	5700	5278	4551	2830	4769	4400	4225	3164	4281	10510	8394	11976	11271	10228	10331	7077	6493	6234	6111	8865	7276	10498	9021	8821	10041	8686	7894	7485	7462	7298	8013	9148	8429	3540	3454	3340	3177	13959	11408	6437	6027
216	365.051	Phosphoribosyl formamidocarboxamide	265	514	261	101	356	329	428	230	265	152	1327	2306	1201	1966	1957	1962	1316	1252	1675	1573	1486	1921	2468	2354	2383	2441	1847	2210	1794	1797	2192	1686	2084	1438	485	433	447	628	3694	2187	1038	389
217	367.018	Orotidylic acid	723	617	594	911	549	648	465	766	508	375	15179	15937	14157	16374	15278	15871	8418	8113	7559	9569	10816	13259	17297	18018	18206	17100	16007	15314	9448	11204	12585	13464	11487	12720	866	907	498	656	3013	1835	1034	870
218	367.212	Prostaglandin G2; Aldosterone	271	556	333	457	770	465	342	367	532	485	17946	18124	17402	17294	15509	14579	17457	17769	15626	14781	17476	16267	15590	12054	12714	13456	13244	13334	13617	16505	17844	16528	15885	15264	757	525	343	536	889	1346	808	930
219	369	Sedoheptulose bisP	1063	1310	1204	1945	1147	809	620	1416	671	768	2554	2976	2005	2255	2251	2799	1426	1849	1808	2453	2514	2320	4859	3639	3760	3215	3602	3591	3775	4691	2590	3845	4112	3877	2980	3741	884	2081	1545	1638	1284	830
220	378.027	6-Thioguanosine monophosphate	223	172	264	167	400	174	323	345	281	340	3860	3393	4376	5182	6789	4120	2444	2547	2687	3059	3723	2654	6092	5445	5572	4895	5218	5332	3622	3227	4223	3641	3324	2973	325	306	343	413	921	320	251	611
221	378.103	Chondroitin	566	443	545	319	321	416	468	425	281	460	1809	2091	1659	1525	1490	2382	1332	1493	1463	1321	2087	1578	2700	2496	5631	5612	4840	4920	1672	1712	2195	2411	2090	1558	718	899	688	461	1833	1787	1438	1203
222	378.241	Sphingosine 1-phosphate	679	435	541	529	277	293	431	482	216	361	6370	6147	5304	5626	5768	4858	5055	4550	5817	5046	5386	6188	7830	6499	6331	6052	5400	6263	6897	6745	5670	6223	6088	6011	893	1139	691	624	1210	930	704	839
223	381.315	7-Dehydrodesmosterol	427	457	564	135	965	348	1545	342	555	172	4711	4881	4664	5798	4200	5104	4648	5191	4770	5339	6091	5900	5762	5056	5035	5468	5475	5029	4295	5372	4625	5416	4590	5441	785	552	467	473	1132	358	785	839
224	383.114	S-Adenosylhomocysteine; S-Lactoylglutathione	360	754	333	335	417	589	595	305	360	304	2324	2129	2051	2136	2019	2588	2068	1639	1973	1549	1575	2397	2568	2145	2597	2416	2653	2652	2285	1861	2075	2159	1942	2670	780	545	755	543	2222	1912	538	556
225	386.017	dCDP	475	491	459	432	250	490	282	392	405	362	47745	53440	33348	36488	38392	38774	28396	29599	34908	36334	24365	24963	14714	14028	12169	12482	10434	11187	20211	22540	14758	15177	13101	10898	383	806	440	443	1380	1113	953	446
226	386.999	dUDP	308	612	537	493	429	311	337	421	514	441	2770	2703	1683	1915	2201	1728	1501	1146	1278	1604	2122	1674	1981	2140	2362	1956	1982	1995	1972	1564	2335	2410	1765	1647	482	655	505	408	941	1266	762	672
227	388.945	Phosphoribosyl pyrophosphate	803	1179	684	1260	638	1344	411	733	305	235	2562	1413	1708	1685	2576	1420	2510	1695	2425	2106	1807	1609	5271	4811	4849	5111	5158	3612	2679	2803	3026	3259	3537	3212	4741	6293	1334	2780	835	1636	765	935
228	389.05	1-Phosphatidyl-D-myo-inositol	389	335	413	234	442	218	395	284	156	313	3441	2226	2182	2671	2416	3172	1638	1583	1610	2036	2321	2137	8860	7296	8582	7985	8044	8166	5953	5262	6487	5598	6493	6851	753	419	372	320	978	623	518	336
229	391.285	Chenodeoxycholic acid	750	556	564	631	708	455	463	418	445	299	4680	3681	3288	4440	3838	3797	8188	9020	5718	3798	4535	4273	3128	2982	2291	3110	4690	5221	4744	3413	4257	2743	3484	3429	801	1095	1079	805	8294	6437	4773	4214
230	392.042	6-Methylthioguanosine monophosphate	244	314	459	67	343	121	185	404	172	237	3846	4636	3420	2644	3425	4198	3020	2375	3588	2873	2662	2900	3321	3032	2679	2604	1929	2091	3170	3515	2588	2630	2075	2297	391	430	158	410	934	526	218	269
231	393.24	LPA(P-16:0e/0:0)	277	278	273	254	217	252	314	557	270	191	11538	11413	9095	9143	9783	9228	9840	9121	9574	10237	10875	9653	10521	11561	8926	7830	8038	8960	10144	12914	9040	10137	11642	9877	317	405	453	574	2091	913	726	678
232	398.328	L-Palmitoylcarnitine	373	194	210	254	272	349	256	208	451	177	2417	2481	2201	2262	2222	1848	1849	2171	2527	2013	2352	2149	3215	2749	2659	1976	2214	2097	2199	3011	3636	2774	2133	2934	161	282	257	285	1044	1262	688	678
233	402.01	CDP	1406	2327	1608	1337	1484	985	1081	1982	1068	860	25159	23850	26254	24939	26470	27789	15515	14970	15698	14087	18972	18900	32914	30431	30274	30398	27678	29536	23552	23021	23545	24283	24084	24839	6697	6196	2319	2556	7118	6044	3554	2715
234	402.995	UDP	4438	5002	2853	4447	2125	3159	3691	4884	1938	3061	73783	68111	75430	71257	74158	71207	46271	41673	39764	39484	60482	55514	110065	102799	99513	97698	100266	93157	66379	72485	78035	74715	78461	76995	11435	12927	5057	6297	23368	21030	8515	8768
235	407.281	Cholate	474	512	554	496	652	504	505	470	509	327	3351	4005	2497	3427	2842	3000	2674	2748	4153	2983	2489	2863	2303	3004	2350	2945	2269	2531	2812	3203	3121	3302	2987	3104	650	726	527	482	2170	1687	1628	956
236	409.236	LPA(0:0/16:0)	417	369	324	311	524	278	524	438	807	453	12463	13214	15301	12200	13085	13985	19731	19255	16949	17026	15479	14115	10037	9782	9731	9760	10744	9548	17939	19364	17334	16060	16590	16878	1161	906	710	410	1562	1157	435	783
237	426.022	ADP	19002	20131	12102	16530	12001	11956	9615	11902	8511	11269	227838	204544	229420	221348	225488	221587	151866	136748	135475	129821	212550	193087	344704	308595	310809	294089	300641	299540	209792	201490	239447	216266	236135	232005	61904	62023	24054	29253	133006	118640	44158	48608
238	433.332	3a,7a,12a-Trihydroxy-5b-cholestan-26-al	1534	1349	5067	1653	6009	1271	6368	2122	3340	1825	3646	3990	3864	3789	3637	3499	3651	5148	4272	3863	3705	3441	4760	3998	4423	3681	5290	3695	4476	4447	5654	4340	4000	4456	4850	2004	2753	1896	5856	2340	3592	2548
239	435.252	LPA(0:0/18:1(9Z))	570	159	468	316	351	468	339	293	296	549	12251	11034	10635	10906	11211	10349	15155	15846	13797	14679	11152	10769	8769	8651	8088	8685	7623	8628	12545	11484	12701	11150	12184	12508	695	741	567	665	1627	1066	858	932
240	442.016	GDP	6057	6863	4115	5220	3681	4603	3106	4618	2794	3286	32446	28397	33294	31701	31337	33162	20990	18552	19797	16097	29740	25078	47118	41018	40437	43755	41445	39918	27981	28546	33428	30079	33948	30986	16551	17246	5707	8590	12572	12660	5237	6473
241	445.053	CDP-ethanolamine	281	266	742	479	616	570	446	724	538	262	1316	1873	1931	1436	1694	1749	1117	2047	1539	1566	1525	1271	2542	2381	2193	2630	2321	2632	5813	4781	6032	6435	5249	6043	541	638	428	512	6447	4230	2543	2011
242	445.187	Estrone glucuronide	4405	4557	5600	6050	5628	5470	5775	4613	4847	5809	227732	241435	295775	312171	165646	170217	163709	170523	171699	169334	248877	247822	203280	198666	100929	106795	304698	306095	116676	123475	161354	166070	138519	132489	8869	5547	7597	6520	6090	4897	5542	6340
243	448.307	Chenodeoxycholic acid glycine conjugate	309	367	382	298	489	279	480	272	341	332	6183	6017	5667	5256	4815	4161	5473	4163	5052	5898	5223	4992	7605	6994	5941	6103	6263	6359	5887	7140	6325	5614	7013	6549	424	603	466	461	667	322	509	239
244	449.325	3a,7a,12a-Trihydroxy-5b-cholestanoic acid	758	1011	1046	777	499	622	787	808	707	680	4000	2690	3526	3872	3011	4418	2966	3601	3344	2688	3433	3853	2776	3231	2540	3146	3598	3589	3676	3813	3522	3442	3349	3682	1740	577	733	609	1513	1212	1213	1125
245	465.249	Androsterone glucuronide	422	368	425	555	411	316	212	374	534	585	3621	3705	3442	3244	2926	3326	3300	3667	3969	3747	4284	3218	4899	4081	3522	3880	3924	3538	4474	3889	4964	3826	4389	4066	606	554	506	360	852	844	410	819
246	465.305	Cholesterol sulfate; Cholylglycine	1373	1271	1259	835	997	1678	1896	712	1266	1648	30227	34241	29511	29916	22854	24691	21818	23296	30865	31664	26585	28112	16787	15462	17290	19047	16601	15622	21388	19417	18962	17145	14759	16956	1765	1706	1137	1648	43105	26496	12287	9170
247	466.966	dUTP	526	408	458	254	373	390	373	464	737	434	3593	3016	2665	2317	2516	3652	2252	2216	2180	3358	2707	2746	4503	4832	4870	4459	3278	3740	3475	3357	4196	3117	2831	2948	603	538	595	144	1058	482	869	782
248	475.233	Retinoyl b-glucuronide	397	239	245	306	556	275	320	369	275	270	12573	11992	10496	12440	9635	10415	8367	8701	7872	8144	11964	10118	9730	8473	7444	8041	8704	9189	6861	8467	8484	7950	8742	7921	1254	891	861	635	4080	3490	2680	2658
249	480.31	LysoPC(15:0)	834	450	614	523	854	496	783	620	373	344	14839	15884	17272	16526	15930	13889	14069	15327	14739	12779	17009	17726	14929	15355	15052	14876	13028	13443	13560	14491	16128	14773	16007	15097	1225	729	380	297	6158	3939	2623	1508
250	480.982	dTTP	869	726	673	731	499	611	462	595	901	886	4739	4748	5192	4253	5010	4576	3171	2620	3044	2975	3748	2782	7286	7085	6747	5936	5866	6856	4135	3192	5222	4107	4835	5547	1412	1164	1026	763	1644	1647	843	808
251	481.977	CTP	397	747	327	752	294	548	568	509	488	560	30785	30258	30477	30634	35122	31327	22437	20471	20854	18062	28083	23693	60218	54268	53601	50853	57704	51093	42815	40712	46509	40599	52494	48329	11701	13187	5068	5091	7028	7607	3574	3039
252	482.961	UTP	1896	1238	1557	1840	1415	1169	1428	824	1228	1270	82812	74328	76044	73142	82994	79898	60247	55540	53032	46702	67779	68143	155024	141859	137208	139321	150310	138644	107163	103237	113625	108806	128031	124926	23619	24112	10301	11510	39118	34108	14961	15178
253	487.1	Chondroitin 4-sulfate; CDP-choline	468	302	669	240	436	604	488	502	452	298	1707	1755	1811	1188	1837	1759	1707	1222	1561	1345	1713	1463	3338	2487	2328	2615	2816	2593	4579	4250	4895	3555	3453	4353	305	478	457	472	6404	4212	2503	1995
254	489.993	dATP	411	599	537	184	485	199	339	489	440	383	7399	7218	6783	6390	8057	6704	4636	3808	6064	5244	5994	5415	6772	6067	6542	5441	5496	4942	7949	6032	6896	5078	5079	5992	1541	1418	558	547	2809	2319	939	710
255	494.324	LysoPC(16:0)	406	386	207	83	222	163	139	284	272	345	5534	6052	5282	5999	5742	5374	5027	5719	5882	5740	5645	6081	6845	4993	4768	4756	6777	4149	5816	5782	6047	6228	5787	6317	614	555	306	176	1134	1270	625	692
256	503.162	Trisaccharide	1065	700	983	1455	2188	1034	1467	1717	1599	1093	1824	2026	2184	2468	2153	2680	2315	1550	1835	1789	1772	2044	2569	3155	2759	2552	2683	2796	2935	2132	3242	2467	2337	2474	1231	1651	1324	1204	2563	2703	1859	1719
257	514.285	Taurocholic acid	219	246	224	470	454	348	49	176	321	326	4659	3513	3176	3423	3932	3515	3267	4373	3449	4333	5053	4537	3928	3564	3395	3713	3139	3631	4916	3001	4577	3681	5868	3898	800	517	323	166	1042	1154	861	357
258	518.327	LysoPC(18:2(9Z,12Z))	378	214	278	112	194	237	172	370	265	186	10474	9918	9461	9933	9399	8908	9700	9390	9593	8698	10648	10222	12939	12266	10982	11371	9975	9197	10996	9576	11509	10857	12298	11369	822	456	189	335	871	621	525	225
259	520.341	LysoPC(18:1(9Z))	219	232	147	220	428	183	247	469	441	429	9223	10742	8110	7807	7097	9303	5879	6890	8125	7685	8359	7492	9119	8361	5451	6008	6214	6835	8596	9660	8638	8550	7093	8846	404	421	269	265	702	343	241	560
260	521.983	GTP	1146	1860	937	1301	545	654	893	790	678	1058	54311	48836	50958	44474	55662	49871	41852	36535	34625	29439	46181	45435	97017	80356	80382	78959	86110	77282	56628	59665	71590	61741	79205	69101	36353	36545	11728	14190	16003	17146	7987	7622
261	522.355	LysoPC(18:0)	96	240	392	250	278	120	167	421	107	259	6184	7558	5874	6226	6148	6199	5709	5572	6155	5255	6274	6236	6586	6399	5252	5098	5444	5771	6121	6386	5657	5920	5657	7295	333	351	554	275	714	771	332	271
262	535.038	UDP-pentose	252	246	344	502	479	191	230	302	270	487	4530	3492	3419	3977	3627	2874	2213	2402	2030	1756	2704	7034	4575	9262	8160	4776	4805	4926	5144	4841	4361	7463	6681	5809	358	355	407	431	2259	2087	662	952
263	536.505	C16 Cer	513	339	558	469	247	405	389	561	244	166	4738	5627	4268	3783	3610	3207	3956	4315	3850	4024	3866	4334	5825	4865	6563	8679	5473	5455	6695	8119	5293	5532	9193	10339	537	418	304	355	3718	1814	1271	702
264	558.064	ADP-ribose	496	328	325	509	567	242	425	536	316	259	2841	2719	2595	2680	1790	2183	1496	2487	2193	1573	4782	5244	1967	2512	2271	3086	1409	2687	1815	1694	2086	2177	1868	2208	467	578	398	878	4641	3114	1465	1828
265	563.069	dTDP-hexose	141	397	286	294	482	433	371	354	431	228	5491	5625	5195	4518	5993	5375	3485	3671	3192	3496	4953	4618	14273	14818	13799	14676	12038	15836	9696	10251	11520	11174	11471	11121	486	770	295	170	4069	3817	1252	1575
266	564.536	C18 Cer	548	183	164	312	268	325	384	438	170	353	2464	1324	3029	2574	1754	1734	1824	2116	2751	2530	1809	1893	2066	1296	1893	1771	1682	1226	2257	2625	2104	2152	2007	1915	318	336	253	267	911	553	473	616
267	565.048	UDP-hexose	2042	1549	1659	1716	1737	1531	1450	1926	1765	1661	61762	58778	64588	62920	63128	70737	51052	51531	50040	45166	74495	73996	162472	156700	151253	154105	160219	161411	111605	116324	123622	120446	135111	144993	4996	5917	3040	2901	44776	30674	15795	15099
268	574.388	LysoPC(22:2(13Z,16Z))	351	183	154	200	198	357	178	192	253	282	14499	13093	12306	10726	11977	10387	10346	11468	11842	13444	13124	12911	11984	11075	9189	9741	10251	8255	11319	10845	10967	10682	11156	11401	543	384	230	509	638	700	712	546
269	579.027	Uridine diphosphate glucuronic acid	367	300	606	194	338	753	347	450	455	509	76803	72264	77371	77706	78395	77274	53062	55204	54216	50103	79507	79473	116611	111798	110297	108835	118067	120086	71604	71298	81570	82512	92821	93761	3350	2188	2487	1818	27219	21371	9101	9321
270	583.256	Bilirubin	221	245	402	407	457	275	372	307	411	361	1598	1266	1971	1372	1550	1411	1503	2225	1380	1016	1672	1651	1319	1509	1370	1361	1937	1258	1357	1482	1835	892	1635	1532	422	569	458	101	1253	924	941	488
271	588.075	GDP-L-fucose	313	408	280	420	389	241	271	140	375	268	3828	3474	3571	3395	2852	2358	2203	3104	2370	2395	3044	3897	8708	7016	8603	8278	7393	7839	5459	5355	6136	5834	5903	5865	675	413	612	590	3364	2212	1482	1066
272	604.07	GDP-hexose	190	407	305	262	401	224	156	213	423	639	3591	2762	3378	3268	3504	3469	2549	2257	2498	2106	2940	3462	8634	7807	7942	7902	7555	8053	7257	6641	7489	6676	7183	8877	699	976	415	455	2953	2069	1289	958
273	606.074	UDP-acetyl-hexosamine	2286	2703	3058	1716	2974	2091	2137	2361	3157	2114	84402	84707	95581	97767	95801	94962	72163	73899	68553	67341	100982	97522	269556	252896	266749	259622	264405	277717	191406	199007	234079	225595	246283	250679	7906	6185	6538	5191	96223	71663	38469	33694
274	611.145	Oxidized glutathione	4579	7232	4109	5049	4204	4464	3897	3616	2689	4533	53175	50420	63792	63048	57763	59093	41125	44784	40229	38808	65466	61292	51641	51235	48024	49462	49435	46918	40097	41567	45352	43531	48741	49547	8777	10206	5534	6508	15644	14558	8882	9201
275	613.14	Cytidine monophosphate N-acetylneuraminic acid	1156	1583	769	695	712	665	779	676	674	194	15848	16423	17480	16820	18640	17419	12655	11031	9847	9452	18280	16436	18247	17361	16090	17679	17421	16626	13368	12281	15129	15685	13710	17698	1734	1779	1657	1581	14885	10161	6339	5182
276	634.444	PE(14:0/14:0)	139	237	230	548	253	336	274	343	300	462	5707	5760	3661	4321	4175	4862	3459	3919	4892	3930	6790	4705	4954	5067	4016	4230	5631	4792	5245	4438	5880	4010	5851	5758	383	277	251	282	579	689	671	549
277	642.962	Phosphatidylinositol-3,4,5-trisphosphate	429	416	438	273	352	204	272	351	393	403	2129	2107	2221	1285	1630	1325	1526	1662	1619	1873	2165	2431	3728	3391	3904	3595	4097	3501	2372	1628	3125	2120	3077	3367	351	349	411	576	1441	966	422	533
278	645.495	SM(d18:1/12:0)	273	517	274	621	394	218	345	194	573	399	5897	6075	5156	5518	5419	4635	3889	4012	4768	4378	4982	5276	5939	4535	4262	4961	4111	3875	5722	5848	5234	4156	4659	5250	334	340	406	332	697	565	435	432
279	646.614	C24:1 Cer	248	211	384	174	359	236	405	182	274	328	1047	1218	875	693	1106	1105	1010	598	830	577	969	805	1360	1324	1202	1372	1141	1241	1438	1480	953	912	1483	1951	461	130	558	247	1259	641	844	737
280	647.468	PA(16:0/16:0)	437	491	445	558	533	318	390	365	755	462	6298	5984	3254	3880	4101	3995	3438	3448	3907	3827	3800	4124	5080	5999	4410	4324	4295	4910	4265	4885	5972	4453	5113	4188	840	268	281	373	1355	771	486	653
281	648.631	C24 Cer	540	329	174	311	408	272	579	300	248	328	971	1022	841	641	856	776	742	590	450	889	878	633	828	1378	1145	1673	894	1301	1341	1048	1173	1074	1298	2017	632	508	371	474	687	657	498	537
282	664.117	NADH (red)	362	220	239	398	96	235	259	222	314	364	25458	28166	26832	28881	29114	24913	14672	15166	13240	15118	22002	20926	35630	32743	33458	33476	38710	35630	24768	24239	25453	24633	26496	27329	1492	1372	489	419	5517	3730	1070	1805
283	665.215	Stachyose	1018	685	1358	997	1654	1053	1579	1086	1143	1111	1270	1566	1346	873	1974	1116	1971	1578	1302	1601	1300	1108	1890	1660	1176	1725	1517	1734	1345	1821	1292	1570	1756	1521	2361	735	1439	1375	2666	2063	1671	1873
284	671.465	PA(16:0/18:2(9Z,12Z))	885	711	793	616	467	475	405	590	817	480	9504	9214	9705	8473	8068	8653	8387	7456	6919	7918	8983	9644	10718	9504	8127	8390	8071	9265	8336	9416	8838	8681	9045	8981	466	590	718	576	2947	1778	1507	928
285	672.497	PE(14:0/P-18:1(11Z))	1396	524	1007	632	898	333	418	446	647	743	12497	11291	9168	9990	9550	9596	7850	9028	8427	9778	10760	8906	13625	10551	9936	10758	10705	10665	13624	12537	10471	9367	13640	11634	896	412	490	418	9947	6414	4479	3350
286	680.43	PE(14:1(9Z)/18:4(6Z,9Z,12Z,15Z))	279	277	538	228	300	232	161	223	429	577	3844	3600	3498	3896	3365	3267	2673	3042	4312	3431	4149	3137	4354	3635	4090	2637	3998	3969	3169	3872	3777	3108	4463	3392	450	514	291	324	905	418	395	333
287	686.477	PE(14:0/18:2(9Z,12Z))	425	317	335	323	235	180	434	241	364	318	8819	9587	7671	8349	8061	8815	6431	7096	7371	8074	9247	8517	11953	12571	10526	10693	10231	9905	9584	10302	9542	9015	10245	10519	729	372	372	245	3179	2705	1945	773
288	688.492	PC(14:1(9Z)/15:0)	1112	598	780	572	935	651	1603	706	882	747	18355	16849	13820	13255	11987	12983	9730	8694	10184	9593	12220	10465	25458	25034	22506	23185	20635	19475	20169	21207	17770	15519	23839	20591	1142	564	288	434	9871	6743	4497	2925
289	694.481	PE(18:4(6Z,9Z,12Z,15Z)/P-16:0)	179	285	311	287	454	271	202	227	368	158	9275	9361	6115	7628	7593	8496	8492	7283	7428	7637	8332	8893	10887	11411	9765	9727	7779	9176	9637	9640	10167	9490	9419	9983	682	567	442	337	1352	707	760	646
290	695.577	CE(22:6(4Z,7Z,10Z,13Z,16Z,19Z))	241	392	342	326	456	280	330	424	280	341	2862	2289	1981	1571	1978	2285	2139	1695	1815	2296	2046	2715	2443	2428	1861	2179	2536	2140	2163	1782	1719	2557	2480	2636	598	474	342	394	1208	843	301	387
291	696.498	PE(18:3(6Z,9Z,12Z)/P-16:0)	285	174	374	411	366	243	478	181	291	502	10931	10994	9879	9116	9575	9622	7930	7852	8727	8104	8862	8587	25679	21306	23468	21380	20476	19267	16526	17645	18281	16771	17052	20399	657	495	163	371	3853	2503	1377	856
292	698.478	PE(15:0/18:3(6Z,9Z,12Z))	309	536	218	284	390	153	391	226	201	145	7336	7893	6631	5867	6170	6209	7800	6192	5891	6356	7113	6806	7453	7436	4967	5355	6102	6647	7121	7633	5196	5862	6744	6882	666	519	306	447	1288	772	521	992
293	698.513	PE(16:1(9Z)/P-18:1(11Z))	1129	651	882	514	667	630	530	404	454	517	21117	20139	16618	15973	16122	17770	14267	12568	12991	13358	14369	14265	17492	17537	14455	17152	15092	15567	18316	18731	15420	14694	18044	16919	1442	517	298	853	23870	15497	9617	6645
294	700.528	PE(16:0/P-18:1(11Z))	2632	1685	2130	1567	1391	1085	1598	826	1007	676	27505	28182	19167	19126	18713	17434	13094	12919	16389	13582	13884	14222	31001	28642	29127	27689	26318	25004	33126	33293	20517	17559	38625	36918	1770	1089	586	712	29842	17743	12838	8502
295	710.476	PE(14:0/20:4(5Z,8Z,11Z,14Z))	410	417	191	346	260	220	355	409	141	295	6914	6779	6085	5307	6593	7672	6355	6099	6002	6464	6802	7062	10000	8802	8428	8927	8200	8083	8471	8235	7626	7118	8969	9191	279	334	195	207	2163	1420	763	636
296	712.492	PE(14:0/20:3(5Z,8Z,11Z))	432	354	437	241	493	599	198	386	545	254	9464	10606	7867	8942	8631	9545	6918	7621	8231	7996	10113	9894	15327	12843	10721	10977	12139	11103	11133	11767	11034	11351	11239	12302	568	477	1093	740	5754	3761	2310	1618
297	712.53	PC(14:1(9Z)/P-18:1(11Z))	395	498	401	241	452	465	254	268	279	674	10632	9327	8596	8395	9056	9941	7467	7369	6657	7930	8773	7861	9216	10611	8185	9722	7883	7780	9575	11226	8469	9963	9535	10062	704	530	446	442	1404	1013	925	388
298	714.508	PE(14:0/20:2(11Z,14Z))	1697	963	1039	1065	927	761	947	687	574	607	38466	37639	35146	33963	36244	36101	24815	23663	25828	24779	33598	27977	72128	68097	60548	61557	57539	57457	53630	54022	49955	49013	53430	52203	2968	1740	1265	986	34861	22735	14752	9891
299	716.523	PC(15:0/16:1(9Z))	2756	1494	2067	698	1181	1282	1966	899	1065	1225	38971	37420	24964	26702	27132	27473	17956	18573	19580	17137	19468	16660	72386	64451	70430	69802	62546	61116	69436	68529	48686	42568	82438	78697	2813	1864	985	959	34045	23538	14402	10084
300	720.497	PE(18:4(6Z,9Z,12Z,15Z)/P-18:1(11Z))	819	773	690	471	1344	883	637	667	573	310	111008	102366	85736	87425	96497	91826	73785	67787	75065	72975	90435	88069	68504	65693	63424	62298	62085	59294	55855	56390	55244	47991	55269	55658	2905	1844	930	918	7504	5177	2935	1986
301	722.453	3-O-Sulfogalactosylceramide (d18:1/12:0)	498	227	168	321	464	308	441	469	265	273	3886	5104	3956	3473	4165	4189	4176	3958	4280	3986	4967	4086	4438	5380	3762	3854	3420	3385	4943	4710	4056	3916	3888	4401	242	450	311	272	1007	717	533	484
302	726.544	PE(18:1(11Z)/P-18:1(11Z))	1446	977	1573	739	1085	646	957	835	1091	615	23483	21475	18621	17473	18583	19083	15253	13623	15431	16229	15396	13490	25284	23699	22363	22107	21442	20505	24224	24748	18645	17222	24661	22871	1920	1021	504	701	19031	13880	7083	4801
303	730.54	PC(14:0/18:1(11Z))	642	551	810	549	467	342	758	536	259	523	10882	10092	7915	8805	8021	7068	7384	6798	7522	7224	6579	6846	13766	12099	11628	13975	11267	11365	13621	13171	11845	11111	16496	14197	1484	630	409	397	2519	1887	1042	698
304	732.46	PE(14:1(9Z)/22:6(4Z,7Z,10Z,13Z,16Z,19Z))	308	126	279	203	217	268	406	416	302	326	5353	4783	4532	5088	4540	4890	3766	5440	4266	3551	5099	5071	5363	4870	3999	4187	4689	4669	4106	4615	4373	3717	4541	4811	199	198	455	155	777	398	405	328
305	736.492	PE(14:0/22:5(4Z,7Z,10Z,13Z,16Z))	778	357	360	224	485	314	314	229	231	207	24223	26375	23160	24003	25246	22961	15914	16495	16929	16842	21610	19759	25677	24123	24683	23120	21942	21843	19758	18980	21783	18499	19389	19087	1627	1951	445	470	6693	4858	2222	2035
306	736.528	PC(18:4(6Z,9Z,12Z,15Z)/P-16:0)	322	368	558	398	526	234	396	545	218	457	33579	33957	26498	25486	27501	23820	24741	24933	25889	25948	26296	21912	35682	30622	30624	30150	29183	30050	30719	30757	26219	28468	33552	31183	2710	1517	469	504	5469	3861	3461	1610
307	738.508	PC(15:0/18:4(6Z,9Z,12Z,15Z))	1378	547	461	482	932	298	806	856	693	525	65826	62747	53294	52540	60503	56400	43317	39800	44028	40167	42839	38094	55972	49187	49465	46660	41502	43398	43057	44148	37807	36208	45023	44976	5549	3762	1376	1404	39518	25909	13599	10250
308	740.523	PC(15:0/18:3(6Z,9Z,12Z))	1434	759	1168	536	703	711	763	611	885	445	33846	30226	25243	25357	30264	28665	22594	21650	23287	22909	25318	23845	52194	45124	44486	44538	42990	44312	44670	49047	42507	41267	41079	45242	3173	1601	1391	1322	37719	24510	13424	9983
309	740.56	PE(14:1(9Z)/20:5(5Z,8Z,11Z,14Z,17Z)); PC(16:1(9Z)/P-18:1(11Z))	658	434	341	367	670	432	752	413	404	542	15698	14757	14437	12712	16293	15345	13965	14090	15210	14640	14467	14894	15366	14046	13716	14737	13311	13937	15022	15738	14109	13260	14493	15173	2558	1443	761	762	4242	3213	2126	1887
310	742.539	PC(15:0/18:2(9Z,12Z))	6092	3418	3732	1848	3474	1285	3181	1521	1952	2311	89290	79707	70866	65463	71465	73090	58994	53632	59381	55362	59313	55732	189304	168925	159142	153688	159339	146852	156976	157254	132987	122347	169073	161341	6881	3995	2010	2065	77192	55038	33686	20362
311	742.575	PE(14:0/20:5(5Z,8Z,11Z,14Z,17Z)); PC(16:0/P-18:1(11Z))	2678	1700	3069	1407	2769	1067	5361	1371	1746	1026	32053	27011	19766	17709	22857	22472	18207	17473	18739	17172	18956	18962	27377	27876	28806	28122	27665	26271	28658	27369	25876	23084	34212	32173	6086	4317	1958	1397	39805	26964	16235	12183
312	744.084	NADPH (red)	187	310	180	224	376	161	293	163	194	357	7968	5596	7654	7312	7704	7953	6089	4267	5028	5231	7112	6557	7444	6605	7181	6910	6978	7625	4459	4928	5320	5705	5201	4524	899	563	427	655	1304	697	604	402
313	746.512	PE(O-16:1(1Z)/22:6(4Z,7Z,10Z,13Z,16Z,19Z))	2462	1897	2063	1028	1622	1092	1004	1064	634	1033	107726	97277	92808	90831	97353	94378	57818	61656	66520	62801	85488	82467	183901	166194	164705	159770	148682	139490	141060	135545	119065	111811	147098	140422	6376	3544	1869	1730	55576	38346	20083	13008
314	748.492	PC(14:1(9Z)/20:5(5Z,8Z,11Z,14Z,17Z))	152	384	244	500	391	324	712	227	160	407	8146	7047	7094	6225	7747	6535	5509	5313	5453	5493	7366	5484	8697	7568	7493	7096	8094	5965	7501	7894	6586	6246	7428	7711	692	545	326	203	1755	1514	856	903
315	748.528	PE(20:4(5Z,8Z,11Z,14Z)/P-18:1(11Z))	3944	2696	2624	1830	3492	1639	2094	1262	2013	1156	170722	158279	134955	133142	146128	138194	130549	128135	128464	125874	136532	126073	321719	284467	278140	279354	266728	248957	260134	256206	232618	206891	273489	255892	15112	9209	4131	3499	105837	71612	39026	25868
316	750.508	PC(14:0/20:5(5Z,8Z,11Z,14Z,17Z))	356	243	403	366	334	325	251	235	389	316	11927	14289	11058	11806	12245	12213	9765	10317	9247	10837	11069	10339	10856	10173	11043	10030	10425	10765	10778	10080	9255	10500	11649	9952	771	604	383	361	1957	1573	665	824
317	750.544	PE(O-18:1(1Z)/20:4(5Z,8Z,11Z,14Z))	7687	4257	6175	2352	4790	2267	4433	2253	3236	2457	173453	150869	129986	121467	141698	138602	111516	108247	115498	109666	109147	108700	236737	204576	204167	204927	195365	190619	188774	181748	157584	148692	199247	197758	17509	9373	4666	3943	113173	78070	43011	27246
318	752.524	PC(14:0/20:4(5Z,8Z,11Z,14Z))	524	403	252	338	269	353	581	540	147	188	19967	18051	16566	14825	16477	18097	13759	15428	15185	14661	14417	15270	15326	13538	12066	13139	12168	11672	13913	13563	12126	11311	13112	13539	1704	1309	569	643	4026	2496	1557	1758
319	760.493	PE(16:1(9Z)/22:6(4Z,7Z,10Z,13Z,16Z,19Z))	366	298	409	129	210	269	349	124	156	327	7520	9979	8184	8898	8381	8125	6080	6610	6580	6388	7665	7470	13263	10040	11455	10924	11945	9446	11460	10169	12284	10238	11027	10211	649	573	622	500	4074	2433	1631	926
320	762.508	PE(16:0/22:6(4Z,7Z,10Z,13Z,16Z,19Z))	731	906	1055	604	558	661	446	426	697	272	48239	47494	44131	44950	47949	45752	34812	33394	37409	34466	47574	47544	57419	50746	57331	56386	51890	47414	46658	46639	46603	43019	52408	49573	4496	1940	940	725	48231	31681	14870	9337
321	764.523	PC(15:0/20:5(5Z,8Z,11Z,14Z,17Z))	2763	1168	1462	1081	1522	999	927	1170	955	965	185916	170872	156182	149468	177736	172682	140544	143839	144190	133821	147542	141930	154705	141746	142992	142806	131445	123692	130992	130254	135023	118451	133339	129119	15933	9285	3416	3857	66696	44369	24583	17444
322	774.507	PC(14:1(9Z)/22:6(4Z,7Z,10Z,13Z,16Z,19Z))	418	186	447	381	281	526	78	96	370	179	5824	6937	5130	5664	5518	4525	4906	4890	4412	5839	6314	4920	7899	7184	7429	7373	7174	7150	6954	6247	6598	6287	7230	7001	568	590	475	379	1275	936	523	893
323	776.524	PC(14:0/22:6(4Z,7Z,10Z,13Z,16Z,19Z))	460	317	670	365	342	323	388	370	261	302	10229	9208	7191	7386	8308	8817	6125	6825	7186	7009	8077	7973	12723	12138	9285	10949	10137	8780	9652	10721	11535	10154	11490	10737	900	607	556	349	2706	2517	919	1044
324	776.56	PE(22:4(7Z,10Z,13Z,16Z)/P-18:1(11Z))	3939	2386	2461	1844	2373	1293	3698	1701	2041	1270	70864	65777	66193	57814	70817	64777	50041	48919	52121	51695	60245	54591	113276	103197	110779	105426	99503	92580	97243	95716	84543	76556	101999	102845	9336	6438	3106	2585	93209	65327	33425	21222
325	778.539	PC(14:0/22:5(4Z,7Z,10Z,13Z,16Z))	300	200	632	346	203	307	459	303	351	475	13483	12451	11499	10923	13249	11452	9125	9651	9766	11389	9912	10623	14645	13986	12512	13500	13057	12810	14464	13191	14402	10471	13711	14485	1199	925	618	391	3008	2350	1670	784
326	784.149	FAD (ox)	133	349	239	209	211	164	227	286	186	425	6594	4634	5926	6597	6220	5907	5074	5811	4747	4490	6523	6632	5395	4423	6136	6136	5708	5417	3838	4264	3724	4502	4141	3755	685	712	507	314	2475	2487	1306	1147
327	784.587	PC(18:1(9Z)/18:1(9Z))	1342	412	949	495	952	919	1491	731	950	406	22342	20271	17721	16408	21466	19345	16276	14972	16545	15418	18257	16640	25059	22574	22267	21176	22325	21426	20532	19126	17965	17300	22511	20618	4185	2790	894	1146	7075	5146	3272	2320
328	786.509	PE(18:2(9Z,12Z)/22:6(4Z,7Z,10Z,13Z,16Z,19Z))	288	419	407	202	419	408	208	429	438	487	10911	10589	10319	9917	10089	8759	8493	9694	9696	9396	10627	9453	12205	13831	12278	10769	10990	10933	13052	11397	13843	11852	13206	13553	1398	874	576	507	15839	11829	4973	3170
329	786.602	PC(14:0/22:1(13Z))	826	606	563	496	468	349	1032	366	510	347	11251	9755	8849	8381	8956	7403	8416	7530	7044	7294	8339	7198	7982	6994	7373	7394	7378	6868	7873	7127	6632	5942	8117	7622	2800	1980	1266	784	2810	2578	1602	1614
330	788.524	PE(18:1(11Z)/22:6(4Z,7Z,10Z,13Z,16Z,19Z))	1643	1201	972	843	966	509	710	826	795	579	27975	25497	25951	25298	27338	24474	20905	15962	17692	17211	26987	23393	68894	61186	62415	62844	59340	58232	52487	50391	53881	49547	52536	51158	3631	2255	673	1502	29190	20636	11357	7046
331	788.544	PS(18:0/18:1(9Z))	6401	3662	5047	1774	3931	2068	2876	2059	3487	1838	89429	82507	64619	64080	56650	58096	46779	43547	44502	37756	54037	52719	111573	104294	127898	125049	100896	99844	128550	128181	95689	91333	162351	159706	8380	3987	2960	2354	59691	37421	21537	17452
332	790.538	PC(15:0/22:6(4Z,7Z,10Z,13Z,16Z,19Z))	3089	1744	1590	1300	1621	992	915	899	1420	684	31743	31135	25285	25571	26201	27977	22804	18377	22593	20020	25433	24152	93168	88835	88537	88556	82951	76265	86191	84566	66578	67007	91536	85186	4727	2438	1342	1149	54936	38448	19961	10955
333	802.538	PC(16:1(9Z)/22:6(4Z,7Z,10Z,13Z,16Z,19Z))	291	435	214	200	434	310	474	383	178	361	11600	11929	12040	12679	9443	10813	8877	12823	12099	11648	12012	13383	12304	10728	10027	11653	9872	9941	9287	10317	10894	9390	10555	10741	1083	363	331	335	1967	1560	871	968
334	810.528	PS(18:0/20:4(8Z,11Z,14Z,17Z))	1873	588	1329	857	930	257	1065	542	566	802	128399	114493	89418	83619	88341	85645	95607	91154	92025	89546	86603	78065	32685	28094	33948	31601	28079	27611	46215	41155	37102	31261	42775	41471	13752	8115	3005	2029	47499	31159	19998	12389
335	814.634	PC(14:0/24:1(15Z))	645	295	447	412	117	79	550	514	495	193	4283	4153	3409	3242	3089	4044	3098	2721	3901	3304	3821	3216	5136	4159	3453	3693	3763	3926	3515	4195	3249	3411	4210	4273	1187	935	460	559	1257	1095	519	520
336	818.591	PS(18:0/20:0)	737	280	816	631	677	433	696	294	526	373	300569	302969	251383	256331	243580	256022	179816	179859	191951	198505	242451	240751	356064	357596	342916	349287	319660	333749	274127	293860	278128	274753	294462	299758	2228	989	628	478	6104	4110	2476	1839
337	826.672	PC(22:0/P-18:1(11Z))	501	533	772	471	641	328	958	500	544	397	4721	5395	4084	4810	4690	4496	3112	3614	3698	3539	4041	3423	6055	5700	5573	5816	4750	5468	5508	5624	4706	4676	6133	6692	1015	546	543	559	4268	3220	2211	1395
338	842.569	PE(22:2(13Z,16Z)/22:6(4Z,7Z,10Z,13Z,16Z,19Z))	345	478	675	388	380	217	434	498	449	278	17201	18960	15593	17418	16821	18128	15087	14637	15202	14698	15913	16264	18069	16884	16229	15186	14923	14410	14770	16025	15922	15698	16898	14667	2299	1334	607	695	12377	7219	4611	2750
339	848.617	PE(20:4(5Z,8Z,11Z,14Z)/24:1(15Z))	1186	731	603	286	896	517	600	586	535	361	22050	21115	18594	16470	22201	19879	17263	17056	15793	17224	18886	18436	32927	29498	28035	29486	28327	25985	24933	24143	22445	21311	23901	23792	3513	1653	807	1010	28584	22575	11673	8381
340	852.685	PC(24:1(15Z)/P-18:1(11Z))	1393	565	896	725	1068	826	1307	620	383	332	5633	5135	4456	3902	5219	4788	3542	3409	3843	3717	3234	3462	4513	5046	4582	4370	3810	3453	5090	3646	4416	4313	5078	5103	1680	1491	515	542	7526	6735	4108	2535
341	854.7	PC(24:0/P-18:1(11Z))	659	142	816	501	503	388	627	509	320	404	3017	2702	1614	1921	2510	2257	1955	1724	2070	1703	2316	2365	3037	2527	3338	2488	2184	1948	2928	2352	2419	2723	2074	2721	626	429	520	375	2299	2458	1202	975
342	856.586	PC(20:2(11Z,14Z)/22:6(4Z,7Z,10Z,13Z,16Z,19Z))	515	178	560	364	343	350	314	328	273	421	7806	7243	7060	7107	8000	7405	6492	6101	6093	6370	8589	7987	10051	8777	9563	9806	8974	8782	8634	8554	8043	7949	8847	8835	1045	523	492	450	3061	2306	1046	752
343	888.65	PC(20:5(5Z,8Z,11Z,14Z,17Z)/24:1(15Z))	328	294	154	323	106	273	307	351	212	262	6246	5880	5560	5531	5762	6739	4378	4656	4354	6403	5357	6305	6904	8624	5846	6179	6197	5849	5363	6242	6142	5453	6129	6421	401	511	518	394	1576	1160	683	530
344	972.737	Galabiosylceramide (d18:1/24:0)	199	153	292	398	303	200	186	151	278	278	3377	3236	2443	2581	2698	3228	2722	2133	2206	2471	2678	2639	4277	4618	4413	3440	3561	3845	3372	4567	3879	3547	3432	4450	402	451	229	181	503	428	538	174
345	974.292	(2E)-Tetradecenoyl-CoA	556	247	452	351	457	196	142	259	219	179	678	780	872	576	489	702	627	864	667	610	841	685	1418	1339	1819	1386	1492	698	1012	1283	1443	1845	1083	1151	87	218	285	279	689	376	235	179
