# Supplementary material for: Targeting lactate dehydrogenase B-dependent mitochondrial metabolism affects tumor initiating cells and inhibits tumorigenesis of non-small cell lung cancer by inducing mtDNA damage
Source: Cell Mol Life Sci. 2022 Jul 25;79(8):445. doi: 10.1007/s00018-022-04453-5 (PMC9314287; doi:10.1007/s00018-022-04453-5)
Supplement: Supplementary file 4 — Supplementary file4 (XLSX 14005 KB) [file 18_2022_4453_MOESM4_ESM.xlsx]

## Sheet: A549
gene_id	gene_symbol	entrezgene	chromosome_name	normMean.A549_CTR	normMean.A549_KD	log2FoldChange	lfcSE	stat	pvalue	padj	spacer	A549_CTR1_.norm	A549_CTR2_.norm	A549_CTR3_.norm	A549_KD1_.norm	A549_KD2_.norm	A549_KD3_.norm
ENSG00000019582	CD74	972	5	4.084	526.303	-6.87767	0.415967	-16.5342	2.08235e-61	9.9719e-60		5.33	4.52	2.41	502.15	553.11	523.66
ENSG00000186847	KRT14	3861	17	0	66.604	-6.36884	0.757975	-8.40244	4.37281e-17	4.73173e-16		0	0	0	63.52	80.97	55.32
ENSG00000239713	APOBEC3G	60489	22	1.534	145.446	-6.24721	0.637327	-9.80221	1.1015e-22	1.5673e-21		1.07	1.13	2.41	154.27	135.79	146.28
ENSG00000104112	SCG3	29106	15	3.043	250.674	-6.2451	0.494799	-12.6215	1.60745e-36	3.86755e-35		2.13	3.39	3.61	267.21	222.99	261.83
ENSG00000272395	IFNL4	101180976	19	2.884	192.816	-5.98434	0.556522	-10.7531	5.73054e-27	9.79812e-26		6.39	2.26	0	193.6	193.09	191.76
ENSG00000183709	IFNL2	282616	19	52.726	3283.28	-5.95395	0.149481	-39.8308	0	0		66.07	45.15	46.96	3136.9	3531.66	3181.27
ENSG00000131401	NAPSB	256236	19	2.6	163.018	-5.86971	0.559904	-10.4834	1.02953e-25	1.68357e-24		4.26	1.13	2.41	162.34	165.68	161.03
ENSG00000102970	CCL17	6361	16	0	33.03	-5.74148	0.920877	-6.2348	4.5237e-10	3.02778e-09		0	0	0	32.27	33.63	33.19
ENSG00000233887			X	1.179	69.592	-5.73641	0.803422	-7.13997	9.3349e-13	7.63254e-12		0	1.13	2.41	61.51	74.74	72.53
ENSG00000149131	SERPING1	710	11	25.315	1257.84	-5.62472	0.182266	-30.8599	4.12896e-209	9.92474e-207		21.31	29.35	25.28	1263.43	1205.87	1304.22
ENSG00000276462		440896	9	0	25.847	-5.4875	0.944372	-5.81074	6.2197e-09	3.7844e-08		0	0	0	23.19	19.93	34.42
ENSG00000181143	MUC16	94025	19	4.857	344.885	-5.44606	0.621872	-8.75752	1.99585e-18	2.32862e-17		4.26	7.9	2.41	321.66	281.54	431.46
ENSG00000105675	ATP4A	495	19	0.753	51.598	-5.43374	0.759723	-7.15226	8.53608e-13	6.99789e-12		0	2.26	0	54.45	58.55	41.79
ENSG00000154451	GBP5	115362	1	5.601	263.738	-5.43238	0.391107	-13.8898	7.30774e-44	2.19836e-42		8.53	2.26	6.02	244.01	292.75	254.45
ENSG00000197110	IFNL3	282617	19	57.333	2468.16	-5.42381	0.15042	-36.0578	1.04041e-284	4.59971e-282		63.94	58.7	49.36	2374.61	2679.57	2350.31
ENSG00000102524	TNFSF13B	10673	13	13.225	586.122	-5.41424	0.317911	-17.0307	4.86598e-65	2.52033e-63		21.31	13.55	4.82	609.03	556.84	592.49
ENSG00000175121	WFDC5	149708	20	0.355	33.956	-5.3949	0.926746	-5.82134	5.83785e-09	3.55994e-08		1.07	0	0	31.26	41.11	29.5
ENSG00000129451	KLK10	5655	19	13.348	561.106	-5.37874	0.250912	-21.4367	6.07185e-102	5.20162e-100		7.46	16.93	15.65	564.66	560.58	558.07
ENSG00000111913	RIPOR2	9750	6	1.53	86.968	-5.36796	0.588986	-9.1139	7.94705e-20	9.95714e-19		0	3.39	1.2	81.67	74.74	104.49
ENSG00000171855	IFNB1	3456	9	25.749	1072.94	-5.36282	0.231236	-23.192	5.488e-119	6.03876e-117		29.84	29.35	18.06	1015.38	1162.27	1041.17
ENSG00000146192	FGD2	221472	6	0	30.501	-5.30115	0.759047	-6.98396	2.86977e-12	2.26345e-11		0	0	0	28.23	43.6	19.67
ENSG00000182393	IFNL1	282618	19	121.533	4734.17	-5.27686	0.114619	-46.0385	0	0		139.6	110.62	114.38	4422.52	5026.54	4753.47
ENSG00000162654	GBP4	115361	1	53.274	1985.31	-5.20195	0.153555	-33.8769	1.45802e-251	4.94489e-249		65	58.7	36.12	1885.57	2069.16	2001.2
ENSG00000128422	KRT17	3872	17	7.532	307.019	-5.18249	0.305847	-16.9447	2.10469e-64	1.07884e-62		8.53	5.64	8.43	282.33	335.1	303.62
ENSG00000115155	OTOF	9381	2	8.577	316.881	-5.12647	0.32477	-15.7849	3.95098e-56	1.64955e-54		12.79	4.52	8.43	329.72	290.26	330.67
ENSG00000121380	BCL2L14	79370	12	1.133	50.691	-5.08609	0.758067	-6.70928	1.95582e-11	1.4563e-10		1.07	1.13	1.2	60.5	46.09	45.48
ENSG00000188282	RUFY4	285180	2	10.885	355.939	-5.06298	0.343414	-14.7431	3.40863e-49	1.21077e-47		12.79	9.03	10.84	361.99	389.91	315.91
ENSG00000128383				0	20.468	-5.06071	0.925023	-5.4709	4.47758e-08	2.51545e-07		0	0	0	18.15	17.44	25.81
ENSG00000070190	DAPP1	27071	4	1.108	62.077	-5.048	0.572631	-8.81546	1.19196e-18	1.40834e-17		1.07	2.26	0	62.52	59.8	63.92
ENSG00000006210	CX3CL1	6376	16	24.04	794.699	-5.02083	0.200058	-25.0969	5.38242e-139	7.40322e-137		22.38	30.48	19.26	821.79	738.72	823.59
ENSG00000124256	ZBP1	81030	20	12.415	407.483	-5.02007	0.271274	-18.5055	1.86369e-76	1.14779e-74		12.79	12.42	12.04	409.38	412.34	400.73
ENSG00000121858	TNFSF10	8743	3	149.994	4721.51	-4.9635	0.105933	-46.8551	0	0		183.29	153.52	113.18	4968.02	4593.02	4603.5
ENSG00000080573	COL5A3	50509	19	8.423	279.071	-4.95164	0.309413	-16.0033	1.21099e-57	5.25073e-56		5.33	7.9	12.04	264.18	293.99	279.04
ENSG00000213088	ACKR1	2532	1	0.753	40.44	-4.94687	0.949807	-5.20829	1.90586e-07	1.00716e-06		0	2.26	0	38.32	48.58	34.42
ENSG00000185885	IFITM1	8519	11	523.563	16020.8	-4.92971	0.0804343	-61.2887	0	0		532.81	559.89	477.99	16238.1	15632.7	16191.5
ENSG00000131203	IDO1	3620	8	113.954	3470.78	-4.9271	0.107097	-46.0058	0	0		111.89	126.43	103.54	3507.96	3415.8	3488.58
ENSG00000225492	GBP1P1	400759	1	2.173	76.942	-4.91689	0.55688	-8.82935	1.05285e-18	1.25019e-17		4.26	2.26	0	73.61	83.46	73.75
ENSG00000276070				0.401	29.714	-4.91241	1.01641	-4.8331	1.34424e-06	6.4761e-06		0	0	1.2	32.27	24.91	31.96
ENSG00000197721	CR1L	1379	1	1.158	41.529	-4.80993	0.783214	-6.14128	8.18615e-10	5.36171e-09		1.07	0	2.41	29.24	52.32	43.02
ENSG00000128284	APOL3	80833	22	39.7	1112.65	-4.80964	0.161049	-29.8645	5.68808e-196	1.23531e-193		30.9	49.67	38.53	1155.54	1058.87	1123.52
ENSG00000078081	LAMP3	27074	3	370.608	10435.3	-4.80578	0.088367	-54.3843	0	0		421.99	398.47	291.37	10690.3	10117.9	10497.7
ENSG00000102962	CCL22	6367	16	1.108	42.83	-4.75137	0.650629	-7.30274	2.81957e-13	2.39557e-12		1.07	2.26	0	39.32	49.83	39.34
ENSG00000198535	C2CD4A	145741	15	0.355	27.539	-4.73925	0.750707	-6.31305	2.73592e-10	1.8573e-09		1.07	0	0	28.23	22.42	31.96
ENSG00000133328	PLAAT2	54979	11	17.105	463.414	-4.72773	0.267613	-17.6663	7.62566e-70	4.27141e-68		12.79	18.06	20.47	493.07	450.96	446.21
ENSG00000184144	CNTN2	6900	1	0.731	32.308	-4.71177	0.92154	-5.11292	3.17209e-07	1.63955e-06		1.07	1.13	0	20.17	41.11	35.65
ENSG00000011590	ZBTB32	27033	19	7.52	199.871	-4.70559	0.41486	-11.3426	8.0712e-30	1.53595e-28		5.33	12.42	4.82	203.68	194.33	201.6
ENSG00000179583	CIITA	4261	16	0.753	36.463	-4.68479	0.660635	-7.09133	1.32826e-12	1.07257e-11		0	2.26	0	25.21	44.85	39.34
ENSG00000129159	KCNC1	3746	11	5.643	151.065	-4.66709	0.399396	-11.6854	1.51432e-31	3.08573e-30		6.39	4.52	6.02	151.25	151.98	149.97
ENSG00000133401	PDZD2	23037	5	19.529	492.243	-4.63748	0.232695	-19.9295	2.25931e-88	1.65982e-86		23.44	14.67	20.47	504.16	482.1	490.47
ENSG00000206337	HCP5	10866	6	42.515	1064.03	-4.62331	0.154961	-29.8354	1.35881e-195	2.92534e-193		45.82	56.44	25.28	1128.32	1012.78	1051
ENSG00000157766	ACAN	176	15	1.868	51.916	-4.61232	0.749328	-6.15527	7.49493e-10	4.92985e-09		3.2	0	2.41	49.41	47.34	59
ENSG00000277200			17	3.661	100.272	-4.57701	0.488982	-9.36028	7.95285e-21	1.0518e-19		6.39	3.39	1.2	108.9	104.64	87.28
ENSG00000103723	AP3B2	8120	15	11.743	281.929	-4.54503	0.291439	-15.5951	7.8555e-55	3.1727e-53		7.46	16.93	10.84	270.23	298.98	276.58
ENSG00000243649	CFB	629	6	36.922	866.609	-4.5255	0.198035	-22.8521	1.3931e-115	1.48665e-113		39.43	31.61	39.73	879.26	900.67	819.9
ENSG00000279727	LINC02033	105377031	3	0.355	19.558	-4.48895	0.894042	-5.02096	5.14129e-07	2.59824e-06		1.07	0	0	19.16	13.7	25.81
ENSG00000136514	RTP4	64108	3	17.159	388.059	-4.48412	0.248126	-18.072	5.299e-73	3.11621e-71		20.25	19.19	12.04	389.21	412.34	362.63
ENSG00000096996	IL12RB1	3594	19	0.401	20.521	-4.46038	0.936401	-4.76332	1.90432e-06	9.04934e-06		0	0	1.2	23.19	19.93	18.44
ENSG00000120645	IQSEC3	440073	12	2.266	55.826	-4.45714	0.621438	-7.17229	7.37525e-13	6.07642e-12		2.13	2.26	2.41	52.43	54.81	60.23
ENSG00000168961	LGALS9	3965	17	172.194	3799.29	-4.45534	0.0993402	-44.8493	0	0		176.89	196.41	143.28	3883.06	3654.98	3859.81
ENSG00000233705	SLC26A4-AS1		7	0.376	19.444	-4.45208	0.899762	-4.94806	7.4956e-07	3.71226e-06		0	1.13	0	21.17	21.18	15.98
ENSG00000232810	TNF	7124	6	1.108	36.965	-4.44926	0.687132	-6.47511	9.47424e-11	6.677e-10		1.07	2.26	0	40.33	37.37	33.19
ENSG00000170454	KRT75	9119	12	0.731	25.837	-4.43949	0.809637	-5.48331	4.17443e-08	2.35048e-07		1.07	1.13	0	29.24	24.91	23.36
ENSG00000165731	RET	5979	10	62.596	1316.25	-4.39232	0.153825	-28.554	2.50891e-179	4.70573e-177		69.27	64.34	54.18	1292.67	1275.63	1380.44
ENSG00000277632	CCL3	6348	17	5.952	127.388	-4.39208	0.480731	-9.13626	6.46504e-20	8.14977e-19		8.53	4.52	4.82	114.95	128.31	138.9
ENSG00000136040	PLXNC1	10154	12	13.079	284.205	-4.37703	0.276441	-15.8335	1.82811e-56	7.73679e-55		15.98	12.42	10.84	277.29	281.54	293.79
ENSG00000169245	CXCL10	3627	4	24.395	513.221	-4.37395	0.235725	-18.5553	7.38718e-77	4.56089e-75		23.44	30.48	19.26	515.25	498.29	526.11
ENSG00000256262	USP30-AS1		12	5.263	112.584	-4.36953	0.472618	-9.24538	2.34405e-20	3.02891e-19		5.33	5.64	4.82	103.86	118.34	115.55
ENSG00000163823	CCR1	1230	3	0	13.829	-4.35915	0.800716	-5.44406	5.20804e-08	2.908e-07		0	0	0	8.07	17.44	15.98
ENSG00000204335	SP5	389058	2	1.154	39.369	-4.35876	0.582508	-7.48274	7.27864e-14	6.46822e-13		0	2.26	1.2	46.38	32.39	39.34
ENSG00000130303	BST2	684	19	338.516	6838.97	-4.33529	0.0706618	-61.3527	0	0		306.9	387.18	321.47	6808.21	6886.42	6822.28
ENSG00000047617	ANO2	57101	12	0.376	19.345	-4.32706	0.733558	-5.89874	3.66297e-09	2.27516e-08		0	1.13	0	17.14	24.91	15.98
ENSG00000137726	FXYD6	53826	11	3.047	65.022	-4.29103	0.585346	-7.33076	2.28854e-13	1.95851e-12		3.2	1.13	4.82	66.55	51.08	77.44
ENSG00000271503	CCL5	6352	17	1213.88	23842	-4.29026	0.0810393	-52.9405	0	0		1196.7	1397.47	1047.47	23823.7	24265.7	23436.7
ENSG00000169248	CXCL11	6373	4	14.943	302.106	-4.28525	0.321113	-13.345	1.26726e-40	3.44022e-39		18.12	14.67	12.04	293.42	333.86	279.04
ENSG00000079385	CEACAM1	634	19	329.617	6450.57	-4.28516	0.0692814	-61.8516	0	0		354.85	333	301	6642.85	6202.51	6506.36
ENSG00000129048	ACKR4	51554	3	2.308	51.117	-4.27305	0.717793	-5.95304	2.63207e-09	1.65477e-08		0	4.52	2.41	60.5	49.83	43.02
ENSG00000196092	PAX5	5079	9	7.541	153.397	-4.25043	0.366264	-11.6048	3.89389e-31	7.80607e-30		4.26	13.55	4.82	137.13	168.17	154.88
ENSG00000137752	CASP1	834	11	30.088	576.718	-4.24508	0.209104	-20.3012	1.25387e-91	9.46441e-90		29.84	32.74	27.69	592.9	573.04	564.22
ENSG00000104327	CALB1	793	8	0.778	25.632	-4.24419	0.699534	-6.06716	1.30191e-09	8.41802e-09		0	1.13	1.2	26.22	21.18	29.5
ENSG00000072952	IRAG1	10335	11	0	12.535	-4.22515	0.815009	-5.18418	2.16971e-07	1.14172e-06		0	0	0	14.12	9.97	13.52
ENSG00000266976		102724908	19	19.002	349.23	-4.19873	0.293268	-14.317	1.71261e-46	5.59377e-45		23.44	20.32	13.24	340.81	376.21	330.67
ENSG00000288076			8	0	10.518	-4.19711	0.897337	-4.6773	2.90679e-06	1.35581e-05		0	0	0	8.07	9.97	13.52
ENSG00000158955	WNT9B	7484	17	0	11.789	-4.19062	0.973346	-4.30538	1.667e-05	7.11949e-05		0	0	0	13.11	9.97	12.29
ENSG00000234745	HLA-B	3106	6	1652.72	29933	-4.17351	0.0722933	-57.7302	0	0		1618.69	1940.43	1399.04	30196.3	29665.9	29936.9
ENSG00000100336	APOL4	80832	22	0	10.633	-4.1707	0.896606	-4.65165	3.29284e-06	1.52581e-05		0	0	0	12.1	9.97	9.83
ENSG00000166143	PPP1R14D	54866	15	1.935	41.345	-4.16109	0.648223	-6.41923	1.36965e-10	9.51986e-10		1.07	1.13	3.61	53.44	39.86	30.73
ENSG00000169876	MUC17	140453	7	1.112	31.436	-4.16032	0.9433	-4.41039	1.03183e-05	4.50433e-05		2.13	0	1.2	25.21	19.93	49.17
ENSG00000119915	ELOVL3	83401	10	10.399	203.669	-4.14285	0.459104	-9.02377	1.81728e-19	2.23398e-18		17.05	4.52	9.63	223.85	181.88	205.28
ENSG00000129221	AIPL1	23746	17	0	11.633	-4.14006	0.994538	-4.1628	3.14374e-05	0.000130177		0	0	0	10.08	17.44	7.38
ENSG00000268510	IFNL3P1		19	4.645	91.103	-4.13564	0.559114	-7.39677	1.39536e-13	1.21386e-12		1.07	5.64	7.22	71.59	102.15	99.57
ENSG00000226025		400696	19	6.345	111.063	-4.10413	0.486618	-8.43399	3.34089e-17	3.63737e-16		6.39	9.03	3.61	112.93	109.62	110.63
ENSG00000272463			6	1.463	33.113	-4.0662	0.839083	-4.846	1.25974e-06	6.08914e-06		2.13	2.26	0	42.35	33.63	23.36
ENSG00000172478	MAB21L4	79919	2	0.753	25.348	-4.06406	0.624493	-6.50777	7.62727e-11	5.40612e-10		0	2.26	0	30.25	23.67	22.13
ENSG00000137198	GMPR	2766	6	37.18	630.492	-4.0512	0.188324	-21.5118	1.20636e-102	1.04431e-100		47.95	39.51	24.08	640.29	636.57	614.62
ENSG00000261963	CCDC92B		17	0.778	21.616	-4.04383	0.736141	-5.49328	3.94544e-08	2.2261e-07		0	1.13	1.2	20.17	32.39	12.29
ENSG00000132274	TRIM22	10346	11	769.866	12738.8	-4.0433	0.0822253	-49.1734	0	0		785.37	850	674.24	12953	12730.2	12533.3
ENSG00000110446	SLC15A3	51296	11	94.844	1522.32	-4.00759	0.135453	-29.5866	2.22023e-192	4.58071e-190		79.92	109.49	95.12	1590.13	1455.02	1521.8
ENSG00000182329	KIAA2012	100652824	2	2.266	40.39	-4.00704	0.733189	-5.46522	4.6233e-08	2.59378e-07		2.13	2.26	2.41	38.32	37.37	45.48
ENSG00000102313	ITIH6	347365	X	3.729	64.304	-3.9855	0.561753	-7.09476	1.2958e-12	1.04704e-11		4.26	4.52	2.41	65.54	57.3	70.07
ENSG00000275302	CCL4	6351	17	0	19.354	-3.98091	0.989743	-4.02217	5.76651e-05	0.000230903		0	0	0	22.18	17.44	18.44
ENSG00000105559	PLEKHA4	57664	19	433.668	6863.38	-3.98053	0.0770108	-51.6879	0	0		428.38	456.04	416.58	6825.36	6944.97	6819.82
ENSG00000157765	SLC34A2	10568	4	0	11.28	-3.95584	0.80725	-4.90039	9.56452e-07	4.68629e-06		0	0	0	9.07	13.7	11.06
ENSG00000204397	CARD16	114769	11	4.038	71.46	-3.94869	0.444144	-8.89058	6.0793e-19	7.27459e-18		6.39	4.52	1.2	80.67	72.25	61.46
ENSG00000106571	GLI3	2737	7	2.198	41.416	-3.94753	0.542637	-7.27472	3.47151e-13	2.92837e-12		4.26	1.13	1.2	30.25	43.6	50.4
ENSG00000081803	CADPS2	93664	7	6.797	110.702	-3.93795	0.339493	-11.5995	4.14529e-31	8.30332e-30		6.39	6.77	7.22	106.88	113.36	111.86
ENSG00000104951	IL4I1	259307	19	54.09	815.126	-3.90299	0.171927	-22.7014	4.33999e-114	4.55295e-112		55.41	58.7	48.16	787.5	900.67	757.21
ENSG00000089472	HEPH	9843	X	0.355	13.198	-3.90097	0.893192	-4.36745	1.25703e-05	5.42754e-05		1.07	0	0	11.09	17.44	11.06
ENSG00000166863	TAC3	6866	12	9.435	140.577	-3.88737	0.412964	-9.41335	4.80584e-21	6.43499e-20		7.46	12.42	8.43	142.17	132.05	147.51
ENSG00000100346	CACNA1I	8911	22	11.591	177.763	-3.88659	0.308461	-12.5999	2.11382e-36	5.06132e-35		13.85	11.29	9.63	185.53	176.89	170.86
ENSG00000222035	KIAA2012-AS1		2	3.022	50.788	-3.88476	0.603444	-6.43765	1.21334e-10	8.47623e-10		3.2	2.26	3.61	48.4	53.57	50.4
ENSG00000108342	CSF3	1440	17	1.463	28.683	-3.87181	0.696986	-5.55508	2.77484e-08	1.591e-07		2.13	2.26	0	29.24	19.93	36.88
ENSG00000204642	HLA-F	3134	6	367.26	5362.45	-3.85967	0.0792127	-48.7254	0	0		418.79	374.77	308.22	5465.12	5506.14	5116.09
ENSG00000167414	GNG8	94235	19	0.401	12.478	-3.82088	0.942622	-4.05346	5.04651e-05	0.000203653		0	0	1.2	15.12	13.7	8.6
ENSG00000224389	C4B	721	6	1.158	23.736	-3.81718	0.67254	-5.67576	1.38071e-08	8.13124e-08		1.07	0	2.41	24.2	22.42	24.58
ENSG00000137709	POU2F3	25833	11	0.731	17.854	-3.80565	0.765865	-4.96908	6.72713e-07	3.34909e-06		1.07	1.13	0	15.12	24.91	13.52
ENSG00000117228	GBP1	2633	1	166.63	2319.51	-3.79097	0.0885803	-42.797	0	0		171.57	186.25	142.07	2332.26	2275.96	2350.31
ENSG00000081479	LRP2	4036	2	4.18	65.1	-3.79062	0.514918	-7.3616	1.81724e-13	1.56983e-12		4.26	2.26	6.02	45.37	89.69	60.23
ENSG00000110324	IL10RA	3587	11	2.219	36.127	-3.78227	0.669184	-5.65207	1.5853e-08	9.28526e-08		3.2	2.26	1.2	24.2	44.85	39.34
ENSG00000155657	TTN	7273	2	0	10.362	-3.77331	0.864039	-4.36706	1.2593e-05	5.43639e-05		0	0	0	5.04	17.44	8.6
ENSG00000186832	KRT16	3868	17	5.643	86.443	-3.76899	0.423926	-8.89066	6.07445e-19	7.27231e-18		6.39	4.52	6.02	73.61	100.9	84.82
ENSG00000158859	ADAMTS4	9507	1	0.731	18.96	-3.76591	0.680663	-5.53271	3.15324e-08	1.79797e-07		1.07	1.13	0	16.13	13.7	27.04
ENSG00000177294	FBXO39	162517	17	0	8.226	-3.7603	0.968198	-3.88381	0.000102832	0.000399047		0	0	0	11.09	4.98	8.6
ENSG00000077522	ACTN2	88	1	1.839	33.09	-3.74412	0.818473	-4.57451	4.77327e-06	2.17276e-05		2.13	3.39	0	26.22	39.86	33.19
ENSG00000163515	RETNLB	84666	3	0.778	16.764	-3.73942	0.741748	-5.04136	4.62225e-07	2.34507e-06		0	1.13	1.2	18.15	13.7	18.44
ENSG00000162896	PIGR	5284	1	1.889	30.659	-3.73247	0.741195	-5.03575	4.75982e-07	2.41186e-06		2.13	1.13	2.41	36.3	27.41	28.27
ENSG00000142089	IFITM3	10410	11	2225.96	29494.3	-3.72411	0.0661795	-56.2728	0	0		2140.84	2507.09	2029.93	28920.8	29552.5	30009.4
ENSG00000010030	ETV7	51513	6	45.35	605.759	-3.71955	0.167736	-22.1751	5.97794e-109	5.804e-107		45.82	55.31	34.92	589.87	604.18	623.22
ENSG00000136689	IL1RN	3557	2	6.413	86.795	-3.71826	0.377222	-9.85696	6.39579e-23	9.21693e-22		4.26	10.16	4.82	95.79	83.46	81.13
ENSG00000215218	UBE2QL1	134111	5	4.95	67.58	-3.70503	0.504703	-7.34102	2.11979e-13	1.82291e-12		2.13	7.9	4.82	66.55	73.5	62.69
ENSG00000152689	RASGRP3	25780	2	135.657	1755.92	-3.69037	0.12433	-29.6822	1.30465e-193	2.73733e-191		133.2	137.72	136.05	1691.97	1758.98	1816.82
ENSG00000104432	IL7	3574	8	3.373	47.78	-3.67615	0.475816	-7.72601	1.10973e-14	1.03639e-13		3.2	4.52	2.41	39.32	57.3	46.71
ENSG00000134716	CYP2J2	1573	1	17.72	227.928	-3.67205	0.242418	-15.1476	7.85862e-52	2.917e-50		15.98	20.32	16.86	225.86	234.2	223.72
ENSG00000108771	DHX58	79132	17	251.764	3208.81	-3.66974	0.0898063	-40.8628	0	0		237.63	272.04	245.61	3159.08	3272.54	3194.79
ENSG00000270240			17	3.733	51.732	-3.66891	0.560312	-6.54799	5.83181e-11	4.16813e-10		5.33	2.26	3.61	57.47	46.09	51.63
ENSG00000134321	RSAD2	91543	2	528.341	6724.93	-3.66501	0.0912763	-40.1529	0	0		536.01	573.44	475.58	6683.18	6830.36	6661.25
ENSG00000128564	VGF	7425	7	98.333	1254.73	-3.65824	0.146473	-24.9756	1.12592e-137	1.53162e-135		93.78	106.11	95.12	1110.17	1400.21	1253.82
ENSG00000250508	LINC02701	105369364	11	10.254	134.717	-3.65795	0.336941	-10.8563	1.86074e-27	3.2374e-26		5.33	15.8	9.63	129.07	165.68	109.4
ENSG00000182179	UBA7	7318	3	184.745	2323.41	-3.64963	0.117323	-31.1076	1.90215e-212	4.70935e-210		166.24	176.09	211.9	2371.58	2325.79	2272.86
ENSG00000140279	DUOX2	50506	15	2.997	44.365	-3.64902	0.633111	-5.76363	8.23219e-09	4.95653e-08		3.2	3.39	2.41	45.37	33.63	54.09
ENSG00000273445			2	3.445	47.862	-3.64859	0.531815	-6.86064	6.85506e-12	5.27893e-11		2.13	3.39	4.82	43.36	49.83	50.4
ENSG00000156453	PCDH1	5097	5	94.32	1182.46	-3.64576	0.10613	-34.3519	1.32098e-258	4.73982e-256		87.38	100.46	95.12	1225.12	1131.13	1191.13
ENSG00000141574	SECTM1	6398	17	100.453	1261.14	-3.63943	0.103396	-35.1989	2.07647e-271	8.03269e-269		90.58	125.3	85.48	1233.18	1268.16	1282.1
ENSG00000165949	IFI27	3429	14	2506.69	31446.1	-3.63782	0.119154	-30.5304	1.02976e-204	2.40517e-202		2312.41	2922.49	2285.18	33283.8	30682.4	30372
ENSG00000139572	GPR84	53831	12	0.401	11.133	-3.63426	0.952277	-3.81639	0.00013542	0.000518276		0	0	1.2	11.09	13.7	8.6
ENSG00000239620	PRR20G	100419008	3	2.216	35.511	-3.63048	0.501046	-7.2458	4.29909e-13	3.60803e-12		2.13	4.52	0	32.27	38.62	35.65
ENSG00000188404	SELL	6402	1	13.853	174.467	-3.61994	0.253051	-14.3052	2.0318e-46	6.61886e-45		14.92	15.8	10.84	163.35	176.89	183.16
ENSG00000198771	RCSD1	92241	1	0.401	12.221	-3.61732	0.826701	-4.37561	1.21094e-05	5.24399e-05		0	0	1.2	13.11	14.95	8.6
ENSG00000183018	SPNS2	124976	17	28.675	352.403	-3.60256	0.230605	-15.6223	5.13578e-55	2.08104e-53		27.71	28.22	30.1	347.87	376.21	333.12
ENSG00000276085				4.531	57.745	-3.60205	0.621344	-5.79719	6.74363e-09	4.08912e-08		4.26	4.52	4.82	43.36	61.04	68.84
ENSG00000168060	NAALADL1	10004	11	0	7.492	-3.57753	0.973083	-3.67649	0.000236461	0.000869366		0	0	0	10.08	7.47	4.92
ENSG00000184584	STING1	340061	5	66.483	804.752	-3.57557	0.136946	-26.1093	2.85771e-150	4.50645e-148		75.66	57.57	66.22	771.37	789.8	853.09
ENSG00000147885	IFNA16	3449	9	0.355	17.286	-3.57418	1.02253	-3.49542	0.000473318	0.00166007		1.07	0	0	17.14	22.42	12.29
ENSG00000125735	TNFSF14	8740	19	3.327	47.411	-3.57123	0.558547	-6.3938	1.61816e-10	1.11938e-09		4.26	4.52	1.2	65.54	36.13	40.56
ENSG00000118160	SLC8A2	6543	19	16.189	197.56	-3.56796	0.283747	-12.5744	2.91942e-36	6.95659e-35		15.98	16.93	15.65	207.72	201.81	183.16
ENSG00000132530	XAF1	54739	17	1307.77	15542.8	-3.56782	0.0725939	-49.1476	0	0		1296.87	1420.05	1206.4	15474.8	15495.7	15658
ENSG00000147168	IL2RG	3561	X	1.889	26.422	-3.56472	0.727533	-4.89974	9.59633e-07	4.70095e-06		2.13	1.13	2.41	27.22	31.14	20.9
ENSG00000269534			19	0	9.272	-3.5646	1.03351	-3.44903	0.0005626	0.00195164		0	0	0	8.07	6.23	13.52
ENSG00000197142	ACSL5	51703	10	13.519	165.241	-3.56321	0.316739	-11.2497	2.32416e-29	4.34932e-28		12.79	16.93	10.84	177.47	176.89	141.36
ENSG00000285744			8	1.484	21.871	-3.56024	0.642928	-5.53755	3.06741e-08	1.75105e-07		1.07	3.39	0	27.22	21.18	17.21
ENSG00000204616	TRIM31	11074	6	63.523	757.949	-3.56013	0.157998	-22.5328	1.98204e-112	2.02774e-110		75.66	64.34	50.57	841.95	730	701.9
ENSG00000129990	SYT5	6861	19	10.742	137.303	-3.55588	0.283384	-12.5479	4.07962e-36	9.64692e-35		14.92	11.29	6.02	136.12	125.82	149.97
ENSG00000169946	ZFPM2	23414	8	0	10.822	-3.55312	0.735267	-4.83242	1.34882e-06	6.4969e-06		0	0	0	15.12	9.97	7.38
ENSG00000204622	HLA-J		6	7.524	93.864	-3.54953	0.364247	-9.74485	1.94063e-22	2.74079e-21		6.39	10.16	6.02	106.88	104.64	70.07
ENSG00000225431	LINC01671	101928233	21	0	7.65	-3.51818	1.0084	-3.48889	0.000485034	0.00169875		0	0	0	8.07	9.97	4.92
ENSG00000144837	PLA1A	51365	3	54.521	622.056	-3.51484	0.185352	-18.963	3.4478e-80	2.25226e-78		56.48	55.31	51.77	663.48	594.22	608.47
ENSG00000226145	KRT16P6		17	0	6.997	-3.50185	0.95871	-3.65267	0.000259526	0.00094769		0	0	0	11.09	4.98	4.92
ENSG00000108309	RUNDC3A	10900	17	15.859	184.159	-3.4921	0.294457	-11.8594	1.92253e-32	4.0201e-31		14.92	15.8	16.86	165.37	178.14	208.97
ENSG00000168070	MAJIN	283129	11	0	8.385	-3.47216	0.787081	-4.41145	1.02682e-05	4.48361e-05		0	0	0	9.07	7.47	8.6
ENSG00000170298	LGALS9B	284194	17	4.105	48.959	-3.46692	0.545739	-6.35271	2.11552e-10	1.45046e-09		4.26	5.64	2.41	56.47	51.08	39.34
ENSG00000268916	CSAG3	389903	X	0.753	18.067	-3.46611	0.627889	-5.52026	3.38506e-08	1.92439e-07		0	2.26	0	17.14	13.7	23.36
ENSG00000203797	DDO	8528	6	10.458	119.149	-3.45916	0.407392	-8.491	2.04866e-17	2.25726e-16		12.79	10.16	8.43	114.95	118.34	124.15
ENSG00000151224	MAT1A	4143	10	4.748	56.744	-3.42807	0.560607	-6.11492	9.66071e-10	6.2942e-09		8.53	4.52	1.2	46.38	69.76	54.09
ENSG00000157551	KCNJ15	3772	21	1.889	26.405	-3.42547	0.591619	-5.78999	7.03899e-09	4.25883e-08		2.13	1.13	2.41	27.22	27.41	24.58
ENSG00000136286	MYO1G	64005	7	3.449	44.129	-3.41929	0.621136	-5.5049	3.69376e-08	2.08933e-07		3.2	1.13	6.02	54.45	37.37	40.56
ENSG00000223511			X	2.177	31.795	-3.41526	0.506114	-6.748	1.49893e-11	1.12593e-10		5.33	0	1.2	32.27	32.39	30.73
ENSG00000137745	MMP13	4322	11	9.197	100.697	-3.41104	0.302501	-11.2761	1.72137e-29	3.24089e-28		4.26	11.29	12.04	92.77	119.59	89.73
ENSG00000256152			12	6.446	72.239	-3.40874	0.445204	-7.6566	1.90924e-14	1.75607e-13		6.39	4.52	8.43	81.67	79.73	55.32
ENSG00000100298	APOBEC3H	164668	22	3.871	45.551	-3.40603	0.566623	-6.0111	1.84268e-09	1.17537e-08		2.13	2.26	7.22	41.34	49.83	45.48
ENSG00000157873	TNFRSF14	8764	1	15.21	170.785	-3.4012	0.287588	-11.8266	2.84292e-32	5.91471e-31		22.38	12.42	10.84	173.43	159.45	179.47
ENSG00000188379	IFNA2	3440	9	0	14.753	-3.39866	0.944956	-3.59663	0.00032237	0.00115922		0	0	0	12.1	14.95	17.21
ENSG00000179044	EXOC3L1	283849	16	19.002	204.776	-3.39624	0.28232	-12.0297	2.47917e-33	5.32345e-32		23.44	20.32	13.24	189.57	236.69	188.07
ENSG00000196684	HSH2D	84941	19	86.752	908.871	-3.39361	0.131707	-25.7663	2.11428e-146	3.11579e-144		62.87	91.43	105.95	870.18	949.25	907.18
ENSG00000183486	MX2	4600	21	691.845	7281.72	-3.39133	0.0781553	-43.3922	0	0		736.35	754.05	585.14	7317.42	7100.68	7427.06
ENSG00000100342	APOL1	8542	22	1179.3	12392.4	-3.38835	0.0795113	-42.6147	0	0		1165.79	1388.44	983.66	12432.6	12341.5	12403
ENSG00000129988	LBP	3929	20	5.952	66.009	-3.3821	0.443868	-7.61961	2.54437e-14	2.32277e-13		8.53	4.52	4.82	75.62	53.57	68.84
ENSG00000113555	PCDH12	51294	5	1.087	16.87	-3.38159	0.823695	-4.10539	4.03625e-05	0.000164791		2.13	1.13	0	17.14	21.18	12.29
ENSG00000249158	PCDHA11	56138	5	5.672	63.044	-3.37852	0.503604	-6.70869	1.96373e-11	1.46132e-10		7.46	1.13	8.43	60.5	59.8	68.84
ENSG00000196188	CTSE	1510	1	0.401	8.942	-3.37775	0.919278	-3.67435	0.000238455	0.000876046		0	0	1.2	7.06	7.47	12.29
ENSG00000133321	PLAAT4	5920	11	238.67	2477.94	-3.36955	0.106506	-31.6371	1.13992e-219	3.06762e-217		244.03	270.91	201.07	2638.79	2395.55	2399.47
ENSG00000163016	ALMS1P1	200420	2	4.059	48.53	-3.36694	0.578251	-5.82263	5.79288e-09	3.5339e-08		5.33	5.64	1.2	51.42	56.06	38.11
ENSG00000017483	SLC38A5	92745	X	6.303	70.445	-3.35145	0.426545	-7.85722	3.92758e-15	3.75731e-14		8.53	6.77	3.61	71.59	63.53	76.21
ENSG00000134339	SAA2	6289	11	1.513	19.928	-3.35103	0.691343	-4.84713	1.25261e-06	6.05705e-06		2.13	0	2.41	20.17	21.18	18.44
ENSG00000163568	AIM2	9447	1	0	7.849	-3.34991	0.785856	-4.26275	2.01924e-05	8.54279e-05		0	0	0	5.04	4.98	13.52
ENSG00000139567	ACVRL1	94	12	19.22	202.294	-3.34931	0.336113	-9.96481	2.17285e-23	3.1945e-22		21.31	14.67	21.67	204.69	203.05	199.14
ENSG00000196209	SIRPB2	284759	20	1.442	20.14	-3.34223	0.722927	-4.6232	3.77874e-06	1.73827e-05		3.2	1.13	0	12.1	28.65	19.67
ENSG00000100285	NEFH	4744	22	7.114	75.629	-3.32548	0.538354	-6.17712	6.52834e-10	4.31585e-09		10.66	2.26	8.43	80.67	88.45	57.77
ENSG00000204287	HLA-DRA	3122	6	0	5.622	-3.31581	0.917276	-3.61485	0.000300526	0.00108603		0	0	0	2.02	7.47	7.38
ENSG00000070915	SLC12A3	6559	16	0.731	13.229	-3.3035	0.772206	-4.278	1.88578e-05	8.00962e-05		1.07	1.13	0	16.13	14.95	8.6
ENSG00000153993	SEMA3D	223117	7	3.821	42.212	-3.28864	0.644187	-5.1051	3.30616e-07	1.70422e-06		2.13	4.52	4.82	41.34	36.13	49.17
ENSG00000004468	CD38	952	4	769.214	7489.84	-3.28149	0.0617816	-53.1144	0	0		799.22	725.83	782.6	7502.95	7285.05	7681.52
ENSG00000180176	TH	7054	11	0.376	9.483	-3.27962	0.816383	-4.01726	5.88791e-05	0.000235573		0	1.13	0	11.09	11.21	6.15
ENSG00000120675	DNAJC15	29103	13	2.617	35.798	-3.27951	0.449403	-7.29748	2.93199e-13	2.48767e-12		2.13	4.52	1.2	39.32	34.88	33.19
ENSG00000089199	CHGB	1114	20	171.661	1668.08	-3.27944	0.100479	-32.638	1.18429e-233	3.4495e-231		161.98	177.22	175.78	1716.17	1659.32	1628.74
ENSG00000106302	HYAL4	23553	7	8.653	90.712	-3.27746	0.471352	-6.95332	3.56796e-12	2.79543e-11		6.39	13.55	6.02	87.72	94.68	89.73
ENSG00000088827	SIGLEC1	6614	20	0.355	9.351	-3.27671	0.936771	-3.49787	0.000468986	0.00164604		1.07	0	0	7.06	7.47	13.52
ENSG00000172183	ISG20	3669	15	1092.29	10600.2	-3.2756	0.0647619	-50.579	0	0		1034.72	1260.88	981.25	10705.4	10512.8	10582.5
ENSG00000198574	SH2D1B	117157	1	0.753	12.089	-3.27249	0.781952	-4.18502	2.85141e-05	0.000118687		0	2.26	0	9.07	11.21	15.98
ENSG00000028137	TNFRSF1B	7133	1	58.205	562.599	-3.2683	0.159809	-20.4513	5.84533e-93	4.50837e-91		49.02	66.6	59	582.81	549.37	555.62
ENSG00000286403			5	0.401	9.557	-3.26479	0.890715	-3.66536	0.000246994	0.000905938		0	0	1.2	10.08	11.21	7.38
ENSG00000261644			16	0.731	12.77	-3.25978	0.879992	-3.70433	0.000211954	0.000786506		1.07	1.13	0	16.13	3.74	18.44
ENSG00000005513	SOX8	30812	16	16.24	156.046	-3.25659	0.319764	-10.1844	2.32876e-24	3.60122e-23		15.98	14.67	18.06	156.29	156.96	154.88
ENSG00000282851	BISPR	105221694	19	16.578	160.781	-3.25351	0.243388	-13.3676	9.35546e-41	2.5481e-39		19.18	11.29	19.26	169.4	147	165.95
ENSG00000237223	SULT1C2P1	151234	2	0.778	13.89	-3.2535	1.02365	-3.17833	0.00148128	0.00479392		0	1.13	1.2	18.15	12.46	11.06
ENSG00000106560	GIMAP2	26157	7	19.002	185.266	-3.25287	0.307209	-10.5885	3.37112e-26	5.62035e-25		23.44	20.32	13.24	195.62	186.86	173.32
ENSG00000185201	IFITM2	10581	11	1200.66	11443.3	-3.24984	0.0670566	-48.4641	0	0		1103.99	1360.22	1137.77	11118.8	11084.5	12126.4
ENSG00000214049	UCA1		19	1.129	16.654	-3.24862	0.66172	-4.90936	9.13737e-07	4.4841e-06		0	3.39	0	14.12	14.95	20.9
ENSG00000173157	ADAMTS20	80070	12	2.241	27.429	-3.24607	0.792243	-4.09731	4.17974e-05	0.000170397		2.13	3.39	1.2	24.2	23.67	34.42
ENSG00000079215	SLC1A3	6507	5	0.753	13.209	-3.23327	0.666113	-4.85394	1.21032e-06	5.86862e-06		0	2.26	0	11.09	19.93	8.6
ENSG00000265907			18	0.401	9.004	-3.22669	0.96108	-3.35735	0.000786927	0.00266194		0	0	1.2	6.05	4.98	15.98
ENSG00000119922	IFIT2	3433	10	5814.94	54386.3	-3.22051	0.0808731	-39.8218	0	0		6278.67	6430.84	4735.31	53892	54664.1	54602.8
ENSG00000105371	ICAM4	3386	19	0	6.079	-3.22022	0.878914	-3.66386	0.000248438	0.000910425		0	0	0	7.06	8.72	2.46
ENSG00000204614	TRIM40	135644	6	0.778	11.931	-3.21182	0.902824	-3.55753	0.000374362	0.0013357		0	1.13	1.2	11.09	8.72	15.98
ENSG00000178107			14	0	5.322	-3.20756	0.934558	-3.43216	0.000598786	0.00206594		0	0	0	6.05	6.23	3.69
ENSG00000187510	PLEKHG7	440107	12	6.463	61.844	-3.19693	0.461255	-6.93093	4.18069e-12	3.26002e-11		4.26	7.9	7.22	49.41	68.52	67.61
ENSG00000133392	MYH11	4629	16	2.734	28.839	-3.19676	0.640391	-4.99188	5.97929e-07	2.99909e-06		0	3.39	4.82	22.18	31.14	33.19
ENSG00000133048	CHI3L1	1116	1	0	4.907	-3.18644	0.924376	-3.44713	0.000566573	0.00196377		0	0	0	6.05	4.98	3.69
ENSG00000206341	HLA-H		6	163.207	1500.66	-3.18508	0.151382	-21.04	2.82102e-98	2.28993e-96		161.98	160.29	167.36	1465.1	1534.74	1502.13
ENSG00000185338	SOCS1	8651	16	63.471	582.557	-3.18161	0.177151	-17.9599	4.01532e-72	2.33909e-70		61.81	75.63	52.98	612.05	541.89	593.72
ENSG00000205300			20	0.731	12.515	-3.17671	0.7616	-4.1711	3.03133e-05	0.000125711		1.07	1.13	0	9.07	14.95	13.52
ENSG00000188293	IGFL1	374918	19	10.17	93.15	-3.17331	0.386592	-8.20843	2.24101e-16	2.32828e-15		9.59	11.29	9.63	82.68	99.66	97.11
ENSG00000064763	FAR2	55711	12	2.596	27.084	-3.17179	0.735416	-4.31292	1.6111e-05	6.8926e-05		3.2	3.39	1.2	18.15	31.14	31.96
ENSG00000225964	NRIR		2	6.968	65.359	-3.17155	0.405737	-7.81676	5.41987e-15	5.15304e-14		11.72	6.77	2.41	73.61	58.55	63.92
ENSG00000135625	EGR4	1961	2	1.534	18.484	-3.16261	0.632018	-5.00398	5.61575e-07	2.82706e-06		1.07	1.13	2.41	12.1	24.91	18.44
ENSG00000169006	NTSR2	23620	2	0	7.376	-3.15882	1.01861	-3.1011	0.00192801			0	0	0	6.05	7.47	8.6
ENSG00000236069			1	0	5.628	-3.15798	1.00267	-3.14957	0.0016351	0.00525737		0	0	0	2.02	8.72	6.15
ENSG00000186081	KRT5	3852	12	0.355	7.89	-3.15221	0.972725	-3.2406	0.00119279	0.0039231		1.07	0	0	10.08	4.98	8.6
ENSG00000166278	C2	717	6	8.306	78.185	-3.14434	0.372794	-8.43453	3.32537e-17	3.62206e-16		7.46	9.03	8.43	78.65	77.24	78.67
ENSG00000170476	MZB1	51237	5	0	5.311	-3.13047	0.956213	-3.27382	0.00106105	0.00351949		0	0	0	6.05	3.74	6.15
ENSG00000257443			12	0	5.322	-3.127	0.892939	-3.50192	0.00046192	0.00162216		0	0	0	6.05	6.23	3.69
ENSG00000160716	CHRNB2	1141	1	63.834	562.726	-3.12622	0.184047	-16.9859	1.04365e-64	5.38305e-63		65	71.12	55.38	538.45	586.74	562.99
ENSG00000064835	POU1F1	5449	3	0.401	7.901	-3.12558	1.00406	-3.11294	0.00185234	0.00589237		0	0	1.2	10.08	7.47	6.15
ENSG00000137496	IL18BP	10068	11	188.099	1648.88	-3.1248	0.10786	-28.9709	1.53227e-184	3.05936e-182		190.75	176.09	197.45	1702.05	1624.44	1620.14
ENSG00000261150	EPPK1	83481	8	6.409	65.396	-3.10395	0.486988	-6.37379	1.84419e-10	1.27041e-09		3.2	12.42	3.61	61.51	52.32	82.36
ENSG00000102001	CACNA1F	778	X	0	5.983	-3.10358	0.856972	-3.62156	0.000292829	0.00106101		0	0	0	8.07	3.74	6.15
ENSG00000133067	LGR6	59352	1	39.438	343.078	-3.09824	0.22333	-13.8729	9.24057e-44	2.77307e-42		47.95	28.22	42.14	366.02	327.63	335.58
ENSG00000226835	ARHGAP29-AS1	107985092	1	1.843	20.547	-3.09723	0.651722	-4.75238	2.01035e-06	9.52577e-06		3.2	1.13	1.2	17.14	18.69	25.81
ENSG00000206075	SERPINB5	5268	18	1.154	17.559	-3.08756	0.570588	-5.4112	6.2605e-08	3.46596e-07		0	2.26	1.2	19.16	24.91	8.6
ENSG00000273301			2	0	5.286	-3.08357	0.950363	-3.24462	0.00117608	0.00387354		0	0	0	1.01	7.47	7.38
ENSG00000159871	LYPD5	284348	19	4.201	41.584	-3.07596	0.423262	-7.26727	3.66815e-13	3.09214e-12		3.2	3.39	6.02	39.32	46.09	39.34
ENSG00000141837	CACNA1A	773	19	7.123	65.003	-3.07416	0.467431	-6.57672	4.80931e-11	3.46231e-10		6.39	10.16	4.82	57.47	82.22	55.32
ENSG00000253838			8	0.803	10.781	-3.07407	0.919087	-3.3447	0.000823703	0.00277761		0	0	2.41	10.08	9.97	12.29
ENSG00000133106	EPSTI1	94240	13	104.868	889.02	-3.07319	0.117246	-26.2114	1.97155e-151	3.14913e-149		117.22	109.49	87.89	904.47	918.11	844.49
ENSG00000185291	IL3RA	3563	X	12.048	103.14	-3.06048	0.365121	-8.38209	5.19942e-17	5.59927e-16		8.53	19.19	8.43	108.9	104.64	95.88
ENSG00000189143	CLDN4	1364	7	69.448	581.931	-3.05643	0.121452	-25.1657	9.51086e-140	1.31547e-137		70.33	60.96	77.06	605	561.83	578.97
ENSG00000285761			6	2.621	25.25	-3.05144	0.577165	-5.28695	1.24372e-07	6.67942e-07		3.2	2.26	2.41	26.22	27.41	22.13
ENSG00000185499	MUC1	4582	1	124.178	1031.63	-3.04381	0.13913	-21.8775	4.25627e-106	3.96153e-104		116.15	109.49	146.89	1150.5	908.14	1036.25
ENSG00000124772	CPNE5	57699	6	1.488	17.023	-3.04329	0.609424	-4.99371	5.92305e-07	2.97329e-06		2.13	1.13	1.2	15.12	22.42	13.52
ENSG00000163283	ALPP	250	2	4.645	43.989	-3.04084	0.393643	-7.72487	1.11969e-14	1.04491e-13		1.07	5.64	7.22	45.37	41.11	45.48
ENSG00000285090			7	1.467	15.75	-3.03823	0.791034	-3.84083	0.00012262	0.000471842		3.2	0	1.2	15.12	12.46	19.67
ENSG00000266786	LGALS9DP		17	0.355	8.264	-3.03428	1.0224	-2.96779	0.00299946	0.00919749		1.07	0	0	5.04	6.23	13.52
ENSG00000204539	CDSN	1041	6	0	5.065	-3.03093	0.906001	-3.34539	0.000821657	0.00277147		0	0	0	4.03	7.47	3.69
ENSG00000197646	PDCD1LG2	80380	9	61.135	504.249	-3.0309	0.188621	-16.0688	4.22515e-58	1.85801e-56		54.35	68.86	60.2	475.93	507.01	529.8
ENSG00000258713	C20orf141	128653	20	3.373	30.2	-3.02863	0.510684	-5.93054	3.01931e-09	1.89198e-08		3.2	4.52	2.41	26.22	34.88	29.5
ENSG00000287158			3	1.843	19.561	-3.02405	0.925446	-3.26767	0.00108437	0.00358963		3.2	1.13	1.2	14.12	23.67	20.9
ENSG00000116194	ANGPTL1	9068	1	5.547	48.407	-3.02275	0.5751	-5.25604	1.47188e-07	7.84515e-07		7.46	6.77	2.41	52.43	44.85	47.94
ENSG00000092054	MYH7	4625	14	0	7.199	-3.0192	1.01151	-2.98486	0.00283709			0	0	0	3.02	9.97	8.6
ENSG00000103313	MEFV	4210	16	0.71	11.543	-3.01899	0.676284	-4.46408	8.0412e-06	3.56334e-05		2.13	0	0	11.09	13.7	9.83
ENSG00000142611	PRDM16	63976	1	22.568	183.864	-3.01824	0.289176	-10.4374	1.67374e-25	2.70662e-24		24.51	20.32	22.88	186.54	183.12	181.93
ENSG00000054356	PTPRN	5798	2	16.207	134.331	-3.0067	0.232084	-12.9552	2.19493e-38	5.54512e-37		13.85	20.32	14.45	128.06	154.47	120.47
ENSG00000178078	STAP2	55620	19	2.671	27.935	-3.00075	0.472224	-6.35449	2.09113e-10	1.43493e-09		3.2	0	4.82	23.19	28.65	31.96
ENSG00000248109	MARCOL	105378220	5	0	4.235	-2.99883	0.916213	-3.27307	0.00106387	0.00352836		0	0	0	4.03	4.98	3.69
ENSG00000125508	SRMS	6725	20	0	5.054	-2.99868	0.999423	-3.00041	0.0026962	0.00834302		0	0	0	4.03	4.98	6.15
ENSG00000153253	SCN3A	6328	2	3.783	32.457	-2.99541	0.510843	-5.86366	4.52773e-09	2.79336e-08		5.33	0	6.02	34.28	29.9	33.19
ENSG00000227017			7	0	7.461	-2.99375	1.0361	-2.88943	0.00385942			0	0	0	5.04	9.97	7.38
ENSG00000104213	PDGFRL	5157	8	399.611	3166.42	-2.98197	0.0856209	-34.8276	9.29148e-266	3.48543e-263		403.87	410.89	384.07	3187.32	3140.5	3171.44
ENSG00000110492	MDK	4192	11	503.349	3977.77	-2.98063	0.0634328	-46.9889	0	0		474.2	536.19	499.66	4143.21	3836.86	3953.23
ENSG00000180616	SSTR2	6752	17	7.574	62.29	-2.97924	0.521539	-5.71239	1.11399e-08	6.62504e-08		6.39	7.9	8.43	64.53	48.58	73.75
ENSG00000178233	TMEM151B	441151	6	0	4.986	-2.9787	0.990213	-3.00814	0.00262854	0.00815097		0	0	0	5.04	6.23	3.69
ENSG00000261618	LINC02605		8	2.55	23.959	-2.97314	0.701726	-4.23689	2.26635e-05	9.53609e-05		4.26	3.39	0	16.13	32.39	23.36
ENSG00000164061	BSN	8927	3	50.967	409.234	-2.97228	0.244649	-12.1492	5.79429e-34	1.26727e-32		52.22	42.89	57.79	385.18	408.6	433.92
ENSG00000230191	IFITM3P4		7	0.753	10.254	-2.96996	0.930189	-3.19286	0.00140873	0.00457708		0	2.26	0	17.14	7.47	6.15
ENSG00000145113	MUC4	4585	3	1.179	16.208	-2.96711	0.622859	-4.7637	1.90075e-06	9.03413e-06		0	1.13	2.41	9.07	16.19	23.36
ENSG00000275620		100192386	20	19.074	148.634	-2.9661	0.28999	-10.2283	1.48151e-24	2.29964e-23		15.98	13.55	27.69	151.25	158.21	136.45
ENSG00000157782	CABP1	9478	12	10.099	82.86	-2.96523	0.442198	-6.70566	2.00493e-11	1.49108e-10		10.66	12.42	7.22	87.72	79.73	81.13
ENSG00000117266	CDK18	5129	1	89.147	700.534	-2.964	0.145729	-20.3392	5.79185e-92	4.41214e-90		72.46	109.49	85.48	667.51	710.07	724.02
ENSG00000233098				1.133	17.688	-2.9635	0.547918	-5.40865	6.35022e-08	3.51248e-07		1.07	1.13	1.2	22.18	11.21	19.67
ENSG00000236098			1	4.933	42.022	-2.96277	0.426825	-6.94142	3.88183e-12	3.03653e-11		4.26	4.52	6.02	49.41	33.63	43.02
ENSG00000144596	GRIP2	80852	3	45.996	362.229	-2.96272	0.208539	-14.207	8.28833e-46	2.64436e-44		57.54	39.51	40.94	407.36	337.59	341.73
ENSG00000130600				66.452	523.561	-2.96025	0.201707	-14.676	9.19029e-49	3.21375e-47		80.99	30.48	87.89	601.97	469.64	499.07
ENSG00000279296	PRAL		17	0.355	8.021	-2.95913	1.02262	-2.89368	0.00380759	0.0114265		1.07	0	0	8.07	1.25	14.75
ENSG00000108387	SEPTIN4	5414	17	24.061	189.212	-2.95865	0.27548	-10.74	6.60579e-27	1.12713e-25		21.31	13.55	37.32	186.54	188.11	192.99
ENSG00000236337	FMR1-IT1		X	0	4.901	-2.9561	0.92412	-3.19883	0.00137988	0.0044922		0	0	0	6.05	3.74	4.92
ENSG00000110799	VWF	7450	12	0	5.863	-2.95405	0.849561	-3.47715	0.000506771	0.00177112		0	0	0	4.03	2.49	11.06
ENSG00000187997	C17orf99	100141515	17	0.376	6.814	-2.95088	0.912691	-3.23317	0.00122426	0.00401939		0	1.13	0	8.07	6.23	6.15
ENSG00000171916	LGALS9C	654346	17	0.803	10.065	-2.94902	0.878813	-3.35568	0.000791687	0.00267621		0	0	2.41	14.12	7.47	8.6
ENSG00000159251	ACTC1	70	15	0	5.571	-2.93387	0.813674	-3.6057	0.00031131	0.00112311		0	0	0	3.02	12.46	1.23
ENSG00000225101	OR52K3P		11	18.647	146.014	-2.93276	0.402784	-7.28123	3.30799e-13	2.79139e-12		22.38	20.32	13.24	129.07	125.82	183.16
ENSG00000007216	SLC13A2	9058	17	1.91	17.947	-2.93207	0.83172	-3.52531	0.000422992	0.00149414		1.07	2.26	2.41	19.16	19.93	14.75
ENSG00000173762	CD7	924	17	0.355	8.433	-2.92667	0.773289	-3.7847	0.000153896	0.00058438		1.07	0	0	3.02	11.21	11.06
ENSG00000174521	TTC9B	148014	19	3.636	31.44	-2.9254	0.510712	-5.72808	1.01574e-08	6.06409e-08		6.39	4.52	0	26.22	37.37	30.73
ENSG00000120242	IFNA8	3445	9	0.401	12.351	-2.91189	0.984705	-2.95712	0.00310529	0.00949614		0	0	1.2	11.09	11.21	14.75
ENSG00000204632	HLA-G	3135	6	34.896	264.574	-2.9102	0.203049	-14.3325	1.37186e-46	4.49862e-45		34.1	42.89	27.69	275.27	256.62	261.83
ENSG00000111335	OAS2	4939	12	6485.52	48829.3	-2.9087	0.0764898	-38.0273	0	0		6499.25	7268.42	5688.87	48353.2	47867.3	50267.3
ENSG00000175084	DES	1674	2	0.71	9.278	-2.9066	0.780016	-3.72634	0.000194284	0.000725722		2.13	0	0	8.07	7.47	12.29
ENSG00000175920	DOK7	285489	4	22.292	170.711	-2.90248	0.220891	-13.1399	1.94545e-39	5.11312e-38		24.51	14.67	27.69	164.36	178.14	169.64
ENSG00000151882	CCL28	56477	5	10.011	80.487	-2.89224	0.286991	-10.0778	6.92613e-24	1.04623e-22		13.85	10.16	6.02	96.8	63.53	81.13
ENSG00000236256	DIAPH2-AS1	10824	X	3.022	25.047	-2.89084	0.582668	-4.96138	6.99933e-07	3.4804e-06		3.2	2.26	3.61	28.23	14.95	31.96
ENSG00000167207	NOD2	64127	16	1.885	17.357	-2.88793	0.827368	-3.4905	0.000482122	0.00168927		1.07	3.39	1.2	21.17	12.46	18.44
ENSG00000081277	PKP1	5317	1	0	4.65	-2.88705	0.984167	-2.9335	0.00335165	0.0101804		0	0	0	4.03	6.23	3.69
ENSG00000188760	TMEM198	130612	2	30.511	227.025	-2.88466	0.201231	-14.3351	1.32127e-46	4.35001e-45		22.38	28.22	40.94	236.96	213.02	231.1
ENSG00000198326	TMEM239	100288797	20	0.731	9.122	-2.88199	0.742461	-3.88166	0.000103745	0.000402272		1.07	1.13	0	5.04	14.95	7.38
ENSG00000269720	CCDC194	110806280	19	1.179	10.781	-2.87335	0.737028	-3.89856	9.67666e-05	0.000376808		0	1.13	2.41	10.08	9.97	12.29
ENSG00000162398	LEXM	163747	1	0	4.156	-2.86559	0.972045	-2.94801	0.00319832	0.00975652		0	0	0	5.04	3.74	3.69
ENSG00000161031	PGLYRP2	114770	19	0	4.076	-2.8595	0.983632	-2.90708	0.00364817	0.0109907		0	0	0	6.05	2.49	3.69
ENSG00000167656	LY6D	8581	8	0.401	6.978	-2.85425	0.819141	-3.48444	0.000493167	0.00172577		0	0	1.2	6.05	9.97	4.92
ENSG00000188761	BCL2L15	440603	1	21.733	158.287	-2.85149	0.286497	-9.95292	2.44882e-23	3.59171e-22		15.98	20.32	28.9	170.41	155.72	148.74
ENSG00000166743	ACSM1	116285	16	0	5.631	-2.85123	1.0346	-2.75588	0.00585338	0.0169396		0	0	0	7.06	0	9.83
ENSG00000143882	ATP6V1C2	245973	2	5.664	43.57	-2.84422	0.497067	-5.722	1.05277e-08	6.27304e-08		5.33	5.64	6.02	40.33	48.58	41.79
ENSG00000228140			1	2.575	23.506	-2.84307	0.525418	-5.41106	6.26545e-08	3.46792e-07		4.26	2.26	1.2	22.18	29.9	18.44
ENSG00000256540			12	1.914	17.662	-2.8416	0.817638	-3.47537	0.000510145	0.00178166		2.13	0	3.61	17.14	14.95	20.9
ENSG00000119917	IFIT3	3437	10	10176.1	72624.9	-2.83165	0.0744658	-38.0262	0	0		10503.9	11411.2	8613.37	72356.4	72659.9	72858.2
ENSG00000111801	BTN3A3	10384	6	151.974	1087.07	-2.82898	0.105891	-26.7158	3.0834e-157	5.02229e-155		163.04	158.03	134.85	1076.89	1111.19	1073.13
ENSG00000168348	INSM2	84684	14	0.731	8.475	-2.82808	0.901788	-3.13608	0.00171224	0.00548403		1.07	1.13	0	8.07	11.21	6.15
ENSG00000148734	NPFFR1	64106	10	0	4.224	-2.82734	0.907425	-3.11579	0.00183455	0.00584026		0	0	0	4.03	2.49	6.15
ENSG00000111704	NANOG	79923	12	0.376	9.961	-2.82457	1.00821	-2.80156	0.00508569	0.0148937		0	1.13	0	10.08	9.97	9.83
ENSG00000180720	CHRM4	1132	11	5.647	43.494	-2.82207	0.411938	-6.85072	7.34767e-12	5.64423e-11		7.46	2.26	7.22	46.38	38.62	45.48
ENSG00000204525	HLA-C	3107	6	3805.59	26921.1	-2.82105	0.0511294	-55.1748	0	0		3643.38	4061.47	3711.91	27284.3	26891.7	26587.2
ENSG00000173208	ABCD2	225	12	0	4.156	-2.81942	0.974354	-2.89363	0.00380813	0.0114267		0	0	0	5.04	3.74	3.69
ENSG00000101198	NKAIN4	128414	20	33.988	242.038	-2.8192	0.239798	-11.7565	6.53574e-32	1.34284e-30		33.03	31.61	37.32	224.86	257.87	243.39
ENSG00000260777			17	6.467	46.858	-2.81344	0.52427	-5.3664	8.03246e-08	4.39875e-07		5.33	5.64	8.43	51.42	48.58	40.56
ENSG00000134470	IL15RA	3601	10	114.021	805.779	-2.81293	0.116982	-24.0458	9.22969e-128	1.11468e-125		109.76	127.56	104.75	796.58	789.8	830.97
ENSG00000226125	LINC01907	151475	2	0.401	7.035	-2.81284	0.779276	-3.60956	0.000306717	0.0011076		0	0	1.2	5.04	6.23	9.83
ENSG00000099834	CDHR5	53841	11	1.605	14.725	-2.81082	0.873557	-3.21768	0.00129233	0.00422605		0	0	4.82	12.1	8.72	23.36
ENSG00000273076			22	0.778	8.978	-2.808	0.83491	-3.36324	0.000770339	0.00260904		0	1.13	1.2	12.1	6.23	8.6
ENSG00000155629	PIK3AP1	118788	10	166.638	1167.66	-2.80559	0.110993	-25.2772	5.69276e-141	7.96278e-139		173.7	163.68	162.54	1190.83	1109.95	1202.2
ENSG00000167895	TMC8	147138	17	35.267	250.878	-2.80283	0.180409	-15.536	1.98035e-54	7.93358e-53		39.43	33.86	32.51	250.06	264.1	238.47
ENSG00000101204	CHRNA4	1137	20	2.312	18.682	-2.79894	0.755219	-3.70613	0.000210448	0.000781267		1.07	2.26	3.61	20.17	17.44	18.44
ENSG00000005379	TSPOAP1	9256	17	0.401	5.915	-2.79714	0.851127	-3.2864	0.00101478	0.00337551		0	0	1.2	9.07	4.98	3.69
ENSG00000170369	CST2	1470	20	4.929	35.929	-2.79575	0.55747	-5.01507	5.30147e-07	2.67319e-06		3.2	6.77	4.82	37.31	31.14	39.34
ENSG00000205212	CCDC144NL	339184	17	0.803	9.551	-2.79464	0.696556	-4.01208	6.01869e-05	0.000240495		0	0	2.41	10.08	9.97	8.6
ENSG00000130487	KLHDC7B	113730	22	25.929	183.072	-2.79361	0.264516	-10.5612	4.50707e-26	7.46894e-25		24.51	31.61	21.67	169.4	184.37	195.45
ENSG00000237352	LINC01358		1	7.503	55.129	-2.79006	0.451805	-6.17537	6.60088e-10	4.36148e-09		7.46	9.03	6.02	45.37	58.55	61.46
ENSG00000007952	NOX1	27035	X	1.843	15.597	-2.78586	0.709713	-3.92533	8.66093e-05	0.000339338		3.2	1.13	1.2	17.14	11.21	18.44
ENSG00000273777	CEACAM20	125931	19	0.401	6.746	-2.77892	0.768119	-3.61782	0.000297093	0.00107504		0	0	1.2	9.07	7.47	3.69
ENSG00000188089	PLA2G4E	123745	15	1.129	12.45	-2.77582	0.983069	-2.82362	0.00474842	0.0139954		0	3.39	0	15.12	7.47	14.75
ENSG00000167748	KLK1	3816	19	1.559	13.201	-2.77542	0.786735	-3.52777	0.000419079	0.00148116		1.07	0	3.61	16.13	8.72	14.75
ENSG00000063015	SEZ6	124925	17	0.355	6.388	-2.77395	1.01281	-2.73886	0.00616534	0.017749		1.07	0	0	8.07	2.49	8.6
ENSG00000216490	IFI30	10437	19	0.778	9.508	-2.77123	0.768135	-3.60774	0.000308881	0.00111493		0	1.13	1.2	16.13	7.47	4.92
ENSG00000183831	ANKRD45	339416	1	4.51	33.413	-2.77067	0.56214	-4.92879	8.27397e-07	4.07737e-06		5.33	3.39	4.82	38.32	34.88	27.04
ENSG00000007171	NOS2	4843	17	27.341	187.582	-2.76864	0.268416	-10.3148	6.0436e-25	9.53648e-24		33.03	23.71	25.28	191.58	180.63	190.53
ENSG00000174844	DNAH12	201625	3	3.348	26.158	-2.76363	0.568374	-4.86235	1.16001e-06	5.63017e-06		3.2	5.64	1.2	19.16	23.67	35.65
ENSG00000169583	CLIC3	9022	9	7.574	56.056	-2.76271	0.344965	-8.00865	1.15975e-15	1.14486e-14		6.39	7.9	8.43	60.5	54.81	52.86
ENSG00000175175	PPM1E	22843	17	5.526	41.38	-2.76064	0.468762	-5.88923	3.88001e-09	2.40514e-08		8.53	5.64	2.41	52.43	31.14	40.56
ENSG00000173432	SAA1	6288	11	7.574	53.256	-2.75388	0.401519	-6.85866	6.95095e-12	5.35111e-11		6.39	7.9	8.43	59.49	53.57	46.71
ENSG00000237212			9	1.179	10.229	-2.74325	0.813256	-3.37317	0.000743073	0.00252637		0	1.13	2.41	12.1	11.21	7.38
ENSG00000206503	HLA-A	3105	6	3989.51	26606.5	-2.73573	0.0550044	-49.7367	0	0		3817.07	4224.01	3927.43	27293.4	26422	26104.1
ENSG00000286802			1	4.523	33.497	-2.73233	0.593667	-4.60246	4.17535e-06	1.91396e-05		2.13	9.03	2.41	31.26	29.9	39.34
ENSG00000142273	CBLC	23624	19	2.312	18.515	-2.73222	0.527736	-5.17725	2.2518e-07	1.18315e-06		1.07	2.26	3.61	17.14	22.42	15.98
ENSG00000123405	NFE2	4778	12	7.6	54.259	-2.72447	0.341657	-7.9743	1.53249e-15	1.49611e-14		6.39	6.77	9.63	62.52	52.32	47.94
ENSG00000120217	CD274	29126	9	264.483	1756.82	-2.72437	0.0894089	-30.4709	6.34284e-204	1.45404e-201		290.92	282.2	220.33	1803.89	1679.25	1787.31
ENSG00000186207	LCE5A	254910	1	0.753	8.133	-2.72379	0.967613	-2.81495	0.00487842	0.0143433		0	2.26	0	7.06	9.97	7.38
ENSG00000135114	OASL	8638	12	5364.85	35489.1	-2.72233	0.0756808	-35.9712	2.35663e-283	1.02361e-280		5171.48	6211.85	4711.23	35366	35806.1	35295.1
ENSG00000090339	ICAM1	3383	19	165.465	1093.74	-2.72109	0.0890424	-30.5595	4.23469e-205	9.985e-203		161.98	167.06	167.36	1155.54	1045.17	1080.5
ENSG00000215612	HMX1	3166	4	2.968	25.765	-2.71812	0.907959	-2.99366	0.00275654	0.00851059		2.13	6.77	0	19.16	27.41	30.73
ENSG00000230795	HLA-K		6	18.359	125.589	-2.71498	0.226923	-11.9643	5.46618e-33	1.16165e-31		19.18	21.45	14.45	117.97	142.01	116.78
ENSG00000183671	GPR1	2825	2	3.373	25.955	-2.71415	0.473517	-5.73189	9.93151e-09	5.94067e-08		3.2	4.52	2.41	28.23	34.88	14.75
ENSG00000188505	NCCRP1	342897	19	14.659	99.715	-2.71389	0.295667	-9.17889	4.35544e-20	5.56408e-19		15.98	13.55	14.45	110.92	104.64	83.59
ENSG00000147873	IFNA5	3442	9	0	8.128	-2.71254	0.920244	-2.94763	0.00320221			0	0	0	7.06	8.72	8.6
ENSG00000171860	C3AR1	719	12	2.692	19.086	-2.70737	0.693397	-3.9045	9.44207e-05	0.000368311		2.13	1.13	4.82	20.17	16.19	20.9
ENSG00000110436	SLC1A2	6506	11	1.889	15.278	-2.70729	0.735137	-3.6827	0.000230778	0.000849986		2.13	1.13	2.41	16.13	14.95	14.75
ENSG00000196114	IFITM3P3		6	0.731	7.797	-2.70237	0.847905	-3.18712	0.00143699	0.00466339		1.07	1.13	0	6.05	9.97	7.38
ENSG00000173391	OLR1	4973	12	16.908	112.814	-2.69573	0.232705	-11.5843	4.94994e-31	9.89108e-30		20.25	12.42	18.06	111.92	118.34	108.17
ENSG00000101680	LAMA1	284217	18	3.072	22.897	-2.6953	0.484195	-5.56655	2.59839e-08	1.49433e-07		3.2	0	6.02	19.16	27.41	22.13
ENSG00000160013	PTGIR	5739	19	7.776	54.154	-2.69526	0.527402	-5.11045	3.214e-07	1.66018e-06		0	11.29	12.04	52.43	47.34	62.69
ENSG00000109101	FOXN1	8456	17	0.401	5.816	-2.68718	0.980185	-2.74151	0.0061158	0.0176228		0	0	1.2	5.04	8.72	3.69
ENSG00000111181	SLC6A12	6539	12	12.908	84.524	-2.68372	0.351251	-7.64047	2.16437e-14	1.98318e-13		10.66	12.42	15.65	92.77	75.99	84.82
ENSG00000130224	LRCH2	57631	X	2.337	17.185	-2.68059	0.827277	-3.24026	0.00119421	0.00392697		1.07	1.13	4.82	18.15	16.19	17.21
ENSG00000186803	IFNA10	3446	9	0	9.887	-2.67727	0.872535	-3.06838	0.00215221	0.00676628		0	0	0	11.09	9.97	8.6
ENSG00000203812	H2AC18	8337	1	0	3.593	-2.67699	0.969945	-2.75994	0.0057812	0.0167522		0	0	0	7.06	2.49	1.23
ENSG00000198133	TMEM229B	161145	14	49.284	316.704	-2.67333	0.218394	-12.2408	1.88078e-34	4.17993e-33		44.76	60.96	42.14	322.66	318.91	308.54
ENSG00000171401	KRT13	3860	17	0	3.746	-2.66811	0.887729	-3.00555	0.002651	0.00821343		0	0	0	5.04	3.74	2.46
ENSG00000123610	TNFAIP6	7130	2	3.001	22.239	-2.66435	0.590695	-4.51053	6.46657e-06	2.89249e-05		4.26	1.13	3.61	22.18	21.18	23.36
ENSG00000198785	GRIN3A	116443	9	1.864	17.026	-2.66366	0.992129	-2.68479	0.00725752	0.0205986		2.13	2.26	1.2	20.17	13.7	17.21
ENSG00000169427	KCNK9	51305	8	4.844	34.15	-2.65994	0.564294	-4.71375	2.43199e-06	1.14318e-05		7.46	2.26	4.82	28.23	34.88	39.34
ENSG00000140323	DISP2	85455	15	62.533	397.79	-2.65724	0.161127	-16.4915	4.22013e-61	1.99393e-59		66.07	55.31	66.22	401.31	403.62	388.44
ENSG00000154099	DNAAF1	123872	16	2.383	17.747	-2.64993	0.63242	-4.19015	2.78775e-05	0.000116213		0	1.13	6.02	16.13	17.44	19.67
ENSG00000138185	ENTPD1	953	10	8.214	54.012	-2.64721	0.487554	-5.42958	5.64875e-08	3.14203e-07		9.59	9.03	6.02	44.37	67.27	50.4
ENSG00000103056	SMPD3	55512	16	10.697	68.823	-2.6448	0.36166	-7.31295	2.61335e-13	2.22724e-12		9.59	5.64	16.86	71.59	67.27	67.61
ENSG00000287077			10	0	4.167	-2.64423	0.90481	-2.92241	0.00347332	0.0105138		0	0	0	5.04	6.23	1.23
ENSG00000166920	C15orf48	84419	15	407.252	2557.88	-2.64421	0.0848395	-31.1672	2.97052e-213	7.58187e-211		420.92	467.33	333.51	2486.53	2670.85	2516.25
ENSG00000174885	NLRP6	171389	11	0	4.382	-2.64404	1.02713	-2.57419	0.0100475	0.0275813		0	0	0	2.02	4.98	6.15
ENSG00000204323	SMIM5	643008	17	7.812	51.831	-2.64036	0.389314	-6.78208	1.18458e-11	8.966e-11		9.59	9.03	4.82	40.33	63.53	51.63
ENSG00000120341				5.639	37.615	-2.63998	0.565699	-4.66676	3.05983e-06	1.4229e-05		5.33	6.77	4.82	42.35	32.39	38.11
ENSG00000187608	ISG15	9636	1	8473.49	52914.6	-2.63947	0.0740564	-35.6414	3.20506e-278	1.27985e-275		7650.13	9698.75	8071.57	51601.1	54656.6	52486.1
ENSG00000156966	B3GNT7	93010	2	194.05	1209.48	-2.6368	0.0838979	-31.4287	8.2162e-217	2.14123e-214		179.03	202.06	201.07	1158.57	1232.03	1237.84
ENSG00000256249			12	0	3.751	-2.63495	0.983539	-2.67906	0.00738301	0.020914		0	0	0	5.04	4.98	1.23
ENSG00000132821	VSTM2L	128434	20	77.471	481.901	-2.63296	0.130952	-20.1063	6.50289e-90	4.82032e-88		69.27	81.27	81.87	514.25	440.99	490.47
ENSG00000139192	TAPBPL	55080	12	270.204	1679.43	-2.63118	0.0824399	-31.9163	1.58545e-223	4.31348e-221		278.13	284.46	248.02	1712.14	1659.32	1666.85
ENSG00000261402			9	0.376	5.8	-2.6309	1.02199	-2.57429	0.0100445	0.0275762		0	1.13	0	5.04	4.98	7.38
ENSG00000076356	PLXNA2	5362	1	249.5	1542.26	-2.62336	0.114868	-22.838	1.92194e-115	2.04221e-113		255.75	230.28	262.47	1545.76	1433.84	1647.18
ENSG00000156587	UBE2L6	9246	11	3722.43	22964.9	-2.62309	0.0553496	-47.3914	0	0		3656.16	4112.26	3398.87	22702.5	22645	23547.3
ENSG00000197177	ADGRA1	84435	10	0.401	6.221	-2.62206	1.01839	-2.57472	0.0100322	0.0275453		0	0	1.2	5.04	7.47	6.15
ENSG00000008735	MAPK8IP2	23542	22	408.877	2515.38	-2.61913	0.0886657	-29.5394	8.97782e-192	1.83697e-189		360.18	440.24	426.21	2440.15	2579.92	2526.09
ENSG00000253525	CPP		8	0	3.972	-2.61848	1.0294	-2.5437	0.0109685			0	0	0	2.02	4.98	4.92
ENSG00000134326	CMPK2	129607	2	2174.91	13348.8	-2.61387	0.0815977	-32.0336	3.71558e-225	1.0336e-222		2218.63	2485.64	1820.44	13299.8	13055.3	13691.3
ENSG00000078053	AMPH	273	7	1.534	12.357	-2.61372	0.868484	-3.00952	0.00261664	0.00811813		1.07	1.13	2.41	11.09	12.46	13.52
ENSG00000135094	SDS	10993	12	25.779	158.572	-2.61304	0.276823	-9.43938	3.74997e-21	5.0595e-20		24.51	20.32	32.51	155.28	155.72	164.72
ENSG00000178685	PARP10	84875	8	2130.11	13045	-2.61097	0.0840878	-31.0505	1.12311e-211	2.75307e-209		1875.5	2424.69	2090.13	13234.3	13233.4	12667.3
ENSG00000090104	RGS1	5996	1	0	3.147	-2.60773	0.921982	-2.82839	0.00467824	0.0138001		0	0	0	2.02	3.74	3.69
ENSG00000217442	SYCE3	644186	22	0.355	6.243	-2.6072	0.886538	-2.94088	0.00327285	0.00995955		1.07	0	0	5.04	12.46	1.23
ENSG00000185303	SFTPA2	729238	10	0.355	5.401	-2.60678	0.991837	-2.62824	0.00858291	0.0239459		1.07	0	0	5.04	7.47	3.69
ENSG00000164342	TLR3	7098	4	222.891	1360.92	-2.60653	0.120002	-21.7208	1.30475e-104	1.17465e-102		223.78	243.82	201.07	1412.66	1314.25	1355.85
ENSG00000165805	C12orf50	160419	12	0.376	5.322	-2.60547	0.943631	-2.76111	0.00576051	0.0166962		0	1.13	0	6.05	6.23	3.69
ENSG00000170271	FAXDC2	10826	5	6.442	43.834	-2.60388	0.359118	-7.25078	4.14378e-13	3.48122e-12		5.33	6.77	7.22	31.26	51.08	49.17
ENSG00000272512			1	52.954	327.466	-2.6009	0.227473	-11.4339	2.83025e-30	5.50876e-29		46.89	54.18	57.79	329.72	367.49	285.18
ENSG00000171303	KCNK3	3777	2	136.797	830.767	-2.60023	0.107698	-24.1436	8.72002e-129	1.06876e-126		136.4	134.33	139.66	862.12	758.65	871.53
ENSG00000168016	TRANK1	9881	3	2529.27	15484.6	-2.59927	0.158717	-16.3768	2.80237e-60	1.29201e-58		2684.31	2662.87	2240.63	14763.9	14673.5	17016.4
ENSG00000108950	FAM20A	54757	17	1.935	14.368	-2.59916	0.80792	-3.21711	0.00129491	0.00423338		1.07	1.13	3.61	17.14	11.21	14.75
ENSG00000163565	IFI16	3428	1	1299.34	7884.01	-2.59866	0.0576577	-45.0706	0	0		1341.62	1369.25	1187.14	7902.25	7855.6	7894.17
ENSG00000138435	CHRNA1	1134	2	0	3.153	-2.59692	0.947607	-2.7405	0.00613452	0.0176685		0	0	0	2.02	4.98	2.46
ENSG00000137959	IFI44L	10964	1	345.371	2088.45	-2.59619	0.0782537	-33.1766	2.34319e-241	7.25158e-239		321.82	392.83	321.47	2192.1	2100.31	1972.93
ENSG00000155918	RAET1L	154064	6	11.963	74.067	-2.59524	0.346936	-7.48046	7.4065e-14	6.57005e-13		12.79	14.67	8.43	67.56	74.74	79.9
ENSG00000258545	RHOXF1-AS1	101928969	X	1.868	14.026	-2.59395	0.756371	-3.42947	0.000604753	0.00208501		3.2	0	2.41	16.13	9.97	15.98
ENSG00000240065	PSMB9	5698	6	979.282	5926.72	-2.59389	0.0735033	-35.2894	8.55325e-273	3.36129e-270		954.8	1119.78	863.26	5808.96	6005.68	5965.5
ENSG00000251363	LINC02315		14	0	3.478	-2.59371	0.875464	-2.96267	0.0030498	0.00934145		0	0	0	3.02	2.49	4.92
ENSG00000090382	LYZ	4069	12	0.731	7.448	-2.59115	0.84396	-3.07023	0.00213892	0.00672878		1.07	1.13	0	16.13	4.98	1.23
ENSG00000236562	IFITM3P1		4	6.065	38.92	-2.58923	0.505026	-5.12692	2.94528e-07	1.52806e-06		5.33	5.64	7.22	36.3	42.35	38.11
ENSG00000198959	TGM2	7052	20	26102.3	156869	-2.58594	0.0480991	-53.7628	0	0		25548.4	27591.5	25167.1	152385	158431	159791
ENSG00000205220	PSMB10	5699	16	266.383	1602.92	-2.58416	0.093299	-27.6976	7.46014e-169	1.32876e-166		249.36	313.81	235.98	1580.05	1633.16	1595.55
ENSG00000204613	TRIM10	10107	6	0.731	8.043	-2.58379	0.701629	-3.68255	0.000230909	0.000850341		1.07	1.13	0	8.07	6.23	9.83
ENSG00000100191	SLC5A4	6527	22	0	3.336	-2.58194	0.872809	-2.9582	0.00309441	0.00946637		0	0	0	5.04	3.74	1.23
ENSG00000102003	SYP	6855	X	104.759	626.048	-2.57863	0.118479	-21.7646	5.02936e-105	4.57783e-103		88.45	116.27	109.56	645.33	641.55	591.26
ENSG00000234667	ACTL11P		3	0	3.399	-2.57553	0.993335	-2.59281	0.00951953	0.026266		0	0	0	4.03	1.25	4.92
ENSG00000125730	C3	718	19	1578.16	9408.12	-2.57385	0.0602101	-42.7478	0	0		1691.15	1415.53	1627.8	9912.85	8969.29	9342.22
ENSG00000059804	SLC2A3	6515	12	578.193	3437.9	-2.57039	0.0601361	-42.7429	0	0		578.63	558.76	597.18	3378.9	3485.56	3449.25
ENSG00000162892	IL24	11009	1	4.222	28.139	-2.57014	0.525343	-4.8923	9.96635e-07	4.87376e-06		2.13	4.52	6.02	20.17	24.91	39.34
ENSG00000205420	KRT6A	3853	12	3.022	20.38	-2.56702	0.533295	-4.81351	1.48304e-06	7.11296e-06		3.2	2.26	3.61	14.12	23.67	23.36
ENSG00000255398	HCAR3	8843	12	22.606	135.286	-2.56672	0.275707	-9.3096	1.2831e-20	1.67635e-19		21.31	24.83	21.67	137.13	149.49	119.24
ENSG00000130477	UNC13A	23025	19	388.058	2298.63	-2.56469	0.0823234	-31.1539	4.49367e-213	1.13525e-210		413.46	334.13	416.58	2392.76	2259.76	2243.36
ENSG00000283033			17	0.355	6.131	-2.56385	0.791035	-3.24114	0.00119053	0.00391695		1.07	0	0	6.05	3.74	8.6
ENSG00000126259	KIRREL2	84063	19	40.922	242.58	-2.56183	0.207355	-12.3548	4.59133e-35	1.03905e-33		42.63	25.96	54.18	249.06	224.23	254.45
ENSG00000132744	ACY3	91703	11	30.924	183.845	-2.55931	0.227893	-11.2303	2.8938e-29	5.39493e-28		31.97	27.09	33.71	191.58	169.42	190.53
ENSG00000169507	SLC38A11	151258	2	1.889	13.422	-2.55536	0.85695	-2.98193	0.00286442	0.00882056		2.13	1.13	2.41	13.11	8.72	18.44
ENSG00000230533			6	0.376	5.054	-2.55251	0.965488	-2.64375	0.00819942	0.023003		0	1.13	0	4.03	4.98	6.15
ENSG00000132026	RTBDN	83546	19	1.133	10.603	-2.55169	0.665063	-3.83677	0.000124665	0.000479413		1.07	1.13	1.2	7.06	12.46	12.29
ENSG00000253286			8	1.534	11.376	-2.55049	0.87042	-2.93018	0.00338767	0.0102822		1.07	1.13	2.41	8.07	18.69	7.38
ENSG00000118473	SGIP1	84251	1	0.401	5.401	-2.5498	1.01661	-2.50812	0.0121374	0.0327125		0	0	1.2	5.04	7.47	3.69
ENSG00000130775	THEMIS2	9473	1	242.68	1425.62	-2.54902	0.0979853	-26.0143	3.41045e-149	5.24447e-147		236.57	285.59	205.88	1422.75	1472.46	1381.66
ENSG00000120337	TNFSF18	8995	1	1.087	9.147	-2.54545	0.790759	-3.21899	0.00128642	0.00420839		2.13	1.13	0	10.08	11.21	6.15
ENSG00000116701	NCF2	4688	1	79.797	469.652	-2.54134	0.134555	-18.887	1.4595e-79	9.45924e-78		87.38	85.79	66.22	463.83	452.2	492.92
ENSG00000100290	BIK	638	22	23.212	138.476	-2.54119	0.221244	-11.4859	1.55299e-30	3.04666e-29		22.38	31.61	15.65	137.13	129.56	148.74
ENSG00000100604	CHGA	1113	14	38.698	228.857	-2.54007	0.25098	-10.1206	4.4773e-24	6.81728e-23		51.15	37.25	27.69	247.04	237.94	201.6
ENSG00000008118	CAMK1G	57172	1	1.154	9.131	-2.53741	0.88318	-2.87304	0.00406548	0.0121386		0	2.26	1.2	10.08	7.47	9.83
ENSG00000159403	C1R	715	12	2320.31	13481.5	-2.53731	0.0439935	-57.6746	0	0		2409.38	2325.35	2226.18	13765.7	13237.2	13441.7
ENSG00000287485			6	2.266	15.944	-2.53655	0.819102	-3.09674	0.00195663	0.00619464		2.13	2.26	2.41	18.15	13.7	15.98
ENSG00000141497	ZMYND15	84225	17	24.232	142.246	-2.53265	0.294546	-8.59847	8.07856e-18	9.09132e-17		20.25	25.96	26.49	137.13	148.24	141.36
ENSG00000123612	ACVR1C	130399	2	0.401	5.642	-2.53257	0.774446	-3.27017	0.00107485	0.00355953		0	0	1.2	7.06	2.49	7.38
ENSG00000136931	NR5A1	2516	9	0.401	5.232	-2.53194	0.90381	-2.80141	0.00508793	0.0148985		0	0	1.2	7.06	2.49	6.15
ENSG00000127129	EDN2	1907	1	28.53	167.133	-2.5274	0.238113	-10.6143	2.55684e-26	4.28587e-25		22.38	27.09	36.12	141.17	190.6	169.64
ENSG00000243753	HLA-L	3139	6	71.116	417.255	-2.52482	0.238163	-10.6012	2.94067e-26	4.91262e-25		67.13	64.34	81.87	406.36	440.99	404.42
ENSG00000095370	SH2D3C	10044	9	0.778	8.532	-2.52258	0.720825	-3.49957	0.000466012	0.00163606		0	1.13	1.2	7.06	7.47	11.06
ENSG00000054179	ENTPD2	954	9	6.839	42.118	-2.52098	0.432934	-5.82302	5.77947e-09	3.52868e-08		4.26	9.03	7.22	48.4	38.62	39.34
ENSG00000177133	PRDM16-DT	440556	1	1.467	11.843	-2.52038	0.950419	-2.65186	0.0080049	0.0225159		3.2	0	1.2	7.06	14.95	13.52
ENSG00000275591	XKR5	389610	8	0	3.74	-2.51928	1.02778	-2.45118	0.014239	0.037728		0	0	0	5.04	2.49	3.69
ENSG00000198963	RORB	6096	9	0.71	6.893	-2.51771	0.740251	-3.40116	0.000671013	0.00229778		2.13	0	0	7.06	7.47	6.15
ENSG00000173546	CSPG4	1464	15	3.022	21.255	-2.51254	0.465857	-5.39337	6.91471e-08	3.80601e-07		3.2	2.26	3.61	24.2	17.44	22.13
ENSG00000127399	LRRC61	65999	7	1.108	11.62	-2.5109	0.583669	-4.30192	1.69324e-05	7.22281e-05		1.07	2.26	0	15.12	4.98	14.75
ENSG00000204610	TRIM15	89870	6	0.778	7.786	-2.51004	0.696133	-3.60569	0.00031133	0.00112311		0	1.13	1.2	6.05	7.47	9.83
ENSG00000008311	AASS	10157	7	1.982	14.012	-2.50929	0.565012	-4.44113	8.94869e-06	3.9429e-05		0	1.13	4.82	11.09	16.19	14.75
ENSG00000165807	PPP1R36	145376	14	2.596	18.056	-2.49912	0.533572	-4.68375	2.81674e-06	1.31554e-05		3.2	3.39	1.2	17.14	11.21	25.81
ENSG00000006747	SCIN	85477	7	10.178	59.468	-2.49556	0.304974	-8.18285	2.77219e-16	2.86691e-15		11.72	6.77	12.04	59.49	68.52	50.4
ENSG00000255750			12	0.401	5.054	-2.49199	0.91518	-2.72294	0.00647029	0.0185548		0	0	1.2	4.03	4.98	6.15
ENSG00000227482			9	0.731	7.229	-2.49083	0.726391	-3.42905	0.000605703	0.002088		1.07	1.13	0	8.07	7.47	6.15
ENSG00000279805			22	0.355	4.808	-2.48658	0.994611	-2.50005	0.0124176	0.0333734		1.07	0	0	2.02	8.72	3.69
ENSG00000254231		105375624	8	3.285	21.69	-2.48261	0.589008	-4.21489	2.49898e-05	0.000104686		6.39	2.26	1.2	29.24	13.7	22.13
ENSG00000179826	MRGPRX3	117195	11	0	3.068	-2.4818	0.888061	-2.79463	0.00519591	0.0151949		0	0	0	3.02	2.49	3.69
ENSG00000144035	NAT8	9027	2	1.087	11.048	-2.47978	1.03846	-2.38795	0.0169428	0.0440572		2.13	1.13	0	12.1	11.21	9.83
ENSG00000254154	CRYZL2P-SEC16B		1	4.109	25.772	-2.47943	0.562468	-4.40812	1.0427e-05	4.54814e-05		5.33	3.39	3.61	25.21	36.13	15.98
ENSG00000197249	SERPINA1	5265	14	3.466	21.687	-2.47878	0.556965	-4.45051	8.56653e-06	3.78462e-05		1.07	4.52	4.82	24.2	22.42	18.44
ENSG00000173262	SLC2A14	144195	12	1.488	10.36	-2.47536	0.816096	-3.03317	0.00241998	0.00754867		2.13	1.13	1.2	10.08	7.47	13.52
ENSG00000137699	TRIM29	23650	11	28.679	161.535	-2.47349	0.232739	-10.6278	2.21382e-26	3.72097e-25		28.77	25.96	31.3	175.45	139.52	169.64
ENSG00000151883	PARP8	79668	5	13.179	77.017	-2.47269	0.258886	-9.55124	1.28149e-21	1.76457e-20		15.98	7.9	15.65	88.73	72.25	70.07
ENSG00000285888			6	0	2.842	-2.47138	0.942177	-2.62305	0.00871462	0.0242668		0	0	0	6.05	1.25	1.23
ENSG00000281100			3	14.701	84.688	-2.46987	0.432492	-5.71078	1.12458e-08	6.68644e-08		13.85	15.8	14.45	67.56	67.27	119.24
ENSG00000255158			11	0	2.989	-2.46894	0.985611	-2.50498	0.0122457	0.0329721		0	0	0	4.03	1.25	3.69
ENSG00000179593	ALOX15B	247	17	0	3.085	-2.46625	0.938511	-2.62783	0.00859309	0.0239662		0	0	0	3.02	6.23	0
ENSG00000189377	CXCL17	284340	19	0.803	6.961	-2.46388	0.860627	-2.86288	0.00419803	0.0124937		0	0	2.41	6.05	6.23	8.6
ENSG00000008056	SYN1	6853	X	2.216	15.125	-2.4628	0.718796	-3.42628	0.000611915	0.00210882		2.13	4.52	0	18.15	13.7	13.52
ENSG00000265096	C1QTNF1-AS1		17	1.957	12.783	-2.46243	0.765615	-3.21627	0.00129867	0.00424454		0	2.26	3.61	11.09	16.19	11.06
ENSG00000135960	EDAR	10913	2	3.775	22.96	-2.45774	0.642811	-3.82342	0.000131614	0.000504881		3.2	4.52	3.61	24.2	32.39	12.29
ENSG00000084628	NKAIN1	79570	1	33.408	183.867	-2.45722	0.215745	-11.3895	4.71697e-30	9.06698e-29		25.58	36.12	38.53	191.58	174.4	185.62
ENSG00000173930	SLCO4C1	353189	5	1.513	10.734	-2.4554	0.653876	-3.75514	0.000173244	0.000652446		2.13	0	2.41	11.09	16.19	4.92
ENSG00000167083	GNGT2	2793	17	1.534	10.376	-2.45193	0.785477	-3.12158	0.00179884	0.00573175		1.07	1.13	2.41	10.08	11.21	9.83
ENSG00000168843	FSTL5	56884	4	0	3.331	-2.45103	1.00098	-2.44864	0.0143397	0.0379865		0	0	0	5.04	2.49	2.46
ENSG00000164318	EGFLAM	133584	5	0	3.221	-2.45062	0.917982	-2.66957	0.00759473	0.0214647		0	0	0	1.01	3.74	4.92
ENSG00000232871	SEC1P	653677	19	0.376	5.011	-2.44791	0.940917	-2.60162	0.00927835	0.0256606		0	1.13	0	10.08	2.49	2.46
ENSG00000233030			1	1.108	8.458	-2.44747	0.797307	-3.06968	0.00214291	0.00674045		1.07	2.26	0	8.07	7.47	9.83
ENSG00000144406	UNC80	285175	2	0	3.237	-2.4471	0.931274	-2.62769	0.00859658	0.0239732		0	0	0	1.01	7.47	1.23
ENSG00000273183			7	0.401	4.833	-2.44653	0.915983	-2.67093	0.0075641	0.0213854		0	0	1.2	7.06	4.98	2.46
ENSG00000136244	IL6	3569	7	40.541	225.677	-2.44569	0.199072	-12.2854	1.08451e-34	2.43209e-33		54.35	38.38	28.9	223.85	247.9	205.28
ENSG00000138741	TRPC3	7222	4	0	2.915	-2.4453	0.992366	-2.46411	0.0137356	0.036525		0	0	0	5.04	1.25	2.46
ENSG00000276718			12	5.242	32.111	-2.44429	0.648629	-3.76839	0.000164302	0.000621133		6.39	4.52	4.82	39.32	34.88	22.13
ENSG00000125084	WNT1	7471	12	0.376	4.565	-2.44382	0.991778	-2.46409	0.0137364	0.036525		0	1.13	0	5.04	3.74	4.92
ENSG00000114248	LRRC31	79782	3	0.731	7.444	-2.44304	1.02443	-2.38477	0.0170897	0.0444019		1.07	1.13	0	5.04	6.23	11.06
ENSG00000107593	PKD2L1	9033	10	0.778	7.051	-2.4414	0.966466	-2.52611	0.0115335	0.0312481		0	1.13	1.2	5.04	9.97	6.15
ENSG00000162645	GBP2	2634	1	51.247	280.07	-2.44013	0.147614	-16.5305	2.21296e-61	1.05566e-59		53.28	46.28	54.18	310.56	266.59	263.06
ENSG00000229052			1	0	3.551	-2.43001	1.02972	-2.35988	0.0182809			0	0	0	2.02	2.49	6.15
ENSG00000151490	PTPRO	5800	12	0.355	4.497	-2.4251	0.877529	-2.76355	0.00571762	0.0165816		1.07	0	0	6.05	4.98	2.46
ENSG00000160183	TMPRSS3	64699	21	6.747	37.708	-2.42452	0.38816	-6.2462	4.20551e-10	2.82321e-09		6.39	9.03	4.82	46.38	27.41	39.34
ENSG00000163286	ALPG	251	2	1.935	13.45	-2.42425	0.612327	-3.95908	7.52394e-05	0.000296857		1.07	1.13	3.61	13.11	14.95	12.29
ENSG00000143469	SYT14	255928	1	2.266	14.28	-2.42325	0.606744	-3.99385	6.50084e-05	0.000258883		2.13	2.26	2.41	13.11	17.44	12.29
ENSG00000122756	CNTFR	1271	9	1.559	10.792	-2.42221	0.85022	-2.84892	0.00438684	0.0130087		1.07	0	3.61	10.08	12.46	9.83
ENSG00000273805			12	0.731	6.142	-2.42173	0.867996	-2.79002	0.00527046	0.0153948		1.07	1.13	0	6.05	6.23	6.15
ENSG00000103241	FOXF1	2294	16	0	8.385	-2.41894	0.841581	-2.87428	0.00404951			0	0	0	9.07	7.47	8.6
ENSG00000185245	GP1BA	2811	17	0.355	5.538	-2.41745	1.03842	-2.328	0.0199119			1.07	0	0	3.02	4.98	8.6
ENSG00000138623	SEMA7A	8482	15	64.667	349.276	-2.41569	0.130914	-18.4525	4.97931e-76	3.05143e-74		59.68	80.15	54.18	333.76	362.51	351.56
ENSG00000108242	CYP2C18	1562	10	0	3.331	-2.41541	1.01742	-2.37404	0.0175945	0.0455797		0	0	0	5.04	2.49	2.46
ENSG00000196970	NXF4	55999	X	0	3.494	-2.41476	1.033	-2.33762	0.0194068	0.0497075		0	0	0	3.02	6.23	1.23
ENSG00000256694			12	1.797	12.125	-2.41303	0.806617	-2.99154	0.00277572	0.00856448		4.26	1.13	0	14.12	9.97	12.29
ENSG00000225978	HAR1A		20	1.889	12.373	-2.4091	0.74172	-3.24799	0.00116225	0.00383154		2.13	1.13	2.41	11.09	16.19	9.83
ENSG00000120057	SFRP5	6425	10	31.181	167.304	-2.40777	0.31392	-7.66999	1.72004e-14	1.58839e-13		20.25	38.38	34.92	179.48	120.84	201.6
ENSG00000142700	DMRTA2	63950	1	8.18	46.044	-2.40745	0.336734	-7.14941	8.71518e-13	7.13763e-12		13.85	2.26	8.43	51.42	49.83	36.88
ENSG00000204963	PCDHA7	56141	5	4.531	25.843	-2.40692	0.443985	-5.42117	5.92118e-08	3.28692e-07		4.26	4.52	4.82	29.24	26.16	22.13
ENSG00000204103	MAFB	9935	20	0.731	7.687	-2.40456	0.711611	-3.37904	0.000727406	0.0024782		1.07	1.13	0	2.02	11.21	9.83
ENSG00000137727	ARHGAP20	57569	11	0.401	4.97	-2.39794	0.786269	-3.04977	0.00229016	0.00717175		0	0	1.2	5.04	2.49	7.38
ENSG00000164530	PI16	221476	6	0.778	6.729	-2.38945	0.783505	-3.04969	0.00229079	0.00717281		0	1.13	1.2	9.07	3.74	7.38
ENSG00000154655	L3MBTL4	91133	18	0	6.614	-2.38871	0.881167	-2.71085	0.00671118			0	0	0	5.04	3.74	11.06
ENSG00000100365	NCF4	4689	22	0.376	4.565	-2.38863	0.951726	-2.50978	0.0120806	0.0325771		0	1.13	0	5.04	3.74	4.92
ENSG00000137877	SPTBN5	51332	15	27.848	148.796	-2.38614	0.228435	-10.4456	1.53432e-25	2.48441e-24		27.71	29.35	26.49	133.1	173.16	140.13
ENSG00000106018	VIPR2	7434	7	0	4.639	-2.3847	1.0359	-2.30205	0.0213322	0.0540135		0	0	0	4.03	3.74	6.15
ENSG00000070019	GUCY2C	2984	12	0	3.551	-2.38363	1.03468	-2.30374	0.0212372			0	0	0	2.02	2.49	6.15
ENSG00000243225			14	0.778	6.068	-2.38279	0.913376	-2.60877	0.0090868	0.0252153		0	1.13	1.2	7.06	6.23	4.92
ENSG00000225968	ELFN1	392617	7	3.331	19.569	-2.38143	0.608545	-3.91332	9.10351e-05	0.000355945		5.33	2.26	2.41	19.16	16.19	23.36
ENSG00000005001	PRSS22	64063	16	6.83	38.049	-2.3802	0.356973	-6.66774	2.59764e-11	1.91121e-10		8.53	1.13	10.84	37.31	47.34	29.5
ENSG00000204866	IGFL2	147920	19	2.337	14.51	-2.37735	0.815969	-2.91353	0.00357369	0.0107914		1.07	1.13	4.82	15.12	9.97	18.44
ENSG00000236908	LINC02827		12	0.753	6.625	-2.37646	0.75913	-3.13051	0.00174502	0.00557821		0	2.26	0	5.04	6.23	8.6
ENSG00000260903	XKR7	343702	20	0.401	5.164	-2.37477	1.03952	-2.28449	0.022343			0	0	1.2	8.07	3.74	3.69
ENSG00000198719	DLL1	28514	6	22.841	120.082	-2.37424	0.322963	-7.35145	1.96069e-13	1.69138e-12		17.05	22.58	28.9	130.07	115.85	114.32
ENSG00000178826	TMEM139	135932	7	31.143	164.622	-2.37416	0.188973	-12.5635	3.35179e-36	7.95625e-35		23.44	33.86	36.12	146.21	169.42	178.24
ENSG00000230666	CEACAM22P	388550	19	0.376	5.653	-2.37106	0.73694	-3.21744	0.0012934	0.00422899		0	1.13	0	7.06	4.98	4.92
ENSG00000189280	GJB5	2709	1	0	4.167	-2.37072	0.802585	-2.95386	0.00313825	0.00958747		0	0	0	5.04	6.23	1.23
ENSG00000287300			6	2.55	16.286	-2.36998	0.761486	-3.11231	0.00185629	0.00590265		4.26	3.39	0	19.16	14.95	14.75
ENSG00000148204	CRB2	286204	9	1.982	12.289	-2.36763	0.728717	-3.24903	0.00115799	0.00381902		0	1.13	4.82	12.1	13.7	11.06
ENSG00000121905	HPCA	3208	1	3.398	20.425	-2.36529	0.560942	-4.21663	2.47975e-05	0.000103969		3.2	3.39	3.61	24.2	14.95	22.13
ENSG00000265972	TXNIP	10628	1	28.516	150.527	-2.36269	0.190882	-12.3778	3.44769e-35	7.86709e-34		31.97	27.09	26.49	152.26	139.52	159.8
ENSG00000143355	LHX9	56956	1	15.548	82.852	-2.36238	0.392557	-6.01792	1.76671e-09	1.12936e-08		25.58	9.03	12.04	82.68	87.2	78.67
ENSG00000257114	LINC02450	105369739	12	3.829	21.092	-2.36199	0.550859	-4.28782	1.80432e-05	7.68078e-05		4.26	0	7.22	26.22	13.7	23.36
ENSG00000243749	TMEM35B	100506144	1	13.661	73.155	-2.36089	0.32753	-7.20817	5.67095e-13	4.72572e-12		10.66	14.67	15.65	63.52	79.73	76.21
ENSG00000230140	NPAS2-AS1		2	0	2.653	-2.35805	0.967257	-2.43788	0.0147739	0.0390322		0	0	0	3.02	1.25	3.69
ENSG00000160932	LY6E	4061	8	7084.85	36360.3	-2.35695	0.0713682	-33.0253	3.52606e-239	1.06461e-236		6410.81	7831.7	7012.06	37201.2	35365.1	36514.6
ENSG00000137965	IFI44	10561	1	864.962	4432.18	-2.35622	0.0591496	-39.8349	0	0		879.14	884.99	830.76	4501.17	4468.45	4326.92
ENSG00000237276	ANO7L1		1	38.792	200.664	-2.35614	0.221955	-10.6154	2.52732e-26	4.23926e-25		36.23	44.02	36.12	205.7	221.74	174.55
ENSG00000261371	PECAM1	5175	17	2.198	14.043	-2.35214	0.574249	-4.09603	4.20288e-05	0.000171284		4.26	1.13	1.2	16.13	13.7	12.29
ENSG00000163131	CTSS	1520	1	1155.11	5904.68	-2.35153	0.0624854	-37.6333	0	0		1210.55	1197.67	1057.11	6232.46	5607.05	5874.53
ENSG00000137507	LRRC32	2615	11	2.198	14.075	-2.35052	0.641357	-3.66492	0.000247415	0.000907213		4.26	1.13	1.2	10.08	13.7	18.44
ENSG00000007264	MATK	4145	19	4.08	22.99	-2.34649	0.59865	-3.91963	8.86846e-05	0.000347029		4.26	6.77	1.2	23.19	22.42	23.36
ENSG00000135373	EHF	26298	11	170.5	866.447	-2.34358	0.127281	-18.4126	1.0411e-75	6.36432e-74		173.7	134.33	203.47	979.08	844.61	775.65
ENSG00000087085	ACHE	43	7	27.166	140.235	-2.34177	0.262878	-8.90823	5.1856e-19	6.23228e-18		26.64	25.96	28.9	137.13	156.96	126.61
ENSG00000135363	LMO2	4005	11	56.175	286.546	-2.34069	0.212424	-11.0189	3.09693e-28	5.54401e-27		62.87	58.7	46.96	301.49	284.03	274.12
ENSG00000171951	SCG2	7857	2	327.113	1663.53	-2.34047	0.0951521	-24.5971	1.35678e-133	1.7587e-131		355.92	335.26	290.16	1657.69	1610.73	1722.16
ENSG00000148357	HMCN2	256158	9	1.53	10.75	-2.33906	0.652351	-3.58559	0.000336322	0.00120676		0	3.39	1.2	5.04	12.46	14.75
ENSG00000105278	ZFR2	23217	19	1.179	8.964	-2.33152	0.645335	-3.61288	0.000302813	0.00109398		0	1.13	2.41	7.06	12.46	7.38
ENSG00000168394	TAP1	6890	6	4883.36	24602.5	-2.33145	0.0519614	-44.8689	0	0		4601.37	5492.8	4555.91	24312.8	24366.6	25128.1
ENSG00000116962	NID1	4811	1	829.828	4183.81	-2.33126	0.0679948	-34.2859	1.27189e-257	4.49851e-255		848.24	864.67	776.58	4083.72	4044.9	4422.8
ENSG00000164188	RANBP3L	202151	5	0	3.967	-2.3303	1.03879	-2.24329	0.0248784			0	0	0	2.02	3.74	6.15
ENSG00000141485	SLC13A5	284111	17	5.735	30.619	-2.32361	0.627554	-3.70264	0.000213366	0.000791271		4.26	4.52	8.43	37.31	34.88	19.67
ENSG00000238015			1	0	2.726	-2.32336	1.00537	-2.31096	0.0208351	0.0528899		0	0	0	2.02	1.25	4.92
ENSG00000271344			7	1.484	9.819	-2.32084	0.790627	-2.93544	0.00333073	0.0101218		1.07	3.39	0	12.1	11.21	6.15
ENSG00000177409	SAMD9L	219285	7	1269.4	6350.72	-2.32015	0.0693155	-33.4724	1.2168e-245	3.9124e-243		1311.79	1311.68	1184.73	6291.95	6366.95	6393.27
ENSG00000196954	CASP4	837	11	214.661	1074.86	-2.31931	0.0951792	-24.3678	3.75812e-131	4.72303e-129		209.93	243.82	190.23	1182.77	1023.99	1017.81
ENSG00000105707	HPN	3249	19	0	3.336	-2.31894	0.83882	-2.76453	0.00570047	0.0165376		0	0	0	5.04	3.74	1.23
ENSG00000172159	FRMD3	257019	9	52.612	266.218	-2.31723	0.178087	-13.0118	1.04861e-38	2.68474e-37		69.27	44.02	44.55	279.31	231.71	287.64
ENSG00000140853	NLRC5	84166	16	1502.98	7483.38	-2.31405	0.0534253	-43.3139	0	0		1476.96	1622.1	1409.88	7431.36	7606.45	7412.31
ENSG00000168062	BATF2	116071	11	1108.49	5521.59	-2.3128	0.0808711	-28.5986	7.0035e-180	1.32361e-177		1119.97	1250.72	954.77	5411.68	5676.81	5476.26
ENSG00000185985	SLITRK2	84631	X	0	4.907	-2.31076	1.02769	-2.24849	0.0245449			0	0	0	6.05	4.98	3.69
ENSG00000142449	FBN3	84467	19	0.355	4.587	-2.30995	0.986742	-2.34099	0.0192327	0.0493128		1.07	0	0	5.04	8.72	0
ENSG00000259498	TPM1-AS		15	4.197	23.333	-2.30955	0.5917	-3.90323	9.49158e-05	0.000370183		2.13	5.64	4.82	13.11	26.16	30.73
ENSG00000276980			19	3.758	20.948	-2.30948	0.660147	-3.49843	0.00046801	0.00164284		5.33	1.13	4.82	39.32	12.46	11.06
ENSG00000204592	HLA-E	3133	6	5088.16	25195.1	-2.30707	0.0419098	-55.0484	0	0		4971.15	5362.99	4930.35	25536.8	25166.3	24882.3
ENSG00000081985	IL12RB2	3595	1	0.71	6.45	-2.30559	0.982324	-2.34708	0.0189212	0.0486247		2.13	0	0	7.06	0	12.29
ENSG00000168309	FAM107A	11170	3	0.355	4.24	-2.3049	0.928072	-2.48353	0.0130087	0.0348069		1.07	0	0	4.03	6.23	2.46
ENSG00000176998	HCG4		6	0.401	6.221	-2.30441	0.703663	-3.27488	0.00105708	0.00350725		0	0	1.2	5.04	7.47	6.15
ENSG00000188290	HES4	57801	1	380.298	1895.78	-2.29965	0.185854	-12.3734	3.64124e-35	8.29345e-34		337.8	433.46	369.63	2007.58	1905.97	1773.79
ENSG00000275367			12	0.376	4.639	-2.29815	1.02146	-2.24986	0.0244579	0.0609551		0	1.13	0	4.03	3.74	6.15
ENSG00000079263	SP140	11262	2	7.39	38.129	-2.29541	0.396301	-5.79209	6.95159e-09	4.21007e-08		10.66	7.9	3.61	46.38	29.9	38.11
ENSG00000262406	MMP12	4321	11	0	4.746	-2.29494	1.02546	-2.23796	0.0252239			0	0	0	3.02	11.21	0
ENSG00000204261	PSMB8-AS1	100507463	6	117.278	576.48	-2.29437	0.126748	-18.1019	3.07834e-73	1.82329e-71		108.69	127.56	115.58	558.61	601.69	569.14
ENSG00000225527			10	0	3.153	-2.2902	1.03733	-2.20779	0.0272589			0	0	0	2.02	4.98	2.46
ENSG00000223485	LINC01615		6	1.158	8.011	-2.29016	0.669836	-3.41899	0.000628544	0.00216402		1.07	0	2.41	14.12	6.23	3.69
ENSG00000182782	HCAR2	338442	12	42.337	210.679	-2.28733	0.267429	-8.55305	1.19878e-17	1.3345e-16		38.36	60.96	27.69	192.59	231.71	207.74
ENSG00000271554			1	0	4.754	-2.28586	1.02202	-2.23661	0.0253118			0	0	0	8.07	3.74	2.46
ENSG00000172243	CLEC7A	64581	12	1.559	8.946	-2.28577	0.66519	-3.43626	0.000589794	0.00203826		1.07	0	3.61	18.15	6.23	2.46
ENSG00000101197	BIRC7	79444	20	62.698	305.821	-2.28246	0.194662	-11.7252	9.46257e-32	1.93296e-30		56.48	48.54	83.08	320.65	326.38	270.43
ENSG00000163644	PPM1K	152926	4	207.195	1012.33	-2.28157	0.10458	-21.8164	1.62043e-105	1.4914e-103		205.67	226.89	189.03	952.87	1062.61	1021.5
ENSG00000231083			2	2.596	14.507	-2.27954	0.777485	-2.93194	0.00336853	0.0102279		3.2	3.39	1.2	10.08	18.69	14.75
ENSG00000070731	ST6GALNAC2	10610	17	2.596	15.882	-2.27879	0.515067	-4.42425	9.67757e-06	4.24216e-05		3.2	3.39	1.2	19.16	16.19	12.29
ENSG00000248211	TRPC7-AS1		5	0.376	4.145	-2.27831	0.96492	-2.36114	0.0182187	0.0470075		0	1.13	0	5.04	1.25	6.15
ENSG00000250133	HOXC-AS2	100874364	12	19.53	96.616	-2.27679	0.303993	-7.4896	6.90812e-14	6.14778e-13		17.05	27.09	14.45	96.8	97.17	95.88
ENSG00000072858	SIDT1	54847	3	124.348	604.062	-2.27678	0.121397	-18.7548	1.76952e-78	1.13497e-76		134.27	120.78	117.99	612.05	586.74	613.39
ENSG00000181126	HLA-V	352962	6	2.27	14.778	-2.27502	0.518688	-4.38611	1.15394e-05	5.00864e-05		3.2	0	3.61	17.14	11.21	15.98
ENSG00000262343			17	0.355	4.376	-2.27427	0.978759	-2.32362	0.0201457	0.0513929		1.07	0	0	2.02	3.74	7.38
ENSG00000102349	KLF8	11279	X	1.158	8.065	-2.27421	0.668511	-3.4019	0.000669185	0.00229247		1.07	0	2.41	8.07	11.21	4.92
ENSG00000107159	CA9	768	9	42.246	205.396	-2.27307	0.189145	-12.0176	2.87267e-33	6.13646e-32		27.71	49.67	49.36	196.62	215.51	204.05
ENSG00000072832	CRMP1	1400	4	30.368	147.546	-2.27299	0.262302	-8.66555	4.49354e-18	5.16486e-17		30.9	36.12	24.08	143.18	149.49	149.97
ENSG00000165685	TMEM52B	120939	12	1.087	8.357	-2.27188	0.640788	-3.54545	0.000391943	0.00139201		2.13	1.13	0	9.07	1.25	14.75
ENSG00000237836	PHKA2-AS1		X	1.488	10.119	-2.27178	0.779336	-2.91503	0.0035566	0.0107462		2.13	1.13	1.2	8.07	12.46	9.83
ENSG00000171385	KCND3	3752	1	0.401	4.218	-2.27162	0.857108	-2.65034	0.00804116	0.0226051		0	0	1.2	4.03	1.25	7.38
ENSG00000244009	B3GAT3P1		3	0	2.732	-2.26804	0.968782	-2.34112	0.0192258	0.0493002		0	0	0	2.02	2.49	3.69
ENSG00000198758	EPS8L3	79574	1	15.199	73.103	-2.26511	0.339776	-6.66649	2.61992e-11	1.92589e-10		12.79	13.55	19.26	91.76	71.01	56.55
ENSG00000133962	CATSPERB	79820	14	0.355	4.172	-2.26324	0.849573	-2.66398	0.00772231	0.0217865		1.07	0	0	5.04	7.47	0
ENSG00000117595	IRF6	3664	1	4.84	26.625	-2.2626	0.392654	-5.76233	8.29616e-09	4.99383e-08		6.39	4.52	3.61	35.29	24.91	19.67
ENSG00000196503	ARL9	132946	4	1.864	11.144	-2.2616	0.741104	-3.05166	0.00227577	0.0071321		2.13	2.26	1.2	11.09	16.19	6.15
ENSG00000225864			6	0	3.399	-2.26118	1.04082	-2.17249	0.0298187			0	0	0	4.03	1.25	4.92
ENSG00000115267	IFIH1	64135	2	2993.46	14364	-2.26025	0.0633963	-35.6527	2.1401e-278	8.83076e-276		3096.71	3239.69	2643.97	13973.4	14516.5	14602.1
ENSG00000186212	SOWAHB	345079	4	2.951	15.734	-2.25905	0.528253	-4.27645	1.89897e-05	8.06427e-05		4.26	3.39	1.2	21.17	16.19	9.83
ENSG00000249947	XBP1P1		5	0	2.8	-2.25799	0.968939	-2.33037	0.0197865	0.0505964		0	0	0	1.01	1.25	6.15
ENSG00000126561	STAT5A	6776	17	243.943	1165.48	-2.25523	0.0869453	-25.9385	2.45234e-148	3.70213e-146		232.31	255.11	244.41	1196.88	1179.71	1119.84
ENSG00000267688			19	0	2.653	-2.25504	1.00885	-2.23526	0.0254005	0.0630125		0	0	0	3.02	1.25	3.69
ENSG00000268460		93429	19	16.293	80.146	-2.25203	0.286489	-7.86081	3.81655e-15	3.65533e-14		23.44	15.8	9.63	74.62	83.46	82.36
ENSG00000140945	CDH13	1012	16	0.355	3.672	-2.25129	0.892981	-2.5211	0.0116989	0.0316478		1.07	0	0	6.05	3.74	1.23
ENSG00000287484			11	1.133	8.106	-2.2495	0.756248	-2.97456	0.0029341	0.00902056		1.07	1.13	1.2	7.06	3.74	13.52
ENSG00000129675	ARHGEF6	9459	X	18.732	89.431	-2.24944	0.259328	-8.6741	4.1682e-18	4.79759e-17		11.72	19.19	25.28	88.73	99.66	79.9
ENSG00000185339	TCN2	6948	22	318.126	1513.58	-2.24767	0.0785154	-28.6272	3.08417e-180	5.87368e-178		314.36	333	307.02	1540.72	1537.24	1462.79
ENSG00000287514			9	0	3.404	-2.24605	1.04007	-2.15952	0.0308101			0	0	0	4.03	2.49	3.69
ENSG00000231535	LINC00278	100873962	Y	2.617	13.658	-2.24339	0.581013	-3.86116	0.000112848	0.000436478		2.13	4.52	1.2	21.17	9.97	9.83
ENSG00000197457	STMN3	50861	20	642.931	3048	-2.24328	0.0652704	-34.369	7.33231e-259	2.66961e-256		610.6	671.64	646.54	2855.58	3129.28	3159.14
ENSG00000151023	ENKUR	219670	10	17.127	82.606	-2.24206	0.300652	-7.45733	8.82953e-14	7.79437e-13		11.72	19.19	20.47	80.67	90.94	76.21
ENSG00000226421	SLC25A5P5		7	3.491	17.71	-2.23997	0.579329	-3.86649	0.000110414	0.000427265		1.07	3.39	6.02	22.18	16.19	14.75
ENSG00000260496			16	0.355	5.218	-2.2399	1.03911	-2.15559	0.0311157			1.07	0	0	2.02	8.72	4.92
ENSG00000173200	PARP15	165631	3	0	2.737	-2.23986	1.02006	-2.19582	0.0281047	0.06892		0	0	0	2.02	3.74	2.46
ENSG00000175093	SPSB4	92369	3	1.087	8.032	-2.23861	0.99596	-2.24769	0.0245958	0.0612618		2.13	1.13	0	8.07	3.74	12.29
ENSG00000108679	LGALS3BP	3959	17	13807.6	65116.6	-2.23641	0.0486552	-45.9646	0	0		13125.3	14804.4	13493.2	65090.4	64480.4	65779.1
ENSG00000105499	PLA2G4C	8605	19	112.912	535.217	-2.23606	0.141253	-15.8302	1.9257e-56	8.13591e-55		115.09	112.88	110.77	518.28	611.66	475.72
ENSG00000057704	TMCC3	57458	12	23.806	114.573	-2.23502	0.216042	-10.3453	4.39608e-25	6.98576e-24		20.25	27.09	24.08	119.99	93.43	130.3
ENSG00000258791	LINC00520	645687	14	4.159	21.487	-2.23083	0.580583	-3.84239	0.000121841	0.000469208		5.33	1.13	6.02	21.17	19.93	23.36
ENSG00000121966	CXCR4	7852	2	10.195	49.128	-2.22983	0.455588	-4.8944	9.86086e-07	4.8248e-06		9.59	10.16	10.84	54.45	56.06	36.88
ENSG00000185269	NOTUM	147111	17	10.537	51.924	-2.2297	0.34081	-6.54234	6.0565e-11	4.32123e-10		13.85	4.52	13.24	44.37	58.55	52.86
ENSG00000286978			4	0	2.401	-2.22833	0.926862	-2.40417	0.0162092	0.0423991		0	0	0	1.01	3.74	2.46
ENSG00000223466	LINC01825		2	0.731	6.068	-2.22249	0.788134	-2.81993	0.00480335	0.0141354		1.07	1.13	0	7.06	6.23	4.92
ENSG00000025708	TYMP	1890	22	1593.43	7459.95	-2.22247	0.100438	-22.1279	1.70512e-108	1.62994e-106		1442.86	1718.05	1619.37	7552.36	7828.19	6999.29
ENSG00000120949	TNFRSF8	943	1	18.246	87.489	-2.21219	0.290777	-7.60786	2.78673e-14	2.54027e-13		22.38	20.32	12.04	70.58	102.15	89.73
ENSG00000173821	RNF213	57674	17	23098.5	109954	-2.20885	0.287487	-7.68331	1.55035e-14	1.43705e-13		25035.8	22077.3	22182.4	100619	99332.3	129912
ENSG00000155265	GOLGA7B	401647	10	187.186	866.529	-2.20788	0.0999297	-22.0943	3.58368e-108	3.39941e-106		174.76	194.16	192.64	851.03	879.49	869.07
ENSG00000238045			16	80.775	376.728	-2.20609	0.179783	-12.2709	1.29833e-34	2.90633e-33		87.38	77.89	77.06	387.2	411.09	331.89
ENSG00000160182	TFF1	7031	21	30.109	139.186	-2.20534	0.255194	-8.64183	5.5319e-18	6.30275e-17		28.77	33.86	27.69	166.37	124.57	126.61
ENSG00000228737			5	1.108	7.297	-2.20496	0.807542	-2.73046	0.00632462	0.0181695		1.07	2.26	0	7.06	6.23	8.6
ENSG00000168453	HR	55806	8	476.598	2195.76	-2.20065	0.0991893	-22.1864	4.6456e-109	4.52818e-107		458.22	452.65	518.92	2274.78	2158.86	2153.63
ENSG00000187944	C2orf66	401027	2	1.108	7.665	-2.20034	0.820487	-2.68175	0.0073239	0.0207588		1.07	2.26	0	2.02	6.23	14.75
ENSG00000115009	CCL20	6364	2	19.863	93.265	-2.19953	0.284257	-7.73782	1.01138e-14	9.48113e-14		25.58	13.55	20.47	107.89	78.48	93.42
ENSG00000164128	NPY1R	4886	4	0	2.396	-2.19797	0.964619	-2.27859	0.0226917	0.0570531		0	0	0	1.01	2.49	3.69
ENSG00000060566	CREB3L3	84699	19	6.471	31.789	-2.19737	0.465421	-4.72124	2.34408e-06	1.10374e-05		6.39	3.39	9.63	26.22	23.67	45.48
ENSG00000183128	CALHM3	119395	10	5.166	26.733	-2.19664	0.478408	-4.59155	4.39959e-06	2.01229e-05		6.39	7.9	1.2	23.19	34.88	22.13
ENSG00000090539	CHRD	8646	3	2.997	15.63	-2.19505	0.599443	-3.66181	0.000250437	0.00091707		3.2	3.39	2.41	17.14	18.69	11.06
ENSG00000089356	FXYD3	5349	19	0	2.658	-2.19216	0.884411	-2.47867	0.0131875	0.0352358		0	0	0	3.02	2.49	2.46
ENSG00000112773	TENT5A	55603	6	239.418	1096.35	-2.19109	0.0761448	-28.7752	4.37924e-182	8.60485e-180		242.96	239.31	235.98	1082.94	1085.03	1121.07
ENSG00000162944	RFTN2	130132	2	1.509	8.548	-2.19084	0.870951	-2.51546	0.0118879	0.0321135		1.07	2.26	1.2	7.06	11.21	7.38
ENSG00000133317	LGALS12	85329	11	0	3.136	-2.18931	1.0357	-2.11385	0.0345277	0.082569		0	0	0	2.02	1.25	6.15
ENSG00000179331	RAB39A	54734	11	42.945	197.171	-2.1868	0.239443	-9.13286	6.67131e-20	8.39696e-19		46.89	34.99	46.96	222.84	178.14	190.53
ENSG00000169085	VXN	254778	8	0	2.647	-2.18349	1.01129	-2.15911	0.0308413	0.0748302		0	0	0	3.02	0	4.92
ENSG00000151025	GPR158	57512	10	1.931	12.376	-2.18084	0.530596	-4.11016	3.95381e-05	0.000161532		0	3.39	2.41	16.13	7.47	13.52
ENSG00000198788	MUC2	4583	11	13.644	62.701	-2.17777	0.374003	-5.82285	5.78534e-09	3.5314e-08		12.79	11.29	16.86	70.58	56.06	61.46
ENSG00000250584	LINC01511	100506791	5	0.376	4.565	-2.17604	0.762002	-2.85569	0.00429431	0.0127664		0	1.13	0	5.04	3.74	4.92
ENSG00000089116	LHX5	64211	12	0.401	6.625	-2.17528	0.958865	-2.26859	0.0232931			0	0	1.2	5.04	6.23	8.6
ENSG00000258602	LINC01629	105370578	14	1.957	10.696	-2.17262	0.72646	-2.9907	0.00278341	0.00858604		0	2.26	3.61	11.09	7.47	13.52
ENSG00000103489	XYLT1	64131	16	23.902	107.684	-2.17021	0.317838	-6.82804	8.60807e-12	6.58586e-11		19.18	24.83	27.69	113.94	103.4	105.71
ENSG00000175445	LPL	4023	8	0	2.39	-2.16962	0.98261	-2.20802	0.0272429	0.0670656		0	0	0	1.01	1.25	4.92
ENSG00000186831	KRT17P2		17	0	2.317	-2.16822	0.997529	-2.17359	0.0297357	0.0724459		0	0	0	2.02	1.25	3.69
ENSG00000185404	SP140L	93349	2	409.085	1838.7	-2.16597	0.0750255	-28.8698	2.85793e-183	5.66054e-181		401.74	440.24	385.28	1878.51	1783.89	1853.69
ENSG00000232508	MRPL45P1		2	0	2.506	-2.16581	1.02313	-2.11683	0.0342739	0.0820097		0	0	0	5.04	1.25	1.23
ENSG00000188676	IDO2	169355	8	2.951	15.141	-2.16571	0.727992	-2.97491	0.00293077	0.00901255		4.26	3.39	1.2	18.15	17.44	9.83
ENSG00000135312	HTR1B	3351	6	5.334	25.055	-2.16497	0.62321	-3.47391	0.000512938	0.00179091		4.26	4.52	7.22	23.19	26.16	25.81
ENSG00000144460	NYAP2	57624	2	1.53	8.568	-2.16456	0.698684	-3.09805	0.00194801	0.00617053		0	3.39	1.2	12.1	6.23	7.38
ENSG00000166257	SCN3B	55800	11	9.936	45.729	-2.1622	0.454845	-4.75372	1.99711e-06	9.46668e-06		7.46	7.9	14.45	44.37	47.34	45.48
ENSG00000160097	FNDC5	252995	1	6.036	29.233	-2.16072	0.418171	-5.16708	2.37779e-07	1.24697e-06		4.26	9.03	4.82	28.23	34.88	24.58
ENSG00000153923	CLCA3P	9629	1	0	2.475	-2.16031	0.942712	-2.29159	0.0219295	0.0553558		0	0	0	0	3.74	3.69
ENSG00000286707			2	0.753	5.317	-2.1597	0.776474	-2.78142	0.00541217	0.0157734		0	2.26	0	6.05	4.98	4.92
ENSG00000167614	TTYH1	57348	19	0.757	5.5	-2.15905	0.898895	-2.4019	0.0163104	0.0426187		1.07	0	1.2	9.07	3.74	3.69
ENSG00000279965			13	2.93	15.597	-2.1571	0.873752	-2.46878	0.0135573	0.0361266		5.33	2.26	1.2	17.14	11.21	18.44
ENSG00000287097		107986639	6	1.488	8.647	-2.1523	0.736922	-2.92066	0.00349292	0.010568		2.13	1.13	1.2	11.09	7.47	7.38
ENSG00000093072	ADA2	51816	22	1.509	8.696	-2.15185	0.851023	-2.52854	0.0114537	0.0310491		1.07	2.26	1.2	5.04	11.21	9.83
ENSG00000196859	KRT39	390792	17	0.376	4.35	-2.15102	1.02906	-2.09028	0.0365922	0.0868768		0	1.13	0	8.07	4.98	0
ENSG00000176402	GJC3	349149	7	3.043	15.089	-2.15095	0.654909	-3.28434	0.0010222	0.00339929		2.13	3.39	3.61	13.11	14.95	17.21
ENSG00000176406	RIMS2	9699	8	2.934	16.061	-2.15003	0.516928	-4.15924	3.19305e-05	0.000131989		6.39	0	2.41	11.09	16.19	20.9
ENSG00000254510			11	0.376	3.893	-2.14766	0.823886	-2.60674	0.00914088	0.0253464		0	1.13	0	3.02	3.74	4.92
ENSG00000227486			X	0.355	3.74	-2.14685	0.841348	-2.55167	0.0107206	0.0292411		1.07	0	0	5.04	2.49	3.69
ENSG00000231528	FAM225A	286333	9	0	3.399	-2.14577	0.814439	-2.63466	0.00842223	0.023548		0	0	0	4.03	1.25	4.92
ENSG00000162706	CADM3	57863	1	3.398	16.329	-2.14414	0.728871	-2.94173	0.00326383	0.00993556		3.2	3.39	3.61	13.11	17.44	18.44
ENSG00000261678	SCRT1	83482	8	0	2.328	-2.14282	0.973604	-2.20092	0.027742	0.068156		0	0	0	2.02	3.74	1.23
ENSG00000128394	APOBEC3F	200316	22	314.791	1392.87	-2.1413	0.0909879	-23.5339	1.83355e-122	2.15142e-120		334.61	317.2	292.57	1410.65	1371.55	1396.42
ENSG00000161973	CCDC42	146849	17	0.355	5.39	-2.14121	1.02452	-2.08998	0.03662			1.07	0	0	5.04	4.98	6.15
ENSG00000244731				3.089	15.43	-2.13569	0.582942	-3.66365	0.000248646	0.000911053		1.07	3.39	4.82	14.12	16.19	15.98
ENSG00000286966			1	0.401	3.735	-2.13565	0.918499	-2.32516	0.0200636	0.0512097		0	0	1.2	5.04	1.25	4.92
ENSG00000000971	CFH	3075	1	878.519	3852.84	-2.13242	0.0658883	-32.3641	8.78472e-230	2.4715e-227		908.98	830.81	895.77	4219.84	3536.64	3802.04
ENSG00000064300	NGFR	4804	17	16.637	74.878	-2.13219	0.358247	-5.95173	2.65328e-09	1.66768e-08		14.92	16.93	18.06	83.69	61.04	79.9
ENSG00000105642	KCNN1	3780	19	20.358	91.116	-2.13079	0.29034	-7.33895	2.15269e-13	1.84928e-12		17.05	25.96	18.06	87.72	93.43	92.19
ENSG00000170542	SERPINB9	5272	6	1102.57	4827.46	-2.12942	0.0570599	-37.3191	8.05288e-305	3.76176e-302		1114.64	1093.82	1099.25	4792.57	4713.86	4975.96
ENSG00000151414	NEK7	140609	1	474.829	2083.45	-2.12812	0.0816413	-26.0667	8.70163e-150	1.36351e-147		554.13	417.66	452.7	2142.69	2006.88	2100.77
ENSG00000173868	PHOSPHO1	162466	17	19.249	86.089	-2.12791	0.318518	-6.68065	2.37884e-11	1.75912e-10		22.38	11.29	24.08	83.69	94.68	79.9
ENSG00000257596	SCAT2	112935960	12	0.731	5.254	-2.12765	0.863381	-2.46433	0.0137271	0.0365121		1.07	1.13	0	7.06	7.47	1.23
ENSG00000187912	CLEC17A	388512	19	0.355	4.418	-2.1276	1.04	-2.04578	0.040778			1.07	0	0	7.06	3.74	2.46
ENSG00000130234	ACE2	59272	X	0	20.275	-2.12603	0.866222	-2.45437	0.0141133	0.0374069		0	0	0	21.17	23.67	15.98
ENSG00000150594	ADRA2A	150	10	1.154	6.718	-2.12421	0.750039	-2.83213	0.00462385	0.0136543		0	2.26	1.2	9.07	1.25	9.83
ENSG00000167850	CD300C	10871	17	2.713	13.193	-2.12388	0.7291	-2.91302	0.00357951	0.0108062		1.07	2.26	4.82	11.09	16.19	12.29
ENSG00000197536	IRF1-AS1		5	85.58	376.769	-2.12175	0.15893	-13.3502	1.18184e-40	3.21539e-39		104.43	81.27	71.04	345.86	386.18	398.27
ENSG00000145777	TSLP	85480	5	0.401	3.483	-2.11986	0.948853	-2.23413	0.0254743	0.0631766		0	0	1.2	3.02	3.74	3.69
ENSG00000204347	BTBD17	388419	17	0	6.808	-2.11944	0.801504	-2.64433	0.00818525			0	0	0	8.07	4.98	7.38
ENSG00000109072	VTN	7448	17	340.585	1478.99	-2.11919	0.0975752	-21.7186	1.37034e-104	1.22924e-102		330.34	302.52	388.89	1583.07	1455.02	1398.87
ENSG00000117226	GBP3	2635	1	339.103	1478.65	-2.11799	0.099549	-21.2759	1.89818e-100	1.58232e-98		362.31	379.28	275.71	1509.46	1461.25	1465.25
ENSG00000234289	H2BS1	54145	21	0	2.469	-2.11744	0.991425	-2.13575	0.0326994	0.0787876		0	0	0	0	2.49	4.92
ENSG00000107201	DDX58	23586	9	7222.41	31233	-2.11057	0.0623592	-33.8453	4.24872e-251	1.42148e-248		7262.24	7929.91	6475.08	30893.1	31585.6	31220.2
ENSG00000267922			19	0.757	5.139	-2.11015	0.959134	-2.20006	0.0278025	0.0682804		1.07	0	1.2	3.02	7.47	4.92
ENSG00000179776	CDH5	1003	16	5.33	25.134	-2.10756	0.423173	-4.98038	6.34589e-07	3.17141e-06		3.2	6.77	6.02	22.18	27.41	25.81
ENSG00000106384	MOGAT3	346606	7	0	2.506	-2.10742	1.03655	-2.03311	0.0420412			0	0	0	5.04	1.25	1.23
ENSG00000255355			11	0	2.243	-2.1057	0.986336	-2.13487	0.0327717	0.0789186		0	0	0	3.02	1.25	2.46
ENSG00000140105	WARS1	7453	14	5757.56	24735.8	-2.1022	0.0301583	-69.7055	0	0		5921.68	5842.73	5508.27	25027.7	24350.4	24829.4
ENSG00000262769			17	8.59	39.199	-2.10146	0.375392	-5.59805	2.16771e-08	1.25599e-07		9.59	10.16	6.02	38.32	46.09	33.19
ENSG00000258955	LINC00519		14	0	2.322	-2.10144	0.978626	-2.14734	0.0317661	0.0768482		0	0	0	2.02	2.49	2.46
ENSG00000224666	ETV7-AS1		6	0.355	3.483	-2.10089	0.996574	-2.10811	0.0350213	0.0835714		1.07	0	0	3.02	3.74	3.69
ENSG00000175894	TSPEAR	54084	21	0	2.254	-2.09814	0.993818	-2.1112	0.0347555	0.0830416		0	0	0	3.02	3.74	0
ENSG00000205045	SLFN12L	100506736	17	0.355	3.483	-2.09782	0.896484	-2.34006	0.0192809	0.049426		1.07	0	0	3.02	3.74	3.69
ENSG00000256514			11	0.757	5.065	-2.09761	0.912726	-2.29818	0.0215516	0.054502		1.07	0	1.2	4.03	7.47	3.69
ENSG00000237271			2	0.355	4.161	-2.09261	1.03979	-2.01253	0.0441642			1.07	0	0	5.04	4.98	2.46
ENSG00000287181			4	0	2.322	-2.0919	0.902798	-2.31713	0.0204969	0.0521679		0	0	0	2.02	2.49	2.46
ENSG00000102755	FLT1	2321	13	0.355	4.398	-2.09062	1.04018	-2.00987	0.0444452			1.07	0	0	2.02	8.72	2.46
ENSG00000157087	ATP2B2	491	3	1.133	6.478	-2.0875	0.93398	-2.23505	0.0254139	0.0630331		1.07	1.13	1.2	7.06	6.23	6.15
ENSG00000180861	LINC01559		12	10.796	46.819	-2.08454	0.412491	-5.05353	4.33711e-07	2.20489e-06		15.98	6.77	9.63	51.42	39.86	49.17
ENSG00000224846	NQO2-AS1		6	5.99	27.663	-2.08416	0.51314	-4.06158	4.8741e-05	0.00019721		5.33	9.03	3.61	16.13	36.13	30.73
ENSG00000259129	LINC00648	100506433	14	0	3.399	-2.08154	0.799517	-2.60349	0.00922799	0.0255327		0	0	0	4.03	1.25	4.92
ENSG00000088320	REM1	28954	20	0	2.664	-2.08114	1.04041	-2.00031	0.0454665			0	0	0	3.02	3.74	1.23
ENSG00000176928	GCNT4	51301	5	62.771	267.735	-2.08086	0.186946	-11.1308	8.88372e-29	1.61961e-27		69.27	56.44	62.61	255.11	267.83	280.27
ENSG00000236393		101927476	X	3.804	17.411	-2.07757	0.590971	-3.51551	0.000438909	0.00154683		4.26	1.13	6.02	15.12	17.44	19.67
ENSG00000186472	PCLO	27445	7	108.323	475.843	-2.07733	0.354233	-5.86432	4.50984e-09	2.78301e-08		102.3	91.43	131.24	477.95	417.32	532.26
ENSG00000136531	SCN2A	6326	2	0.71	4.828	-2.07443	0.7729	-2.68395	0.00727581	0.0206387		2.13	0	0	7.06	3.74	3.69
ENSG00000129538	RNASE1	6035	14	9.066	39.098	-2.07414	0.345556	-6.00233	1.94512e-09	1.23766e-08		9.59	6.77	10.84	39.32	39.86	38.11
ENSG00000115896	PLCL1	5334	2	0.355	3.74	-2.0733	1.03536	-2.00249	0.0452316			1.07	0	0	5.04	2.49	3.69
ENSG00000232709	MARK2P9		10	0.401	5.401	-2.07325	0.988484	-2.0974	0.0359583			0	0	1.2	5.04	7.47	3.69
ENSG00000178015	GPR150	285601	5	1.133	7.246	-2.07306	0.716451	-2.89351	0.00380962	0.0114284		1.07	1.13	1.2	8.07	11.21	2.46
ENSG00000162366	PDZK1IP1	10158	1	63.468	266.603	-2.0724	0.189493	-10.9366	7.70734e-28	1.3591e-26		54.35	72.24	63.81	260.15	280.29	259.37
ENSG00000170667	RASA4B	100271927	7	2.646	13.469	-2.07213	0.538349	-3.84905	0.000118575	0.000457389		3.2	1.13	3.61	18.15	9.97	12.29
ENSG00000263639	MSMB	4477	10	0.731	5.611	-2.06987	1.03537	-1.99915	0.045592			1.07	1.13	0	2.02	4.98	9.83
ENSG00000249014	HMGN2P4		5	0	2.249	-2.06865	0.964645	-2.14447	0.0319956	0.0773052		0	0	0	3.02	2.49	1.23
ENSG00000166710	B2M	567	15	15266.6	64043	-2.06724	0.0535101	-38.6328	0	0		15272.5	16651.1	13876	65235.6	63429	63464.4
ENSG00000150625	GPM6A	2823	4	1.91	9.057	-2.06461	0.643372	-3.20905	0.00133173	0.00434744		1.07	2.26	2.41	11.09	7.47	8.6
ENSG00000146859	TMEM140	55281	7	313.616	1313.1	-2.06334	0.101737	-20.281	1.89076e-91	1.41853e-89		309.03	329.61	302.2	1260.41	1329.2	1349.7
ENSG00000161905	ALOX15	246	17	1.133	6.63	-2.06207	0.789528	-2.61177	0.00900747	0.0250204		1.07	1.13	1.2	5.04	7.47	7.38
ENSG00000135406	PRPH	5630	12	15.057	64.392	-2.05945	0.34476	-5.97356	2.3213e-09	1.46946e-08		14.92	15.8	14.45	65.54	77.24	50.4
ENSG00000070526	ST6GALNAC1	55808	17	7.461	32.518	-2.05921	0.377	-5.4621	4.70546e-08	2.63868e-07		9.59	6.77	6.02	44.37	24.91	28.27
ENSG00000235568	NFAM1	150372	22	0	2.5	-2.05808	0.99449	-2.06949	0.0385004	0.0908842		0	0	0	5.04	0	2.46
ENSG00000204264	PSMB8	5696	6	1516.45	6315.9	-2.05718	0.0519151	-39.6257	0	0		1463.1	1639.04	1447.2	6366.57	6302.17	6278.95
ENSG00000156049	GNA14	9630	9	0	2.317	-2.05559	0.92065	-2.23276	0.0255647	0.0633819		0	0	0	2.02	1.25	3.69
ENSG00000168685	IL7R	3575	5	9.351	41.372	-2.05529	0.309828	-6.63367	3.27441e-11	2.39068e-10		11.72	7.9	8.43	47.39	38.62	38.11
ENSG00000172818	OVOL1	5017	11	0.401	3.882	-2.05329	0.796976	-2.57636	0.00998477	0.0274243		0	0	1.2	3.02	1.25	7.38
ENSG00000061337	LZTS1	11178	8	2.642	12.54	-2.05134	0.666445	-3.07803	0.00208373	0.00656681		2.13	3.39	2.41	14.12	11.21	12.29
ENSG00000183307	TMEM121B	27439	22	5.639	24.908	-2.05101	0.509688	-4.02405	5.72051e-05	0.000229135		5.33	6.77	4.82	25.21	26.16	23.36
ENSG00000161270	NPHS1	4868	19	28.028	117.206	-2.05098	0.308867	-6.64031	3.13015e-11	2.28941e-10		22.38	31.61	30.1	107.89	118.34	125.38
ENSG00000089169	RPH3A	22895	12	30.269	125.982	-2.05056	0.290589	-7.05654	1.70697e-12	1.36989e-11		24.51	34.99	31.3	149.23	98.41	130.3
ENSG00000137857	DUOX1	53905	15	0	2.317	-2.04816	1.02725	-1.99382	0.0461718	0.10609		0	0	0	2.02	1.25	3.69
ENSG00000108825	PTGES3L-AARSD1	100885850	17	0	2.317	-2.04787	0.938132	-2.18292	0.0290415	0.0709643		0	0	0	2.02	1.25	3.69
ENSG00000261272	MUC22	100507679	6	0.376	3.404	-2.04748	1.0082	-2.03083	0.0422723			0	1.13	0	4.03	2.49	3.69
ENSG00000272941			7	57.078	237.378	-2.04713	0.219307	-9.33455	1.01424e-20	1.33424e-19		62.87	54.18	54.18	236.96	237.94	237.24
ENSG00000270379	HEATR9	256957	17	2.245	10.723	-2.04709	0.833764	-2.45524	0.0140791	0.0373281		3.2	1.13	2.41	11.09	13.7	7.38
ENSG00000166750	SLFN5	162394	17	1306.53	5397.37	-2.04286	0.0801952	-25.4736	3.86514e-143	5.4996e-141		1452.45	1245.08	1222.05	5504.45	5340.46	5347.19
ENSG00000257818	C1GALT1P1		12	0.355	3.404	-2.04176	0.906697	-2.25186	0.0243308	0.060669		1.07	0	0	4.03	2.49	3.69
ENSG00000177494	ZBED2	79413	3	5.334	24.067	-2.04101	0.395835	-5.15622	2.51983e-07	1.31866e-06		4.26	4.52	7.22	25.21	21.18	25.81
ENSG00000235863	B3GALT4	8705	6	18.242	76.557	-2.04087	0.262254	-7.78204	7.13638e-15	6.73846e-14		14.92	16.93	22.88	78.65	79.73	71.3
ENSG00000100968	NFATC4	4776	14	3.352	17.426	-2.03756	0.456212	-4.46625	7.96008e-06	3.53055e-05		4.26	3.39	2.41	26.22	18.69	7.38
ENSG00000245651		283387	12	0.376	3.568	-2.03755	0.971842	-2.09658	0.0360304	0.0856824		0	1.13	0	2.02	6.23	2.46
ENSG00000186038	HTR3E	285242	3	0	6.41	-2.03447	0.789068	-2.57832	0.0099281			0	0	0	8.07	7.47	3.69
ENSG00000043462	LCP2	3937	5	0.757	5.964	-2.03159	1.04	-1.95346	0.0507656			1.07	0	1.2	3.02	8.72	6.15
ENSG00000137033	IL33	90865	9	2.621	11.816	-2.03158	0.622933	-3.26131	0.00110897	0.00366665		3.2	2.26	2.41	13.11	16.19	6.15
ENSG00000154252	GAL3ST2	64090	2	1.868	9.398	-2.02998	0.739038	-2.74679	0.00601821	0.0173638		3.2	0	2.41	12.1	8.72	7.38
ENSG00000256916			11	0.803	5.133	-2.02718	0.922367	-2.19781	0.027963	0.0686404		0	0	2.41	3.02	6.23	6.15
ENSG00000143494	VASH2	79805	1	178.447	729.087	-2.02715	0.108483	-18.6864	6.38875e-78	4.03502e-76		185.42	169.32	180.6	735.07	777.34	674.85
ENSG00000176654	NANOGP1		12	0.401	4.145	-2.02659	1.04029	-1.94809	0.0514043			0	0	1.2	5.04	1.25	6.15
ENSG00000224259	LINC01133		1	1.133	6.153	-2.02613	0.892382	-2.27047	0.0231789	0.0581127		1.07	1.13	1.2	6.05	8.72	3.69
ENSG00000182168	UNC5C	8633	4	1.158	8.158	-2.0261	1.04205	-1.94434	0.0518542	0.117264		1.07	0	2.41	12.1	6.23	6.15
ENSG00000176532	PRR15	222171	7	143.842	586.045	-2.02587	0.141874	-14.2793	2.94335e-46	9.51323e-45		135.33	144.49	151.7	590.88	610.41	556.85
ENSG00000275857			16	2.266	10.792	-2.02558	0.685569	-2.9546	0.00313078	0.00956699		2.13	2.26	2.41	10.08	12.46	9.83
ENSG00000285984			2	0	2.322	-2.02471	1.00547	-2.0137	0.0440409	0.101941		0	0	0	2.02	2.49	2.46
ENSG00000259295	CSPG4P12	440300	15	0	2.39	-2.02267	1.02281	-1.97756	0.0479783	0.10955		0	0	0	1.01	1.25	4.92
ENSG00000170775	GPR37	2861	7	78.477	319.977	-2.02257	0.136844	-14.7802	1.96678e-49	7.01636e-48		76.73	93.69	65.02	359.97	285.27	314.69
ENSG00000049192	ADAMTS6	11174	5	3.779	17.425	-2.02071	0.470972	-4.29051	1.78261e-05	7.59097e-05		4.26	2.26	4.82	20.17	11.21	20.9
ENSG00000138646	HERC5	51191	4	3054.57	12408.3	-2.02016	0.0601721	-33.573	4.15301e-247	1.3529e-244		3126.55	3339.03	2698.15	12417.5	12529.6	12277.6
ENSG00000140274	DUOXA2	405753	15	0	6.325	-2.01955	0.786916	-2.56641	0.0102758			0	0	0	9.07	4.98	4.92
ENSG00000215397	SCRT2	85508	20	0.376	4.664	-2.01264	1.04021	-1.93483	0.0530111	0.119651		0	1.13	0	9.07	0	4.92
ENSG00000140287	HDC	3067	15	3.8	16.439	-2.01175	0.591735	-3.39974	0.000674502	0.00230877		3.2	3.39	4.82	17.14	16.19	15.98
ENSG00000198108	CHSY3	337876	5	7.16	30.383	-2.01126	0.358888	-5.60413	2.09303e-08	1.21413e-07		9.59	2.26	9.63	29.24	33.63	28.27
ENSG00000282793			15	0.401	3.893	-2.01052	1.03968	-1.93378	0.05314			0	0	1.2	3.02	3.74	4.92
ENSG00000165923	AGBL2	79841	11	61.66	250.628	-2.00958	0.164487	-12.2173	2.51325e-34	5.55067e-33		67.13	56.44	61.4	236.96	269.08	245.85
ENSG00000179674	ARL14	80117	3	24.906	102.019	-2.00873	0.237674	-8.45161	2.87304e-17	3.13904e-16		19.18	33.86	21.67	113.94	119.59	72.53
ENSG00000251685	UGT2B27P	101929773	4	0.401	3.41	-2.00847	1.02873	-1.95237	0.0508939			0	0	1.2	4.03	3.74	2.46
ENSG00000287665			7	5.777	24.493	-2.00715	0.528302	-3.79924	0.000145138	0.000553245		2.13	6.77	8.43	25.21	24.91	23.36
ENSG00000166866	MYO1A	4640	12	5.643	24.593	-2.00635	0.528881	-3.79358	0.000148488	0.000565233		6.39	4.52	6.02	18.15	23.67	31.96
ENSG00000228318			21	3.394	15.561	-2.00632	0.857539	-2.33963	0.0193029	0.0494619		2.13	5.64	2.41	12.1	12.46	22.13
ENSG00000250011	HMGB1P3		2	0.401	3.814	-2.00601	1.03041	-1.94682	0.0515567			0	0	1.2	4.03	2.49	4.92
ENSG00000123609	NMI	9111	2	1323.71	5327.05	-2.00582	0.0668807	-29.991	1.28403e-197	2.81327e-195		1339.49	1450.52	1181.12	5159.6	5334.23	5487.32
ENSG00000267076	CCDC58P3		18	0	2.249	-2.00577	1.02413	-1.95851	0.05017			0	0	0	3.02	2.49	1.23
ENSG00000230438	SERPINB9P1		6	12.444	51.443	-2.00497	0.33193	-6.04034	1.53789e-09	9.89732e-09		13.85	9.03	14.45	61.51	47.34	45.48
ENSG00000197272	IL27	246778	16	1.154	23.484	-2.00477	0.895544	-2.2386	0.0251819	0.0625456		0	2.26	1.2	22.18	24.91	23.36
ENSG00000177340		79857	12	0.355	3.904	-2.00445	0.834521	-2.40191	0.0163096	0.0426187		1.07	0	0	3.02	6.23	2.46
ENSG00000168646	AXIN2	8313	17	162.407	654.1	-2.00439	0.146139	-13.7157	8.17889e-43	2.38227e-41		169.43	145.62	172.17	725.99	626.6	609.7
ENSG00000185739	SRL	6345	16	0	2.254	-2.00305	1.03155	-1.94179	0.0521628			0	0	0	3.02	3.74	0
ENSG00000135127	BICDL1	92558	12	226.673	909.881	-2.00251	0.098042	-20.425	1.00314e-92	7.71296e-91		229.11	225.76	225.15	947.83	884.47	897.34
ENSG00000204577				0.401	3.415	-2.00232	1.01344	-1.97577	0.0481805	0.1099		0	0	1.2	4.03	4.98	1.23
ENSG00000004139	SARM1	23098	17	368.363	1477.22	-2.00195	0.0812606	-24.6362	5.17633e-134	6.78072e-132		359.12	369.12	376.85	1493.33	1427.61	1510.73
ENSG00000223923	TNS1-AS1	105373878	2	1.129	7.817	-2.00101	1.02997	-1.94279	0.0520412	0.117633		0	3.39	0	11.09	4.98	7.38
ENSG00000074660	SCARF1	8578	17	6.019	26.348	-2.00043	0.466997	-4.28362	1.83878e-05	7.82209e-05		6.39	5.64	6.02	28.23	31.14	19.67
ENSG00000172935	MRGPRF	116535	11	2.972	13.78	-1.99977	0.52932	-3.77799	0.000158098	0.000598985		3.2	4.52	1.2	14.12	13.7	13.52
ENSG00000174358	SLC6A19	340024	5	0	4.686	-1.99975	0.893774	-2.23742	0.0252589			0	0	0	9.07	4.98	0
ENSG00000241120	HMGN1P8		3	0	2.311	-1.99951	0.98107	-2.03809	0.0415407	0.0969062		0	0	0	2.02	0	4.92
ENSG00000230417				4.038	18.403	-1.99759	0.802692	-2.48862	0.0128241	0.0343725		6.39	4.52	1.2	18.15	13.7	23.36
ENSG00000243978	RTL9	57529	X	2.241	10.912	-1.99571	0.671867	-2.97039	0.00297423	0.00912467		2.13	3.39	1.2	14.12	13.7	4.92
ENSG00000046774	MAGEC2	51438	X	0.376	4.308	-1.99523	0.75456	-2.64422	0.00818782	0.0229756		0	1.13	0	3.02	4.98	4.92
ENSG00000178965	ERICH3	127254	1	0	1.907	-1.99499	0.961143	-2.07564	0.0379269	0.0896929		0	0	0	2.02	1.25	2.46
ENSG00000237626			9	0	2.243	-1.99397	1.03201	-1.93212	0.0533444			0	0	0	3.02	1.25	2.46
ENSG00000116544	DLGAP3	58512	1	7.934	33.369	-1.99276	0.436587	-4.5644	5.00922e-06	2.27431e-05		8.53	5.64	9.63	28.23	43.6	28.27
ENSG00000177238	TRIM72	493829	16	0.71	4.639	-1.9925	0.908681	-2.19274	0.0283263	0.0694152		2.13	0	0	4.03	3.74	6.15
ENSG00000221963	APOL6	80830	22	2990.3	11913.1	-1.9917	0.0723238	-27.5386	6.05462e-167	1.06312e-164		3039.17	3114.39	2817.35	11552.4	11718.6	12468.2
ENSG00000253981	ALG1L13P		8	0.731	4.718	-1.99149	0.817712	-2.43544	0.0148737	0.0392458		1.07	1.13	0	3.02	4.98	6.15
ENSG00000224789			2	0	3.961	-1.99097	1.00719	-1.97675	0.0480698			0	0	0	2.02	2.49	7.38
ENSG00000169174	PCSK9	255738	1	554.882	2203.61	-1.99078	0.0775365	-25.6754	2.20026e-145	3.20435e-143		543.47	520.38	600.79	2352.42	2160.1	2098.31
ENSG00000267733			18	2.997	13.286	-1.98927	0.731293	-2.72021	0.00652395	0.0186923		3.2	3.39	2.41	15.12	11.21	13.52
ENSG00000228412	LNC-LBCS	100506885	6	20.615	84.275	-1.98861	0.291752	-6.81609	9.35532e-12	7.14432e-11		25.58	15.8	20.47	85.71	88.45	78.67
ENSG00000182326	C1S	716	12	5310.11	21052.3	-1.98657	0.0408873	-48.5865	0	0		5383.54	5353.96	5192.83	21920	20300.5	20936.4
ENSG00000186714	CCDC73	493860	11	0.731	4.89	-1.98562	0.878997	-2.25897	0.0238854	0.0596907		1.07	1.13	0	6.05	1.25	7.38
ENSG00000156959	LHFPL4	375323	3	19.123	77.063	-1.98527	0.248683	-7.98314	1.42653e-15	1.39597e-14		22.38	16.93	18.06	77.64	84.71	68.84
ENSG00000241635	UGT1A1	54658	2	26.683	105.855	-1.98503	0.317099	-6.25997	3.8506e-10	2.59269e-09		18.12	28.22	33.71	104.87	95.92	116.78
ENSG00000184788	SATL1	340562	X	0	2.989	-1.98484	1.03432	-1.91898	0.0549863			0	0	0	4.03	1.25	3.69
ENSG00000176840	MIR7-3HG	284424	19	0	2.737	-1.98445	1.04121	-1.90591	0.0566619			0	0	0	2.02	3.74	2.46
ENSG00000171236	LRG1	116844	19	6.768	28.673	-1.9842	0.368406	-5.3859	7.20835e-08	3.96059e-07		5.33	10.16	4.82	35.29	24.91	25.81
ENSG00000215869		100129138	1	0	2.8	-1.9811	1.04096	-1.90316	0.05702			0	0	0	1.01	1.25	6.15
ENSG00000246731		85001	17	2.621	12.379	-1.98103	0.70521	-2.80913	0.00496751	0.0145787		3.2	2.26	2.41	11.09	17.44	8.6
ENSG00000152595	MEPE	56955	4	0.731	4.565	-1.98052	0.982879	-2.01502	0.0439028	0.10165		1.07	1.13	0	5.04	3.74	4.92
ENSG00000231870	KRT17P3		17	0	1.981	-1.98038	0.990203	-1.99998	0.0455028	0.10483		0	0	0	1.01	1.25	3.69
ENSG00000011422	PLAUR	5329	19	2385.35	9416.19	-1.97905	0.0611492	-32.3643	8.72638e-230	2.4715e-227		2329.46	2552.24	2274.34	9216.1	9759.08	9273.38
ENSG00000250799	PRODH2	58510	19	3.775	15.698	-1.97862	0.627268	-3.15435	0.00160857	0.00517813		3.2	4.52	3.61	16.13	17.44	13.52
ENSG00000079308	TNS1	7145	2	260.849	1028.12	-1.97752	0.0992876	-19.9171	2.89263e-88	2.10635e-86		238.7	276.56	267.29	979.08	989.11	1116.15
ENSG00000086967	MYBPC2	4606	19	0.376	3.325	-1.97703	1.02686	-1.92533	0.0541885			0	1.13	0	5.04	1.25	3.69
ENSG00000122643	NT5C3A	51251	7	2564.06	10100.8	-1.9755	0.0730129	-27.0568	3.17655e-161	5.31385e-159		2704.56	2520.64	2466.98	10213.3	9999.51	10089.6
ENSG00000016402	IL20RA	53832	6	2.575	11.868	-1.97549	0.553719	-3.56767	0.000360174	0.0012875		4.26	2.26	1.2	12.1	11.21	12.29
ENSG00000161955	TNFSF13	8741	17	18.599	74.387	-1.97483	0.315575	-6.25788	3.90241e-10	2.62615e-09		9.59	29.35	16.86	68.57	71.01	83.59
ENSG00000249790			12	2.934	14.19	-1.97276	0.493109	-4.00066	6.31656e-05	0.000251828		6.39	0	2.41	14.12	13.7	14.75
ENSG00000174837	ADGRE1	2015	19	490.692	1927.75	-1.97273	0.0857565	-23.0038	4.26873e-117	4.59501e-115		490.19	514.74	467.15	1911.79	1900.99	1970.47
ENSG00000168658	VWA3B	200403	2	0	1.992	-1.97259	0.979071	-2.01476	0.0439297	0.101693		0	0	0	1.01	3.74	1.23
ENSG00000283265			6	0.778	6	-1.97243	1.03932	-1.89781	0.0577216			0	1.13	1.2	8.07	7.47	2.46
ENSG00000260572			3	0.753	5.248	-1.97211	0.736835	-2.67645	0.00744056	0.0210674		0	2.26	0	7.06	6.23	2.46
ENSG00000224655	LINC01823	101927801	2	0.376	3.404	-1.97102	1.01033	-1.95087	0.0510722	0.115728		0	1.13	0	4.03	2.49	3.69
ENSG00000091513	TF	7018	3	19.676	81.019	-1.96858	0.436576	-4.50913	6.50936e-06	2.91111e-05		15.98	22.58	20.47	106.88	72.25	63.92
ENSG00000238290			1	0.376	4.008	-1.96835	0.786611	-2.50232	0.0123383	0.0331934		0	1.13	0	7.06	3.74	1.23
ENSG00000174059	CD34	947	1	3.825	16.365	-1.96824	0.716401	-2.7474	0.0060069	0.0173393		3.2	2.26	6.02	18.15	16.19	14.75
ENSG00000236654			7	0.376	3.472	-1.96791	1.00688	-1.95446	0.050647	0.11487		0	1.13	0	3.02	1.25	6.15
ENSG00000231013	SCTR-AS1	107105282	2	0	2.585	-1.96745	1.0406	-1.89069	0.0586663	0.130711		0	0	0	4.03	2.49	1.23
ENSG00000268902	CSAG2	102723547	X	0	3	-1.96703	0.813692	-2.41741	0.0156314	0.0410133		0	0	0	4.03	3.74	1.23
ENSG00000234362	LINC01914		2	82.678	324.512	-1.96545	0.193667	-10.1486	3.36086e-24	5.15933e-23		79.92	97.08	71.04	311.57	326.38	335.58
ENSG00000169194	IL13	3596	5	0	2.249	-1.96331	1.03996	-1.88787	0.0590438			0	0	0	3.02	2.49	1.23
ENSG00000226472			12	1.534	8.076	-1.96328	0.687987	-2.85366	0.00432188	0.0128345		1.07	1.13	2.41	8.07	13.7	2.46
ENSG00000205413	SAMD9	54809	7	4004.38	15645.4	-1.96279	0.0846911	-23.1758	7.97971e-119	8.74167e-117		4313.65	3959.87	3739.6	15306.4	15712.4	15917.4
ENSG00000235419			2	0	2.065	-1.9625	0.931524	-2.10676	0.0351385	0.0838273		0	0	0	0	3.74	2.46
ENSG00000254721			11	1.555	8.144	-1.96146	0.895295	-2.19085	0.0284626	0.0696734		0	2.26	2.41	7.06	12.46	4.92
ENSG00000172123	SLFN12	55106	17	4.89	21.184	-1.96076	0.42244	-4.64152	3.45863e-06	1.59964e-05		6.39	2.26	6.02	20.17	27.41	15.98
ENSG00000156804	FBXO32	114907	8	267.297	1042.31	-1.96076	0.0885654	-22.1392	1.3268e-108	1.27321e-106		258.95	290.1	252.84	1074.88	1056.38	995.68
ENSG00000139364	TMEM132B	114795	12	2.663	11.636	-1.96071	0.786239	-2.49378	0.0126391	0.0339061		1.07	4.52	2.41	15.12	8.72	11.06
ENSG00000177669	MBOAT4	619373	8	5.338	22.04	-1.96056	0.566809	-3.45894	0.000542304	0.00188594		5.33	2.26	8.43	25.21	26.16	14.75
ENSG00000124302	CHST8	64377	19	0	2.322	-1.96027	1.03845	-1.8877	0.0590666			0	0	0	2.02	2.49	2.46
ENSG00000251301	LINC02384		12	0	3.972	-1.95918	0.887738	-2.20694	0.0273185			0	0	0	2.02	4.98	4.92
ENSG00000183092	BEGAIN	57596	14	97.425	380.716	-1.95817	0.140522	-13.935	3.88439e-44	1.17567e-42		99.1	100.46	92.71	366.02	407.36	368.77
ENSG00000287454			12	0	2.317	-1.958	1.03351	-1.89452	0.0581563			0	0	0	2.02	1.25	3.69
ENSG00000178033	CALHM5	254228	6	19.216	75.462	-1.95745	0.248125	-7.88895	3.04734e-15	2.9345e-14		20.25	16.93	20.47	81.67	67.27	77.44
ENSG00000114115	RBP1	5947	3	13.97	55.531	-1.95712	0.297931	-6.56902	5.06472e-11	3.63772e-10		12.79	14.67	14.45	56.47	54.81	55.32
ENSG00000177989	ODF3B	440836	22	584.164	2277.43	-1.95707	0.12902	-15.1687	5.69542e-52	2.13647e-50		512.57	635.52	604.4	2407.88	2442.88	1981.53
ENSG00000178429	RPS3AP5		10	9.535	42.792	-1.95704	0.655239	-2.98676	0.00281949	0.00868869		7.46	7.9	13.24	9.07	4.98	114.32
ENSG00000086205	FOLH1	2346	11	1.179	5.795	-1.95691	0.773114	-2.53121	0.0113671	0.030848		0	1.13	2.41	5.04	3.74	8.6
ENSG00000163687	DNASE1L3	1776	3	0.376	3.573	-1.95561	1.03747	-1.88498	0.0594327			0	1.13	0	2.02	7.47	1.23
ENSG00000160185	UBASH3A	53347	21	1.087	6.032	-1.95559	0.924325	-2.1157	0.0343706	0.0822172		2.13	1.13	0	2.02	7.47	8.6
ENSG00000172201	ID4	3400	6	386.444	1502.48	-1.95511	0.100981	-19.3612	1.64145e-83	1.13201e-81		417.73	380.41	361.2	1598.2	1457.51	1451.73
ENSG00000165511	ZNF22-AS1	220979	10	0.376	4.235	-1.95469	0.756228	-2.58478	0.00974398	0.0268344		0	1.13	0	4.03	4.98	3.69
ENSG00000129226	CD68	968	17	17.503	69.202	-1.95468	0.342382	-5.70908	1.1359e-08	6.75053e-08		11.72	20.32	20.47	66.55	69.76	71.3
ENSG00000125347	IRF1	3659	5	2009.51	7788.27	-1.95263	0.0518337	-37.671	0	0		2008.71	2210.21	1809.6	7785.28	7809.51	7770.02
ENSG00000268041	ERFL	390937	19	7.574	30.967	-1.95248	0.465712	-4.19246	2.75951e-05	0.000115075		6.39	7.9	8.43	27.22	39.86	25.81
ENSG00000264672	SEPTIN4-AS1	101927688	17	0	2.401	-1.95061	0.91573	-2.13011	0.0331623	0.0797427		0	0	0	1.01	3.74	2.46
ENSG00000277450			17	0	2.243	-1.94821	1.02905	-1.89322	0.058329	0.130077		0	0	0	3.02	1.25	2.46
ENSG00000278949			12	1.513	8.106	-1.94723	0.721531	-2.69875	0.00695996	0.0198314		2.13	0	2.41	7.06	3.74	13.52
ENSG00000214691	LINC01913	388942	2	10.233	40.715	-1.94563	0.453088	-4.29414	1.75368e-05	7.47163e-05		6.39	14.67	9.63	39.32	34.88	47.94
ENSG00000135148	TRAFD1	10906	12	1857.74	7157.59	-1.94526	0.0424424	-45.833	0	0		1840.34	1926.88	1805.99	7300.28	7008.5	7164.01
ENSG00000274949			20	0.757	4.571	-1.94473	0.94956	-2.04803	0.0405569	0.0950221		1.07	0	1.2	5.04	4.98	3.69
ENSG00000175463	TBC1D10C	374403	11	0.376	3.142	-1.94352	0.984565	-1.97399	0.0483827	0.1103		0	1.13	0	2.02	2.49	4.92
ENSG00000126262	FFAR2	2867	19	0.757	6.33	-1.94327	1.00194	-1.93951	0.0524389			1.07	0	1.2	9.07	6.23	3.69
ENSG00000222017			2	1.463	7.876	-1.94295	0.967318	-2.0086	0.0445798	0.102977		2.13	2.26	0	5.04	11.21	7.38
ENSG00000149403	GRIK4	2900	11	1.509	7.303	-1.94204	0.815547	-2.38127	0.0172529	0.044765		1.07	2.26	1.2	7.06	7.47	7.38
ENSG00000201579	RNU6-343P		12	0.71	4.724	-1.94019	0.911118	-2.12946	0.0332166	0.0798579		2.13	0	0	3.02	6.23	4.92
ENSG00000246375	PPM1K-DT	105369192	4	1.112	5.737	-1.94007	0.810398	-2.39397	0.0166673	0.0434367		2.13	0	1.2	6.05	7.47	3.69
ENSG00000078018	MAP2	4133	2	128.549	496.482	-1.93961	0.138889	-13.9652	2.54214e-44	7.75101e-43		137.47	124.17	124.01	502.15	480.85	506.45
ENSG00000266714	MYO15B	80022	17	993.151	3811.28	-1.93793	0.0879454	-22.0356	1.3138e-107	1.24149e-105		942.01	953.85	1083.59	3838.7	3875.48	3719.68
ENSG00000166147	FBN1	2200	15	602.589	2324.94	-1.93562	0.164727	-11.7505	7.02103e-32	1.44016e-30		648.97	515.87	642.93	2251.59	2172.56	2550.67
ENSG00000177335	C8orf31	286122	8	0	2.574	-1.93523	0.847564	-2.28329	0.0224132	0.0564446		0	0	0	4.03	0	3.69
ENSG00000257890			12	0	2.469	-1.9347	1.03681	-1.866	0.0620409	0.136985		0	0	0	0	2.49	4.92
ENSG00000255326		105369391	11	1.509	7.396	-1.93445	0.760228	-2.54457	0.0109413	0.029761		1.07	2.26	1.2	11.09	2.49	8.6
ENSG00000135248	FAM71F1	84691	7	0.778	4.576	-1.93307	0.822611	-2.34992	0.0187773	0.0482709		0	1.13	1.2	5.04	6.23	2.46
ENSG00000007402	CACNA2D2	9254	3	22.936	89.113	-1.93203	0.314722	-6.13883	8.3134e-10	5.44074e-09		22.38	25.96	20.47	86.72	87.2	93.42
ENSG00000047457	CP	1356	3	465.657	1779.92	-1.93104	0.124016	-15.5709	1.14815e-54	4.61461e-53		483.79	371.38	541.8	2039.84	1534.74	1765.19
ENSG00000261183	SPINT1-AS1		15	0.71	5.385	-1.92816	0.696881	-2.76684	0.00566027	0.0164345		2.13	0	0	5.04	3.74	7.38
ENSG00000234465	PINLYP	390940	19	3.018	13.371	-1.92749	0.571516	-3.37259	0.000744645	0.00253102		2.13	4.52	2.41	14.12	13.7	12.29
ENSG00000170925	TEX13B	56156	X	0	2.585	-1.92736	1.0405	-1.85234	0.0639771			0	0	0	4.03	2.49	1.23
ENSG00000265243	IGLJCOR18		18	5.685	22.413	-1.92725	0.595857	-3.23442	0.0012189	0.00400445		4.26	6.77	6.02	20.17	27.41	19.67
ENSG00000125813	PAX1	5075	20	0.355	3.972	-1.92693	1.0388	-1.85495	0.0636034			1.07	0	0	2.02	4.98	4.92
ENSG00000059915	PSD	5662	10	14.233	56.389	-1.92628	0.32823	-5.86867	4.39301e-09	2.7143e-08		15.98	14.67	12.04	50.42	56.06	62.69
ENSG00000166035	LIPC	3990	15	1.935	8.8	-1.92314	0.805351	-2.38796	0.0169422	0.0440572		1.07	1.13	3.61	9.07	8.72	8.6
ENSG00000227619			9	74.128	282.171	-1.92234	0.171868	-11.1849	4.8328e-29	8.88934e-28		80.99	64.34	77.06	288.38	282.78	275.35
ENSG00000089250	NOS1	4842	12	55.323	210.081	-1.92223	0.224511	-8.56184	1.11083e-17	1.23994e-16		56.48	55.31	54.18	220.82	191.84	217.58
ENSG00000204267	TAP2	6891	6	1102.51	4179.91	-1.92073	0.0538086	-35.6955	4.63631e-279	1.94552e-276		1106.12	1167.19	1034.23	4151.28	4188.16	4200.31
ENSG00000204889	KRT40	125115	17	0	1.901	-1.91895	1.00055	-1.91789	0.0551248	0.123891		0	0	0	2.02	0	3.69
ENSG00000234709	UPF3AP3		9	2.617	11.521	-1.91772	0.733647	-2.61396	0.00895002	0.0248692		2.13	4.52	1.2	11.09	8.72	14.75
ENSG00000271581			6	1.488	6.918	-1.91756	0.818365	-2.34316	0.0191214	0.049068		2.13	1.13	1.2	12.1	3.74	4.92
ENSG00000173093	CCDC63	160762	12	0.401	3.153	-1.91745	0.984097	-1.94844	0.0513627	0.116269		0	0	1.2	2.02	4.98	2.46
ENSG00000116254	CHD5	26038	1	35.297	135.023	-1.9163	0.188556	-10.163	2.89944e-24	4.46698e-23		34.1	42.89	28.9	139.15	123.33	142.59
ENSG00000149633	KIAA1755	85449	20	8.962	35.577	-1.91616	0.40399	-4.74308	2.1049e-06	9.94589e-06		8.53	13.55	4.82	42.35	34.88	29.5
ENSG00000256625			12	0	2.732	-1.91542	0.845148	-2.26638	0.0234283	0.0586609		0	0	0	2.02	2.49	3.69
ENSG00000080644	CHRNA3	1136	15	9.731	37.948	-1.91278	0.482419	-3.96499	7.34005e-05	0.000290064		12.79	6.77	9.63	38.32	41.11	34.42
ENSG00000227300	KRT16P2		17	0.376	3.967	-1.91181	0.774989	-2.46688	0.0136296	0.0362918		0	1.13	0	2.02	3.74	6.15
ENSG00000163554	SPTA1	6708	1	4.155	16.597	-1.91178	0.644285	-2.96728	0.00300446	0.0092094		4.26	3.39	4.82	15.12	18.69	15.98
ENSG00000261804			16	0	1.992	-1.91051	0.921878	-2.07241	0.038227	0.0903077		0	0	0	1.01	3.74	1.23
ENSG00000284969			11	5.568	22.676	-1.91038	0.529769	-3.60607	0.000310872	0.00112178		6.39	7.9	2.41	22.18	27.41	18.44
ENSG00000135898	GPR55	9290	2	0	2.054	-1.91038	0.963635	-1.98247	0.0474264	0.1085		0	0	0	0	1.25	4.92
ENSG00000168993	CPLX1	10815	4	20.37	78.75	-1.9103	0.238912	-7.99583	1.28706e-15	1.26649e-14		20.25	19.19	21.67	71.59	88.45	76.21
ENSG00000215478	CES5AP1		22	5.196	20.452	-1.90927	0.568387	-3.35911	0.000781953	0.0026462		7.46	4.52	3.61	24.2	21.18	15.98
ENSG00000143341	HMCN1	83872	1	0	2.249	-1.90916	0.894192	-2.13507	0.0327556	0.0789017		0	0	0	3.02	2.49	1.23
ENSG00000260011			17	0.778	4.655	-1.90892	0.872248	-2.1885	0.0286331	0.070063		0	1.13	1.2	4.03	7.47	2.46
ENSG00000286540			6	1.864	8.557	-1.90882	0.807468	-2.36396	0.0180808	0.0466978		2.13	2.26	1.2	12.1	3.74	9.83
ENSG00000226789	WBP11P2		2	0	2.096	-1.90799	1.03144	-1.84982	0.0643392	0.141215		0	0	0	5.04	1.25	0
ENSG00000153404	PLEKHG4B	153478	5	59.604	226.291	-1.9068	0.146551	-13.0112	1.05649e-38	2.70212e-37		60.74	71.12	46.96	214.77	236.69	227.41
ENSG00000256043	CTSO	1519	4	75.287	283.64	-1.90672	0.154342	-12.3539	4.63958e-35	1.04901e-33		75.66	76.76	73.44	290.4	277.8	282.73
ENSG00000197471	SPN	6693	16	1.534	7.455	-1.90664	0.906373	-2.10359	0.0354141	0.0844279		1.07	1.13	2.41	5.04	8.72	8.6
ENSG00000132554	RGS22	26166	8	26.661	101.677	-1.90536	0.371562	-5.12798	2.9287e-07	1.51978e-06		25.58	32.74	21.67	116.97	92.18	95.88
ENSG00000213754	KPNA4P1		X	0.355	3.074	-1.90497	1.01374	-1.87915	0.060224	0.133545		1.07	0	0	3.02	3.74	2.46
ENSG00000260325	HSPB9	94086	17	0.376	3.153	-1.90408	0.938448	-2.02897	0.0424616	0.0987752		0	1.13	0	2.02	4.98	2.46
ENSG00000074276	CDHR2	54825	5	1.555	7.444	-1.90375	0.806097	-2.36169	0.0181917	0.0469499		0	2.26	2.41	5.04	6.23	11.06
ENSG00000151470	C4orf33	132321	4	227.778	857.326	-1.90345	0.121315	-15.6902	1.76508e-55	7.23508e-54		255.75	232.54	195.05	852.04	853.33	866.61
ENSG00000101230	ISM1	140862	20	7.135	28.307	-1.90159	0.487753	-3.89867	9.67232e-05	0.000376699		9.59	3.39	8.43	29.24	27.41	28.27
ENSG00000169071	ROR2	4920	9	18.773	72.1	-1.90152	0.235783	-8.06472	7.3406e-16	7.37276e-15		15.98	27.09	13.24	61.51	85.96	68.84
ENSG00000185745	IFIT1	3434	10	25419.8	94900.3	-1.89838	0.0689524	-27.5318	7.31754e-167	1.27583e-164		26435	27899.7	21924.7	95126.4	93752.7	95821.6
ENSG00000260328			17	46.827	175.323	-1.89749	0.183475	-10.342	4.55145e-25	7.21875e-24		31.97	51.93	56.59	174.44	183.12	168.41
ENSG00000078725	BRINP1	1620	9	4.498	18.283	-1.89736	0.605393	-3.1341	0.00172381	0.00551683		2.13	10.16	1.2	20.17	19.93	14.75
ENSG00000185834	RPL12P4		20	3.712	16.291	-1.8965	0.632032	-3.00063	0.00269419	0.0083389		6.39	1.13	3.61	9.07	34.88	4.92
ENSG00000249700	SRD5A3-AS1	100506462	4	3.089	12.704	-1.89614	0.630791	-3.00597	0.00264739	0.00820428		1.07	3.39	4.82	12.1	14.95	11.06
ENSG00000143502	SUSD4	55061	1	11.269	43.011	-1.89563	0.32105	-5.90446	3.53801e-09	2.2003e-08		14.92	5.64	13.24	47.39	38.62	43.02
ENSG00000237379	CBX1P3		1	0.731	4.492	-1.89477	1.025	-1.84857	0.0645204			1.07	1.13	0	6.05	3.74	3.69
ENSG00000286472			20	3.594	15.155	-1.89477	0.567712	-3.33755	0.000845207	0.00284354		8.53	2.26	0	23.19	11.21	11.06
ENSG00000249363			5	0	1.912	-1.89405	1.01121	-1.87305	0.0610618	0.13517		0	0	0	2.02	2.49	1.23
ENSG00000134627	PIWIL4	143689	11	7.127	27.848	-1.89329	0.455653	-4.15512	3.25116e-05	0.000134221		7.46	7.9	6.02	35.29	23.67	24.58
ENSG00000226622			2	0.401	2.994	-1.89169	0.999665	-1.89233	0.0584474	0.130294		0	0	1.2	4.03	2.49	2.46
ENSG00000236366		153910	6	0	1.997	-1.89137	0.986616	-1.91703	0.0552343	0.124058		0	0	0	1.01	4.98	0
ENSG00000187475	H1-6	3010	6	0	1.833	-1.89132	1.00769	-1.87689	0.0605333			0	0	0	3.02	1.25	1.23
ENSG00000160801	PTH1R	5745	3	7.152	28.343	-1.89054	0.384456	-4.91744	8.76814e-07	4.31145e-06		7.46	6.77	7.22	34.28	26.16	24.58
ENSG00000253477			8	0	1.997	-1.88998	1.01365	-1.86453	0.0622476	0.13738		0	0	0	1.01	4.98	0
ENSG00000260211			15	0.376	3.153	-1.88838	1.02317	-1.84562	0.0649475			0	1.13	0	2.02	4.98	2.46
ENSG00000226453	LINC02542		6	0.355	3.746	-1.88833	0.780214	-2.42027	0.015509	0.040731		1.07	0	0	5.04	3.74	2.46
ENSG00000207563	MIR23B	407011	9	0.401	3.147	-1.88769	1.01188	-1.86552	0.0621091			0	0	1.2	2.02	3.74	3.69
ENSG00000227113			7	0	2.071	-1.88737	1.00766	-1.87302	0.061066	0.13517		0	0	0	0	4.98	1.23
ENSG00000287070			9	0	1.907	-1.88707	1.02069	-1.84882	0.064484			0	0	0	2.02	1.25	2.46
ENSG00000149418	ST14	6768	11	8.941	36.025	-1.88686	0.313145	-6.02552	1.68563e-09	1.08032e-08		9.59	12.42	4.82	36.3	36.13	35.65
ENSG00000157601	MX1	4599	21	19288.1	71379.2	-1.88615	0.061604	-30.6173	7.19733e-206	1.71338e-203		19161	20972.2	17731.2	69153	71922.5	73062.3
ENSG00000108622	ICAM2	3384	17	3.725	15.572	-1.88549	0.479461	-3.93252	8.40617e-05	0.000329978		3.2	6.77	1.2	12.1	14.95	19.67
ENSG00000130643	CALY	50632	10	2.663	11.426	-1.88477	0.634331	-2.97128	0.00296564	0.00910364		1.07	4.52	2.41	18.15	11.21	4.92
ENSG00000164692	COL1A2	1278	7	0.355	2.921	-1.88449	0.958108	-1.96688	0.0491966	0.11197		1.07	0	0	5.04	2.49	1.23
ENSG00000135063	FAM189A2	9413	9	2.692	11.147	-1.88378	0.542313	-3.47361	0.000513503	0.00179263		2.13	1.13	4.82	16.13	7.47	9.83
ENSG00000165606	DRGX	644168	10	0	1.997	-1.88151	1.01133	-1.86042	0.0628258	0.138385		0	0	0	1.01	4.98	0
ENSG00000253665	LINC02866		8	0.401	3.489	-1.87949	1.04084	-1.80575	0.070958			0	0	1.2	3.02	4.98	2.46
ENSG00000154856	APCDD1	147495	18	0	1.907	-1.87801	0.949035	-1.97886	0.0478316	0.109275		0	0	0	2.02	1.25	2.46
ENSG00000161133	USP41	373856	22	2.684	11.453	-1.87792	0.852073	-2.20394	0.0275285	0.0677148		0	5.64	2.41	12.1	9.97	12.29
ENSG00000135346	CGA	1081	6	0	1.981	-1.87725	0.925929	-2.02742	0.0426192	0.099058		0	0	0	1.01	1.25	3.69
ENSG00000269729			19	23.842	89.33	-1.87665	0.282866	-6.63441	3.25796e-11	2.37937e-10		29.84	24.83	16.86	89.74	93.43	84.82
ENSG00000262583	TMEM231P1		16	0.376	3.331	-1.87633	0.868767	-2.15977	0.0307908	0.0747331		0	1.13	0	5.04	2.49	2.46
ENSG00000101336	HCK	3055	20	0.376	2.915	-1.87625	1.00472	-1.86744	0.0618408	0.136653		0	1.13	0	5.04	1.25	2.46
ENSG00000134986	NREP	9315	5	250.196	919.203	-1.87446	0.0863463	-21.7086	1.70091e-104	1.52025e-102		267.47	230.28	252.84	961.94	909.39	886.28
ENSG00000117122	MFAP2	4237	1	3.026	13.922	-1.87359	0.478931	-3.91202	9.15266e-05	0.000357754		4.26	0	4.82	12.1	12.46	17.21
ENSG00000077264	PAK3	5063	X	11.357	42.524	-1.87314	0.482027	-3.88597	0.000101924	0.000395771		11.72	7.9	14.45	43.36	47.34	36.88
ENSG00000257194			12	0.731	4.297	-1.87309	0.937613	-1.99772	0.0457474	0.10531		1.07	1.13	0	3.02	2.49	7.38
ENSG00000247809	NR2F2-AS1		15	4.422	18.346	-1.87295	0.507359	-3.69157	0.00022287	0.000822941		8.53	1.13	3.61	19.16	17.44	18.44
ENSG00000286782			9	0.401	3.467	-1.87267	1.00079	-1.8712	0.0613172	0.135653		0	0	1.2	3.02	0	7.38
ENSG00000224961	LINC01752		20	0.401	3.068	-1.87232	0.916512	-2.04288	0.0410642	0.0959483		0	0	1.2	3.02	2.49	3.69
ENSG00000124205	EDN3	1908	20	1.112	5.743	-1.87207	0.981768	-1.90683	0.0565423	0.126582		2.13	0	1.2	6.05	8.72	2.46
ENSG00000227495	KIF1C-AS1	102724009	17	1.885	8.464	-1.8719	0.713107	-2.625	0.00866497	0.0241422		1.07	3.39	1.2	8.07	8.72	8.6
ENSG00000105549	THEG	51298	19	0.71	4.156	-1.87153	0.886587	-2.11094	0.0347778	0.0830787		2.13	0	0	5.04	3.74	3.69
ENSG00000121594	CD80	941	3	0.401	3.331	-1.8695	1.03061	-1.81398	0.0696814	0.151215		0	0	1.2	5.04	2.49	2.46
ENSG00000255008	LINC02739		11	1.133	5.842	-1.86905	0.800897	-2.33369	0.0196117	0.0501858		1.07	1.13	1.2	10.08	4.98	2.46
ENSG00000243083	LINC00870	201617	3	0	2.407	-1.86813	1.0417	-1.79335	0.0729163			0	0	0	1.01	4.98	1.23
ENSG00000064195	DLX3	1747	17	7.561	29.181	-1.86798	0.413829	-4.51389	6.36497e-06	2.84962e-05		9.59	2.26	10.84	29.24	39.86	18.44
ENSG00000174502	SLC26A9	115019	1	42.026	154.505	-1.86754	0.243917	-7.65648	1.91101e-14	1.75688e-13		49.02	36.12	40.94	191.58	113.36	158.57
ENSG00000224992			9	1.982	8.942	-1.86602	0.673456	-2.77082	0.00559155	0.0162523		0	1.13	4.82	7.06	7.47	12.29
ENSG00000176438	SYNE3	161176	14	26.819	98.617	-1.86544	0.22809	-8.17851	2.87365e-16	2.96441e-15		27.71	21.45	31.3	91.76	95.92	108.17
ENSG00000101017	CD40	958	20	162.501	592.659	-1.86531	0.113552	-16.4269	1.22814e-60	5.71545e-59		160.91	158.03	168.56	633.23	581.76	562.99
ENSG00000187957	DNER	92737	2	57.531	210.708	-1.8647	0.15969	-11.677	1.67123e-31	3.39707e-30		50.08	58.7	63.81	212.76	200.56	218.8
ENSG00000272382			5	1.133	5.317	-1.86466	0.943985	-1.97531	0.0482332	0.10999		1.07	1.13	1.2	6.05	4.98	4.92
ENSG00000197273	GUCA2A	2980	1	0	2.243	-1.86451	1.0421	-1.78919	0.0735835			0	0	0	3.02	1.25	2.46
ENSG00000218018	RBM38-AS1	100291105	20	0	1.907	-1.86438	0.991176	-1.88097	0.0599754	0.133093		0	0	0	2.02	1.25	2.46
ENSG00000224093	BCAR3-AS1		1	0.71	4.376	-1.86427	0.882601	-2.11225	0.0346654	0.0828502		2.13	0	0	2.02	3.74	7.38
ENSG00000287828			1	0	2.317	-1.86273	1.04097	-1.78943	0.0735459			0	0	0	2.02	1.25	3.69
ENSG00000169851	PCDH7	5099	4	21.373	79.253	-1.86268	0.224668	-8.29081	1.12482e-16	1.18655e-15		20.25	28.22	15.65	75.62	83.46	78.67
ENSG00000112297	CRYBG1	202	6	170.452	625.675	-1.86152	0.121804	-15.2829	9.94239e-53	3.80454e-51		200.34	174.97	136.05	595.92	667.71	613.39
ENSG00000167178	ISLR2	57611	15	3.466	14.026	-1.86096	0.763151	-2.43852	0.0147475	0.038975		1.07	4.52	4.82	16.13	9.97	15.98
ENSG00000225963			2	0	1.754	-1.8595	1.00452	-1.85113	0.0641514	0.140856		0	0	0	4.03	0	1.23
ENSG00000182557	SPNS3	201305	17	0.376	2.994	-1.85936	1.01793	-1.82661	0.0677587			0	1.13	0	4.03	2.49	2.46
ENSG00000108375	RNF43	54894	17	70.664	257.3	-1.85869	0.149173	-12.46	1.23432e-35	2.86941e-34		73.53	54.18	84.28	257.12	257.87	256.91
ENSG00000128918	ALDH1A2	8854	15	1.087	5.647	-1.85847	0.764946	-2.42954	0.0151178	0.0398262		2.13	1.13	0	7.06	3.74	6.15
ENSG00000174808	BTC	685	4	219.759	798.075	-1.85807	0.0966444	-19.2258	2.2518e-82	1.5274e-80		224.85	220.12	214.31	776.41	845.85	771.96
ENSG00000135697	BCO1	53630	16	230.884	839.934	-1.858	0.117614	-15.7975	3.23907e-56	1.3569e-54		254.68	239.31	198.66	837.92	857.07	824.82
ENSG00000164287	CDC20B	166979	5	0.778	4.303	-1.85741	0.992264	-1.87189	0.0612222	0.135479		0	1.13	1.2	3.02	3.74	6.15
ENSG00000196358	NTNG2	84628	9	89.565	325.695	-1.85717	0.176001	-10.5521	4.97e-26	8.23058e-25		96.97	79.02	92.71	333.76	311.43	331.89
ENSG00000184502	GAST	2520	17	0	1.907	-1.85677	1.03238	-1.79852	0.0720943			0	0	0	2.02	1.25	2.46
ENSG00000167311	ART5	116969	11	1.087	5.726	-1.85529	0.85916	-2.15943	0.0308171	0.0747791		2.13	1.13	0	6.05	4.98	6.15
ENSG00000235821	IFITM4P		6	0.731	4.497	-1.85489	0.78778	-2.35457	0.0185439	0.0477494		1.07	1.13	0	6.05	4.98	2.46
ENSG00000184613	NELL2	4753	12	2.237	10.349	-1.85479	0.548026	-3.38449	0.00071311	0.00243285		1.07	5.64	0	10.08	4.98	15.98
ENSG00000165591	FAAH2	158584	X	5.221	20.289	-1.85441	0.425531	-4.35788	1.3133e-05	5.66163e-05		7.46	3.39	4.82	26.22	17.44	17.21
ENSG00000163701	IL17RE	132014	3	72.624	264.589	-1.85347	0.182207	-10.1723	2.63544e-24	4.06785e-23		74.59	72.24	71.04	255.11	297.73	240.93
ENSG00000154133	ROBO4	54538	11	0.757	4.156	-1.8533	0.806011	-2.29935	0.0214851	0.0543623		1.07	0	1.2	5.04	3.74	3.69
ENSG00000126709	IFI6	2537	1	20621.1	74659.7	-1.8532	0.084995	-21.8036	2.14252e-105	1.95737e-103		19060.8	23403.7	19398.8	75057.7	76894.2	72027.3
ENSG00000155760	FZD7	8324	2	542.415	1957.28	-1.8525	0.0595218	-31.1231	1.17315e-212	2.93383e-210		516.83	537.31	573.1	1987.41	1952.07	1932.36
ENSG00000137460	FHDC1	85462	4	36.4	134.199	-1.85235	0.179888	-10.2972	7.2518e-25	1.13921e-23		40.49	34.99	33.71	128.06	124.57	149.97
ENSG00000257512			12	6.658	26.343	-1.85125	0.381804	-4.8487	1.24273e-06	6.01118e-06		9.59	6.77	3.61	28.23	29.9	20.9
ENSG00000113532	ST8SIA4	7903	5	559.072	2019.98	-1.85116	0.0881314	-21.0045	5.96419e-98	4.80982e-96		629.79	506.84	540.59	2088.24	1950.82	2020.87
ENSG00000259342			15	0.778	4.076	-1.8495	0.986698	-1.87443	0.060871	0.134846		0	1.13	1.2	6.05	2.49	3.69
ENSG00000260997			7	0.376	2.994	-1.84946	1.03185	-1.79237	0.0730742			0	1.13	0	4.03	2.49	2.46
ENSG00000212743	LINC02656		10	0	1.912	-1.84873	0.960043	-1.92567	0.0541456	0.121878		0	0	0	2.02	2.49	1.23
ENSG00000260803			16	0	1.76	-1.8482	1.00494	-1.83912	0.0658971	0.144073		0	0	0	4.03	1.25	0
ENSG00000107317	PTGDS	5730	9	0	2.322	-1.8479	0.890484	-2.07516	0.0379714	0.0897808		0	0	0	2.02	2.49	2.46
ENSG00000106624	AEBP1	165	7	0	2.065	-1.84757	1.03166	-1.79088	0.0733133	0.157947		0	0	0	0	3.74	2.46
ENSG00000283317			1	0.376	3.074	-1.84746	0.931651	-1.98299	0.0473681	0.108378		0	1.13	0	3.02	3.74	2.46
ENSG00000115596	WNT6	7475	2	3.708	15.139	-1.84734	0.641629	-2.87914	0.00398757	0.0119246		5.33	3.39	2.41	23.19	7.47	14.75
ENSG00000261594	TPBGL	100507050	11	3.402	13.453	-1.84672	0.616379	-2.99608	0.0027347	0.00844949		4.26	1.13	4.82	18.15	6.23	15.98
ENSG00000227586	RPS26P39		10	0.355	2.994	-1.84567	1.01572	-1.8171	0.0692022			1.07	0	0	4.03	2.49	2.46
ENSG00000166446	CDYL2	124359	16	12.808	47.603	-1.84516	0.38055	-4.84868	1.24288e-06	6.01118e-06		10.66	16.93	10.84	46.38	41.11	55.32
ENSG00000269220	LINC00528	200298	22	0	1.907	-1.84502	1.00207	-1.84121	0.0655906	0.14358		0	0	0	2.02	1.25	2.46
ENSG00000174564	IL20RB	53833	3	22.652	82.37	-1.84493	0.227658	-8.10396	5.31987e-16	5.38909e-15		20.25	24.83	22.88	99.82	75.99	71.3
ENSG00000233589			1	0	1.975	-1.84359	1.0041	-1.83606	0.0663491	0.144895		0	0	0	1.01	0	4.92
ENSG00000168779	SHOX2	6474	3	72.671	262.102	-1.84325	0.142023	-12.9785	1.61985e-38	4.11324e-37		73.53	72.24	72.24	276.28	270.32	239.7
ENSG00000272425			8	0.355	3.336	-1.84321	0.83399	-2.21011	0.0270977	0.0667613		1.07	0	0	5.04	3.74	1.23
ENSG00000125848	FLRT3	23767	20	410.455	1474.29	-1.84313	0.100186	-18.3971	1.38582e-75	8.45078e-74		439.04	378.15	414.17	1588.11	1309.27	1525.49
ENSG00000254403	OR10Y1P		11	0	2.39	-1.843	1.04078	-1.77079	0.0765953			0	0	0	1.01	1.25	4.92
ENSG00000241749	RPSAP52	204010	12	0	2.328	-1.8419	0.866563	-2.12552	0.0335429	0.0805173		0	0	0	2.02	3.74	1.23
ENSG00000236242	MYO16-AS1	100885782	13	5.317	20.452	-1.84103	0.577742	-3.18659	0.00143959	0.00467121		6.39	1.13	8.43	24.2	21.18	15.98
ENSG00000122133	PAEP	5047	9	0.376	3.226	-1.84076	0.887186	-2.07482	0.0380029	0.0898467		0	1.13	0	1.01	4.98	3.69
ENSG00000163531	NFASC	23114	1	32.053	115.584	-1.84067	0.208844	-8.81365	1.2114e-18	1.42955e-17		31.97	30.48	33.71	113.94	129.56	103.26
ENSG00000006016	CRLF1	9244	19	7.236	27.468	-1.83919	0.419509	-4.38415	1.16441e-05	5.05144e-05		3.2	11.29	7.22	24.2	32.39	25.81
ENSG00000170581	STAT2	6773	12	4415.55	15810.7	-1.83786	0.0751851	-24.4445	5.76266e-132	7.39232e-130		4419.15	4648.45	4179.06	15966.8	16089.9	15375.3
ENSG00000205085	FAM71F2	346653	7	10.809	40.718	-1.8375	0.402122	-4.56951	4.88873e-06	2.22287e-05		12.79	12.42	7.22	34.28	44.85	43.02
ENSG00000121075	TBX4	9496	17	2.997	12.346	-1.83739	0.573397	-3.2044	0.00135344	0.00441075		3.2	3.39	2.41	11.09	9.97	15.98
ENSG00000091262	ABCC6	368	16	18.397	66.68	-1.83623	0.315195	-5.82571	5.6872e-09	3.47577e-08		15.98	7.9	31.3	61.51	64.78	73.75
ENSG00000234444	ZNF736	728927	7	0	2.407	-1.83611	0.862839	-2.12799	0.0333379	0.0800874		0	0	0	1.01	4.98	1.23
ENSG00000041880	PARP3	10039	3	430.172	1537.43	-1.83592	0.0828909	-22.1486	1.07579e-108	1.03636e-106		399.61	452.65	438.25	1537.7	1598.28	1476.32
ENSG00000266604	LINC01887		18	0	4.303	-1.83422	0.811192	-2.26114	0.0237503			0	0	0	3.02	3.74	6.15
ENSG00000113196	HAND1	9421	5	2.997	12.483	-1.83406	0.827067	-2.21755	0.0265855	0.0656301		3.2	3.39	2.41	15.12	14.95	7.38
ENSG00000250155			5	0.401	3.068	-1.83269	0.984656	-1.86125	0.0627089	0.138188		0	0	1.2	3.02	2.49	3.69
ENSG00000259404	EFL1P1		15	1.818	8.505	-1.83223	0.916409	-1.99936	0.0455692	0.104969		3.2	2.26	0	13.11	8.72	3.69
ENSG00000164266	SPINK1	6690	5	1.133	5.317	-1.82745	0.741179	-2.46559	0.0136787	0.0363991		1.07	1.13	1.2	6.05	4.98	4.92
ENSG00000105855	ITGB8	3696	7	39.927	144.424	-1.82742	0.200557	-9.11173	8.10776e-20	1.01431e-18		51.15	36.12	32.51	146.21	142.01	145.05
ENSG00000213492	NT5C3AP1		4	2.529	11.054	-1.82715	0.885796	-2.06272	0.0391396	0.0921471		5.33	2.26	0	12.1	12.46	8.6
ENSG00000285210	LINC02795		1	0	1.754	-1.82651	0.988542	-1.84768	0.0646484	0.141794		0	0	0	4.03	0	1.23
ENSG00000131914	LIN28A	79727	1	0	1.828	-1.82613	0.974597	-1.87372	0.0609684	0.135014		0	0	0	3.02	0	2.46
ENSG00000213061	PFN1P11		10	0	1.918	-1.82519	1.01139	-1.80464	0.0711312	0.153898		0	0	0	2.02	3.74	0
ENSG00000221866	PLXNA4	91584	7	23.342	83.373	-1.82467	0.299984	-6.08253	1.18298e-09	7.6751e-09		23.44	23.71	22.88	85.71	69.76	94.65
ENSG00000167617	CDC42EP5	148170	19	0.753	4.492	-1.82333	0.813643	-2.24095	0.0250292	0.0621912		0	2.26	0	6.05	3.74	3.69
ENSG00000128652	HOXD3	3232	2	6.818	25.112	-1.82321	0.475148	-3.83715	0.000124469	0.000478732		5.33	7.9	7.22	22.18	22.42	30.73
ENSG00000197635	DPP4	1803	2	7.734	29.273	-1.82272	0.345102	-5.28168	1.28005e-07	6.87003e-07		2.13	9.03	12.04	27.22	27.41	33.19
ENSG00000203804	ADAMTSL4-AS1		1	2.287	9.551	-1.82255	0.643187	-2.83363	0.00460226	0.0135986		1.07	3.39	2.41	10.08	9.97	8.6
ENSG00000125845	BMP2	650	20	3.377	14.685	-1.82219	0.462295	-3.94162	8.09319e-05	0.000318252		4.26	2.26	3.61	13.11	16.19	14.75
ENSG00000257023			12	2.692	10.549	-1.82204	0.639504	-2.84915	0.00438365	0.0130023		2.13	1.13	4.82	13.11	7.47	11.06
ENSG00000204709	LINC01556		6	6.662	25.301	-1.82158	0.570152	-3.19491	0.00139877	0.00454889		10.66	4.52	4.82	25.21	22.42	28.27
ENSG00000137571	SLCO5A1	81796	8	25.114	90.014	-1.82083	0.244722	-7.44038	1.00398e-13	8.83005e-13		27.71	25.96	21.67	80.67	98.41	90.96
ENSG00000158764	ITLN2	142683	1	3.165	12.862	-1.81928	0.825783	-2.2031	0.0275876	0.0678446		1.07	0	8.43	10.08	17.44	11.06
ENSG00000144481	TRPM8	79054	2	9.89	36.186	-1.81728	0.450955	-4.02986	5.58109e-05	0.000223986		8.53	7.9	13.24	39.32	29.9	39.34
ENSG00000226979	LTA	4049	6	1.935	8.653	-1.81718	0.818347	-2.22056	0.0263811	0.0652104		1.07	1.13	3.61	11.09	8.72	6.15
ENSG00000243370	RN7SL775P		17	0	2.254	-1.81702	1.03795	-1.75058	0.0800183	0.169629		0	0	0	3.02	3.74	0
ENSG00000117983	MUC5B	727897	11	258.292	928.799	-1.81624	0.28084	-6.46719	9.98434e-11	7.01653e-10		239.77	172.71	362.4	1166.63	621.62	998.14
ENSG00000253671		101930275	8	14.68	53.233	-1.81481	0.337671	-5.37451	7.67932e-08	4.21376e-07		14.92	14.67	14.45	43.36	59.8	56.55
ENSG00000287530			13	0	2.317	-1.8122	0.858521	-2.11084	0.0347864	0.0830913		0	0	0	2.02	1.25	3.69
ENSG00000173702	MUC13	56667	3	332.066	1165.16	-1.81072	0.11097	-16.3172	7.44816e-60	3.41484e-58		272.8	364.61	358.79	1268.47	1086.28	1140.73
ENSG00000109819	PPARGC1A	10891	4	0.757	5.385	-1.8099	0.672821	-2.69002	0.00714467	0.0203203		1.07	0	1.2	5.04	3.74	7.38
ENSG00000042980	ADAM28	10863	8	8.239	30.482	-1.80918	0.351339	-5.14937	2.61366e-07	1.3643e-06		9.59	7.9	7.22	33.27	29.9	28.27
ENSG00000188732	FAM221A	340277	7	8.64	32.388	-1.80913	0.37104	-4.87584	1.08346e-06	5.28247e-06		9.59	7.9	8.43	29.24	23.67	44.25
ENSG00000006611	USH1C	10083	11	16.582	59.033	-1.80763	0.308204	-5.86504	4.4902e-09	2.77228e-08		20.25	9.03	20.47	58.48	46.09	72.53
ENSG00000204385	SLC44A4	80736	6	1.204	6.142	-1.80666	0.650478	-2.77744	0.00547895	0.0159567		0	0	3.61	6.05	6.23	6.15
ENSG00000171551	ECEL1	9427	2	3.352	13.523	-1.80538	0.501198	-3.60212	0.000315627	0.00113663		4.26	3.39	2.41	12.1	14.95	13.52
ENSG00000010379	SLC6A13	6540	12	1.108	5.606	-1.80469	0.793018	-2.27573	0.0228623	0.0574354		1.07	2.26	0	2.02	3.74	11.06
ENSG00000143119	CD53	963	1	0.355	2.8	-1.80349	0.978234	-1.84362	0.0652385	0.142898		1.07	0	0	1.01	1.25	6.15
ENSG00000233539		730338	7	0.355	3.074	-1.80298	0.821546	-2.19462	0.0281907	0.0691241		1.07	0	0	3.02	3.74	2.46
ENSG00000139597	N4BP2L1	90634	13	4.929	18.772	-1.80256	0.452281	-3.98548	6.73432e-05	0.000267708		3.2	6.77	4.82	19.16	21.18	15.98
ENSG00000124092	CTCFL	140690	20	0.731	4.161	-1.80244	0.974203	-1.85017	0.0642884	0.141129		1.07	1.13	0	5.04	4.98	2.46
ENSG00000171659	GPR34	2857	X	0.355	3.74	-1.80233	1.028	-1.75324	0.0795606			1.07	0	0	5.04	2.49	3.69
ENSG00000050344	NFE2L3	9603	7	1418.46	4958.23	-1.80221	0.0870446	-20.7044	3.15861e-95	2.47471e-93		1382.12	1600.66	1272.62	4821.81	5024.05	5028.82
ENSG00000138061	CYP1B1	1545	2	4873.14	17010.2	-1.80176	0.0591884	-30.4411	1.5715e-203	3.56947e-201		5278.05	4471.22	4870.15	16429.7	17283.3	17317.5
ENSG00000172985	SH3RF3	344558	2	18.514	65.462	-1.79922	0.342674	-5.25052	1.5167e-07	8.0771e-07		13.85	24.83	16.86	61.51	67.27	67.61
ENSG00000141527	CARD14	79092	17	7.308	26.905	-1.798	0.383579	-4.68742	2.76668e-06	1.29387e-05		2.13	10.16	9.63	26.22	31.14	23.36
ENSG00000162692	VCAM1	7412	1	5.267	19.613	-1.79718	0.694223	-2.58877	0.00963198	0.0265496		6.39	3.39	6.02	13.11	18.69	27.04
ENSG00000122641	INHBA	3624	7	4.176	15.952	-1.79666	0.492231	-3.65002	0.000262217	0.00095667		3.2	4.52	4.82	13.11	24.91	9.83
ENSG00000103710	RASL12	51285	15	2.266	9.557	-1.79589	0.570984	-3.14526	0.00165939	0.00532647		2.13	2.26	2.41	10.08	11.21	7.38
ENSG00000127863	TNFRSF19	55504	13	95.869	334.042	-1.79507	0.186922	-9.60327	7.74486e-22	1.07002e-20		105.5	85.79	96.32	358.96	298.98	344.19
ENSG00000248610	HSPA8P4		5	0.401	2.732	-1.79423	0.952005	-1.88469	0.0594722	0.132209		0	0	1.2	2.02	2.49	3.69
ENSG00000233070	ZFY-AS1	107987337	Y	1.066	4.97	-1.79411	0.838635	-2.13932	0.03241	0.0781691		3.2	0	0	5.04	2.49	7.38
ENSG00000077080	ACTL6B	51412	7	0	2.653	-1.79347	1.02428	-1.75097	0.0799516			0	0	0	3.02	1.25	3.69
ENSG00000271447	MMP28	79148	17	36.278	126.832	-1.79284	0.223972	-8.00474	1.19723e-15	1.18092e-14		41.56	38.38	28.9	133.1	117.1	130.3
ENSG00000143226	FCGR2A	2212	1	0.757	4.167	-1.7916	0.765434	-2.34063	0.0192513	0.0493553		1.07	0	1.2	5.04	6.23	1.23
ENSG00000128254	C22orf24	25775	22	10.028	36.159	-1.79135	0.420164	-4.26346	2.0129e-05	8.52176e-05		11.72	13.55	4.82	45.37	31.14	31.96
ENSG00000255583			12	0.753	4.235	-1.79046	1.00974	-1.77319	0.0761966	0.163077		0	2.26	0	4.03	4.98	3.69
ENSG00000220378	KRT8P42		6	0.355	2.737	-1.79039	0.87837	-2.03831	0.0415185	0.0968727		1.07	0	0	2.02	3.74	2.46
ENSG00000273319			7	0.376	2.658	-1.78933	0.974143	-1.83682	0.0662364	0.1447		0	1.13	0	3.02	2.49	2.46
ENSG00000248810	LINC02432	100507639	4	1.839	7.486	-1.78889	0.640477	-2.79306	0.00522114	0.0152615		2.13	3.39	0	10.08	6.23	6.15
ENSG00000232104	RFX3-AS1	101929302	9	1.534	6.898	-1.78886	0.67758	-2.64008	0.00828872	0.0232324		1.07	1.13	2.41	7.06	8.72	4.92
ENSG00000124493	GRM4	2914	6	4.84	17.789	-1.78828	0.635864	-2.81236	0.00491789	0.0144467		6.39	4.52	3.61	21.17	17.44	14.75
ENSG00000110448	CD5	921	11	0.355	3.661	-1.78658	1.03681	-1.72315	0.0848608			1.07	0	0	6.05	1.25	3.69
ENSG00000279066	HEXD-IT1		17	1.914	7.718	-1.78462	0.769778	-2.31836	0.0204299	0.0520374		2.13	0	3.61	7.06	8.72	7.38
ENSG00000272666	KLHDC7B-DT	105373098	22	12.259	43.652	-1.78441	0.404597	-4.41033	1.03211e-05	4.50433e-05		18.12	9.03	9.63	44.37	41.11	45.48
ENSG00000286048			5	7.93	28.521	-1.78315	0.494723	-3.60434	0.000312948	0.00112829		7.46	7.9	8.43	37.31	23.67	24.58
ENSG00000276600	RAB7B	338382	1	3.018	12.015	-1.78094	0.529069	-3.36617	0.000762188	0.0025839		2.13	4.52	2.41	10.08	11.21	14.75
ENSG00000132464	ENAM	10117	4	0	1.754	-1.77951	1.00993	-1.76201	0.0780671	0.16631		0	0	0	4.03	0	1.23
ENSG00000228792			1	0	1.912	-1.77924	1.03795	-1.71418	0.086495			0	0	0	2.02	2.49	1.23
ENSG00000145451	GLRA3	8001	4	0.71	3.893	-1.77868	0.942374	-1.88745	0.0591005	0.131477		2.13	0	0	3.02	3.74	4.92
ENSG00000124102	PI3	5266	20	12.177	42.219	-1.77785	0.317618	-5.59744	2.17546e-08	1.25988e-07		9.59	11.29	15.65	47.39	44.85	34.42
ENSG00000128709	HOXD9	3235	2	6.939	24.371	-1.7778	0.416848	-4.26486	2.00024e-05	8.4711e-05		4.26	4.52	12.04	32.27	21.18	19.67
ENSG00000012171	SEMA3B	7869	3	176.276	606.874	-1.77607	0.149384	-11.8893	1.3457e-32	2.82586e-31		161.98	168.19	198.66	624.15	681.42	515.05
ENSG00000169184	MN1	4330	22	246.709	846.386	-1.77601	0.100529	-17.6667	7.57016e-70	4.24993e-68		240.83	258.5	240.8	837.92	833.4	867.84
ENSG00000246548	LINC02288	283575	14	1.509	6.546	-1.77449	0.696856	-2.54641	0.0108836	0.0296236		1.07	2.26	1.2	6.05	4.98	8.6
ENSG00000112303	VNN2	8875	6	2.554	10.817	-1.7733	0.877084	-2.02182	0.0431951	0.100237		5.33	1.13	1.2	15.12	8.72	8.6
ENSG00000128335	APOL2	23780	22	2131.49	7294.45	-1.7731	0.0606493	-29.2352	6.91983e-188	1.39285e-185		2108.87	2323.1	1962.51	7168.19	7515.51	7199.65
ENSG00000134242	PTPN22	26191	1	0	1.997	-1.77293	0.910385	-1.94745	0.0514804	0.116483		0	0	0	1.01	4.98	0
ENSG00000267265			19	9.798	35.244	-1.77236	0.335961	-5.27549	1.32398e-07	7.0966e-07		10.66	7.9	10.84	36.3	44.85	24.58
ENSG00000131044	TTLL9	164395	20	0	1.901	-1.77201	0.938994	-1.88713	0.0591423	0.131547		0	0	0	2.02	0	3.69
ENSG00000164850	GPER1	2852	7	12.494	44.815	-1.77161	0.327461	-5.41014	6.29748e-08	3.48487e-07		13.85	6.77	16.86	34.28	44.85	55.32
ENSG00000156466	GDF6	392255	8	4.151	15.677	-1.77036	0.707122	-2.50362	0.012293	0.0330924		3.2	5.64	3.61	22.18	19.93	4.92
ENSG00000199506	RNU6-247P		12	0.757	4.15	-1.76983	0.890954	-1.98644	0.0469844	0.107648		1.07	0	1.2	5.04	2.49	4.92
ENSG00000026950	BTN3A1	11119	6	508.537	1738.9	-1.76952	0.0826174	-21.4182	9.03638e-102	7.71457e-100		565.85	521.51	438.25	1857.34	1659.32	1700.04
ENSG00000163993	S100P	6286	4	281.704	959.454	-1.76892	0.0966928	-18.2942	9.19892e-75	5.56838e-73		281.33	266.4	297.39	1124.28	832.15	921.93
ENSG00000174640	SLCO2A1	6578	3	1.108	5.653	-1.76875	0.679333	-2.60366	0.00922354	0.0255232		1.07	2.26	0	7.06	4.98	4.92
ENSG00000183034	OTOP2	92736	17	1.513	6.557	-1.76742	0.796578	-2.21876	0.0265029	0.0654652		2.13	0	2.41	6.05	7.47	6.15
ENSG00000113578	FGF1	2246	5	6.584	23.495	-1.7659	0.441879	-3.99634	6.43299e-05	0.000256346		3.2	4.52	12.04	22.18	27.41	20.9
ENSG00000182575	NXPH3	11248	17	9.447	33.683	-1.7656	0.385948	-4.57471	4.76871e-06	2.17109e-05		10.66	5.64	12.04	29.24	38.62	33.19
ENSG00000224812	TMEM72-AS1	220980	10	0	1.833	-1.7656	1.04022	-1.69733	0.0896346			0	0	0	3.02	1.25	1.23
ENSG00000254143			8	8.657	30.287	-1.76484	0.50606	-3.48741	0.000487717	0.00170742		7.46	11.29	7.22	30.25	28.65	31.96
ENSG00000254612	DNAJB6P1		11	2.55	10.603	-1.76365	0.615237	-2.86663	0.0041487	0.0123602		4.26	3.39	0	7.06	12.46	12.29
ENSG00000056558	TRAF1	7185	9	311.574	1061.62	-1.76349	0.0842399	-20.9341	2.61855e-97	2.09806e-95		319.69	328.48	286.55	1023.45	1144.83	1016.58
ENSG00000008300	CELSR3	1951	3	671.952	2284.99	-1.76271	0.0705522	-24.9845	9.01815e-138	1.23354e-135		676.67	681.8	657.38	2180	2241.08	2433.89
ENSG00000277496			20	4.506	17.102	-1.76175	0.461392	-3.81833	0.000134358	0.000514609		4.26	5.64	3.61	14.12	23.67	13.52
ENSG00000080511	RDH8	50700	19	0	2.254	-1.76141	1.04012	-1.69347	0.0903654			0	0	0	3.02	3.74	0
ENSG00000260118			X	0	1.681	-1.76094	1.01258	-1.73907	0.082023	0.173211		0	0	0	5.04	0	0
ENSG00000156218	ADAMTSL3	57188	15	3.754	14.37	-1.76074	0.474347	-3.71192	0.000205695	0.000764769		4.26	3.39	3.61	12.1	21.18	9.83
ENSG00000279637			18	0.376	3.404	-1.76043	1.04057	-1.69179	0.0906855			0	1.13	0	4.03	2.49	3.69
ENSG00000224928	KRT8P30		2	0.376	2.737	-1.76038	0.989536	-1.77899	0.0752408	0.161436		0	1.13	0	2.02	3.74	2.46
ENSG00000257329			12	1.154	5.237	-1.76	0.759571	-2.31711	0.020498	0.0521679		0	2.26	1.2	7.06	3.74	4.92
ENSG00000003987	MTMR7	9108	8	0	1.981	-1.75997	0.898061	-1.95975	0.050025	0.113626		0	0	0	1.01	1.25	3.69
ENSG00000124201	ZNFX1	57169	20	7905.91	26811.8	-1.75984	0.0689946	-25.5069	1.65277e-143	2.36528e-141		8128.6	8101.48	7487.64	25528.8	26848.1	28058.6
ENSG00000260850			16	0.401	2.921	-1.75908	1.04039	-1.6908	0.0908753			0	0	1.2	5.04	2.49	1.23
ENSG00000196083	IL1RAP	3556	3	315.577	1071.87	-1.75805	0.0939232	-18.7179	3.53662e-78	2.24512e-76		330.34	308.17	308.22	1006.31	1139.85	1069.44
ENSG00000116514	RNF19B	127544	1	1580.03	5346.59	-1.75742	0.0501509	-35.0427	5.0337e-269	1.9173e-266		1594.18	1646.94	1498.97	5434.87	5218.38	5386.53
ENSG00000227199	ST7-AS1	93653	7	9.062	31.777	-1.75642	0.360477	-4.8725	1.10196e-06	5.36387e-06		8.53	9.03	9.63	43.36	26.16	25.81
ENSG00000062038	CDH3	1001	16	14.409	50.827	-1.75575	0.254323	-6.9036	5.07011e-12	3.93744e-11		9.59	19.19	14.45	58.48	43.6	50.4
ENSG00000089127	OAS1	4938	12	14962.9	50515.7	-1.75435	0.0492156	-35.6463	2.69156e-278	1.09242e-275		14942.2	16166.9	13779.7	51152.4	49501.7	50893
ENSG00000143217	NECTIN4	81607	1	33.132	112.997	-1.75435	0.179898	-9.7519	1.8104e-22	2.56125e-21		31.97	36.12	31.3	114.95	117.1	106.94
ENSG00000169436	COL22A1	169044	8	20.586	70.282	-1.75398	0.372198	-4.71247	2.44727e-06	1.14993e-05		24.51	19.19	18.06	73.61	59.8	77.44
ENSG00000227766			6	2.219	9.04	-1.75382	0.684392	-2.5626	0.0103892	0.0284254		3.2	2.26	1.2	11.09	3.74	12.29
ENSG00000197093	GAL3ST4	79690	7	3.352	12.95	-1.75348	0.559099	-3.13627	0.00171112	0.00548116		4.26	3.39	2.41	14.12	11.21	13.52
ENSG00000107105	ELAVL2	1993	9	1.513	7.24	-1.75338	0.610543	-2.87185	0.00408081	0.0121814		2.13	0	2.41	8.07	9.97	3.69
ENSG00000255571	MIR9-3HG	254559	15	6.818	24.346	-1.75094	0.408936	-4.2817	1.85475e-05	7.88325e-05		5.33	7.9	7.22	27.22	24.91	20.9
ENSG00000262823			17	0.376	2.806	-1.75036	1.00958	-1.73375	0.0829628	0.174748		0	1.13	0	1.01	2.49	4.92
ENSG00000213892	CEACAM16	388551	19	0.778	3.899	-1.74953	0.957712	-1.82678	0.0677324	0.147525		0	1.13	1.2	3.02	4.98	3.69
ENSG00000162552	WNT4	54361	1	7.884	27.23	-1.74914	0.471399	-3.71054	0.000206821	0.000768608		8.53	7.9	7.22	27.22	28.65	25.81
ENSG00000162777	DENND2D	79961	1	65.381	221.224	-1.74687	0.142839	-12.2296	2.15955e-34	4.78231e-33		62.87	77.89	55.38	225.86	200.56	237.24
ENSG00000189060	H1-0	3005	22	5696.61	19125.5	-1.74678	0.0372629	-46.8773	0	0		5643.56	5786.29	5659.97	19109.8	19254.1	19012.6
ENSG00000101194	SLC17A9	63910	20	0.355	2.915	-1.74485	0.811366	-2.15051	0.0315153	0.0763011		1.07	0	0	5.04	1.25	2.46
ENSG00000287064			1	19.425	67.279	-1.74454	0.247258	-7.05554	1.71927e-12	1.37931e-11		22.38	21.45	14.45	64.53	64.78	72.53
ENSG00000135604	STX11	8676	6	49.717	168.809	-1.74448	0.171846	-10.1514	3.26648e-24	5.01996e-23		53.28	42.89	52.98	152.26	196.83	157.34
ENSG00000256618	MTRNR2L1	100462977	17	0	1.912	-1.74419	0.923335	-1.88901	0.0588902	0.131099		0	0	0	2.02	2.49	1.23
ENSG00000140519	RHCG	51458	15	238.446	799.281	-1.74381	0.11252	-15.4978	3.59034e-54	1.42451e-52		231.24	251.73	232.37	822.79	772.36	802.69
ENSG00000197181	PIWIL2	55124	8	5.301	19.88	-1.74133	0.448377	-3.88364	0.000102906	0.000399269		2.13	10.16	3.61	15.12	19.93	24.58
ENSG00000265787	CYP4F35P	284233	18	7.549	26.458	-1.73955	0.598163	-2.90816	0.00363566	0.010957		6.39	9.03	7.22	32.27	29.9	17.21
ENSG00000170703	TTLL6	284076	17	85.381	285.437	-1.73927	0.163621	-10.6299	2.16393e-26	3.63958e-25		91.64	79.02	85.48	278.3	298.98	279.04
ENSG00000095585	BLNK	29760	10	1.158	4.754	-1.73825	0.760919	-2.28441	0.0223477	0.0562852		1.07	0	2.41	8.07	3.74	2.46
ENSG00000133055	MYBPH	4608	1	0.401	2.579	-1.73823	0.86382	-2.01226	0.0441927	0.102207		0	0	1.2	4.03	1.25	2.46
ENSG00000241106	HLA-DOB	3112	6	7.574	26.527	-1.73815	0.471238	-3.68848	0.000225596	0.000832634		6.39	7.9	8.43	20.17	31.14	28.27
ENSG00000283511			3	44.723	150.043	-1.73768	0.246403	-7.05218	1.76131e-12	1.41085e-11		39.43	41.77	52.98	153.27	139.52	157.34
ENSG00000272836			22	2.198	8.942	-1.73759	0.780024	-2.22761	0.0259066	0.0641523		4.26	1.13	1.2	7.06	7.47	12.29
ENSG00000183153	GJD3	125111	17	67.737	227.032	-1.73746	0.19572	-8.87732	6.84911e-19	8.1839e-18		75.66	55.31	72.24	225.86	216.76	238.47
ENSG00000149573	MPZL2	10205	11	0.376	3.325	-1.73662	0.76662	-2.2653	0.0234945	0.0588088		0	1.13	0	5.04	1.25	3.69
ENSG00000138316	ADAMTS14	140766	10	3.775	14.458	-1.73552	0.466752	-3.71828	0.000200583	0.00074767		3.2	4.52	3.61	16.13	14.95	12.29
ENSG00000159618	ADGRG5	221188	16	0	1.754	-1.735	0.963809	-1.80015	0.0718377	0.155183		0	0	0	4.03	0	1.23
ENSG00000139679	LPAR6	10161	13	62.015	207.314	-1.7344	0.202504	-8.56479	1.08275e-17	1.20969e-16		68.2	56.44	61.4	225.86	205.55	190.53
ENSG00000232884			21	1.179	5.054	-1.73305	0.850078	-2.03869	0.0414805	0.0968117		0	1.13	2.41	4.03	4.98	6.15
ENSG00000101670	LIPG	9388	18	26.275	88.927	-1.73128	0.227024	-7.62598	2.42195e-14	2.21428e-13		29.84	23.71	25.28	78.65	97.17	90.96
ENSG00000184574	LPAR5	57121	12	11.687	40.5	-1.73071	0.30667	-5.64355	1.66578e-08	9.73821e-08		12.79	9.03	13.24	42.35	36.13	43.02
ENSG00000259470	KRT8P9		15	0.376	2.896	-1.72928	0.953797	-1.81304	0.0698251	0.151444		0	1.13	0	0	6.23	2.46
ENSG00000167244	IGF2	3481	11	12.954	43.808	-1.72771	0.397191	-4.34982	1.36246e-05	5.86336e-05		9.59	12.42	16.86	37.31	52.32	41.79
ENSG00000197935	ZNF311	282890	6	28.299	94.884	-1.72578	0.232206	-7.4321	1.06886e-13	9.38066e-13		27.71	27.09	30.1	102.85	83.46	98.34
ENSG00000157703	SVOPL	136306	7	0	2.065	-1.72379	0.905122	-1.90449	0.0568468	0.127184		0	0	0	0	3.74	2.46
ENSG00000151572	ANO4	121601	12	0.731	3.899	-1.72197	0.853232	-2.01817	0.0435738	0.101		1.07	1.13	0	3.02	4.98	3.69
ENSG00000256646			7	0.376	2.664	-1.72167	1.01747	-1.69211	0.0906257			0	1.13	0	3.02	3.74	1.23
ENSG00000286722			7	0	2.732	-1.72163	1.00999	-1.7046	0.0882694			0	0	0	2.02	2.49	3.69
ENSG00000234829	IFNA17	3451	9	0	4.97	-1.72156	0.739949	-2.3266	0.0199868			0	0	0	5.04	2.49	7.38
ENSG00000160219	GAB3	139716	X	8.978	31.39	-1.72035	0.384944	-4.46909	7.85516e-06	3.48652e-05		12.79	4.52	9.63	26.22	26.16	41.79
ENSG00000183908	LRRC55	219527	11	2.55	10.108	-1.72011	0.881134	-1.95216	0.0509194	0.115424		4.26	3.39	0	8.07	9.97	12.29
ENSG00000272822			12	1.864	7.65	-1.72005	0.746744	-2.3034	0.0212564	0.0538544		2.13	2.26	1.2	8.07	9.97	4.92
ENSG00000167780	SOAT2	8435	12	7.6	25.837	-1.71974	0.446204	-3.85415	0.000116135	0.000448419		6.39	6.77	9.63	29.24	24.91	23.36
ENSG00000227676	LINC01068	103724388	13	0.401	2.721	-1.71943	1.00683	-1.70777	0.0876786	0.182861		0	0	1.2	2.02	0	6.15
ENSG00000129993	CBFA2T3	863	16	2.93	11.275	-1.71911	0.58368	-2.94529	0.00322649	0.00983398		5.33	2.26	1.2	9.07	12.46	12.29
ENSG00000258733	LINC02328		14	3.419	12.368	-1.71904	0.532235	-3.22986	0.00123852	0.00405973		2.13	4.52	3.61	11.09	14.95	11.06
ENSG00000182950	ODF3L1	161753	15	2.194	8.631	-1.71849	0.712403	-2.41225	0.0158544	0.0415588		3.2	3.39	0	11.09	3.74	11.06
ENSG00000166592	RRAD	6236	16	78.632	259.306	-1.71709	0.154763	-11.0949	1.32761e-28	2.40095e-27		71.4	79.02	85.48	276.28	286.52	215.12
ENSG00000267481			19	0	1.565	-1.71604	0.97674	-1.75691	0.0789334	0.167805		0	0	0	1.01	0	3.69
ENSG00000095303	PTGS1	5742	9	40.706	135.263	-1.71574	0.204053	-8.40833	4.15899e-17	4.50627e-16		38.36	44.02	39.73	131.08	137.03	137.67
ENSG00000141506	PIK3R5	23533	17	2.194	8.8	-1.71265	0.594063	-2.88295	0.00393972	0.011793		3.2	3.39	0	9.07	8.72	8.6
ENSG00000168621	GDNF	2668	5	0	1.418	-1.71263	0.969149	-1.76715	0.0772032	0.164832		0	0	0	3.02	0	1.23
ENSG00000179362	HMGN2P46		15	1.843	7.412	-1.71073	0.677687	-2.52436	0.0115908	0.0313794		3.2	1.13	1.2	11.09	6.23	4.92
ENSG00000181903	OR4C6	219432	11	0	1.565	-1.70794	0.94678	-1.80394	0.0712404	0.154068		0	0	0	1.01	0	3.69
ENSG00000278700			16	0.355	2.732	-1.70784	1.01002	-1.6909	0.0908566	0.188426		1.07	0	0	2.02	2.49	3.69
ENSG00000151834	GABRA2	2555	4	0	1.661	-1.70684	0.969811	-1.75997	0.0784124	0.166867		0	0	0	0	4.98	0
ENSG00000203364			9	0	1.571	-1.70666	1.0029	-1.70172	0.0888076	0.18478		0	0	0	1.01	1.25	2.46
ENSG00000075891	PAX2	5076	10	9.397	31.607	-1.70589	0.52258	-3.26437	0.00109709	0.00362932		10.66	7.9	9.63	29.24	32.39	33.19
ENSG00000272703			18	2.667	10.425	-1.70354	0.609708	-2.79402	0.0052057	0.01522		2.13	2.26	3.61	4.03	14.95	12.29
ENSG00000184979	USP18	11274	22	1723.88	5617.33	-1.70286	0.0635403	-26.7997	3.25701e-158	5.34019e-156		1631.47	1946.07	1594.09	5625.45	5654.39	5572.14
ENSG00000249978	TRGV7		7	2.337	8.805	-1.70259	0.832307	-2.04562	0.0407934	0.0954325		1.07	1.13	4.82	9.07	9.97	7.38
ENSG00000181804	SLC9A9	285195	3	6.734	22.821	-1.70181	0.4412	-3.85724	0.000114673	0.000443191		9.59	3.39	7.22	25.21	17.44	25.81
ENSG00000214108	TPT1P5		5	0.355	2.658	-1.70166	1.0129	-1.67998	0.0929611			1.07	0	0	3.02	2.49	2.46
ENSG00000091831	ESR1	2099	6	0.376	2.669	-1.70097	0.965086	-1.76251	0.0779835	0.166183		0	1.13	0	3.02	4.98	0
ENSG00000236056	GAPDHP14		21	0.401	2.879	-1.70092	1.03271	-1.64705	0.0995481			0	0	1.2	0	2.49	6.15
ENSG00000132334	PTPRE	5791	10	12.344	42.625	-1.70056	0.293222	-5.79955	6.64921e-09	4.03582e-08		13.85	13.55	9.63	36.3	46.09	45.48
ENSG00000123240	OPTN	10133	10	2700.42	8781	-1.69973	0.0492247	-34.5301	2.83529e-261	1.0477e-258		2831.37	2765.59	2504.31	8965.02	8556.95	8821.02
ENSG00000273174			3	2.667	9.967	-1.69949	0.728927	-2.33149	0.0197274	0.0504662		2.13	2.26	3.61	10.08	11.21	8.6
ENSG00000284691			7	97.317	317.548	-1.69881	0.142243	-11.943	7.06538e-33	1.49636e-31		90.58	103.85	97.52	300.48	328.87	323.29
ENSG00000278590	RN7SL113P		2	0.376	2.664	-1.69783	0.998545	-1.70031	0.089073	0.185223		0	1.13	0	3.02	3.74	1.23
ENSG00000015520	NPC1L1	29881	7	3.068	11.133	-1.69724	0.680199	-2.49521	0.0125884	0.0337883		2.13	2.26	4.82	11.09	13.7	8.6
ENSG00000101938	CHRDL1	91851	X	1.488	5.915	-1.69721	0.833096	-2.03723	0.041627	0.0970525		2.13	1.13	1.2	9.07	4.98	3.69
ENSG00000160471	COX6B2	125965	19	6.158	20.997	-1.69653	0.412326	-4.11454	3.8796e-05	0.000158657		3.2	5.64	9.63	33.27	16.19	13.52
ENSG00000214491	SEC14L6	730005	22	0	1.565	-1.69529	0.94647	-1.79117	0.0732654	0.157868		0	0	0	1.01	0	3.69
ENSG00000262223			17	1.509	6.062	-1.69524	0.799407	-2.12062	0.0339535	0.0813766		1.07	2.26	1.2	7.06	4.98	6.15
ENSG00000170482	SLC23A1	9963	5	31.037	100.358	-1.69511	0.248785	-6.81356	9.52141e-12	7.25996e-11		28.77	28.22	36.12	124.02	95.92	81.13
ENSG00000214376	VSTM5	387804	11	1.108	4.833	-1.69368	0.895302	-1.89174	0.0585254	0.130434		1.07	2.26	0	7.06	4.98	2.46
ENSG00000160255	ITGB2	3689	21	33.547	109.41	-1.69338	0.186545	-9.07762	1.10971e-19	1.37715e-18		22.38	36.12	42.14	107.89	115.85	104.49
ENSG00000285128			19	0	1.655	-1.69269	0.941224	-1.7984	0.0721141	0.155679		0	0	0	0	3.74	1.23
ENSG00000279720	SOWAHCP2		21	0.401	2.506	-1.69133	0.927432	-1.82367	0.0682022	0.148353		0	0	1.2	5.04	1.25	1.23
ENSG00000065618	COL17A1	1308	10	155.165	502.76	-1.69099	0.108012	-15.6556	3.04327e-55	1.24332e-53		151.32	163.68	150.5	492.06	529.44	486.78
ENSG00000261888			17	1.133	4.981	-1.68925	0.797159	-2.11909	0.0340827	0.0816304		1.07	1.13	1.2	5.04	4.98	4.92
ENSG00000167751	KLK2	3817	19	1.58	6.142	-1.68892	0.806799	-2.09336	0.0363172	0.0862652		0	1.13	3.61	6.05	6.23	6.15
ENSG00000130202	NECTIN2	5819	19	5141.6	16583.5	-1.68849	0.0507281	-33.285	6.35983e-243	1.99312e-240		5087.3	5350.57	4986.94	16854.2	16579.5	16316.9
ENSG00000285759			6	0.376	2.647	-1.68809	1.02418	-1.64823	0.099306			0	1.13	0	3.02	0	4.92
ENSG00000262681			17	1.108	5.19	-1.68746	0.785723	-2.14765	0.0317416	0.0767965		1.07	2.26	0	2.02	2.49	11.06
ENSG00000099998	GGT5	2687	22	70.782	228.021	-1.68726	0.179143	-9.4185	4.57587e-21	6.14368e-20		65	65.47	81.87	229.9	229.22	224.95
ENSG00000174225	ARL13A	392509	X	0.778	3.729	-1.68635	0.864869	-1.94983	0.0511964	0.115986		0	1.13	1.2	5.04	0	6.15
ENSG00000286393			22	0.376	2.806	-1.68549	0.940729	-1.79168	0.0731844	0.157721		0	1.13	0	1.01	2.49	4.92
ENSG00000268912			19	1.509	7.04	-1.68546	0.615224	-2.73958	0.00615174	0.017714		1.07	2.26	1.2	5.04	7.47	8.6
ENSG00000175841	FAM172BP		3	0	2.06	-1.68487	0.894838	-1.88287	0.0597173	0.132647		0	0	0	0	2.49	3.69
ENSG00000253315	LINC01932	105377682	5	0.71	3.899	-1.68312	0.967815	-1.73909	0.0820182	0.173211		2.13	0	0	3.02	4.98	3.69
ENSG00000189058	APOD	347	3	23.403	76.87	-1.6829	0.342062	-4.91988	8.65986e-07	4.26075e-06		33.03	20.32	16.86	90.75	72.25	67.61
ENSG00000140511	HAPLN3	145864	15	571.672	1837.79	-1.68267	0.090561	-18.5805	4.62256e-77	2.8683e-75		518.96	625.36	570.69	1808.94	1912.2	1792.23
ENSG00000142583	SLC2A5	6518	1	1.204	5.207	-1.68257	0.808064	-2.08222	0.0373224	0.0884238		0	0	3.61	2.02	6.23	7.38
ENSG00000198756	COLGALT2	23127	1	7.638	25.438	-1.68253	0.466251	-3.60863	0.000307819	0.00111125		3.2	11.29	8.43	23.19	19.93	33.19
ENSG00000156076	WIF1	11197	12	0	1.424	-1.68062	0.952019	-1.76533	0.0775089	0.165328		0	0	0	3.02	1.25	0
ENSG00000272851			2	1.158	5.144	-1.68041	0.793001	-2.11906	0.0340858	0.0816304		1.07	0	2.41	3.02	8.72	3.69
ENSG00000167434	CA4	762	17	1.133	5.071	-1.68019	0.975165	-1.72298	0.0848924	0.178176		1.07	1.13	1.2	4.03	8.72	2.46
ENSG00000135828	RNASEL	6041	1	237.48	762.976	-1.68013	0.0980774	-17.1306	8.76882e-66	4.60931e-64		234.44	270.91	207.09	801.62	737.47	749.84
ENSG00000082684	SEMA5B	54437	3	0.71	3.819	-1.6801	0.794908	-2.11358	0.0345508	0.0826083		2.13	0	0	4.03	3.74	3.69
ENSG00000188910	GJB3	2707	1	41.689	134.94	-1.67976	0.204506	-8.21376	2.14364e-16	2.23087e-15		33.03	46.28	45.75	125.03	149.49	130.3
ENSG00000244357	RN7SL145P		3	0.376	2.664	-1.67854	0.961104	-1.74647	0.0807299	0.17102		0	1.13	0	3.02	3.74	1.23
ENSG00000204540	PSORS1C1	170679	6	45.923	148.843	-1.6784	0.213663	-7.85539	3.98532e-15	3.8096e-14		44.76	49.67	43.34	142.17	148.24	156.11
ENSG00000157111	TMEM171	134285	5	42.032	134.945	-1.6776	0.202483	-8.28515	1.1796e-16	1.24275e-15		30.9	53.05	42.14	146.21	129.56	129.07
ENSG00000279159			22	0.355	2.811	-1.6774	0.885619	-1.89404	0.0582197	0.129856		1.07	0	0	1.01	3.74	3.69
ENSG00000196711	ALKAL1	389658	8	0.401	2.817	-1.67679	1.01877	-1.64589	0.0997861	0.203619		0	0	1.2	1.01	4.98	2.46
ENSG00000268223	ARL14EPL	644100	5	6.73	23.801	-1.67612	0.371908	-4.50682	6.5805e-06	2.94186e-05		8.53	5.64	6.02	18.15	29.9	23.36
ENSG00000150873	C2orf50	130813	2	8.711	29.169	-1.67583	0.412782	-4.05984	4.91071e-05	0.000198608		8.53	6.77	10.84	23.19	29.9	34.42
ENSG00000241439			3	0.803	3.656	-1.67578	0.833358	-2.01088	0.0443383	0.102476		0	0	2.41	6.05	0	4.92
ENSG00000233845			2	0	1.655	-1.67563	0.950777	-1.76238	0.0780056	0.166202		0	0	0	0	3.74	1.23
ENSG00000109705	NKX3-2	579	4	7.621	25.312	-1.67512	0.417091	-4.01619	5.91455e-05	0.000236601		5.33	7.9	9.63	25.21	24.91	25.81
ENSG00000147689	FAM83A	84985	8	27.263	89.343	-1.67502	0.19747	-8.4824	2.20589e-17	2.42727e-16		25.58	23.71	32.51	88.73	79.73	99.57
ENSG00000133246	PRAM1	84106	19	1.91	7.319	-1.675	0.709549	-2.36065	0.018243	0.0470627		1.07	2.26	2.41	7.06	11.21	3.69
ENSG00000106038	EVX1	2128	7	1.868	7.907	-1.67431	1.0013	-1.67214	0.0944965	0.194735		3.2	0	2.41	10.08	8.72	4.92
ENSG00000231704			7	0.376	2.811	-1.67415	1.00465	-1.66641	0.0956323	0.196683		0	1.13	0	1.01	3.74	3.69
ENSG00000186818	LILRB4	11006	19	0	2.847	-1.67366	1.00746	-1.66126	0.0966612			0	0	0	6.05	2.49	0
ENSG00000127241	MASP1	5648	3	0.376	2.653	-1.67358	0.846704	-1.97658	0.0480894	0.109761		0	1.13	0	3.02	1.25	3.69
ENSG00000263874	LINC00672		17	14.016	45.896	-1.6735	0.325667	-5.13868	2.76677e-07	1.44058e-06		11.72	14.67	15.65	47.39	42.35	47.94
ENSG00000237505	PKN2-AS1	101927891	1	0.401	2.989	-1.67305	0.819269	-2.04212	0.0411395	0.096097		0	0	1.2	4.03	1.25	3.69
ENSG00000163295	ALPI	248	2	0	1.571	-1.67199	1.00466	-1.66423	0.0960656	0.197426		0	0	0	1.01	1.25	2.46
ENSG00000224950			1	4.134	14.6	-1.67126	0.502312	-3.32714	0.000877427	0.00294434		5.33	2.26	4.82	14.12	13.7	15.98
ENSG00000214417	KRT18P13		9	0	1.918	-1.67124	1.04172	-1.60431	0.108646			0	0	0	2.02	3.74	0
ENSG00000286016			12	6.061	20.694	-1.67052	0.592523	-2.81934	0.00481225	0.0141599		4.26	7.9	6.02	15.12	18.69	28.27
ENSG00000204010	IFIT1B	439996	10	2.6	9.447	-1.66987	0.781385	-2.13706	0.0325929	0.0785567		4.26	1.13	2.41	6.05	12.46	9.83
ENSG00000181634	TNFSF15	9966	9	62.07	198.638	-1.66986	0.165875	-10.0669	7.73418e-24	1.16616e-22		62.87	64.34	59	198.64	203.05	194.22
ENSG00000272094			1	0.376	2.817	-1.66977	1.03099	-1.61958	0.105323	0.212794		0	1.13	0	1.01	4.98	2.46
ENSG00000158467	AHCYL2	23382	7	967.223	3076.85	-1.66964	0.066072	-25.2701	6.8152e-141	9.47925e-139		977.18	914.34	1010.15	3379.91	2837.78	3012.87
ENSG00000261359	PYCARD-AS1	100652740	16	7.959	26.451	-1.66881	0.490163	-3.4046	0.0006626	0.00227243		8.53	4.52	10.84	26.22	21.18	31.96
ENSG00000164171	ITGA2	3673	5	3215.51	10249.2	-1.66763	0.112189	-14.8645	5.6061e-50	2.00862e-48		3347.13	3125.68	3173.73	10157.9	9750.36	10839.4
ENSG00000213493	ACTN4P1		4	0.376	2.748	-1.66723	1.03588	-1.60948	0.107512			0	1.13	0	2.02	6.23	0
ENSG00000021355	SERPINB1	1992	6	1868.56	5939.28	-1.66664	0.0504758	-33.0185	4.40857e-239	1.31503e-236		1974.61	1900.92	1730.14	6117.51	5881.11	5819.22
ENSG00000258240		105369980	12	1.463	6.357	-1.6658	0.673029	-2.47508	0.0133205	0.0355528		2.13	2.26	0	3.02	4.98	11.06
ENSG00000120899	PTK2B	2185	8	779.958	2472.86	-1.66568	0.0547765	-30.4087	4.21198e-203	9.39461e-201		741.68	769.85	828.35	2497.62	2437.9	2483.06
ENSG00000102575	ACP5	54	19	2.667	10.029	-1.66519	0.533335	-3.12222	0.00179493	0.00572076		2.13	2.26	3.61	9.07	8.72	12.29
ENSG00000279511			13	0.803	3.819	-1.66467	0.792585	-2.10031	0.0357017	0.0850458		0	0	2.41	4.03	3.74	3.69
ENSG00000171450	CDK5R2	8941	2	70.737	225.614	-1.66376	0.213351	-7.79824	6.27782e-15	5.94592e-14		59.68	77.89	74.65	201.67	237.94	237.24
ENSG00000223711			3	0	1.492	-1.66257	0.976567	-1.70247	0.0886678	0.184643		0	0	0	2.02	0	2.46
ENSG00000287349			4	0	1.571	-1.6625	0.981258	-1.69426	0.0902164	0.187255		0	0	0	1.01	1.25	2.46
ENSG00000153094	BCL2L11	10018	2	478.727	1517.51	-1.66242	0.0741972	-22.4054	3.48619e-111	3.48029e-109		483.79	469.59	482.8	1524.59	1416.4	1611.53
ENSG00000232713	RPS12P3		2	0	1.571	-1.66117	1.0087	-1.64683	0.0995923	0.203273		0	0	0	1.01	1.25	2.46
ENSG00000177993	ZNRF3-AS1	100874123	22	1.86	7.529	-1.66114	0.671296	-2.47452	0.0133415	0.0356051		1.07	4.52	0	4.03	8.72	9.83
ENSG00000171246	NPTX1	4884	17	4136.42	13077	-1.65949	0.0545252	-30.4354	1.87113e-203	4.2114e-201		3935.36	4480.26	3993.65	12738.2	13209.8	13283.2
ENSG00000130940	CASZ1	54897	1	153.931	487.639	-1.65939	0.11555	-14.3609	9.10855e-47	3.01081e-45		156.65	154.65	150.5	499.12	469.64	494.15
ENSG00000124253	PCK1	5105	20	0.803	3.667	-1.65934	0.977698	-1.6972	0.0896598	0.186287		0	0	2.41	6.05	2.49	2.46
ENSG00000174343	CHRNA9	55584	4	10.831	35.741	-1.65796	0.301301	-5.50268	3.74064e-08	2.11392e-07		11.72	13.55	7.22	40.33	38.62	28.27
ENSG00000168743	NPNT	255743	4	5.405	18.569	-1.65782	0.414477	-3.99979	6.3398e-05	0.000252714		3.2	3.39	9.63	11.09	27.41	17.21
ENSG00000259354			15	2.194	8.475	-1.65738	0.640446	-2.58786	0.00965747	0.0266169		3.2	3.39	0	8.07	11.21	6.15
ENSG00000250325	IGBP1P4		4	0	1.497	-1.65692	1.01671	-1.62969	0.103168			0	0	0	2.02	1.25	1.23
ENSG00000277911			17	0	1.986	-1.65654	1.04194	-1.58987	0.111864			0	0	0	1.01	2.49	2.46
ENSG00000164308	ERAP2	64167	5	207.743	658.225	-1.65618	0.128237	-12.915	3.70396e-38	9.31938e-37		231.24	224.63	167.36	688.69	665.22	620.77
ENSG00000179954	SSC5D	284297	19	29.591	94.826	-1.65582	0.267072	-6.19989	5.65043e-10	3.74982e-09		24.51	29.35	34.92	93.77	105.89	84.82
ENSG00000229207	SERPINH1P1		9	0.376	2.585	-1.65563	0.97214	-1.70308	0.0885539	0.184431		0	1.13	0	4.03	2.49	1.23
ENSG00000213149	CNN2P9		6	0.376	2.737	-1.65547	0.931264	-1.77766	0.0754594	0.161849		0	1.13	0	2.02	3.74	2.46
ENSG00000130592	LSP1	4046	11	3.402	11.967	-1.65509	0.699875	-2.36483	0.0180382	0.0465975		4.26	1.13	4.82	16.13	7.47	12.29
ENSG00000173918	C1QTNF1	114897	17	771.885	2432.8	-1.65504	0.0710085	-23.3076	3.71088e-120	4.13847e-118		749.14	829.68	736.84	2403.85	2486.49	2408.08
ENSG00000259644			15	0.401	2.59	-1.65464	0.974193	-1.69847	0.0894194	0.185866		0	0	1.2	4.03	3.74	0
ENSG00000068079	IFI35	3430	17	4876.9	15362.4	-1.65443	0.0563394	-29.3655	1.51553e-189	3.07553e-187		4485.22	5413.78	4731.7	15487.9	15403.5	15195.9
ENSG00000111728	ST8SIA1	6489	12	0.803	4.057	-1.65286	0.772974	-2.13831	0.0324914	0.078335		0	0	2.41	1.01	7.47	3.69
ENSG00000133661	SFTPD	6441	10	1.179	5.164	-1.65133	0.803741	-2.05455	0.0399223	0.0937845		0	1.13	2.41	8.07	3.74	3.69
ENSG00000286391		107985206	1	0.376	3.399	-1.65086	1.01906	-1.61999	0.105235			0	1.13	0	4.03	1.25	4.92
ENSG00000278965			5	0	2.585	-1.64919	1.00467	-1.64153	0.100687			0	0	0	4.03	2.49	1.23
ENSG00000108821	COL1A1	1277	17	312.015	981.381	-1.6482	0.129076	-12.7692	2.43504e-37	5.98082e-36		270.67	313.81	351.57	935.73	1009.04	999.37
ENSG00000266306			17	1.488	5.978	-1.64819	0.922356	-1.78693	0.0739484	0.159125		2.13	1.13	1.2	8.07	2.49	7.38
ENSG00000226508	LINC01918	105373984	2	0.376	5.122	-1.6481	0.841867	-1.95768	0.0502681			0	1.13	0	3.02	3.74	8.6
ENSG00000182489	XKRX	402415	X	11.361	36.749	-1.64807	0.35642	-4.62395	3.76492e-06	1.73256e-05		12.79	5.64	15.65	37.31	31.14	41.79
ENSG00000274376	ADAMTS7P1		15	0.401	2.842	-1.64802	1.04119	-1.58283	0.113461			0	0	1.2	6.05	1.25	1.23
ENSG00000272914			10	1.86	7.229	-1.64773	0.717931	-2.29511	0.0217269	0.0549004		1.07	4.52	0	8.07	7.47	6.15
ENSG00000230834			11	0.731	3.661	-1.64759	0.791299	-2.08214	0.0373299	0.0884331		1.07	1.13	0	6.05	1.25	3.69
ENSG00000238121	LINC00426	100188949	13	0	1.65	-1.64684	1.0079	-1.63394	0.102271	0.207731		0	0	0	0	2.49	2.46
ENSG00000166825	ANPEP	290	15	921.365	2887.73	-1.64621	0.0713282	-23.0794	7.4554e-118	8.06029e-116		896.19	968.52	899.38	2772.9	2954.88	2935.42
ENSG00000255931			11	0	1.492	-1.64611	0.998987	-1.64777	0.099399	0.202979		0	0	0	2.02	0	2.46
ENSG00000167588	GPD1	2819	12	4.552	15.95	-1.6455	0.622728	-2.64241	0.00823178	0.0230911		3.2	5.64	4.82	18.15	14.95	14.75
ENSG00000135643	KCNMB4	27345	12	3.842	13.518	-1.64548	0.467195	-3.52205	0.000428227	0.00151048		1.07	5.64	4.82	12.1	13.7	14.75
ENSG00000136826	KLF4	9314	9	652.878	2044.53	-1.64544	0.0587145	-28.0244	8.19792e-173	1.49238e-170		627.65	660.36	670.62	1961.19	2162.59	2009.81
ENSG00000286313			6	0.355	2.732	-1.64537	1.01507	-1.62094	0.10503	0.212377		1.07	0	0	2.02	2.49	3.69
ENSG00000105289	TJP3	27134	19	119.074	375.486	-1.64481	0.155938	-10.5478	5.19745e-26	8.60151e-25		145.99	82.4	128.83	379.13	367.49	379.83
ENSG00000232110			10	2.667	9.71	-1.64432	0.649123	-2.53315	0.0113044	0.0306946		2.13	2.26	3.61	8.07	12.46	8.6
ENSG00000287221			10	0.778	3.814	-1.64392	0.81334	-2.02119	0.0432601	0.10034		0	1.13	1.2	4.03	2.49	4.92
ENSG00000204421	LY6G6C	80740	6	0.757	3.899	-1.6433	0.806071	-2.03865	0.0414846	0.0968117		1.07	0	1.2	3.02	4.98	3.69
ENSG00000214212	C19orf38	255809	19	2.621	9.63	-1.64304	0.621207	-2.64491	0.00817123	0.0229343		3.2	2.26	2.41	9.07	11.21	8.6
ENSG00000107859	PITX3	5309	10	5.572	18.651	-1.64236	0.499234	-3.28976	0.00100275	0.00333862		7.46	5.64	3.61	15.12	19.93	20.9
ENSG00000165806	CASP7	840	10	1375.25	4296.33	-1.64178	0.0481567	-34.0924	9.55442e-255	3.28539e-252		1403.43	1408.76	1313.56	4265.22	4226.78	4396.99
ENSG00000141449	GREB1L	80000	18	100.263	314.376	-1.6412	0.131996	-12.4337	1.71465e-35	3.96001e-34		100.17	97.08	103.54	320.65	315.17	307.31
ENSG00000189431	RASSF10	644943	11	631.154	1970.44	-1.64109	0.0825125	-19.889	5.06316e-88	3.66531e-86		607.41	666	620.06	1961.19	2086.6	1863.53
ENSG00000105219	CCNP	79935	19	3.445	11.947	-1.6388	0.513199	-3.1933	0.00140659	0.00457071		2.13	3.39	4.82	11.09	12.46	12.29
ENSG00000167676	PLIN4	729359	19	26.151	83.087	-1.63796	0.285469	-5.73776	9.59377e-09	5.7442e-08		23.44	23.71	31.3	57.47	94.68	97.11
ENSG00000060558	GNA15	2769	19	2.759	10.139	-1.63776	0.518114	-3.161	0.00157228	0.0050679		0	2.26	6.02	13.11	7.47	9.83
ENSG00000105737	GRIK5	2901	19	30.72	97.614	-1.63761	0.312325	-5.24329	1.57742e-07	8.38245e-07		30.9	38.38	22.88	105.87	102.15	84.82
ENSG00000110944	IL23A	51561	12	8.665	28.35	-1.63752	0.387904	-4.22145	2.42741e-05	0.000101826		9.59	6.77	9.63	23.19	29.9	31.96
ENSG00000276121			15	0	2.071	-1.63751	1.03894	-1.57613	0.114996			0	0	0	0	4.98	1.23
ENSG00000158553	POM121L2	94026	6	0.71	3.636	-1.63669	0.961673	-1.70191	0.0887713	0.18472		2.13	0	0	1.01	4.98	4.92
ENSG00000166148	AVPR1A	552	12	2.219	7.994	-1.63639	0.833586	-1.96307	0.049638	0.11285		3.2	2.26	1.2	14.12	2.49	7.38
ENSG00000113749	HRH2	3274	5	81.696	255.412	-1.63638	0.230314	-7.10502	1.20305e-12	9.75603e-12		78.86	71.12	95.12	203.68	245.41	317.14
ENSG00000286839		105379127	5	0	1.492	-1.63598	0.93434	-1.75095	0.0799544	0.169566		0	0	0	2.02	0	2.46
ENSG00000280734	LINC01232		13	54.754	171.421	-1.63564	0.168543	-9.70459	2.88228e-22	4.04074e-21		58.61	58.7	46.96	187.55	165.68	161.03
ENSG00000259287			15	2.734	9.682	-1.63558	0.680598	-2.40315	0.0162546	0.0425087		0	3.39	4.82	8.07	6.23	14.75
ENSG00000166405	RIC3	79608	11	23.066	72.691	-1.63516	0.338288	-4.83364	1.34056e-06	6.45964e-06		23.44	18.06	27.69	69.57	74.74	73.75
ENSG00000180061	TMEM150B	284417	19	0.376	2.328	-1.63425	0.995593	-1.64148	0.100698	0.205011		0	1.13	0	2.02	3.74	1.23
ENSG00000256209			12	0	1.571	-1.6338	0.939293	-1.73939	0.0819659	0.173149		0	0	0	1.01	1.25	2.46
ENSG00000205181	LINC00654	149837	20	3.708	12.641	-1.63354	0.627395	-2.60368	0.00922294	0.0255232		5.33	3.39	2.41	13.11	17.44	7.38
ENSG00000286943			11	0	1.576	-1.63346	1.0047	-1.62581	0.10399	0.210565		0	0	0	1.01	2.49	1.23
ENSG00000118503	TNFAIP3	7128	6	738.349	2294.33	-1.63316	0.0670086	-24.3724	3.35963e-131	4.24376e-129		769.38	728.08	717.58	2258.65	2317.07	2307.28
ENSG00000142910	TINAGL1	64129	1	13.209	43.311	-1.63141	0.272436	-5.98824	2.12127e-09	1.34559e-08		10.66	16.93	12.04	43.36	39.86	46.71
ENSG00000215795			1	0.71	3.483	-1.63138	0.918227	-1.77667	0.075623	0.162124		2.13	0	0	3.02	3.74	3.69
ENSG00000284128			22	1.889	7.161	-1.62993	0.845476	-1.92782	0.053877	0.121329		2.13	1.13	2.41	9.07	8.72	3.69
ENSG00000074706	IPCEF1	26034	6	0.401	2.885	-1.62949	0.849168	-1.91892	0.0549941	0.123642		0	0	1.2	0	3.74	4.92
ENSG00000130300	PLVAP	83483	19	0.355	2.585	-1.62925	1.03409	-1.57554	0.115133			1.07	0	0	4.03	2.49	1.23
ENSG00000258603			14	1.822	7.133	-1.62912	0.630935	-2.58208	0.00982082	0.027028		4.26	0	1.2	9.07	2.49	9.83
ENSG00000281538			22	0.355	2.8	-1.6278	0.883157	-1.84316	0.0653055	0.143032		1.07	0	0	1.01	1.25	6.15
ENSG00000286714			3	0.355	2.885	-1.62777	1.04026	-1.56477	0.117638			1.07	0	0	0	3.74	4.92
ENSG00000258689	LINC01269	103695436	14	4.155	13.922	-1.62722	0.499091	-3.26037	0.00111269	0.00367746		4.26	3.39	4.82	12.1	12.46	17.21
ENSG00000140464	PML	5371	15	3007.51	9303.63	-1.62714	0.06714	-24.235	9.50856e-130	1.18298e-127		3006.13	3289.36	2727.05	8850.07	9579.69	9481.12
ENSG00000129009	ISLR	3671	15	4.815	16.086	-1.62689	0.614809	-2.64617	0.0081409	0.0228569		6.39	5.64	2.41	16.13	12.46	19.67
ENSG00000123685	BATF3	55509	1	180.392	558.237	-1.6265	0.112002	-14.522	8.78728e-48	2.9884e-46		175.83	190.77	174.58	554.58	579.27	540.87
ENSG00000183742	MACC1	346389	7	0	2.065	-1.6264	0.875506	-1.85767	0.0632159	0.139108		0	0	0	0	3.74	2.46
ENSG00000287356			1	5.668	19.168	-1.62426	0.458102	-3.54563	0.000391676	0.00139126		6.39	3.39	7.22	14.12	27.41	15.98
ENSG00000163638	ADAMTS9	56999	3	14.037	43.938	-1.62393	0.391711	-4.14573	3.38733e-05	0.00013954		10.66	15.8	15.65	35.29	48.58	47.94
ENSG00000140807	NKD1	85407	16	68.352	211.291	-1.62266	0.204679	-7.92786	2.2296e-15	2.15711e-14		72.46	69.99	62.61	221.83	204.3	207.74
ENSG00000137842	TMEM62	80021	15	842.139	2594.26	-1.62253	0.0673737	-24.0825	3.8141e-128	4.6517e-126		767.25	956.1	803.06	2645.85	2594.86	2542.07
ENSG00000230333			7	0	1.503	-1.62219	1.02809	-1.57787	0.114595			0	0	0	2.02	2.49	0
ENSG00000143365	RORC	6097	1	4.13	14.221	-1.622	0.471735	-3.43837	0.000585238	0.00202393		4.26	4.52	3.61	19.16	11.21	12.29
ENSG00000100314	CABP7	164633	22	8.31	26.427	-1.61965	0.50513	-3.20641	0.00134401	0.0043835		8.53	6.77	9.63	27.22	32.39	19.67
ENSG00000258830			12	0	1.492	-1.61926	1.02157	-1.58508	0.112949	0.225246		0	0	0	2.02	0	2.46
ENSG00000155158	TTC39B	158219	9	142.884	440.546	-1.61738	0.129004	-12.5374	4.65753e-36	1.09925e-34		167.3	125.3	136.05	449.71	401.13	470.8
ENSG00000231826	LINC01819	102723854	2	0	1.639	-1.61706	1.0178	-1.58878	0.11211	0.223913		0	0	0	0	0	4.92
ENSG00000184988	TMEM106A	113277	17	191.393	588.468	-1.61579	0.134949	-11.9734	4.90031e-33	1.04228e-31		199.27	209.96	164.95	623.15	579.27	562.99
ENSG00000178395	CCDC185	164127	1	0	1.644	-1.61549	1.03313	-1.56368	0.117892	0.233352		0	0	0	0	1.25	3.69
ENSG00000255774	LINC02747	105379407	11	41.517	127.541	-1.61381	0.207972	-7.75976	8.50927e-15	8.00428e-14		40.49	39.51	44.55	112.93	129.56	140.13
ENSG00000272669			22	32.89	101.799	-1.61358	0.250353	-6.44523	1.15424e-10	8.07933e-10		27.71	37.25	33.71	105.87	122.08	77.44
ENSG00000218336	TENM3	55714	4	43.325	135.742	-1.61341	0.263391	-6.12554	9.03752e-10	5.89905e-09		54.35	21.45	54.18	123.02	112.12	172.09
ENSG00000197444	OGDHL	55753	10	10.229	32.238	-1.6133	0.33915	-4.75688	1.96603e-06	9.32651e-06		5.33	16.93	8.43	32.27	39.86	24.58
ENSG00000125148	MT2A	4502	16	5730.56	17542.2	-1.61087	0.0923667	-17.44	4.1043e-68	2.2481e-66		5233.29	6611.45	5346.94	16160.4	18722.1	17744.1
ENSG00000176092	CRYBG2	55057	1	25.771	80.442	-1.6105	0.204474	-7.87629	3.37246e-15	3.24003e-14		22.38	24.83	30.1	76.63	90.94	73.75
ENSG00000232600	TONSL-AS1		8	0.376	2.737	-1.6103	0.90926	-1.77101	0.0765597	0.16367		0	1.13	0	2.02	3.74	2.46
ENSG00000250509			5	2.283	8.286	-1.6091	0.682964	-2.35605	0.0184704	0.0475848		0	5.64	1.2	5.04	11.21	8.6
ENSG00000236438	FAM157A		3	1.957	7.254	-1.60853	0.59843	-2.68791	0.00719011	0.020433		0	2.26	3.61	13.11	3.74	4.92
ENSG00000135750	KCNK1	3775	1	358.243	1093.45	-1.60801	0.0773824	-20.78	6.56292e-96	5.20784e-94		376.17	339.77	358.79	1123.27	1095	1062.06
ENSG00000095539	SEMA4G	57715	10	766.773	2338.21	-1.60798	0.0906489	-17.7385	2.11518e-70	1.20109e-68		731.02	715.67	853.63	2568.21	2062.94	2383.49
ENSG00000226051	ZNF503-AS1	253264	10	0.778	3.819	-1.607	0.996851	-1.61208	0.106945	0.215477		0	1.13	1.2	4.03	3.74	3.69
ENSG00000167550	RHEBL1	121268	12	204.989	625.286	-1.60688	0.111019	-14.474	1.76966e-47	5.95289e-46		192.88	206.57	215.51	621.13	625.36	629.37
ENSG00000001617	SEMA3F	6405	3	405.969	1239.16	-1.60608	0.100628	-15.9605	2.40837e-57	1.04242e-55		386.82	465.07	366.01	1200.92	1230.79	1285.78
ENSG00000162878	PKDCC	91461	2	1138.01	3462.47	-1.60489	0.0684398	-23.4497	1.33083e-121	1.51838e-119		1061.36	1192.03	1160.65	3485.78	3578.99	3322.63
ENSG00000128578	STRIP2	57464	7	526.326	1604.26	-1.60474	0.0747076	-21.4802	2.38263e-102	2.04824e-100		560.52	526.03	492.43	1640.55	1638.14	1534.09
ENSG00000172382	PRSS27	83886	16	21.151	65.633	-1.60424	0.27119	-5.91556	3.30752e-09	2.0637e-08		21.31	18.06	24.08	58.48	56.06	82.36
ENSG00000235920	THRAP3P3		7	10.927	33.786	-1.60377	0.478706	-3.35022	0.000807485	0.00272627		10.66	11.29	10.84	44.37	33.63	23.36
ENSG00000287544			4	0.355	2.811	-1.60347	1.04102	-1.54029	0.12349			1.07	0	0	1.01	3.74	3.69
ENSG00000233723	LINC01122		2	0	1.424	-1.60301	0.976594	-1.64143	0.100709	0.205011		0	0	0	3.02	1.25	0
ENSG00000187905	LRRC74B	400891	22	0	1.981	-1.60214	1.04138	-1.53847	0.123934	0.243		0	0	0	1.01	1.25	3.69
ENSG00000274833			17	0.355	2.989	-1.60213	1.03661	-1.54554	0.122215	0.240198		1.07	0	0	4.03	1.25	3.69
ENSG00000225530	SP3P		13	0.778	3.519	-1.60042	0.987782	-1.62022	0.105185	0.212637		0	1.13	1.2	8.07	2.49	0
ENSG00000182271	TMIGD1	388364	17	0	1.497	-1.59985	0.928034	-1.72391	0.0847233	0.177897		0	0	0	2.02	1.25	1.23
ENSG00000138135	CH25H	9023	10	20.654	62.761	-1.59969	0.26915	-5.94349	2.79016e-09	1.74972e-08		22.38	20.32	19.26	64.53	62.29	61.46
ENSG00000278035			20	3.445	11.758	-1.59955	0.700108	-2.28471	0.0223297	0.0562457		2.13	3.39	4.82	8.07	12.46	14.75
ENSG00000243635			3	7.202	22.611	-1.59893	0.598444	-2.67181	0.00754439	0.0213345		7.46	4.52	9.63	28.23	19.93	19.67
ENSG00000157856	DRC1	92749	2	12.561	38.861	-1.59868	0.426207	-3.75095	0.000176166	0.000662542		11.72	7.9	18.06	42.35	36.13	38.11
ENSG00000146197	SCUBE3	222663	6	14.634	45.622	-1.59861	0.336605	-4.74922	2.04206e-06	9.67049e-06		15.98	14.67	13.24	45.37	39.86	51.63
ENSG00000158486	DNAH3	55567	16	21.687	67.097	-1.59861	0.288041	-5.54993	2.85778e-08	1.63628e-07		17.05	20.32	27.69	50.42	68.52	82.36
ENSG00000272735			2	0.401	2.653	-1.59673	0.878409	-1.81775	0.0691019	0.150108		0	0	1.2	3.02	1.25	3.69
ENSG00000234427			6	0.401	2.475	-1.59427	0.943689	-1.6894	0.0911426	0.18894		0	0	1.2	0	3.74	3.69
ENSG00000256234			12	0	1.497	-1.59416	1.03736	-1.53675	0.124354			0	0	0	2.02	1.25	1.23
ENSG00000060140	STYK1	55359	12	22.288	68.166	-1.59397	0.23264	-6.85167	7.29931e-12	5.61231e-11		23.44	16.93	26.49	80.67	68.52	55.32
ENSG00000164512	ANKRD55	79722	5	2.575	8.879	-1.59356	0.63474	-2.51057	0.0120537	0.0325223		4.26	2.26	1.2	8.07	9.97	8.6
ENSG00000108551	RASD1	51655	17	41.663	126.308	-1.59345	0.231776	-6.87496	6.20054e-12	4.78234e-11		39.43	34.99	50.57	156.29	103.4	119.24
ENSG00000262533			17	0	1.582	-1.59336	1.0044	-1.58638	0.112654	0.224727		0	0	0	1.01	3.74	0
ENSG00000135899	SP110	3431	2	3046.72	9199.7	-1.59286	0.057314	-27.7917	5.4627e-170	9.87194e-168		3107.37	3278.07	2754.74	9306.85	9001.67	9290.59
ENSG00000214402	LCNL1	401562	9	0	1.992	-1.59258	0.900932	-1.7677	0.0771104	0.164677		0	0	0	1.01	3.74	1.23
ENSG00000134363	FST	10468	5	688.277	2078.25	-1.59232	0.071621	-22.2326	1.66141e-109	1.62582e-107		715.04	703.25	646.54	2093.28	2147.65	1993.83
ENSG00000179978	NAIPP2		5	0.753	3.888	-1.59222	0.791036	-2.01283	0.0441325	0.102087		0	2.26	0	3.02	2.49	6.15
ENSG00000250280			12	0.401	2.585	-1.59196	1.03774	-1.53407	0.125013			0	0	1.2	4.03	2.49	1.23
ENSG00000267742	SINHCAFP2		18	1.158	4.675	-1.59193	0.805298	-1.97683	0.0480614	0.109719		1.07	0	2.41	9.07	2.49	2.46
ENSG00000096968	JAK2	3717	9	324.933	979.599	-1.59191	0.0875081	-18.1916	6.02102e-74	3.59201e-72		330.34	302.52	341.93	1040.59	948	950.2
ENSG00000162595	DIRAS3	9077	1	11.733	36.631	-1.59101	0.399895	-3.97857	6.93322e-05	0.000275128		11.72	9.03	14.45	34.28	47.34	28.27
ENSG00000228775	WEE2-AS1	285962	7	4.954	16.078	-1.59041	0.516386	-3.07988	0.00207083	0.00653201		3.2	5.64	6.02	11.09	19.93	17.21
ENSG00000229951		403150	2	2.98	10.223	-1.5898	0.568686	-2.79557	0.0051809	0.0151528		5.33	0	3.61	12.1	9.97	8.6
ENSG00000124915	MYRF-AS1	26070	11	3.97	13.248	-1.58891	0.641388	-2.4773	0.0132381	0.0353445		8.53	3.39	0	21.17	9.97	8.6
ENSG00000156500	FAM122C	159091	X	83.272	253.929	-1.5886	0.175415	-9.05625	1.3501e-19	1.67045e-18		110.83	82.4	56.59	253.09	262.85	245.85
ENSG00000282882			17	0	1.418	-1.58801	0.963942	-1.64741	0.0994732	0.203098		0	0	0	3.02	0	1.23
ENSG00000111912	NCOA7	135112	6	4751.59	14298.9	-1.58773	0.0614582	-25.8343	3.65125e-147	5.47865e-145		5271.65	4517.51	4465.61	14386.8	14125.4	14384.6
ENSG00000218016	ZNF192P2		6	0	1.918	-1.5869	1.03853	-1.52802	0.126508			0	0	0	2.02	3.74	0
ENSG00000273138			7	2.717	9.136	-1.58675	0.715871	-2.21653	0.0266549	0.0657687		2.13	0	6.02	10.08	8.72	8.6
ENSG00000286940		102725068	6	4.105	13.693	-1.58641	0.573418	-2.76658	0.00566473	0.0164436		4.26	5.64	2.41	10.08	19.93	11.06
ENSG00000235472	EIF4A1P7		13	0	1.576	-1.58625	1.03475	-1.53298	0.12528			0	0	0	1.01	2.49	1.23
ENSG00000147180	ZNF711	7552	X	67.126	202.107	-1.58555	0.198766	-7.97695	1.49991e-15	1.46604e-14		79.92	56.44	65.02	196.62	213.02	196.68
ENSG00000245748		100129931	4	0	1.497	-1.58502	1.03769	-1.52744	0.12665			0	0	0	2.02	1.25	1.23
ENSG00000236985			20	0	4.387	-1.58488	0.71643	-2.21218	0.0269539			0	0	0	2.02	6.23	4.92
ENSG00000113721	PDGFRB	5159	5	4.414	14.769	-1.58465	0.504307	-3.14223	0.00167667	0.00537776		6.39	5.64	1.2	12.1	18.69	13.52
ENSG00000233058	LINC00884		3	0.753	4.156	-1.58405	0.71053	-2.22939	0.0257883	0.0638913		0	2.26	0	5.04	3.74	3.69
ENSG00000175426	PCSK1	5122	5	5.647	17.936	-1.58379	0.40994	-3.86346	0.000111793	0.000432532		7.46	2.26	7.22	19.16	17.44	17.21
ENSG00000205086	C2orf91	400950	2	0.355	2.458	-1.58374	0.935257	-1.69338	0.0903841	0.187556		1.07	0	0	0	0	7.38
ENSG00000115008	IL1A	3552	2	8.44	26.075	-1.58355	0.367607	-4.30774	1.64931e-05	7.05e-05		3.2	11.29	10.84	26.22	28.65	23.36
ENSG00000240023			14	0.778	3.562	-1.58125	1.00304	-1.57646	0.114919	0.228325		0	1.13	1.2	2.02	4.98	3.69
ENSG00000131620	ANO1	55107	11	32.095	96.651	-1.58075	0.202807	-7.79438	6.47257e-15	6.121e-14		29.84	32.74	33.71	95.79	88.45	105.71
ENSG00000268879	IGFL1P1		19	2.312	7.871	-1.57949	0.815971	-1.93572	0.0529021	0.119416		1.07	2.26	3.61	5.04	9.97	8.6
ENSG00000281406	BLACAT1		1	1.087	4.992	-1.57925	0.672931	-2.34683	0.0189341	0.0486477		2.13	1.13	0	5.04	7.47	2.46
ENSG00000162840	MT2P1		4	14.287	43.83	-1.57921	0.384145	-4.11098	3.93984e-05	0.000161014		17.05	10.16	15.65	47.39	38.62	45.48
ENSG00000154721	JAM2	58494	21	0	1.424	-1.57916	0.955188	-1.65325	0.0982805	0.201077		0	0	0	3.02	1.25	0
ENSG00000230311	TOMM20P4		X	0	1.418	-1.57878	1.02769	-1.53624	0.124481			0	0	0	3.02	0	1.23
ENSG00000223617	LINC00370		13	1.158	4.56	-1.57851	0.989972	-1.5945	0.110824	0.221898		1.07	0	2.41	5.04	2.49	6.15
ENSG00000069764	PLA2G10	8399	16	0.376	2.401	-1.5766	0.92154	-1.71083	0.0871116	0.181985		0	1.13	0	1.01	3.74	2.46
ENSG00000139194	RBP5	83758	12	0.401	2.249	-1.57636	1.01949	-1.54622	0.122052	0.239974		0	0	1.2	3.02	2.49	1.23
ENSG00000181885	CLDN7	1366	17	21.491	63.709	-1.57577	0.222015	-7.09757	1.2697e-12	1.0273e-11		11.72	21.45	31.3	73.61	56.06	61.46
ENSG00000184908	CLCNKB	1188	1	1.179	4.986	-1.57571	0.709347	-2.22136	0.0263267	0.065095		0	1.13	2.41	5.04	6.23	3.69
ENSG00000203688	LINC02487	441178	6	0.376	2.726	-1.57475	1.03968	-1.51464	0.129863			0	1.13	0	2.02	1.25	4.92
ENSG00000187634	SAMD11	148398	1	435.2	1299.5	-1.57431	0.121261	-12.9828	1.53183e-38	3.89375e-37		435.84	390.57	479.19	1329.98	1347.88	1220.63
ENSG00000237980	LINC02773		1	2.241	7.792	-1.57349	0.735604	-2.13905	0.032432	0.0782146		2.13	3.39	1.2	6.05	8.72	8.6
ENSG00000187094	CCK	885	3	31.53	95.018	-1.57344	0.296251	-5.31117	1.08921e-07	5.88149e-07		33.03	33.86	27.69	101.84	97.17	86.05
ENSG00000189045	ANKDD1B	728780	5	0.731	3.514	-1.57269	0.789962	-1.99084	0.0464981	0.106701		1.07	1.13	0	8.07	1.25	1.23
ENSG00000231969	MMADHC-DT		2	0.778	3.825	-1.5725	0.829731	-1.89519	0.0580667	0.129585		0	1.13	1.2	4.03	4.98	2.46
ENSG00000251411			4	2.287	7.975	-1.57205	0.660463	-2.38022	0.0173024	0.0448888		1.07	3.39	2.41	9.07	7.47	7.38
ENSG00000163357	DCST1	149095	1	0	1.582	-1.57197	1.03535	-1.5183	0.128938	0.2511		0	0	0	1.01	3.74	0
ENSG00000286303			12	1.108	4.707	-1.5709	0.958489	-1.63894	0.101226	0.205963		1.07	2.26	0	3.02	2.49	8.6
ENSG00000162520	SYNC	81493	1	234.83	699.87	-1.57058	0.101132	-15.53	2.17374e-54	8.68022e-53		256.82	220.12	227.55	687.68	707.58	704.35
ENSG00000014914	MTMR11	10903	1	519.548	1548.35	-1.57037	0.125994	-12.4638	1.17647e-35	2.74186e-34		506.17	503.45	549.02	1608.28	1619.45	1417.31
ENSG00000133477	FAM83F	113828	22	0	2.407	-1.57011	1.006	-1.56075	0.118582			0	0	0	1.01	4.98	1.23
ENSG00000233448	PMS2P9		7	0.803	3.557	-1.56903	0.994039	-1.57844	0.114465	0.227642		0	0	2.41	2.02	3.74	4.92
ENSG00000238113	LINC01410	103352539	9	2.223	7.718	-1.56853	0.681314	-2.30221	0.0213235	0.0539968		4.26	0	2.41	7.06	8.72	7.38
ENSG00000235481	UBE2R2-AS1		9	0.778	3.62	-1.56818	0.903714	-1.73526	0.082695	0.174392		0	1.13	1.2	1.01	1.25	8.6
ENSG00000171223	JUNB	3726	19	2655.63	7877.63	-1.56802	0.054715	-28.658	1.2749e-180	2.44682e-178		2588.41	2617.72	2760.76	7944.6	8039.97	7648.33
ENSG00000127152	BCL11B	64919	14	35.047	104.258	-1.56761	0.300703	-5.21314	1.85671e-07	9.81809e-07		27.71	30.48	46.96	109.91	95.92	106.94
ENSG00000266850		101927571	18	0.71	3.483	-1.56737	0.909414	-1.7235	0.0847984	0.178024		2.13	0	0	3.02	3.74	3.69
ENSG00000237786	GFOD1-AS1		6	0	1.497	-1.56724	1.03336	-1.51665	0.129356	0.251599		0	0	0	2.02	1.25	1.23
ENSG00000268104	SLC6A14	11254	X	13.535	40.984	-1.56722	0.475256	-3.29763	0.000975057	0.00325343		17.05	7.9	15.65	47.39	43.6	31.96
ENSG00000179388	EGR3	1960	8	7.841	24.419	-1.56648	0.432554	-3.62146	0.000292943	0.00106126		10.66	5.64	7.22	26.22	24.91	22.13
ENSG00000059378	PARP12	64761	7	3697.03	10955.8	-1.56627	0.0426103	-36.7579	8.67907e-296	3.90684e-293		3683.87	3937.3	3469.91	10880.8	10973.7	11012.8
ENSG00000218052	ADAMTS7P4		15	8.348	25.69	-1.56608	0.461356	-3.39451	0.000687525	0.00235075		5.33	11.29	8.43	31.26	24.91	20.9
ENSG00000112343	TRIM38	10475	6	1332.98	3951.03	-1.56591	0.0602336	-25.9974	5.30419e-149	8.05651e-147		1402.36	1326.35	1270.21	3991.96	3909.11	3952
ENSG00000234840	LINC01239	441389	9	4.649	14.348	-1.56591	0.491489	-3.18605	0.0014423	0.00467938		2.13	3.39	8.43	12.1	16.19	14.75
ENSG00000142677	IL22RA1	58985	1	384.442	1141.37	-1.5652	0.0912071	-17.1609	5.20965e-66	2.75599e-64		418.79	396.21	338.32	1142.43	1128.64	1153.03
ENSG00000138755	CXCL9	4283	4	0.401	2.396	-1.56493	1.01929	-1.53531	0.124708	0.244189		0	0	1.2	1.01	2.49	3.69
ENSG00000267446			17	0.71	3.557	-1.56482	0.895602	-1.74722	0.0805985	0.170786		2.13	0	0	2.02	3.74	4.92
ENSG00000204802			9	2.291	8.286	-1.56425	0.693806	-2.25459	0.0241592	0.0602895		2.13	1.13	3.61	5.04	11.21	8.6
ENSG00000244468			3	9.464	28.937	-1.56406	0.372176	-4.20247	2.64021e-05	0.000110323		8.53	9.03	10.84	26.22	27.41	33.19
ENSG00000167165	UGT1A6	54578	2	14.709	43.682	-1.56405	0.403661	-3.87465	0.000106776	0.000413703		15.98	11.29	16.86	60.5	36.13	34.42
ENSG00000288617			14	0	1.418	-1.5636	1.02885	-1.51975	0.128573	0.250509		0	0	0	3.02	0	1.23
ENSG00000135218	CD36	948	7	2.283	7.907	-1.56355	0.723239	-2.16187	0.0306281	0.0744151		0	5.64	1.2	10.08	8.72	4.92
ENSG00000176170	SPHK1	8877	17	426.994	1263.79	-1.56226	0.0974061	-16.0386	6.86553e-58	3.00312e-56		408.13	470.71	402.13	1300.74	1314.25	1176.38
ENSG00000104967	NOVA2	4858	19	6.906	21.383	-1.56216	0.526116	-2.96923	0.00298547	0.00915573		2.13	10.16	8.43	17.14	22.42	24.58
ENSG00000112053	SLC26A8	116369	6	0.376	2.243	-1.56156	1.0081	-1.54901	0.121379			0	1.13	0	3.02	1.25	2.46
ENSG00000224289	IFIT6P		10	8.515	26.773	-1.56081	0.68654	-2.27345	0.022999	0.0577474		9.59	13.55	2.41	22.18	27.41	30.73
ENSG00000229109			9	0.355	2.249	-1.55902	0.909684	-1.7138	0.0865656	0.180967		1.07	0	0	3.02	2.49	1.23
ENSG00000100170	SLC5A1	6523	22	0.71	3.404	-1.55879	1.03062	-1.51247	0.130414			2.13	0	0	4.03	2.49	3.69
ENSG00000284237	LINC02767		1	0.376	2.401	-1.55829	0.967571	-1.61052	0.107284	0.216		0	1.13	0	1.01	3.74	2.46
ENSG00000197208	SLC22A4	6583	5	127.501	377.008	-1.55822	0.133769	-11.6485	2.3343e-31	4.71776e-30		125.74	121.91	134.85	358.96	378.7	393.36
ENSG00000231233	CFAP58-DT		10	1.906	6.819	-1.55753	0.668351	-2.3304	0.0197851	0.0505964		0	4.52	1.2	8.07	7.47	4.92
ENSG00000266261			17	0	1.492	-1.55653	1.03868	-1.49857	0.133986			0	0	0	2.02	0	2.46
ENSG00000174015	CBY2	220082	13	0.803	3.489	-1.55639	1.01532	-1.53291	0.125298			0	0	2.41	3.02	4.98	2.46
ENSG00000169306	IL1RAPL1	11141	X	0	1.418	-1.55569	0.923804	-1.684	0.0921813	0.190726		0	0	0	3.02	0	1.23
ENSG00000197329	PELI1	57162	2	42.842	127.744	-1.55542	0.170643	-9.11504	7.86405e-20	9.86313e-19		39.43	54.18	34.92	127.05	130.8	125.38
ENSG00000271947			2	0.376	2.169	-1.55538	0.997534	-1.55923	0.118942	0.23498		0	1.13	0	4.03	1.25	1.23
ENSG00000231346	LINC01160		1	0.376	3.305	-1.55411	0.764677	-2.03238	0.0421157	0.0980773		0	1.13	0	0	6.23	3.69
ENSG00000250120	PCDHA10	56139	5	1.86	6.814	-1.55402	0.608092	-2.55556	0.0106016	0.0289643		1.07	4.52	0	8.07	6.23	6.15
ENSG00000164691	TAGAP	117289	6	0.778	4.754	-1.55401	0.971331	-1.59987	0.109627			0	1.13	1.2	8.07	3.74	2.46
ENSG00000186204	CYP4F12	66002	19	95.063	280.648	-1.55368	0.204134	-7.61112	2.71739e-14	2.47889e-13		91.64	76.76	116.79	298.46	290.26	253.22
ENSG00000260107			16	0	2.169	-1.55358	1.01579	-1.52943	0.126158			0	0	0	4.03	1.25	1.23
ENSG00000161896	IP6K3	117283	6	2.266	7.486	-1.5535	0.692973	-2.24179	0.024975	0.0620939		2.13	2.26	2.41	10.08	6.23	6.15
ENSG00000189320	FAM180A	389558	7	0	1.918	-1.55326	1.03847	-1.49572	0.134727			0	0	0	2.02	3.74	0
ENSG00000229563	LINC01204	101927528	X	2.152	7.797	-1.55235	0.646177	-2.40236	0.0162895	0.042582		5.33	1.13	0	6.05	9.97	7.38
ENSG00000083097	DOP1A	23033	6	281.53	827.867	-1.55189	0.0986959	-15.724	1.03654e-55	4.28427e-54		301.57	270.91	272.1	836.91	798.52	848.18
ENSG00000285881			8	0	1.571	-1.55171	0.935759	-1.65824	0.0972691	0.199384		0	0	0	1.01	1.25	2.46
ENSG00000244604			17	0.355	2.311	-1.55141	1.01516	-1.52824	0.126453			1.07	0	0	2.02	0	4.92
ENSG00000280309			15	0.401	2.317	-1.55118	0.978617	-1.58507	0.112951	0.225246		0	0	1.2	2.02	1.25	3.69
ENSG00000239593			9	0	1.418	-1.55054	1.01905	-1.52155	0.128123	0.24973		0	0	0	3.02	0	1.23
ENSG00000141194	OR4D1	26689	17	0.401	2.317	-1.54976	1.03244	-1.50106	0.13334			0	0	1.2	2.02	1.25	3.69
ENSG00000186094	AGBL4	84871	1	0.376	2.811	-1.54921	0.841548	-1.84091	0.0656349	0.143639		0	1.13	0	1.01	3.74	3.69
ENSG00000100226	GTPBP1	9567	22	1284.24	3757.12	-1.54917	0.0459817	-33.6909	7.85585e-249	2.59327e-246		1218.01	1313.94	1320.78	3764.08	3737.2	3770.08
ENSG00000044012	GUCA2B	2981	1	1.112	4.382	-1.5491	0.960389	-1.61299	0.106747	0.215163		2.13	0	1.2	2.02	4.98	6.15
ENSG00000162946	DISC1	27185	1	47.741	141.134	-1.54873	0.188462	-8.21773	2.07385e-16	2.16096e-15		47.95	51.93	43.34	140.16	132.05	151.2
ENSG00000198569	SLC34A3	142680	9	0.355	2.658	-1.5486	0.819805	-1.88899	0.0588935	0.131099		1.07	0	0	3.02	2.49	2.46
ENSG00000143167	GPA33	10223	1	0	1.576	-1.54852	0.919823	-1.6835	0.0922785	0.190863		0	0	0	1.01	2.49	1.23
ENSG00000135547	HEY2	23493	6	2.219	7.565	-1.54823	0.738424	-2.09666	0.0360233	0.085679		3.2	2.26	1.2	9.07	7.47	6.15
ENSG00000214121	PRDX1P1		9	0.355	2.243	-1.54814	0.904927	-1.71079	0.0871197	0.181985		1.07	0	0	3.02	1.25	2.46
ENSG00000085563	ABCB1	5243	7	0	1.492	-1.54764	1.03681	-1.49269	0.135519	0.261084		0	0	0	2.02	0	2.46
ENSG00000234394		440896	9	0.401	4.046	-1.54682	0.953481	-1.62228	0.104743			0	0	1.2	1.01	4.98	6.15
ENSG00000166165	CKB	1152	14	1184.16	3461.78	-1.54662	0.0669207	-23.1113	3.5651e-118	3.87126e-116		1107.19	1193.15	1252.15	3410.16	3470.62	3504.56
ENSG00000238072	CDC26P1		7	0.355	2.39	-1.5441	0.883686	-1.74734	0.0805786	0.170758		1.07	0	0	1.01	1.25	4.92
ENSG00000246877	DNM1P35		15	4.155	13.237	-1.54401	0.586937	-2.63062	0.00852299	0.0238055		4.26	3.39	4.82	21.17	7.47	11.06
ENSG00000131398	KCNC3	3748	19	37.922	112.683	-1.54376	0.208432	-7.40651	1.29662e-13	1.13154e-12		38.36	42.89	32.51	113.94	122.08	102.03
ENSG00000173557	FAM166C	339778	2	7.884	23.499	-1.5433	0.474148	-3.2549	0.00113433	0.003743		8.53	7.9	7.22	27.22	18.69	24.58
ENSG00000155324	GRAMD2B	65983	5	50.804	150.008	-1.5433	0.155493	-9.92515	3.23601e-23	4.71832e-22		55.41	44.02	52.98	144.19	166.93	138.9
ENSG00000162849	KIF26B	55083	1	4.51	14.043	-1.5428	0.497964	-3.09822	0.00194684	0.00616839		5.33	3.39	4.82	16.13	13.7	12.29
ENSG00000075290	WNT8B	7479	10	0.355	2.254	-1.54206	0.944859	-1.63206	0.102667	0.208365		1.07	0	0	3.02	3.74	0
ENSG00000153902	LGI4	163175	19	3.001	10.119	-1.54132	0.540793	-2.85012	0.00437034	0.0129691		4.26	1.13	3.61	8.07	12.46	9.83
ENSG00000154783	FGD5	152273	3	0.355	3.164	-1.54118	1.03173	-1.49378	0.135234			1.07	0	0	2.02	7.47	0
ENSG00000092929	UNC13D	201294	17	197.665	578.214	-1.54096	0.0922301	-16.7078	1.15084e-62	5.66451e-61		186.48	205.44	201.07	530.38	620.38	583.89
ENSG00000278177			13	2.241	7.933	-1.54082	0.756793	-2.03599	0.0417519	0.0973253		2.13	3.39	1.2	4.03	7.47	12.29
ENSG00000186118	TEX38	374973	1	0	1.582	-1.5407	1.02559	-1.50225	0.133032	0.257233		0	0	0	1.01	3.74	0
ENSG00000008517	IL32	9235	16	69.407	202.371	-1.53998	0.14304	-10.7661	4.97822e-27	8.54129e-26		66.07	71.12	71.04	208.72	194.33	204.05
ENSG00000082269	FAM135A	57579	6	742.044	2159.57	-1.53922	0.0689434	-22.3258	2.07405e-110	2.05397e-108		771.51	720.18	734.44	2162.86	2135.19	2180.67
ENSG00000168421	RHOH	399	4	6.455	20.154	-1.53907	0.598974	-2.56951	0.0101843	0.0279289		2.13	12.42	4.82	17.14	22.42	20.9
ENSG00000002549	LAP3	51056	4	5135.61	14936.1	-1.53903	0.0465763	-33.0431	1.95239e-239	5.96758e-237		5259.93	5428.46	4718.45	14842.5	14796.8	15168.8
ENSG00000279806			17	301.759	878.535	-1.53877	0.0980164	-15.6991	1.53466e-55	6.3115e-54		311.16	299.14	294.98	873.21	903.16	859.24
ENSG00000258343		105369921	12	28.95	85.136	-1.53807	0.250222	-6.14684	7.90402e-10	5.18653e-09		34.1	21.45	31.3	84.7	80.97	89.73
ENSG00000179761	PIPOX	51268	17	0.71	3.667	-1.53674	0.762592	-2.01515	0.0438889	0.101628		2.13	0	0	6.05	2.49	2.46
ENSG00000108468	CBX1	10951	17	1750.9	5078.75	-1.53599	0.0414974	-37.0141	6.80553e-300	3.12021e-297		1759.35	1709.02	1784.32	5082.97	5087.58	5065.69
ENSG00000157103	SLC6A1	6529	3	0	2.317	-1.53456	1.00455	-1.52761	0.126609			0	0	0	2.02	1.25	3.69
ENSG00000214456	PLIN5	440503	19	1.488	5.975	-1.53448	0.787522	-1.94849	0.0513563	0.116265		2.13	1.13	1.2	3.02	11.21	3.69
ENSG00000164929	BAALC	79870	8	0	2.175	-1.53438	1.0186	-1.50636	0.131974			0	0	0	4.03	2.49	0
ENSG00000187105	HEATR4	399671	14	3.491	10.707	-1.53409	0.595138	-2.57771	0.00994585	0.0273265		1.07	3.39	6.02	11.09	9.97	11.06
ENSG00000250447	LINC02105	105378966	5	0.355	2.469	-1.53384	1.02427	-1.49749	0.134265	0.259152		1.07	0	0	0	2.49	4.92
ENSG00000166341	DCHS1	8642	11	21.143	62.077	-1.5334	0.308525	-4.97009	6.69203e-07	3.33296e-06		19.18	22.58	21.67	62.52	59.8	63.92
ENSG00000125430	HS3ST3B1	9953	17	17.66	51.97	-1.53261	0.337595	-4.53977	5.6316e-06	2.53781e-05		20.25	14.67	18.06	60.5	57.3	38.11
ENSG00000130528	HRC	3270	19	0.71	3.415	-1.5324	0.896973	-1.70841	0.0875598	0.182644		2.13	0	0	4.03	4.98	1.23
ENSG00000274225			21	2.312	8.275	-1.53182	0.968576	-1.58151	0.11376	0.226587		1.07	2.26	3.61	5.04	8.72	11.06
ENSG00000261386			16	0	1.497	-1.53181	0.965205	-1.58703	0.112505	0.224502		0	0	0	2.02	1.25	1.23
ENSG00000183484	GPR132	29933	14	9.205	27.345	-1.53037	0.438949	-3.48644	0.000489491	0.00171339		6.39	6.77	14.45	31.26	28.65	22.13
ENSG00000222033	LINC01124	440925	2	1.534	5.642	-1.52934	0.672291	-2.27482	0.0229165	0.057554		1.07	1.13	2.41	7.06	2.49	7.38
ENSG00000171747	LGALS4	3960	19	7.667	22.854	-1.52902	0.472843	-3.23367	0.00122211	0.0040134		4.26	7.9	10.84	25.21	24.91	18.44
ENSG00000143507	DUSP10	11221	1	102.018	294.753	-1.52896	0.123239	-12.4065	2.41084e-35	5.55749e-34		106.56	95.95	103.54	317.62	275.31	291.33
ENSG00000271579			12	2.262	7.876	-1.52837	0.949688	-1.60934	0.107542	0.216449		1.07	4.52	1.2	5.04	11.21	7.38
ENSG00000277196		102724788	KI270734.1	13.548	39.659	-1.52734	0.332976	-4.58692	4.49835e-06	2.05366e-05		13.85	13.55	13.24	48.4	38.62	31.96
ENSG00000283538			17	0.71	3.489	-1.52673	0.852065	-1.7918	0.0731644	0.157692		2.13	0	0	3.02	4.98	2.46
ENSG00000100253	MIOX	55586	22	0	1.503	-1.52649	0.979649	-1.5582	0.119186	0.235337		0	0	0	2.02	2.49	0
ENSG00000131094	C1QL1	10882	17	492.206	1424.15	-1.52608	0.140599	-10.8541	1.90606e-27	3.31159e-26		512.57	493.29	470.76	1417.71	1427.61	1427.15
ENSG00000115956	PLEK	5341	2	0	3.068	-1.52526	0.931801	-1.6369	0.101652			0	0	0	3.02	2.49	3.69
ENSG00000039600	SOX30	11063	5	0.803	3.562	-1.52524	0.805895	-1.89261	0.0584097	0.130232		0	0	2.41	2.02	4.98	3.69
ENSG00000101443	WFDC2	10406	20	1.108	4.901	-1.52382	0.662846	-2.2989	0.0215105	0.0544037		1.07	2.26	0	6.05	3.74	4.92
ENSG00000215483				1.839	6.63	-1.52343	0.724882	-2.10163	0.0355858	0.0847964		2.13	3.39	0	5.04	7.47	7.38
ENSG00000278389			16	1.442	5.721	-1.52314	0.679208	-2.24252	0.0249277	0.0620011		3.2	1.13	0	6.05	3.74	7.38
ENSG00000067445	TRO	7216	X	21.214	61.301	-1.52234	0.348255	-4.37134	1.23489e-05	5.3398e-05		18.12	21.45	24.08	56.47	62.29	65.15
ENSG00000162771	FAM71A	149647	1	0.376	2.317	-1.52204	1.03593	-1.46925	0.141765			0	1.13	0	2.02	1.25	3.69
ENSG00000183246	RIMBP3C	150221	22	1.108	4.472	-1.52108	0.894286	-1.70089	0.0889637	0.185058		1.07	2.26	0	1.01	8.72	3.69
ENSG00000169783	LINGO1	84894	15	338.881	972.993	-1.52095	0.106353	-14.3009	2.16094e-46	7.0303e-45		323.95	355.58	337.12	962.95	951.74	1004.29
ENSG00000172345	STARD5	80765	15	66.887	193.446	-1.52093	0.218053	-6.97502	3.05835e-12	2.403e-11		56.48	76.76	67.42	207.72	198.07	174.55
ENSG00000268266			19	0	1.655	-1.52082	0.928076	-1.63868	0.101279	0.206037		0	0	0	0	3.74	1.23
ENSG00000260807	CEROX1	115804232	16	11.604	34.491	-1.52081	0.457307	-3.32558	0.000882347	0.00295884		10.66	16.93	7.22	29.24	36.13	38.11
ENSG00000259113			14	0.401	2.328	-1.52039	1.04005	-1.46184	0.143786			0	0	1.2	2.02	3.74	1.23
ENSG00000225595	LINC01623		6	1.112	4.314	-1.5202	0.884374	-1.71896	0.0856224	0.179389		2.13	0	1.2	3.02	6.23	3.69
ENSG00000144550	CPNE9	151835	3	1.463	5.469	-1.51793	0.781209	-1.94305	0.0520106	0.117585		2.13	2.26	0	4.03	6.23	6.15
ENSG00000106772	PRUNE2	158471	9	1.087	4.901	-1.51762	0.670884	-2.26212	0.0236901	0.0592504		2.13	1.13	0	6.05	3.74	4.92
ENSG00000259727			15	13.48	39.708	-1.517	0.345195	-4.39461	1.10971e-05	4.82765e-05		15.98	12.42	12.04	42.35	42.35	34.42
ENSG00000204965	PCDHA5	56143	5	51.581	148.81	-1.51692	0.196156	-7.73324	1.04847e-14	9.81772e-14		61.81	50.8	42.14	159.32	145.75	141.36
ENSG00000218416		100130449	2	1.509	5.39	-1.51689	0.729935	-2.07812	0.0376986	0.0892297		1.07	2.26	1.2	5.04	4.98	6.15
ENSG00000279476			16	0	1.661	-1.51591	1.03946	-1.45837	0.144738	0.275703		0	0	0	0	4.98	0
ENSG00000159708	LRRC36	55282	16	4.46	13.816	-1.51558	0.527962	-2.87062	0.0040967	0.0122201		5.33	5.64	2.41	19.16	12.46	9.83
ENSG00000113205	PCDHB3	56132	5	1.158	4.344	-1.51448	0.811534	-1.8662	0.062014	0.13695		1.07	0	2.41	8.07	3.74	1.23
ENSG00000226891	LINC01359		1	0.376	2.333	-1.51364	0.942145	-1.60659	0.108145	0.21741		0	1.13	0	2.02	4.98	0
ENSG00000247317	LY6E-DT		8	21.711	63.059	-1.51266	0.265803	-5.69092	1.26354e-08	7.46782e-08		23.44	24.83	16.86	71.59	61.04	56.55
ENSG00000187902	SHISA7	729956	19	0.401	2.328	-1.51221	1.01218	-1.49401	0.135173	0.260599		0	0	1.2	2.02	3.74	1.23
ENSG00000234477			17	1.158	4.56	-1.51146	0.871751	-1.73383	0.082949	0.174734		1.07	0	2.41	5.04	2.49	6.15
ENSG00000241469	LINC00635	151658	3	0.355	2.901	-1.51113	1.03991	-1.45312	0.146189			1.07	0	0	0	7.47	1.23
ENSG00000261737		105378828	1	4.836	15.198	-1.51085	0.453992	-3.32792	0.000874967	0.00293648		5.33	6.77	2.41	17.14	13.7	14.75
ENSG00000121797	CCRL2	9034	3	6.801	20.086	-1.51055	0.425594	-3.54928	0.000386279	0.00137486		7.46	4.52	8.43	18.15	23.67	18.44
ENSG00000260454			9	0	1.582	-1.51034	1.03501	-1.45926	0.144494	0.275366		0	0	0	1.01	3.74	0
ENSG00000124232	RBPJL	11317	20	0	3.678	-1.51014	0.786342	-1.92046	0.0548			0	0	0	6.05	4.98	0
ENSG00000272814			2	1.112	4.398	-1.50902	0.851415	-1.77236	0.0763344	0.163245		2.13	0	1.2	2.02	8.72	2.46
ENSG00000233820			9	0	1.582	-1.50884	0.917198	-1.64505	0.0999591	0.203921		0	0	0	1.01	3.74	0
ENSG00000270210			2	3.398	10.676	-1.50832	0.69592	-2.16738	0.030206	0.0735032		3.2	3.39	3.61	6.05	12.46	13.52
ENSG00000228917	NECTIN4-AS1		1	1.204	4.314	-1.50799	0.817008	-1.84575	0.0649288	0.142346		0	0	3.61	3.02	6.23	3.69
ENSG00000220161	LINC02076	400579	17	3.377	10.871	-1.50773	0.608495	-2.4778	0.0132195	0.0352985		4.26	2.26	3.61	9.07	13.7	9.83
ENSG00000106100	NOD1	10392	7	355.321	1012.54	-1.50756	0.0833379	-18.0897	3.83883e-73	2.2683e-71		346.33	366.86	352.77	967.99	1083.79	985.85
ENSG00000184343	SRPK3	26576	X	0	1.655	-1.50749	1.04054	-1.44876	0.147405			0	0	0	0	3.74	1.23
ENSG00000268001	CARD8-AS1	100505812	19	27.337	79.172	-1.50734	0.238701	-6.31476	2.70584e-10	1.83739e-09		31.97	25.96	24.08	81.67	72.25	83.59
ENSG00000135378	PRRG4	79056	11	63.399	181.968	-1.50728	0.165296	-9.11869	7.60393e-20	9.54172e-19		69.27	64.34	56.59	184.52	184.37	177.01
ENSG00000178573	MAF	4094	16	7.503	22.328	-1.50676	0.506848	-2.97281	0.00295089	0.0090654		7.46	9.03	6.02	15.12	17.44	34.42
ENSG00000177992	SPATA31E1	286234	9	0.753	3.557	-1.50673	1.03323	-1.45828	0.144764			0	2.26	0	2.02	3.74	4.92
ENSG00000258088			12	4.176	12.709	-1.50658	0.527913	-2.85385	0.00431935	0.0128285		3.2	4.52	4.82	12.1	16.19	9.83
ENSG00000264943	SH3GL1P2		17	2.316	7.576	-1.50534	0.819361	-1.83722	0.0661778	0.144597		2.13	0	4.82	9.07	9.97	3.69
ENSG00000172936	MYD88	4615	3	4716.67	13399.5	-1.50519	0.0493941	-30.473	5.93303e-204	1.3728e-201		4771.87	5040.15	4337.99	13342.2	13455.2	13401.2
ENSG00000273027			21	4.172	13.119	-1.50516	0.556369	-2.70534	0.00682352	0.0194762		2.13	6.77	3.61	12.1	16.19	11.06
ENSG00000053108	FSTL4	23105	5	76.157	217.718	-1.50465	0.180868	-8.31901	8.86991e-17	9.39671e-16		79.92	83.53	65.02	212.76	210.53	229.87
ENSG00000260552	COSMOC	101927809	18	27.489	79.035	-1.50434	0.248855	-6.04505	1.49359e-09	9.62977e-09		25.58	31.61	25.28	83.69	74.74	78.67
ENSG00000129757	CDKN1C	1028	11	5.376	16.665	-1.5043	0.428753	-3.50855	0.000450564	0.00158565		2.13	6.77	7.22	14.12	17.44	18.44
ENSG00000013374	NUB1	51667	7	2836.45	8050.26	-1.50365	0.0388374	-38.7165	0	0		2889.98	2923.62	2695.74	7954.68	7956.5	8239.59
ENSG00000112539	C6orf118	168090	6	3.377	10.8	-1.50348	0.798594	-1.88266	0.059747	0.132701		4.26	2.26	3.61	15.12	4.98	12.29
ENSG00000205403	CFI	3426	4	1.112	4.497	-1.50306	0.69113	-2.17478	0.0296463	0.0722638		2.13	0	1.2	6.05	4.98	2.46
ENSG00000165474	GJB2	2706	13	36.04	103.423	-1.50221	0.244972	-6.13215	8.66967e-10	5.66641e-09		38.36	37.25	32.51	98.82	94.68	116.78
ENSG00000232977	LINC00327	100506697	13	2.997	9.362	-1.50199	0.752236	-1.9967	0.0458576	0.105515		3.2	3.39	2.41	7.06	9.97	11.06
ENSG00000140937	CDH11	1009	16	0.376	2.732	-1.50166	0.797367	-1.88328	0.0596626	0.132561		0	1.13	0	2.02	2.49	3.69
ENSG00000174938	SEZ6L2	26470	16	808.371	2289.29	-1.50138	0.055035	-27.2804	7.24224e-164	1.25387e-161		792.83	782.27	850.02	2246.55	2274.71	2346.62
ENSG00000189223	PAX8-AS1	654433	2	60.697	173.975	-1.50072	0.16571	-9.05628	1.34974e-19	1.67045e-18		71.4	55.31	55.38	169.4	165.68	186.84
ENSG00000198910	L1CAM	3897	X	375.152	1064	-1.50071	0.0943194	-15.9109	5.32432e-57	2.28061e-55		416.66	348.8	359.99	1094.03	1087.53	1010.43
ENSG00000231925	TAPBP	6892	6	5073.4	14360.2	-1.50066	0.0351662	-42.6734	0	0		4934.91	5194.79	5090.49	14078.2	14545.2	14457.1
ENSG00000126353	CCR7	1236	17	32.287	91.846	-1.49933	0.282027	-5.31627	1.05915e-07	5.73041e-07		34.1	33.86	28.9	94.78	97.17	83.59
ENSG00000124440	HIF3A	64344	19	0.376	2.254	-1.49906	0.890736	-1.68294	0.0923867	0.191071		0	1.13	0	3.02	3.74	0
ENSG00000248713	C4orf54	285556	4	0.355	2.096	-1.49906	1.01902	-1.47107	0.141272	0.270295		1.07	0	0	5.04	1.25	0
ENSG00000287656			6	22.571	65.025	-1.49798	0.359285	-4.16933	3.05501e-05	0.000126651		31.97	23.71	12.04	61.51	61.04	72.53
ENSG00000259925			16	1.509	5.374	-1.49692	0.791295	-1.89173	0.0585264	0.130434		1.07	2.26	1.2	5.04	1.25	9.83
ENSG00000069493	CLEC2D	29121	12	39.967	113.316	-1.49691	0.226155	-6.61898	3.61692e-11	2.62834e-10		28.77	41.77	49.36	109.91	105.89	124.15
ENSG00000165376	CLDN2	9075	X	441.656	1245.99	-1.49594	0.112947	-13.2446	4.84616e-40	1.2985e-38		451.83	375.89	497.25	1342.08	1122.41	1273.49
ENSG00000069431	ABCC9	10060	12	1.776	6.546	-1.49573	0.661795	-2.26011	0.0238146	0.0595378		5.33	0	0	6.05	4.98	8.6
ENSG00000287031			5	0.401	2.396	-1.49523	0.97314	-1.5365	0.124415	0.243741		0	0	1.2	1.01	2.49	3.69
ENSG00000100784	RPS6KA5	9252	14	334.068	944.237	-1.49506	0.0999342	-14.9604	1.3319e-50	4.82092e-49		331.41	340.9	329.89	899.43	997.83	935.45
ENSG00000145335	SNCA	6622	4	5.334	15.619	-1.495	0.460538	-3.2462	0.00116958	0.00385365		4.26	4.52	7.22	17.14	16.19	13.52
ENSG00000154274	C4orf19	55286	4	0.355	2.401	-1.4937	0.853834	-1.7494	0.0802221	0.170046		1.07	0	0	1.01	3.74	2.46
ENSG00000233916	ZDHHC20P1		6	0	1.492	-1.49303	1.04289	-1.43164	0.152248			0	0	0	2.02	0	2.46
ENSG00000228705	LINC00659		20	0.376	2.317	-1.49253	0.876949	-1.70195	0.088764	0.18472		0	1.13	0	2.02	1.25	3.69
ENSG00000274600	RIMBP3B	440804	22	1.885	6.625	-1.49222	0.895643	-1.66609	0.095695	0.196795		1.07	3.39	1.2	5.04	6.23	8.6
ENSG00000259088			14	4.13	12.835	-1.49155	0.566614	-2.63239	0.00847858	0.0236895		4.26	4.52	3.61	10.08	11.21	17.21
ENSG00000270393			22	4.268	12.977	-1.48996	0.679815	-2.19171	0.0284004	0.0695486		1.07	4.52	7.22	14.12	17.44	7.38
ENSG00000278705	H4C2	8366	6	0.401	2.317	-1.48992	0.906692	-1.64325	0.100332	0.204462		0	0	1.2	2.02	1.25	3.69
ENSG00000159409	CELF3	11189	1	0.401	2.579	-1.48959	1.04131	-1.4305	0.152574			0	0	1.2	4.03	1.25	2.46
ENSG00000225465	RFPL1S		22	17.695	50.314	-1.48843	0.366419	-4.06211	4.86319e-05	0.000196833		15.98	21.45	15.65	54.45	46.09	50.4
ENSG00000279196			16	6.772	20.206	-1.48837	0.475261	-3.13169	0.001738	0.00555865		6.39	7.9	6.02	16.13	17.44	27.04
ENSG00000230303			9	0.731	3.399	-1.48828	0.864744	-1.72107	0.0852384	0.178751		1.07	1.13	0	4.03	1.25	4.92
ENSG00000133466	C1QTNF6	114904	22	996.218	2794.53	-1.48794	0.0587345	-25.3333	1.37366e-141	1.93234e-139		989.97	939.17	1059.51	2816.25	2792.94	2774.39
ENSG00000227885			6	3.754	12.089	-1.48709	0.534966	-2.77979	0.00543944	0.0158471		4.26	3.39	3.61	9.07	11.21	15.98
ENSG00000221598	MIR1249	100302149	22	0.376	2.748	-1.48703	1.03255	-1.44015	0.149825	0.283244		0	1.13	0	2.02	6.23	0
ENSG00000237330	RNF223	401934	1	3.754	12.179	-1.48697	0.472382	-3.1478	0.00164503	0.00528518		4.26	3.39	3.61	8.07	14.95	13.52
ENSG00000183150	GPR19	2842	12	47.929	135.667	-1.48675	0.189028	-7.86525	3.68362e-15	3.53348e-14		44.76	49.67	49.36	127.05	161.95	118.01
ENSG00000113140	SPARC	6678	5	346.914	972.518	-1.48558	0.0671551	-22.1216	1.95795e-108	1.86442e-106		338.87	326.23	375.65	935.73	950.5	1031.33
ENSG00000235643	LINC01647	101929181	1	0.401	2.322	-1.48556	0.897945	-1.6544	0.0980469	0.200731		0	0	1.2	2.02	2.49	2.46
ENSG00000148488	ST8SIA6	338596	10	2.219	7.224	-1.48554	0.71475	-2.07841	0.0376718	0.0891748		3.2	2.26	1.2	8.07	6.23	7.38
ENSG00000136696	IL36B	27177	2	0.401	2.412	-1.48526	1.03215	-1.43899	0.150153	0.283669		0	0	1.2	1.01	6.23	0
ENSG00000187955	COL14A1	7373	8	0.401	2.249	-1.48518	0.881059	-1.68568	0.0918577	0.190199		0	0	1.2	3.02	2.49	1.23
ENSG00000231290	APCDD1L-DT	149773	20	0.355	2.585	-1.48475	0.81514	-1.82147	0.0685361	0.149014		1.07	0	0	4.03	2.49	1.23
ENSG00000205592	MUC19	283463	12	2.955	9.518	-1.48377	0.851297	-1.74295	0.081342	0.172066		5.33	1.13	2.41	10.08	2.49	15.98
ENSG00000214629	RPSAP6		10	0.355	2.48	-1.48327	1.04029	-1.42582	0.153921			1.07	0	0	0	4.98	2.46
ENSG00000164484	TMEM200A	114801	6	0.757	4.461	-1.48302	1.02452	-1.44753	0.147748			1.07	0	1.2	1.01	6.23	6.15
ENSG00000179111	HES7	84667	17	109.914	308.688	-1.48287	0.150659	-9.84256	7.38076e-23	1.05994e-21		91.64	130.94	107.16	287.37	332.61	306.08
ENSG00000279356			16	1.087	4.376	-1.48277	0.812678	-1.82454	0.06807	0.14813		2.13	1.13	0	2.02	3.74	7.38
ENSG00000251391			5	0.401	2.585	-1.48274	1.04137	-1.42384	0.154494			0	0	1.2	4.03	2.49	1.23
ENSG00000263680			17	2.951	9.24	-1.48271	0.66833	-2.21853	0.0265187	0.0654913		4.26	3.39	1.2	14.12	6.23	7.38
ENSG00000170075	GPR37L1	9283	1	18.953	53.998	-1.48224	0.328156	-4.51687	6.27609e-06	2.81186e-05		17.05	16.93	22.88	49.41	54.81	57.77
ENSG00000131849	ZNF132	7691	19	8.974	26.64	-1.48126	0.330167	-4.48639	7.24385e-06	3.22618e-05		11.72	6.77	8.43	29.24	21.18	29.5
ENSG00000261534			9	13.707	39.199	-1.48094	0.283447	-5.22474	1.74402e-07	9.23602e-07		9.59	14.67	16.86	38.32	46.09	33.19
ENSG00000120549	KIAA1217	56243	10	951.56	2661.27	-1.48031	0.098724	-14.9944	7.985e-51	2.90724e-49		973.98	975.29	905.4	2672.06	2522.61	2789.14
ENSG00000255094			11	0	1.571	-1.48023	1.04212	-1.4204	0.155492			0	0	0	1.01	1.25	2.46
ENSG00000125618	PAX8	7849	2	36.853	103.225	-1.47985	0.215001	-6.88299	5.86091e-12	4.52461e-11		27.71	39.51	43.34	107.89	107.13	94.65
ENSG00000007908	SELE	6401	1	0.376	2.407	-1.47971	1.04183	-1.4203	0.155519			0	1.13	0	1.01	4.98	1.23
ENSG00000164674	SYTL3	94120	6	52.147	146.05	-1.47955	0.171415	-8.63139	6.06085e-18	6.88324e-17		45.82	56.44	54.18	147.22	155.72	135.22
ENSG00000278915			5	6.158	17.594	-1.47874	0.472327	-3.13076	0.00174354	0.00557491		3.2	5.64	9.63	18.15	16.19	18.44
ENSG00000120278	PLEKHG1	57480	6	8.615	25.184	-1.47812	0.356781	-4.14293	3.42896e-05	0.000141161		9.59	9.03	7.22	22.18	38.62	14.75
ENSG00000286451			9	8.594	24.976	-1.47798	0.360759	-4.09686	4.188e-05	0.000170706		10.66	7.9	7.22	24.2	24.91	25.81
ENSG00000177614	PGBD5	79605	1	6.421	18.944	-1.47752	0.584412	-2.52823	0.0114641	0.0310737		6.39	5.64	7.22	22.18	17.44	17.21
ENSG00000162738	VANGL2	57216	1	250.672	699.304	-1.47718	0.118133	-12.5044	7.06365e-36	1.65765e-34		273.87	232.54	245.61	711.88	701.35	684.69
ENSG00000168065	SLC22A11	55867	11	5.246	15.661	-1.47699	0.738069	-2.00115	0.0453761	0.104592		7.46	2.26	6.02	22.18	16.19	8.6
ENSG00000268686		101928295	19	6.409	19.354	-1.47616	0.38263	-3.85793	0.000114349	0.000442009		3.2	12.42	3.61	22.18	17.44	18.44
ENSG00000263935	TOMM20P3		18	0.401	3.404	-1.47494	0.991661	-1.48735	0.136923			0	0	1.2	4.03	2.49	3.69
ENSG00000203814	H2BC18	440689	1	12.206	34.512	-1.47412	0.365236	-4.03607	5.43547e-05	0.00021846		10.66	7.9	18.06	40.33	38.62	24.58
ENSG00000185101	ANO9	338440	11	42.237	119.228	-1.47389	0.252605	-5.83477	5.38654e-09	3.29936e-08		58.61	25.96	42.14	137.13	132.05	88.51
ENSG00000183801	OLFML1	283298	11	2.713	8.06	-1.4735	0.604907	-2.43591	0.0148544	0.0392073		1.07	2.26	4.82	8.07	9.97	6.15
ENSG00000133101	CCNA1	8900	13	2.287	7.36	-1.47339	0.596351	-2.47067	0.013486	0.0359444		1.07	3.39	2.41	6.05	3.74	12.29
ENSG00000132141	CCT6B	10693	17	31.568	89.084	-1.4733	0.287985	-5.11589	3.12258e-07	1.61531e-06		29.84	38.38	26.49	87.72	97.17	82.36
ENSG00000214042	IFNA7	3444	9	0	32.491	-1.47258	0.663636	-2.21896	0.0264897	0.0654393		0	0	0	23.19	39.86	34.42
ENSG00000148408	CACNA1B	774	9	7.6	22.252	-1.47257	0.567542	-2.59465	0.00946876	0.0261346		6.39	6.77	9.63	17.14	33.63	15.98
ENSG00000169218	RSPO1	284654	1	3.068	9.504	-1.4708	0.770291	-1.9094	0.05621	0.125944		2.13	2.26	4.82	5.04	8.72	14.75
ENSG00000260693			15	0.753	3.642	-1.47069	1.02656	-1.43263	0.151962	0.286432		0	2.26	0	1.01	6.23	3.69
ENSG00000286698			2	2.308	7.297	-1.47013	0.633416	-2.32095	0.0202893	0.0517272		0	4.52	2.41	7.06	6.23	8.6
ENSG00000196352	CD55	1604	1	2755.33	7637.84	-1.47008	0.0519904	-28.2759	6.84027e-176	1.27332e-173		2824.97	2871.7	2569.32	8178.53	7434.54	7300.45
ENSG00000162461	SLC25A34	284723	1	4.645	13.871	-1.46894	0.523602	-2.80545	0.00502468	0.0147307		1.07	5.64	7.22	13.11	17.44	11.06
ENSG00000188897		400499	16	19.734	55.19	-1.4675	0.26374	-5.5642	2.63357e-08	1.51316e-07		18.12	15.8	25.28	55.46	53.57	56.55
ENSG00000254852	NPIPA2	642799	16	0	1.912	-1.46717	1.03822	-1.41316	0.157609			0	0	0	2.02	2.49	1.23
ENSG00000223476	VN1R42P		7	1.133	4.24	-1.46647	0.861079	-1.70305	0.0885579	0.184431		1.07	1.13	1.2	4.03	6.23	2.46
ENSG00000112139	MDGA1	266727	6	404.127	1117.58	-1.46629	0.0951621	-15.4083	1.43975e-53	5.64008e-52		370.84	434.59	406.95	1121.26	1146.08	1085.42
ENSG00000233117	LINC00702		10	0	1.833	-1.46577	0.845237	-1.73415	0.0828916	0.174688		0	0	0	3.02	1.25	1.23
ENSG00000253159	PCDHGA12	26025	5	0.376	2.658	-1.4652	0.79152	-1.85112	0.0641528	0.140856		0	1.13	0	3.02	2.49	2.46
ENSG00000255366			8	2.241	7.709	-1.46515	0.696102	-2.10479	0.0353098	0.0841952		2.13	3.39	1.2	2.02	16.19	4.92
ENSG00000162998	FRZB	2487	2	0.355	2.328	-1.46501	0.928823	-1.57728	0.114731	0.228026		1.07	0	0	2.02	3.74	1.23
ENSG00000182107	TMEM30B	161291	14	10.082	29.47	-1.46501	0.319268	-4.58866	4.46095e-06	2.03825e-05		12.79	9.03	8.43	25.21	38.62	24.58
ENSG00000286984			8	1.534	5.458	-1.46434	0.69381	-2.11058	0.0348082	0.0831194		1.07	1.13	2.41	4.03	3.74	8.6
ENSG00000272070			5	0.778	3.74	-1.46397	0.722168	-2.02719	0.042643	0.099104		0	1.13	1.2	5.04	2.49	3.69
ENSG00000214366	EIF4EP5		8	0.401	2.328	-1.46238	1.03259	-1.41623	0.156709			0	0	1.2	2.02	3.74	1.23
ENSG00000274021			12	2.266	7.54	-1.46202	0.715448	-2.0435	0.0410026	0.0958315		2.13	2.26	2.41	4.03	11.21	7.38
ENSG00000138670	RASGEF1B	153020	4	1.158	4.145	-1.46143	0.714408	-2.04565	0.040791	0.0954325		1.07	0	2.41	5.04	1.25	6.15
ENSG00000285911			9	0	2.169	-1.46117	0.989799	-1.47623	0.139881			0	0	0	4.03	1.25	1.23
ENSG00000240219			1	5.622	16.66	-1.46117	0.505638	-2.88975	0.00385549	0.0115576		7.46	3.39	6.02	14.12	16.19	19.67
ENSG00000136297	MMD2	221938	7	0.376	4.314	-1.46093	0.81448	-1.79369	0.0728624			0	1.13	0	3.02	6.23	3.69
ENSG00000196932	TMEM26	219623	10	1.864	6.073	-1.46031	0.923197	-1.5818	0.113696	0.226514		2.13	2.26	1.2	7.06	7.47	3.69
ENSG00000107485	GATA3	2625	10	293.006	807.2	-1.46024	0.105484	-13.8433	1.39669e-43	4.1712e-42		304.77	308.17	266.08	821.79	786.06	813.76
ENSG00000257513	NPIPB1P		18	0	1.828	-1.45981	1.0284	-1.41949	0.155756			0	0	0	3.02	0	2.46
ENSG00000187068	C3orf70	285382	3	0.376	2.396	-1.45976	1.04183	-1.40115	0.161169			0	1.13	0	1.01	2.49	3.69
ENSG00000267121		339192	17	126.162	348.756	-1.45899	0.191263	-7.62816	2.38123e-14	2.17785e-13		130.01	101.59	146.89	346.86	368.74	330.67
ENSG00000147571	CRH	1392	8	7.511	21.476	-1.45886	0.631823	-2.30898	0.0209449	0.0531415		9.59	4.52	8.43	21.17	17.44	25.81
ENSG00000142549	IGLON5	402665	19	0.778	2.989	-1.45673	0.867468	-1.6793	0.0930945	0.192358		0	1.13	1.2	4.03	1.25	3.69
ENSG00000151702	FLI1	2313	11	1.488	4.896	-1.45668	0.850167	-1.71341	0.0866376	0.181087		2.13	1.13	1.2	6.05	2.49	6.15
ENSG00000280107			6	0.376	2.732	-1.45652	0.806796	-1.80531	0.0710264	0.153699		0	1.13	0	2.02	2.49	3.69
ENSG00000257195	HNRNPA1P50		12	0.731	2.994	-1.45511	0.964251	-1.50906	0.131283	0.254388		1.07	1.13	0	4.03	2.49	2.46
ENSG00000232006			7	5.714	16.439	-1.45507	0.521469	-2.79033	0.00526536	0.0153817		5.33	3.39	8.43	17.14	16.19	15.98
ENSG00000281392		100846978	3	3.423	10.155	-1.4549	0.613712	-2.37065	0.0177568	0.0459327		3.2	2.26	4.82	13.11	11.21	6.15
ENSG00000014257	ACP3	55	3	1.91	6.172	-1.45324	0.624529	-2.32694	0.0199686	0.0509882		1.07	2.26	2.41	11.09	3.74	3.69
ENSG00000173114	LRRN3	54674	7	26.02	72.857	-1.45273	0.393026	-3.69628	0.000218785	0.000809548		35.17	24.83	18.06	62.52	88.45	67.61
ENSG00000107731	UNC5B	219699	10	41.526	114.314	-1.4524	0.25312	-5.73802	9.57926e-09	5.73829e-08		36.23	47.41	40.94	118.98	110.87	113.09
ENSG00000146278	PNRC1	10957	6	885.368	2426.2	-1.45224	0.0644821	-22.5216	2.55119e-112	2.58862e-110		935.62	850	870.49	2412.92	2439.15	2426.52
ENSG00000135636	DYSF	8291	2	27.463	77.468	-1.45185	0.214008	-6.78407	1.16833e-11	8.84842e-11		25.58	32.74	24.08	60.5	78.48	93.42
ENSG00000159450	TCHH	7062	1	12.469	34.501	-1.45177	0.310463	-4.67615	2.9231e-06	1.36265e-05		13.85	7.9	15.65	40.33	36.13	27.04
ENSG00000242779	ZNF702P	79986	19	0	1.576	-1.45176	0.900559	-1.61207	0.106946	0.215477		0	0	0	1.01	2.49	1.23
ENSG00000130433	CACNG6	59285	19	1551.11	4243.09	-1.45128	0.0599402	-24.2121	1.65727e-129	2.05154e-127		1508.93	1597.27	1547.13	4208.75	4226.78	4293.73
ENSG00000270264	NDUFB8P2		17	0	1.24	-1.45109	0.988045	-1.46865	0.141929	0.271404		0	0	0	0	2.49	1.23
ENSG00000165359	INTS6L	203522	X	8.481	25.724	-1.45005	0.336339	-4.31126	1.62324e-05	6.94098e-05		13.85	6.77	4.82	20.17	34.88	22.13
ENSG00000125775	SDCBP2	27111	20	5.635	16.385	-1.4497	0.461661	-3.14019	0.00168838	0.00541322		4.26	9.03	3.61	23.19	11.21	14.75
ENSG00000105327	BBC3	27113	19	667.592	1826.14	-1.44941	0.0903608	-16.0403	6.68318e-58	2.92853e-56		618.06	757.43	627.28	1823.05	1920.92	1734.46
ENSG00000214900	LINC01588	283551	14	99.913	274.452	-1.44873	0.134683	-10.7566	5.51688e-27	9.44584e-26		100.17	112.88	86.69	271.24	292.75	259.37
ENSG00000092529	CAPN3	825	15	5.965	17.442	-1.44852	0.585976	-2.47198	0.0134365	0.0358356		5.33	10.16	2.41	20.17	14.95	17.21
ENSG00000141086	CTRL	1506	16	0.401	2.169	-1.44817	0.951988	-1.52121	0.128208	0.249855		0	0	1.2	4.03	1.25	1.23
ENSG00000185507	IRF7	3665	11	4009.97	10950.1	-1.44765	0.0764625	-18.9328	6.12513e-80	3.99069e-78		3756.33	4270.3	4003.28	10620.7	11417.1	10812.4
ENSG00000267288		105371795	17	72.603	200.199	-1.44698	0.237448	-6.09386	1.10217e-09	7.16206e-09		75.66	53.05	89.1	201.67	235.44	163.49
ENSG00000163485	ADORA1	134	1	20.55	56.682	-1.44661	0.277843	-5.2066	1.92336e-07	1.01619e-06		14.92	21.45	25.28	57.47	53.57	59
ENSG00000116741	RGS2	5997	1	516.057	1409.84	-1.44639	0.100584	-14.38	6.91267e-47	2.29415e-45		538.14	507.97	502.07	1390.48	1447.54	1391.5
ENSG00000274286	ADRA2B	151	2	1.204	4.229	-1.44633	0.868461	-1.6654	0.0958335	0.197047		0	0	3.61	4.03	3.74	4.92
ENSG00000233816	IFNA13	3447	9	0	18.883	-1.44596	0.659953	-2.19101	0.0284511	0.0696522		0	0	0	12.1	22.42	22.13
ENSG00000105699	LSR	51599	19	356.095	969.795	-1.44567	0.0770554	-18.7615	1.55949e-78	1.00285e-76		338.87	364.61	364.81	999.25	920.6	989.54
ENSG00000177519	RPRM	56475	2	1.484	5.06	-1.44494	0.689979	-2.09418	0.036244	0.0861294		1.07	3.39	0	4.03	6.23	4.92
ENSG00000165507	DEPP1	11067	10	30.227	83.289	-1.44457	0.216873	-6.6609	2.72163e-11	1.99841e-10		26.64	32.74	31.3	82.68	93.43	73.75
ENSG00000168916	ZNF608	57507	5	49.06	134.919	-1.44368	0.171611	-8.41248	4.01418e-17	4.35318e-16		58.61	44.02	44.55	135.12	125.82	143.82
ENSG00000094975	SUCO	51430	1	1043.03	2842.2	-1.44313	0.0722605	-19.9712	9.79832e-89	7.2414e-87		1124.24	1027.22	977.64	2782.98	2832.8	2910.84
ENSG00000138271	GPR87	53836	3	3.356	9.844	-1.44297	0.516681	-2.79276	0.00522607	0.0152741		5.33	1.13	3.61	17.14	7.47	4.92
ENSG00000117013	KCNQ4	9132	1	23.538	64.798	-1.44252	0.31741	-4.54466	5.50248e-06	2.48414e-05		22.38	16.93	31.3	81.67	64.78	47.94
ENSG00000206190	ATP10A	57194	15	909.068	2472.94	-1.44209	0.0709778	-20.3174	9.02271e-92	6.83132e-90		887.67	996.74	842.8	2407.88	2363.16	2647.78
ENSG00000170961	HAS2	3037	8	380.96	1037.73	-1.44208	0.0909314	-15.859	1.21905e-56	5.18579e-55		413.46	382.67	346.75	1007.32	1036.45	1069.44
ENSG00000119283	TRIM67	440730	1	47.286	128.247	-1.44197	0.216426	-6.66265	2.68928e-11	1.9757e-10		40.49	50.8	50.57	131.08	125.82	127.84
ENSG00000256913			12	0.376	2.333	-1.4412	1.03909	-1.38699	0.165446			0	1.13	0	2.02	4.98	0
ENSG00000187595	ZNF385C	201181	17	18.632	51.24	-1.44085	0.33451	-4.30734	1.65233e-05	7.06048e-05		11.72	23.71	20.47	53.44	53.57	46.71
ENSG00000188375	H3-5	440093	12	1.133	4.082	-1.43967	0.769405	-1.87115	0.0613241	0.135656		1.07	1.13	1.2	6.05	3.74	2.46
ENSG00000252516	RNA5SP82		1	1.204	4.303	-1.43936	0.873829	-1.64719	0.0995191	0.203141		0	0	3.61	3.02	3.74	6.15
ENSG00000185436	IFNLR1	163702	1	160.049	433.678	-1.43918	0.10026	-14.3544	9.99389e-47	3.29905e-45		142.79	159.16	178.19	433.58	434.76	432.69
ENSG00000197919	IFNA1	3439	9	0	16.881	-1.43886	0.658953	-2.18356	0.0289949	0.0708643		0	0	0	17.14	23.67	9.83
ENSG00000132470	ITGB4	3691	17	3043.99	8256.58	-1.43847	0.055917	-25.7251	6.12728e-146	8.97629e-144		2977.36	3021.83	3132.79	7799.4	8594.32	8376.04
ENSG00000188660	LINC00319		21	0.401	2.464	-1.43777	1.0052	-1.43033	0.152621	0.28728		0	0	1.2	0	1.25	6.15
ENSG00000104140	RHOV	171177	15	399.95	1081.43	-1.43765	0.0905749	-15.8725	9.82409e-57	4.18632e-55		361.25	370.25	468.35	1196.88	984.13	1063.29
ENSG00000140022	STON2	85439	14	34.814	95.265	-1.43666	0.196741	-7.30227	2.82955e-13	2.4024e-12		45.82	23.71	34.92	113.94	74.74	97.11
ENSG00000130589	HELZ2	85441	20	10723.6	29055.5	-1.43659	0.0678356	-21.1775	1.54108e-99	1.27606e-97		10030.7	11355.9	10784.2	28072.8	29750.6	29343.2
ENSG00000203876	ADD3-AS1	100505933	10	0.376	2.385	-1.43605	0.891196	-1.61137	0.107099	0.215732		0	1.13	0	1.01	0	6.15
ENSG00000233680	HNRNPA1P27		X	2.266	7.003	-1.43595	0.710287	-2.02165	0.0432124	0.100251		2.13	2.26	2.41	11.09	6.23	3.69
ENSG00000261239	ANKRD26P1		16	1.158	4.145	-1.43586	0.917714	-1.5646	0.117676	0.23297		1.07	0	2.41	5.04	1.25	6.15
ENSG00000201659	RNU12-2P		X	0	1.576	-1.43521	1.04018	-1.37977	0.167657			0	0	0	1.01	2.49	1.23
ENSG00000185479	KRT6B	3854	12	0.401	2.311	-1.4349	1.04143	-1.37782	0.168258			0	0	1.2	2.02	0	4.92
ENSG00000272419	LINC01145		1	4.172	12.393	-1.434	0.470313	-3.04904	0.00229574	0.0071874		2.13	6.77	3.61	16.13	11.21	9.83
ENSG00000146122	DAAM2	23500	6	1.154	4.303	-1.43397	1.02422	-1.40006	0.161496			0	2.26	1.2	3.02	3.74	6.15
ENSG00000137462	TLR2	7097	4	2.333	7.182	-1.43313	0.611896	-2.34211	0.019175	0.049185		0	3.39	3.61	3.02	6.23	12.29
ENSG00000227039	ITGB2-AS1	100505746	21	16.821	46.498	-1.4328	0.294479	-4.86554	1.14147e-06	5.54127e-06		17.05	22.58	10.84	61.51	41.11	36.88
ENSG00000267551		100996351	19	6.513	18.575	-1.4321	0.579476	-2.47137	0.0134597	0.0358819		4.26	5.64	9.63	11.09	28.65	15.98
ENSG00000196247	ZNF107	51427	7	439.545	1189.02	-1.43206	0.0973219	-14.7147	5.19136e-49	1.83349e-47		483.79	372.51	462.33	1162.6	1212.1	1192.36
ENSG00000146411	SLC2A12	154091	6	161.037	435.091	-1.43136	0.109387	-13.0852	4.00028e-39	1.04914e-37		165.17	161.42	156.52	446.69	414.83	443.76
ENSG00000161609	KASH5	147872	19	1.555	5.89	-1.43096	0.622873	-2.29735	0.0215988	0.0546158		0	2.26	2.41	4.03	8.72	4.92
ENSG00000241983	RN7SL566P		19	0.376	2.506	-1.43084	1.03917	-1.37691	0.16854			0	1.13	0	5.04	1.25	1.23
ENSG00000267165	CHMP1B-AS1		18	1.112	4.161	-1.4307	0.814411	-1.75673	0.0789644	0.167838		2.13	0	1.2	5.04	4.98	2.46
ENSG00000153303	FRMD1	79981	6	0	1.907	-1.4303	1.01963	-1.40276	0.160689			0	0	0	2.02	1.25	2.46
ENSG00000205918	PDPK2P		16	0.71	3.153	-1.42935	0.944498	-1.51335	0.130191	0.252786		2.13	0	0	2.02	4.98	2.46
ENSG00000141448	GATA6	2627	18	116.836	315.321	-1.42921	0.114914	-12.4372	1.6412e-35	3.79746e-34		124.68	98.21	127.62	322.66	284.03	339.27
ENSG00000227765	MYL12BP2		4	0	1.424	-1.42905	1.0431	-1.37001	0.170684			0	0	0	3.02	1.25	0
ENSG00000140459	CYP11A1	1583	15	0	1.235	-1.4286	0.995502	-1.43506	0.151271	0.285367		0	0	0	0	1.25	2.46
ENSG00000145087	STXBP5L	9515	3	1.133	4.319	-1.42831	1.02996	-1.38677	0.165513			1.07	1.13	1.2	3.02	7.47	2.46
ENSG00000204961	PCDHA9	9752	5	0	1.156	-1.42639	1.00026	-1.42602	0.153863	0.289243		0	0	0	1.01	0	2.46
ENSG00000176510	OR10AC1	392133	7	0.376	4.156	-1.42623	0.809171	-1.76258	0.0779706			0	1.13	0	5.04	3.74	3.69
ENSG00000105894	PTN	5764	7	0.71	4.822	-1.42609	0.915828	-1.55716	0.119433			2.13	0	0	7.06	2.49	4.92
ENSG00000176641	RNF152	220441	18	0.757	3.342	-1.4244	1.03443	-1.37699	0.168514			1.07	0	1.2	5.04	4.98	0
ENSG00000154162	CDH12	1010	5	0.355	2.39	-1.42415	1.04163	-1.36724	0.17155			1.07	0	0	1.01	1.25	4.92
ENSG00000267606			19	0	1.24	-1.42368	0.990026	-1.43802	0.150428	0.284147		0	0	0	0	2.49	1.23
ENSG00000163273	NPPC	4880	2	1.133	3.967	-1.42334	0.925311	-1.53823	0.123994	0.243097		1.07	1.13	1.2	2.02	3.74	6.15
ENSG00000085117	CD82	3732	11	134.545	361.738	-1.42267	0.155519	-9.14787	5.80694e-20	7.34261e-19		131.07	137.72	134.85	360.98	387.42	336.81
ENSG00000159713	TPPP3	51673	16	88.389	236.691	-1.42232	0.177431	-8.01618	1.09088e-15	1.08205e-14		77.79	79.02	108.36	305.52	195.58	208.97
ENSG00000109943	CRTAM	56253	11	1.204	4.297	-1.42219	0.98211	-1.44809	0.147591	0.280241		0	0	3.61	3.02	2.49	7.38
ENSG00000215910	C1orf167	284498	1	0.376	2.317	-1.42183	0.84819	-1.67631	0.0936771	0.193223		0	1.13	0	2.02	1.25	3.69
ENSG00000125998	FAM83C	128876	20	0.731	2.983	-1.42169	0.883128	-1.60983	0.107435	0.216268		1.07	1.13	0	4.03	0	4.92
ENSG00000260115			16	0.376	2.249	-1.42159	0.846902	-1.67857	0.0932349	0.192584		0	1.13	0	3.02	2.49	1.23
ENSG00000139220	PPFIA2	8499	12	0	1.24	-1.42141	0.996997	-1.42569	0.153957	0.289398		0	0	0	0	2.49	1.23
ENSG00000130287	NCAN	1463	19	3.665	11.074	-1.4202	0.63215	-2.24662	0.0246645	0.0614206		7.46	1.13	2.41	17.14	7.47	8.6
ENSG00000157554	ERG	2078	21	0	1.156	-1.41968	0.965642	-1.4702	0.141509	0.270664		0	0	0	1.01	0	2.46
ENSG00000198155	ZNF876P	642280	4	0.355	2.254	-1.41964	0.837224	-1.69565	0.0899518	0.186842		1.07	0	0	3.02	3.74	0
ENSG00000156475	PPP2R2B	5521	5	0	1.161	-1.41955	1.01256	-1.40194	0.160934	0.299832		0	0	0	1.01	1.25	1.23
ENSG00000199668			16	0	1.833	-1.4195	1.02015	-1.39147	0.164084			0	0	0	3.02	1.25	1.23
ENSG00000197594	ENPP1	5167	6	259.398	696.631	-1.4193	0.119855	-11.8419	2.37145e-32	4.94212e-31		299.44	241.57	237.19	711.88	652.76	725.25
ENSG00000088881	EBF4	57593	20	91.503	245.084	-1.41908	0.188849	-7.51433	5.72012e-14	5.11259e-13		85.25	86.92	102.34	282.33	227.97	224.95
ENSG00000137747	TMPRSS13	84000	11	0	1.655	-1.41896	0.894019	-1.58717	0.112475	0.224478		0	0	0	0	3.74	1.23
ENSG00000276997			1	8.168	22.704	-1.41893	0.40011	-3.54635	0.000390603	0.00138825		10.66	9.03	4.82	32.27	14.95	20.9
ENSG00000227347	HNRNPKP2		2	2.266	7.051	-1.41884	0.700581	-2.02523	0.0428439	0.0995524		2.13	2.26	2.41	5.04	9.97	6.15
ENSG00000254607		101929427	11	2.968	9.63	-1.41827	0.940752	-1.50759	0.131658	0.255015		2.13	6.77	0	9.07	11.21	8.6
ENSG00000277901			20	0.731	3.074	-1.41783	0.956455	-1.48238	0.13824	0.265417		1.07	1.13	0	3.02	3.74	2.46
ENSG00000269761			19	0.376	2.842	-1.41776	1.00944	-1.40451	0.160167			0	1.13	0	6.05	1.25	1.23
ENSG00000176920	FUT2	2524	19	0.376	2.238	-1.41773	0.83292	-1.70212	0.0887328	0.184702		0	1.13	0	3.02	0	3.69
ENSG00000287390			5	4.886	14.078	-1.41664	0.647585	-2.18758	0.0287004	0.0702		5.33	4.52	4.82	15.12	4.98	22.13
ENSG00000150051	MKX	283078	10	0	1.161	-1.41662	0.970971	-1.45897	0.144574	0.275462		0	0	0	1.01	1.25	1.23
ENSG00000197959	DNM3	26052	1	32.893	88.578	-1.41661	0.203202	-6.97143	3.13742e-12	2.46356e-11		35.17	22.58	40.94	88.73	92.18	84.82
ENSG00000256008			12	1.484	5.563	-1.41621	1.02263	-1.38488	0.16609	0.307375		1.07	3.39	0	8.07	1.25	7.38
ENSG00000119699	TGFB3	7043	14	41.621	111.612	-1.41551	0.177042	-7.99534	1.29215e-15	1.27071e-14		41.56	32.74	50.57	115.96	98.41	120.47
ENSG00000225555			21	0.731	3.226	-1.41521	0.863022	-1.63983	0.101041	0.20562		1.07	1.13	0	1.01	4.98	3.69
ENSG00000267062			19	0	1.582	-1.41498	1.04214	-1.35777	0.174536			0	0	0	1.01	3.74	0
ENSG00000288009		101929004	6	8.381	23.402	-1.41352	0.407201	-3.47131	0.000517931	0.00180681		7.46	5.64	12.04	18.15	32.39	19.67
ENSG00000115414	FN1	2335	2	9922.07	26563.3	-1.41336	0.150896	-9.36643	7.50278e-21	9.93868e-20		10663.7	7412.91	11689.6	28586	22620	28483.9
ENSG00000225450			22	13.69	37.445	-1.41336	0.389641	-3.62733	0.000286372	0.00103929		11.72	11.29	18.06	34.28	46.09	31.96
ENSG00000181444	ZNF467	168544	7	185.008	493.21	-1.41265	0.139091	-10.1563	3.107e-24	4.77783e-23		169.43	176.09	209.49	535.42	475.87	468.34
ENSG00000147676	MAL2	114569	8	3.415	10.144	-1.41247	0.489589	-2.88501	0.00391405	0.0117218		1.07	6.77	2.41	13.11	8.72	8.6
ENSG00000229621	LINC01822	645949	2	1.488	5.054	-1.41216	1.00838	-1.40042	0.161388			2.13	1.13	1.2	4.03	4.98	6.15
ENSG00000267069			18	0.355	1.986	-1.41205	0.937754	-1.50578	0.132124	0.255776		1.07	0	0	1.01	2.49	2.46
ENSG00000106991	ENG	2022	9	2.287	7.614	-1.41161	0.600642	-2.35017	0.0187647	0.0482538		1.07	3.39	2.41	3.02	11.21	8.6
ENSG00000166268	MYRFL	196446	12	0	1.24	-1.41109	0.998835	-1.41274	0.157733	0.29513		0	0	0	0	2.49	1.23
ENSG00000162981	LRATD1	151354	2	2.638	7.901	-1.4106	0.552211	-2.55445	0.0106355	0.029044		1.07	5.64	1.2	10.08	7.47	6.15
ENSG00000164307	ERAP1	51752	5	2026.51	5390.5	-1.41002	0.054603	-25.8232	4.8738e-147	7.26901e-145		2047.07	2074.76	1957.69	5272.53	5331.74	5567.22
ENSG00000229145	ACTBP1		X	0.757	3.158	-1.40975	1.03431	-1.36298	0.172888			1.07	0	1.2	2.02	6.23	1.23
ENSG00000113594	LIFR	3977	5	699.919	1863.55	-1.40957	0.0956939	-14.73	4.13962e-49	1.46412e-47		742.74	667.13	689.89	1923.89	1760.22	1906.55
ENSG00000256364			12	2.738	8.322	-1.40909	0.772586	-1.82386	0.0681729	0.148316		1.07	1.13	6.02	10.08	9.97	4.92
ENSG00000125744	RTN2	6253	19	159.323	424.884	-1.40897	0.116211	-12.1242	7.86012e-34	1.71153e-32		136.4	186.25	155.32	380.14	436.01	458.51
ENSG00000175946	KLHL38	340359	8	2.266	6.746	-1.40883	0.695825	-2.02469	0.0428995	0.0996536		2.13	2.26	2.41	9.07	7.47	3.69
ENSG00000254802			8	0	3.667	-1.40809	0.684589	-2.05684	0.0397015			0	0	0	6.05	2.49	2.46
ENSG00000102466	FGF14	2259	13	0	1.161	-1.40804	1.01742	-1.38393	0.16638	0.30775		0	0	0	1.01	1.25	1.23
ENSG00000258092			12	0.71	3.063	-1.40794	0.928979	-1.51558	0.129627	0.251986		2.13	0	0	3.02	1.25	4.92
ENSG00000197406	DIO3	1735	14	2.734	8.122	-1.40761	0.859591	-1.63753	0.10152	0.206423		0	3.39	4.82	7.06	7.47	9.83
ENSG00000230154	AIDAP1		2	0.355	2.322	-1.40731	1.04174	-1.35093	0.176719			1.07	0	0	2.02	2.49	2.46
ENSG00000134830	C5AR2	27202	19	16.182	43.631	-1.40671	0.290627	-4.84027	1.2966e-06	6.25875e-06		13.85	21.45	13.24	50.42	43.6	36.88
ENSG00000179855	GIPC3	126326	19	9.539	26.364	-1.40621	0.328287	-4.28348	1.83989e-05	7.82545e-05		8.53	5.64	14.45	22.18	27.41	29.5
ENSG00000176046	NUPR1	26471	16	270.861	718.267	-1.40509	0.104244	-13.4788	2.08589e-41	5.83532e-40		272.8	265.27	274.51	692.72	688.89	773.19
ENSG00000177047	IFNW1	3467	9	0	10.955	-1.40476	0.654632	-2.14587	0.031883	0.077079		0	0	0	8.07	16.19	8.6
ENSG00000169255	B3GALNT1	8706	3	9.008	25.14	-1.40472	0.355922	-3.94672	7.92303e-05	0.000311957		7.46	13.55	6.02	22.18	28.65	24.58
ENSG00000059728	MXD1	4084	2	333.45	884.742	-1.40464	0.0755379	-18.5952	3.51493e-77	2.19201e-75		353.79	307.04	339.53	873.21	916.86	864.16
ENSG00000285722			22	5.305	14.911	-1.40458	0.526382	-2.66838	0.00762189	0.0215291		3.2	7.9	4.82	10.08	17.44	17.21
ENSG00000250240			5	1.154	4.218	-1.40404	0.7833	-1.79247	0.073058	0.157503		0	2.26	1.2	4.03	1.25	7.38
ENSG00000285649			1	0.71	3.158	-1.4033	0.912507	-1.53785	0.124084	0.243239		2.13	0	0	2.02	6.23	1.23
ENSG00000205089	CCNI2	645121	5	6.324	17.952	-1.40314	0.437556	-3.20677	0.00134233	0.00437917		7.46	7.9	3.61	19.16	21.18	13.52
ENSG00000180999	C1orf105	92346	1	3.516	9.882	-1.40279	0.652559	-2.14968	0.0315807	0.0764371		1.07	2.26	7.22	11.09	8.72	9.83
ENSG00000147223	RIPPLY1	92129	X	1.133	3.899	-1.40219	1.00213	-1.39921	0.16175			1.07	1.13	1.2	3.02	4.98	3.69
ENSG00000179520	SLC17A8	246213	12	0.71	3.142	-1.40193	1.03358	-1.35638	0.174977			2.13	0	0	2.02	2.49	4.92
ENSG00000164651	SP8	221833	7	0.355	1.912	-1.40167	0.931621	-1.50455	0.13244	0.256288		1.07	0	0	2.02	2.49	1.23
ENSG00000236446	CT47B1	643311	X	0	1.087	-1.40152	1.01352	-1.38283	0.166716	0.308257		0	0	0	2.02	1.25	0
ENSG00000169551	CT55	54967	X	0	1.161	-1.40116	0.975376	-1.43653	0.150852	0.284772		0	0	0	1.01	1.25	1.23
ENSG00000257752			12	0.778	3.068	-1.40067	0.898588	-1.55874	0.119057	0.235181		0	1.13	1.2	3.02	2.49	3.69
ENSG00000280604			21	0	1.235	-1.4006	0.982475	-1.42558	0.15399	0.289439		0	0	0	0	1.25	2.46
ENSG00000253585			8	0	1.497	-1.40021	1.03979	-1.34662	0.178101			0	0	0	2.02	1.25	1.23
ENSG00000285094	LINC01488		11	0	1.655	-1.39959	1.03426	-1.35322	0.175985			0	0	0	0	3.74	1.23
ENSG00000112981	NME5	8382	5	0	1.161	-1.39938	0.986949	-1.41788	0.156224	0.292816		0	0	0	1.01	1.25	1.23
ENSG00000198513	ATL1	51062	14	138.134	365.786	-1.39918	0.125455	-11.1528	6.9369e-29	1.26935e-27		144.93	147.87	121.6	388.21	362.51	346.65
ENSG00000112559	MDFI	4188	6	8.129	23.528	-1.39887	0.363655	-3.84669	0.000119724	0.000461486		13.85	4.52	6.02	16.13	27.41	27.04
ENSG00000286043			12	0.401	2.328	-1.39848	1.03835	-1.34683	0.178036	0.324389		0	0	1.2	2.02	3.74	1.23
ENSG00000136928	GABBR2	9568	9	6.179	16.827	-1.39837	0.510908	-2.73703	0.00619957	0.0178413		2.13	6.77	9.63	23.19	18.69	8.6
ENSG00000107968	MAP3K8	1326	10	902.466	2380.64	-1.39818	0.0613109	-22.8048	4.11178e-115	4.33189e-113		939.88	884.99	882.53	2437.12	2450.36	2254.42
ENSG00000130876	SLC7A10	56301	19	0	1.497	-1.39748	0.891728	-1.56716	0.117077	0.231924		0	0	0	2.02	1.25	1.23
ENSG00000125355	TMEM255A	55026	X	6.471	17.851	-1.39746	0.513406	-2.72193	0.00649012	0.0186077		6.39	3.39	9.63	20.17	14.95	18.44
ENSG00000220267	ACTBP8		6	0.355	1.992	-1.39719	0.914828	-1.52727	0.126695	0.247512		1.07	0	0	1.01	3.74	1.23
ENSG00000187498	COL4A1	1282	13	2610.1	6877.41	-1.39706	0.0428002	-32.6414	1.05971e-233	3.12337e-231		2528.73	2669.64	2631.93	6514.79	7027.19	7090.25
ENSG00000101347	SAMHD1	25939	20	5680.64	14966.3	-1.39675	0.0497741	-28.0617	2.87683e-173	5.27589e-171		5579.62	6105.74	5356.57	14982.7	14779.4	15136.9
ENSG00000130787	HIP1R	9026	12	1396.65	3681.88	-1.39667	0.073222	-19.0744	4.12191e-81	2.74329e-79		1385.31	1365.86	1438.77	3558.38	3988.84	3498.41
ENSG00000157303	SUSD3	203328	9	11.967	32.915	-1.39666	0.309242	-4.51639	6.29016e-06	2.81715e-05		13.85	12.42	9.63	28.23	33.63	36.88
ENSG00000129682	FGF13	2258	X	3.423	10.119	-1.39665	0.508568	-2.74625	0.00602812	0.0173883		3.2	2.26	4.82	8.07	12.46	9.83
ENSG00000159261	CLDN14	23562	21	0.401	3.063	-1.39653	0.978962	-1.42654	0.153712			0	0	1.2	3.02	1.25	4.92
ENSG00000169252	ADRB2	154	5	67.093	176.808	-1.39624	0.151228	-9.23265	2.64006e-20	3.40431e-19		51.15	77.89	72.24	170.41	174.4	185.62
ENSG00000106789	CORO2A	7464	9	80.753	213.859	-1.39612	0.128931	-10.8284	2.52452e-27	4.36468e-26		94.84	64.34	83.08	225.86	203.05	212.66
ENSG00000134376	CRB1	23418	1	0	1.24	-1.39586	1.0106	-1.38121	0.167214	0.30897		0	0	0	0	2.49	1.23
ENSG00000279433			18	0.803	3.221	-1.39574	1.02705	-1.35898	0.174154			0	0	2.41	1.01	3.74	4.92
ENSG00000143382	ADAMTSL4	54507	1	149.262	393.47	-1.39442	0.113517	-12.2839	1.10606e-34	2.47817e-33		149.19	144.49	154.11	392.24	388.67	399.5
ENSG00000267719	LINC02078	100652929	17	1.91	5.737	-1.3942	0.864245	-1.6132	0.106701	0.215105		1.07	2.26	2.41	6.05	7.47	3.69
ENSG00000241388	HNF1A-AS1	283460	12	17.736	46.816	-1.39336	0.338494	-4.11636	3.84903e-05	0.000157492		20.25	11.29	21.67	46.38	48.58	45.48
ENSG00000248099	INSL3	3640	19	5.714	16.086	-1.39328	0.61577	-2.26266	0.0236567	0.0591728		5.33	3.39	8.43	16.13	12.46	19.67
ENSG00000159753	CARMIL2	146206	16	43.602	114.946	-1.3932	0.168476	-8.26946	1.3457e-16	1.41413e-15		41.56	33.86	55.38	122.01	118.34	104.49
ENSG00000151617	EDNRA	1909	4	12.54	33.214	-1.39142	0.301548	-4.61426	3.94497e-06	1.81272e-05		12.79	6.77	18.06	35.29	32.39	31.96
ENSG00000278266			12	59.976	158.134	-1.39109	0.167094	-8.32515	8.42217e-17	8.93003e-16		59.68	56.44	63.81	162.34	173.16	138.9
ENSG00000171403	KRT9	3857	17	0	1.161	-1.39078	0.961058	-1.44713	0.147859	0.280664		0	0	0	1.01	1.25	1.23
ENSG00000271797			5	4.151	11.789	-1.39043	0.549397	-2.53083	0.0113793	0.0308743		3.2	5.64	3.61	13.11	9.97	12.29
ENSG00000135144	DTX1	1840	12	23.111	61.599	-1.38879	0.307532	-4.51591	6.3045e-06	2.82306e-05		28.77	23.71	16.86	63.52	61.04	60.23
ENSG00000202533			5	0	2.328	-1.38852	0.975875	-1.42284	0.154782			0	0	0	2.02	3.74	1.23
ENSG00000168143	FAM83B	222584	6	6.328	17.138	-1.3868	0.415076	-3.34107	0.000834555	0.00281058		8.53	5.64	4.82	19.16	22.42	9.83
ENSG00000136305	CIDEB	27141	14	2.152	6.797	-1.38624	0.879052	-1.57697	0.114802	0.228133		5.33	1.13	0	8.07	2.49	9.83
ENSG00000137265	IRF4	3662	6	7.194	19.859	-1.3859	0.692881	-2.0002	0.0454785	0.104789		5.33	9.03	7.22	21.17	22.42	15.98
ENSG00000119514	GALNT12	79695	9	199.55	522.504	-1.38589	0.100781	-13.7515	4.98833e-43	1.4685e-41		193.94	214.47	190.23	536.43	538.16	492.92
ENSG00000168404	MLKL	197259	16	1560.45	4081.53	-1.38569	0.0510662	-27.1352	3.7808e-162	6.41131e-160		1590.98	1631.13	1459.24	4113.97	4118.4	4012.24
ENSG00000240038	AMY2B	280	1	4.886	13.78	-1.38448	0.518142	-2.67201	0.00753973	0.0213238		5.33	4.52	4.82	14.12	13.7	13.52
ENSG00000269604			19	0.731	3.079	-1.38404	0.997496	-1.38752	0.165283	0.306202		1.07	1.13	0	3.02	4.98	1.23
ENSG00000050405	LIMA1	51474	12	1210.71	3161.8	-1.3831	0.0575919	-24.0155	1.91433e-127	2.30072e-125		1273.42	1210.09	1148.61	3251.85	3161.67	3071.87
ENSG00000273474			10	0	1.65	-1.38309	1.03106	-1.34143	0.179781			0	0	0	0	2.49	2.46
ENSG00000133256	PDE6B	5158	4	0	1.24	-1.38267	0.958413	-1.44266	0.149115	0.282291		0	0	0	0	2.49	1.23
ENSG00000256340	ABCC6P1		16	1.179	3.819	-1.38248	0.84599	-1.63416	0.102226	0.207656		0	1.13	2.41	4.03	3.74	3.69
ENSG00000232938	RPL23AP87	388574	17	0.376	1.992	-1.38214	0.92737	-1.49038	0.136123	0.261941		0	1.13	0	1.01	3.74	1.23
ENSG00000225194	LINC00092	100188953	9	0.71	3.074	-1.38197	1.03755	-1.33195	0.182877			2.13	0	0	3.02	3.74	2.46
ENSG00000241416	KRT8P13		3	1.53	4.912	-1.38178	0.813604	-1.69834	0.0894435	0.185885		0	3.39	1.2	6.05	6.23	2.46
ENSG00000152670	DDX4	54514	5	0.355	1.992	-1.38171	1.01555	-1.36056	0.173653	0.318443		1.07	0	0	1.01	3.74	1.23
ENSG00000186810	CXCR3	2833	X	0	1.161	-1.38163	1.01702	-1.35851	0.174303	0.319303		0	0	0	1.01	1.25	1.23
ENSG00000132256	TRIM5	85363	11	1783.59	4649.81	-1.38103	0.0432532	-31.929	1.05722e-223	2.9083e-221		1853.12	1807.23	1690.41	4693.76	4604.23	4651.44
ENSG00000175518	UBQLNL	143630	11	4.535	12.993	-1.38081	0.551648	-2.50306	0.0123125	0.0331413		5.33	2.26	6.02	8.07	13.7	17.21
ENSG00000273565			14	0.731	2.994	-1.37996	0.866054	-1.59339	0.111073	0.222218		1.07	1.13	0	4.03	2.49	2.46
ENSG00000240823	RN7SL23P		11	0.71	3.057	-1.3795	0.924289	-1.4925	0.135569	0.261118		2.13	0	0	3.02	0	6.15
ENSG00000003400	CASP10	843	2	383.116	998.26	-1.37932	0.0853923	-16.1527	1.08678e-58	4.84802e-57		393.22	379.28	376.85	1004.29	1047.66	942.83
ENSG00000156206	CFAP161	161502	15	0.401	1.912	-1.37891	0.968283	-1.42408	0.154425	0.29008		0	0	1.2	2.02	2.49	1.23
ENSG00000261140			16	0	1.24	-1.3789	1.02162	-1.34972	0.177105	0.323002		0	0	0	0	2.49	1.23
ENSG00000144230	GPR17	2840	2	0	1.503	-1.37888	1.03985	-1.32604	0.184827			0	0	0	2.02	2.49	0
ENSG00000286638			5	5.973	16.655	-1.37829	0.501536	-2.74815	0.00599334	0.0173021		7.46	5.64	4.82	20.17	22.42	7.38
ENSG00000132517	SLC52A1	55065	17	32.316	84.975	-1.37771	0.246476	-5.58961	2.27574e-08	1.31611e-07		35.17	30.48	31.3	91.76	68.52	94.65
ENSG00000173467	AGR3	155465	7	0	1.087	-1.37743	0.975721	-1.41171	0.158036	0.295603		0	0	0	2.02	1.25	0
ENSG00000238164	TNFRSF14-AS1		1	0	1.087	-1.37743	0.968182	-1.4227	0.154824	0.29072		0	0	0	2.02	1.25	0
ENSG00000188227	ZNF793	390927	19	3.516	10.119	-1.37706	0.503552	-2.7347	0.00624379	0.0179561		1.07	2.26	7.22	8.07	12.46	9.83
ENSG00000108669	CYTH1	9267	17	2380.83	6182.24	-1.376	0.0516453	-26.6434	2.13709e-156	3.45817e-154		2309.21	2469.84	2363.44	6175.99	6193.79	6176.93
ENSG00000135220	UGT2A3	79799	4	3.001	8.532	-1.37574	0.81659	-1.68474	0.0920388	0.190496		4.26	1.13	3.61	7.06	7.47	11.06
ENSG00000280279	LINC02887		17	0	1.161	-1.37512	0.991819	-1.38646	0.165606	0.306708		0	0	0	1.01	1.25	1.23
ENSG00000260121			16	0.757	2.926	-1.37478	0.871335	-1.57779	0.114615	0.22785		1.07	0	1.2	5.04	3.74	0
ENSG00000105711	SCN1B	6324	19	207.751	539.45	-1.37475	0.111443	-12.3359	5.80441e-35	1.30879e-33		200.34	212.22	210.7	551.55	543.14	523.66
ENSG00000112182	BACH2	60468	6	10.103	28.387	-1.37416	0.341236	-4.02701	5.64905e-05	0.000226456		11.72	10.16	8.43	17.14	31.14	36.88
ENSG00000276188			12	1.108	3.893	-1.37346	0.994062	-1.38167	0.167074			1.07	2.26	0	3.02	3.74	4.92
ENSG00000272540			6	2.621	7.955	-1.37326	0.68689	-1.99925	0.0455816	0.104987		3.2	2.26	2.41	4.03	12.46	7.38
ENSG00000121005	CRISPLD1	83690	8	49.688	130.411	-1.37318	0.171307	-8.01589	1.09345e-15	1.08417e-14		58.61	51.93	38.53	135.12	125.82	130.3
ENSG00000166979	EVA1C	59271	21	905.461	2346.08	-1.37269	0.0642353	-21.3697	2.55634e-101	2.16746e-99		929.23	915.47	871.69	2414.94	2238.58	2384.72
ENSG00000049089	COL9A2	1298	1	6.442	17.75	-1.37246	0.474813	-2.89053	0.00384599	0.0115305		5.33	6.77	7.22	21.17	8.72	23.36
ENSG00000285602			X	0.376	1.986	-1.37239	1.01675	-1.34978	0.177088			0	1.13	0	1.01	2.49	2.46
ENSG00000117707	PROX1	5629	1	2.575	7.571	-1.37236	0.842551	-1.62882	0.103352	0.209479		4.26	2.26	1.2	9.07	8.72	4.92
ENSG00000261298			2	1.885	5.822	-1.37222	0.890927	-1.54021	0.123508	0.242318		1.07	3.39	1.2	5.04	9.97	2.46
ENSG00000168135	KCNJ4	3761	22	2.291	6.876	-1.37203	0.712126	-1.92667	0.0540208	0.121641		2.13	1.13	3.61	7.06	3.74	9.83
ENSG00000047365	ARAP2	116984	4	37.968	98.864	-1.37198	0.187385	-7.32172	2.44819e-13	2.0908e-12		37.3	42.89	33.71	99.82	99.66	97.11
ENSG00000198482	ZNF808	388558	19	5.572	15.944	-1.37176	0.410259	-3.34365	0.000826838	0.00278629		7.46	5.64	3.61	18.15	13.7	15.98
ENSG00000260742			2	4.56	12.857	-1.37154	0.59333	-2.3116	0.0207996	0.0528215		5.33	1.13	7.22	10.08	16.19	12.29
ENSG00000249655			5	0.778	2.994	-1.37088	0.849269	-1.61418	0.106488	0.214746		0	1.13	1.2	4.03	2.49	2.46
ENSG00000142920	AZIN2	113451	1	42.262	109.617	-1.37086	0.209418	-6.54602	5.90922e-11	4.22224e-10		31.97	40.64	54.18	109.91	103.4	115.55
ENSG00000130427	EPO	2056	7	0	1.235	-1.36969	1.02005	-1.34277	0.179345	0.326152		0	0	0	0	1.25	2.46
ENSG00000258620			14	1.133	3.814	-1.36945	0.855776	-1.60025	0.109544	0.219762		1.07	1.13	1.2	4.03	2.49	4.92
ENSG00000165899	OTOGL	283310	12	1.864	5.795	-1.36906	0.678638	-2.01736	0.0436576	0.101158		2.13	2.26	1.2	5.04	3.74	8.6
ENSG00000267681			17	2.671	8.06	-1.36899	0.602416	-2.27251	0.023056	0.0578457		3.2	0	4.82	8.07	9.97	6.15
ENSG00000114541	FRMD4B	23150	3	139.547	361.51	-1.36855	0.107044	-12.7849	1.99051e-37	4.90359e-36		140.66	128.68	149.3	351.91	371.23	361.4
ENSG00000239219		100128164	3	0	1.161	-1.36817	1.01697	-1.34534	0.178516	0.324954		0	0	0	1.01	1.25	1.23
ENSG00000158125	XDH	7498	2	290.82	752.031	-1.36773	0.101216	-13.513	1.31058e-41	3.683e-40		270.67	310.42	291.37	709.86	731.25	814.99
ENSG00000267221	C17orf113	110806298	17	82.984	215.252	-1.36732	0.170652	-8.01231	1.12572e-15	1.11393e-14		74.59	93.69	80.67	213.77	225.48	206.51
ENSG00000117152	RGS4	5999	1	0.401	1.981	-1.36599	0.959449	-1.42372	0.154527	0.290228		0	0	1.2	1.01	1.25	3.69
ENSG00000285329			16	2.671	7.806	-1.36584	0.59657	-2.28949	0.0220507	0.0556278		3.2	0	4.82	11.09	2.49	9.83
ENSG00000128917	DLL4	54567	15	39.106	101.139	-1.36552	0.272115	-5.01815	5.21702e-07	2.63383e-06		26.64	48.54	42.14	113.94	105.89	83.59
ENSG00000186648	CARMIL3	90668	14	50.614	131.297	-1.36484	0.231244	-5.90216	3.58778e-09	2.2307e-08		38.36	49.67	63.81	117.97	135.79	140.13
ENSG00000073605	GSDMB	55876	17	109.283	283.174	-1.3643	0.192861	-7.07397	1.50564e-12	1.21185e-11		110.83	85.79	131.24	291.41	281.54	276.58
ENSG00000176845	METRNL	284207	17	136.91	354.535	-1.36385	0.115721	-11.7857	4.62652e-32	9.56122e-31		139.6	141.1	130.03	336.78	397.39	329.44
ENSG00000185482	STAC3	246329	12	17.255	45.502	-1.36317	0.321903	-4.23471	2.28842e-05	9.62077e-05		19.18	16.93	15.65	47.39	46.09	43.02
ENSG00000287263			5	264.609	681.758	-1.36251	0.104575	-13.0291	8.35592e-39	2.14824e-37		257.88	286.72	249.23	691.71	662.73	690.83
ENSG00000189266	PNRC2	55629	1	709.667	1828.3	-1.36249	0.0558787	-24.3829	2.59669e-131	3.29686e-129		726.76	711.15	691.09	1786.75	1900.99	1797.15
ENSG00000231133	HAR1B	768097	20	2.219	6.557	-1.36231	0.810351	-1.68114	0.0927363	0.19173		3.2	2.26	1.2	6.05	7.47	6.15
ENSG00000159650	UROC1	131669	3	0	1.156	-1.36227	1.02281	-1.33189	0.182898	0.331274		0	0	0	1.01	0	2.46
ENSG00000196878	LAMB3	3914	1	1253.57	3223.03	-1.36205	0.0532302	-25.5879	2.07951e-144	2.99328e-142		1197.76	1307.16	1255.77	3273.02	3275.03	3121.04
ENSG00000287467			8	0.355	1.975	-1.36149	1.00014	-1.3613	0.173418	0.318059		1.07	0	0	1.01	0	4.92
ENSG00000105246	EBI3	10148	19	60.799	156.996	-1.36126	0.174226	-7.81321	5.5751e-15	5.29656e-14		65	63.21	54.18	177.47	165.68	127.84
ENSG00000189167	ZAR1L	646799	13	1.154	3.972	-1.36108	0.893052	-1.52408	0.127489	0.24869		0	2.26	1.2	2.02	4.98	4.92
ENSG00000080224	EPHA6	285220	3	1.204	3.661	-1.36089	0.734258	-1.85343	0.0638214	0.140265		0	0	3.61	6.05	1.25	3.69
ENSG00000182040	USH1G	124590	17	2.667	7.803	-1.35988	0.669968	-2.02977	0.0423796	0.0986308		2.13	2.26	3.61	6.05	11.21	6.15
ENSG00000205809	KLRC2	3822	12	0.778	3.005	-1.35973	0.826593	-1.64498	0.0999741	0.203935		0	1.13	1.2	4.03	4.98	0
ENSG00000249274	PDLIM1P4		3	0	1.082	-1.3597	0.993044	-1.36923	0.170928	0.314447		0	0	0	2.02	0	1.23
ENSG00000116663	FBXO6	26270	1	445.426	1146.46	-1.35915	0.103208	-13.169	1.32284e-39	3.4953e-38		452.89	511.35	372.03	1116.22	1199.64	1123.52
ENSG00000286718			9	0	1.235	-1.35912	0.990867	-1.37164	0.170175	0.313458		0	0	0	0	1.25	2.46
ENSG00000169242	EFNA1	1942	1	365.576	936.869	-1.35904	0.0708348	-19.1861	4.83844e-82	3.27295e-80		371.9	343.16	381.67	994.21	896.93	919.47
ENSG00000136274	NACAD	23148	7	6.658	18.179	-1.35893	0.506735	-2.68174	0.00732403	0.0207588		9.59	6.77	3.61	16.13	22.42	15.98
ENSG00000105750	ZNF85	7639	19	2.337	7.466	-1.35735	0.559325	-2.42676	0.0152344	0.0400949		1.07	1.13	4.82	5.04	11.21	6.15
ENSG00000146221	TCTE1	202500	6	0.731	3	-1.35636	0.851567	-1.59278	0.111209	0.2224		1.07	1.13	0	4.03	3.74	1.23
ENSG00000158869	FCER1G	2207	1	2.713	7.781	-1.35618	0.720993	-1.88099	0.0599728	0.133093		1.07	2.26	4.82	6.05	6.23	11.06
ENSG00000279722			16	7.511	20.329	-1.35612	0.479609	-2.82756	0.00469044	0.0138327		9.59	4.52	8.43	15.12	28.65	17.21
ENSG00000109758	HGFAC	3083	4	3.449	9.972	-1.35557	0.623562	-2.17392	0.0297112	0.0724076		3.2	1.13	6.02	10.08	12.46	7.38
ENSG00000169962	TAS1R3	83756	1	9.727	26.148	-1.35552	0.36277	-3.73659	0.000186535	0.000698897		11.72	9.03	8.43	25.21	28.65	24.58
ENSG00000251258	RFPL4B	442247	6	0	1.156	-1.35547	1.02987	-1.31615	0.188124	0.338142		0	0	0	1.01	0	2.46
ENSG00000188013	MEIS3P2		17	38.156	98.534	-1.35514	0.255168	-5.31078	1.09158e-07	5.893e-07		34.1	40.64	39.73	98.82	100.9	95.88
ENSG00000054654	SYNE2	23224	14	974.198	2563.62	-1.35451	0.356321	-3.80136	0.000143901	0.000548869		1050.71	854.51	1017.37	2378.64	2094.08	3218.15
ENSG00000011600	TYROBP	7305	19	0	2.243	-1.35428	0.964077	-1.40475	0.160097			0	0	0	3.02	1.25	2.46
ENSG00000102921	N4BP1	9683	16	1768.38	4522.46	-1.3542	0.0432982	-31.2761	9.86794e-215	2.5449e-212		1765.74	1812.87	1726.53	4585.86	4322.7	4658.82
ENSG00000174804	FZD4	8322	11	192.065	491.167	-1.35415	0.10394	-13.0282	8.45859e-39	2.17238e-37		171.57	197.54	207.09	480.97	504.52	488.01
ENSG00000099840	IZUMO4	113177	19	6.797	18.837	-1.35398	0.437782	-3.09282	0.00198263	0.00627136		6.39	6.77	7.22	13.11	28.65	14.75
ENSG00000280219			4	3.043	8.486	-1.3538	0.581639	-2.32756	0.0199357	0.0509252		2.13	3.39	3.61	8.07	13.7	3.69
ENSG00000076706	MCAM	4162	11	340.591	870.101	-1.35349	0.0798116	-16.9586	1.66342e-64	8.56195e-63		325.02	348.8	347.95	891.36	870.77	848.18
ENSG00000275894			20	3.825	10.611	-1.35327	0.521964	-2.59264	0.00952413	0.0262728		3.2	2.26	6.02	12.1	4.98	14.75
ENSG00000237166	LINC01792		2	0	1.235	-1.35324	0.966647	-1.39994	0.161533	0.300671		0	0	0	0	1.25	2.46
ENSG00000261787	TCF24	100129654	8	3.686	10.401	-1.35263	0.679637	-1.99022	0.0465671	0.10683		6.39	2.26	2.41	15.12	7.47	8.6
ENSG00000198650	TAT	6898	16	5.28	14.111	-1.35224	0.596056	-2.26864	0.0232899	0.0583674		3.2	9.03	3.61	15.12	12.46	14.75
ENSG00000268521	VN1R83P		19	1.108	4.051	-1.35224	0.844196	-1.60181	0.109198	0.219165		1.07	2.26	0	1.01	6.23	4.92
ENSG00000286480			2	0.376	1.833	-1.35218	1.00051	-1.35149	0.176539	0.32235		0	1.13	0	3.02	1.25	1.23
ENSG00000166391	MOGAT2	80168	11	0	2.653	-1.35204	0.918119	-1.47262	0.140852			0	0	0	3.02	1.25	3.69
ENSG00000271933			10	0	1.161	-1.35202	1.02997	-1.31268	0.189289	0.339596		0	0	0	1.01	1.25	1.23
ENSG00000135318	NT5E	4907	6	4185.88	10690.8	-1.35155	0.0566972	-23.8381	1.34589e-125	1.602e-123		4178.32	4436.23	3943.08	10523.9	10945	10603.4
[truncated: 58,672 more rows]

## Sheet: H358
gene_id	gene_symbol	entrezgene	chromosome_name	normMean.H358_CTR	normMean.H358_KD	log2FoldChange	lfcSE	stat	pvalue	padj	spacer	H358_CTR1_.norm	H358_CTR2_.norm	H358_CTR3_.norm	H358_KD1_.norm	H358_KD2_.norm	H358_KD3_.norm
ENSG00000000003	TSPAN6	7105	X	1955.57	1546.1	0.33846	0.0597421	5.66536	1.46712e-08	1.60904e-07		1910.88	1974.32	1981.52	1526.86	1590.63	1520.81
ENSG00000000005	TNMD	64102	X	1.023	10.955	-2.45173	1.04301	-2.35064	0.0187414			1.51	1.56	0	11.12	13.75	7.99
ENSG00000000419	DPM1	8813	20	1936.75	1864.28	0.0545635	0.0624953	0.873081	0.382619	0.572368		1915.41	1901.86	1992.97	1850.2	1844.11	1898.52
ENSG00000000457	SCYL3	57147	1	801.635	846.341	-0.0781558	0.063336	-1.23399	0.217208	0.385138		788.39	822.76	793.75	858.86	851.81	828.35
ENSG00000000460	C1orf112	55732	1	1364.26	1356	0.00902953	0.0604236	0.149437	0.881209	0.957935		1366.64	1387.64	1338.51	1396.22	1298.84	1372.93
ENSG00000000938	FGR	2268	1	0.822	3.507	-1.54669	0.9214	-1.67863	0.0932237			1.51	0	0.95	5.56	1.96	3
ENSG00000000971	CFH	3075	1	3620.44	3779.55	-0.0621305	0.0598134	-1.03874	0.298926	0.482525		3570.8	3664.26	3626.27	3919.99	3785.49	3633.17
ENSG00000001036	FUCA2	2519	6	2210.7	2149.72	0.0396673	0.0465492	0.85216	0.394125	0.582664		2142.93	2246.24	2242.93	2218.02	2026.86	2204.28
ENSG00000001084	GCLC	2729	6	3108.18	2540.13	0.291495	0.0451528	6.45576	1.07679e-10	1.57613e-09		3124.07	3131.34	3069.12	2472.81	2544.62	2602.97
ENSG00000001167	NFYA	4800	6	1693	1543.37	0.133141	0.0560021	2.37743	0.0174339	0.0512849		1668.99	1715.65	1694.36	1583.37	1518.91	1527.81
ENSG00000001460	STPG1	90529	1	669.092	682.414	-0.0271745	0.0731367	-0.371558	0.710222	0.851531		675.76	685.64	645.88	676.34	705.42	665.48
ENSG00000001461	NIPAL3	57185	1	3689.2	3507.43	0.0724168	0.0458851	1.57822	0.114515	0.23705		3632.02	3600.37	3835.2	3397.44	3612.58	3512.26
ENSG00000001497	LAS1L	81887	X	1873.47	1847.6	0.0198874	0.0533755	0.372594	0.709451	0.85115		1882.15	1868.36	1869.9	1900.23	1794.01	1848.56
ENSG00000001561	ENPP4	22875	6	843.209	566.997	0.570838	0.145336	3.9277	8.57606e-05	0.000483563		823.16	864.06	842.41	551.26	667.1	482.62
ENSG00000001617	SEMA3F	6405	3	95.569	110.781	-0.204783	0.139246	-1.47066	0.141384	0.28006		112.63	87.26	86.82	106.55	118.88	106.92
ENSG00000001626	CFTR	1080	7	2.097	0.969	0.832913	0.851888	0.977727	0.32821			3.78	1.56	0.95	0.93	0.98	1
ENSG00000001629	ANKIB1	54467	7	2813	2818.11	-0.0039364	0.0594058	-0.0662629	0.947169	0.996502		2690.95	2664.64	3083.43	2874.9	2886.53	2692.9
ENSG00000001630	CYP51A1	1595	7	312.309	273.565	0.19088	0.11028	1.73087	0.0834758	0.184742		289.5	337.36	310.06	263.12	292.78	264.79
ENSG00000001631	KRIT1	889	7	198.871	204.666	-0.0464	0.105963	-0.43789	0.661466	0.814309		185.95	189.33	221.34	189.93	211.23	212.83
ENSG00000002016	RAD52	5893	12	213.485	230.287	-0.107181	0.105574	-1.01522	0.31	0.495541		231.3	208.81	200.35	254.79	210.25	225.82
ENSG00000002079	MYH16		7	124.125	129.643	-0.0632802	0.188316	-0.336032	0.736847	0.870711		108.09	131.67	132.61	119.52	139.51	129.9
ENSG00000002330	BAD	572	11	1392.61	1186.89	0.231027	0.0530598	4.35409	1.33622e-05	8.92321e-05		1329.6	1451.53	1396.7	1103.45	1224.17	1233.04
ENSG00000002549	LAP3	51056	4	4363.81	7468.07	-0.774597	0.0467357	-16.574	1.07496e-61	2.21667e-59		4350.11	4434.83	4306.5	7461.04	7223.19	7719.98
ENSG00000002586	CD99	4267	X	2169.49	1961.99	0.143162	0.041686	3.4343	0.000594075	0.00273566		2042.4	2208.84	2257.24	1998.44	1961.03	1926.5
ENSG00000002587	HS3ST1	9957	4	1322.7	1730.92	-0.387058	0.0710404	-5.44841	5.08209e-08	5.10249e-07		1332.62	1358.03	1277.45	1703.82	1779.27	1709.67
ENSG00000002726	AOC1	26	7	90.848	69.486	0.386761	0.311932	1.23989	0.215016	0.38219		89.19	92.72	90.63	69.49	54.04	84.93
ENSG00000002745	WNT16	51384	7	0	0							0	0	0	0	0	0
ENSG00000002746	HECW1	23072	7	2.675	0.618	0.94105	0.636744	1.47791	0.139432	0.276901		3.78	2.34	1.91	1.85	0	0
ENSG00000002822	MAD1L1	8379	7	42.854	153.62	-1.82372	0.286854	-6.35766	2.04856e-10	2.89903e-09		45.35	28.83	54.38	156.58	145.41	158.88
ENSG00000002834	LASP1	3927	17	12695.3	10546.3	0.267374	0.0382328	6.99332	2.68448e-12	4.72554e-11		12487.2	12685.9	12912.8	10419.3	10546.9	10672.7
ENSG00000002919	SNX11	29916	17	649.819	771.433	-0.243939	0.0568022	-4.29454	1.75055e-05	0.000114178		668.2	663.04	618.21	745.83	780.09	788.39
ENSG00000002933	TMEM176A	55365	7	0.318	0.636	-0.315948	0.922086	-0.342644	0.731866			0	0	0.95	0.93	0.98	0
ENSG00000003056	M6PR	4074	12	3832.61	3373.83	0.182834	0.0407556	4.4861	7.25401e-06	5.09628e-05		3755.99	3740.62	4001.21	3453.03	3304.08	3364.38
ENSG00000003096	KLHL13	90293	X	767.924	568.7	0.432859	0.0977557	4.42797	9.5126e-06	6.52665e-05		749.84	757.32	796.62	540.14	594.4	571.55
ENSG00000003137	CYP26B1	56603	2	581.622	931.282	-0.675806	0.0763951	-8.8462	9.05529e-19	2.86547e-17		602.44	601.49	540.94	924.64	957.92	911.29
ENSG00000003147	ICA1	3382	7	467.384	417.058	0.165728	0.118969	1.39304	0.163609	0.312385		464.11	487.74	450.3	380.79	406.75	463.64
ENSG00000003249	DBNDD1	79007	16	638.321	512.957	0.319708	0.0847209	3.77366	0.000160867	0.000856602		690.12	684.86	539.98	476.22	558.05	504.61
ENSG00000003393	ALS2	57679	2	1178.05	1167.75	0.0117907	0.0545163	0.216278	0.828771	0.927172		1190.52	1119.61	1224.02	1126.61	1202.56	1174.08
ENSG00000003400	CASP10	843	2	308.561	334.349	-0.119819	0.0911044	-1.31518	0.188449	0.346657		304.62	289.06	332	352.07	323.24	327.74
ENSG00000003402	CFLAR	8837	2	2452.53	3466.97	-0.501405	0.0515397	-9.72853	2.27873e-22	8.90841e-21		2344	2268.84	2744.75	3534.56	3535.94	3330.4
ENSG00000003436	TFPI	7035	2	1476.54	1435.73	0.0388638	0.0764781	0.508169	0.611335	0.775376		1418.79	1424.26	1586.55	1552.8	1434.42	1319.97
ENSG00000003509	NDUFAF7	55471	2	540.636	578.752	-0.0973572	0.0770281	-1.26392	0.20626	0.37084		563.13	532.15	526.63	591.1	583.59	561.56
ENSG00000003756	RBM5	10181	3	1819.96	2369.79	-0.379154	0.0745599	-5.08523	3.67185e-07	3.22425e-06		2044.67	1764.74	1650.47	2432.97	2167.35	2509.04
ENSG00000003987	MTMR7	9108	8	0	0	0	0.99558	0	1	1		0	0	0	0	0	0
ENSG00000003989	SLC7A2	6542	8	0.822	0.309	0.192844	0.710678	0.271351	0.786121	0.903223		1.51	0	0.95	0.93	0	0
ENSG00000004059	ARF5	381	7	2694.5	2389.08	0.174083	0.0405164	4.2966	1.7344e-05	0.000113203		2662.98	2742.55	2677.97	2293.99	2402.16	2471.07
ENSG00000004139	SARM1	23098	17	444.242	371.781	0.260098	0.083796	3.10395	0.00190956	0.00765497		476.21	438.65	417.87	338.17	423.45	353.72
ENSG00000004142	POLDIP2	26073	17	3876.01	4104.33	-0.082249	0.0445887	-1.84461	0.0650936	0.151155		3832.33	3929.95	3865.73	3933.88	4009.5	4369.59
ENSG00000004399	PLXND1	23129	3	936.844	453.791	1.04677	0.0733578	14.2693	3.39824e-46	4.03595e-44		948.63	1000.41	861.49	414.14	529.56	417.67
ENSG00000004455	AK2	204	1	5982.69	6094.94	-0.0268684	0.0338015	-0.794889	0.426678	0.614287		5880.02	6109.18	5958.88	6226.02	5852.63	6206.16
ENSG00000004468	CD38	952	4	12.868	18.808	-0.516093	0.274723	-1.8786	0.0602996	0.14208		15.12	10.13	13.36	14.82	21.61	19.98
ENSG00000004478	FKBP4	2288	12	6172.37	5231.17	0.238697	0.0377838	6.31745	2.65915e-10	3.7238e-09		6243.6	6162.94	6110.57	5297.68	5163.91	5231.92
ENSG00000004487	KDM1A	23028	1	4449	3656.26	0.28407	0.0374268	7.59	3.19897e-14	6.86828e-13		4526.24	4578.19	4242.58	3622.58	3581.14	3765.07
ENSG00000004534	RBM6	10180	3	2984.53	3074.84	-0.0423878	0.0430366	-0.984925	0.324661	0.510838		3077.96	2959.15	2916.47	3085.22	2984.77	3154.54
ENSG00000004660	CAMKK1	84254	17	445.784	371.615	0.263795	0.0753683	3.50008	0.000465111	0.00221013		458.07	460.47	418.82	396.54	359.59	358.72
ENSG00000004700	RECQL	5965	12	814.32	661.967	0.294708	0.0629477	4.68179	2.84376e-06	2.15609e-05		774.78	792.38	875.8	680.04	652.37	653.49
ENSG00000004766	VPS50	55610	7	745.359	648.925	0.200144	0.0645685	3.09971	0.00193708	0.00774811		755.13	733.94	747.01	625.38	678.89	642.5
ENSG00000004776	HSPB6	126393	19	3.764	3.236	0.186014	0.600999	0.309509	0.756935	0.88415		4.54	3.9	2.86	2.78	3.93	3
ENSG00000004777	ARHGAP33	115703	19	556.038	447.425	0.313538	0.153862	2.03779	0.0415713	0.10502		659.89	570.33	437.9	479.92	467.66	394.69
ENSG00000004779	NDUFAB1	4706	16	2189.81	2035.08	0.105644	0.0558297	1.89225	0.0584573	0.138452		2056.01	2303.9	2209.54	1947.49	2052.4	2105.36
ENSG00000004799	PDK4	5166	7	244.991	164.692	0.571542	0.109105	5.23848	1.61902e-07	1.50251e-06		229.03	257.89	248.05	144.53	186.67	162.87
ENSG00000004809	SLC22A16	85413	6	0.26	0.327	-0.0250176	0.648688	-0.0385664	0.969236			0	0.78	0	0	0.98	0
ENSG00000004838	ZMYND10	51364	3	8.676	7.785	0.156086	0.455209	0.342889	0.731682	0.867067		9.83	8.57	7.63	6.49	6.88	9.99
ENSG00000004846	ABCB5	340273	7	5.226	7.441	-0.411094	0.936494	-0.438972	0.660682			8.31	5.45	1.91	6.49	8.84	6.99
ENSG00000004848	ARX	170302	X	36.148	40.674	-0.162456	0.250788	-0.647783	0.517125	0.700741		42.33	32.72	33.39	39.84	44.21	37.97
ENSG00000004864	SLC25A13	10165	7	2036.01	1784.1	0.189774	0.0501872	3.78132	0.000156001	0.000833765		2035.6	2011.72	2060.71	1862.25	1714.43	1775.62
ENSG00000004866				754.429	747.092	0.015446	0.0596947	0.25875	0.795828	0.908596		756.64	768.23	738.42	733.78	723.11	784.39
ENSG00000004897	CDC27	996	17	2579.61	2106.96	0.290147	0.0650736	4.45875	8.24373e-06	5.73576e-05		2381.79	2447.26	2909.79	2100.36	2180.12	2040.41
ENSG00000004939	SLC4A1	6521	17	0.26	0.969	-0.900937	1.03655	-0.869166	0.384756			0	0.78	0	0.93	0.98	1
ENSG00000004948	CALCR	799	7	1.275	1.896	-0.354916	1.0392	-0.341529	0.732705			2.27	1.56	0	3.71	0.98	1
ENSG00000004961	HCCS	3052	X	1137.12	1326.36	-0.222974	0.0521739	-4.27367	1.92279e-05	0.000124461		1100.57	1146.88	1163.92	1333.22	1293.93	1351.95
ENSG00000004975	DVL2	1856	17	1499.21	1414.17	0.0850645	0.0507579	1.67589	0.0937607	0.202721		1491.36	1529.44	1476.84	1348.97	1477.65	1415.9
ENSG00000005001	PRSS22	64063	16	2329.84	4114.79	-0.818329	0.0962449	-8.50257	1.85432e-17	5.2483e-16		2542.04	2457.39	1990.11	4305.41	4032.1	4006.88
ENSG00000005007	UPF1	5976	19	5259.85	5226.89	0.00877929	0.0401959	0.218413	0.827108	0.926376		5167.23	5245.9	5366.42	5185.57	5320.13	5174.97
ENSG00000005020	SKAP2	8935	7	3188.14	2302.34	0.468172	0.054342	8.61527	6.97748e-18	2.04582e-16		3049.24	3042.52	3472.67	2272.68	2349.11	2285.22
ENSG00000005022	SLC25A5	292	X	19689.8	15210.9	0.372365	0.0332495	11.1991	4.1187e-29	2.55919e-27		19232	20280.8	19556.7	14689.5	15221.6	15721.8
ENSG00000005059	MCUB	55013	4	529.952	461.159	0.197766	0.0766162	2.58125	0.00984421	0.031561		520.05	521.24	548.57	490.11	465.7	427.67
ENSG00000005073	HOXA11	3207	7	0	0	0	0.895056	0	1	1		0	0	0	0	0	0
ENSG00000005075	POLR2J	5439	7	611.615	528.402	0.213592	0.0741451	2.88073	0.00396752	0.0145383		617.56	642.01	575.28	498.45	551.17	535.58
ENSG00000005100	DHX33	56919	17	2042.67	2038.05	0.00149188	0.0496427	0.0300523	0.976025	1		1993.27	1933.81	2200.95	2016.05	2035.7	2062.39
ENSG00000005102	MEOX1	4222	17	0	0	0	1.01802	0	1	1		0	0	0	0	0	0
ENSG00000005108	THSD7A	221981	7	21.243	35.985	-0.766884	0.225425	-3.40194	0.000669092	0.00303934		18.14	17.92	27.67	28.72	41.26	37.97
ENSG00000005156	LIG3	3980	17	1408.18	1201.76	0.226004	0.0454124	4.97669	6.46793e-07	5.44752e-06		1354.54	1396.99	1473.02	1219.26	1237.92	1148.11
ENSG00000005175	RPAP3	79657	12	1559.9	1287.52	0.276515	0.068449	4.03972	5.35153e-05	0.000316487		1507.23	1613.58	1558.89	1263.73	1357.79	1241.03
ENSG00000005187	ACSM3	6296	16	299.061	185.028	0.692156	0.129247	5.35529	8.54174e-08	8.27068e-07		316.72	291.4	289.07	187.15	163.09	204.84
ENSG00000005189	REXO5	81691	16	244.998	215.733	0.182728	0.0948986	1.92551	0.0541656	0.130126		244.91	247.76	242.32	228.84	194.53	223.83
ENSG00000005194	CIAPIN1	57019	16	2255.03	2383.21	-0.0801402	0.046145	-1.7367	0.0824394	0.182987		2248.76	2184.69	2331.65	2280.1	2385.46	2484.06
ENSG00000005206	SPPL2B	56928	19	965.641	959.562	0.0107376	0.139493	0.0769757	0.938643	0.99208		1131.56	1047.93	717.43	979.3	946.13	953.26
ENSG00000005238	FAM214B	80256	9	1563.96	1894.99	-0.27615	0.0525589	-5.25411	1.48746e-07	1.38728e-06		1535.96	1644.75	1511.19	1913.2	1952.19	1819.58
ENSG00000005243	COPZ2	51226	17	1.082	2.946	-0.910378	0.61487	-1.4806	0.138713	0.275765		1.51	0.78	0.95	0.93	4.91	3
ENSG00000005249	PRKAR2B	5577	7	735.303	480.497	0.612375	0.0827229	7.40272	1.33419e-13	2.71835e-12		739.25	725.37	741.28	495.67	495.17	450.65
ENSG00000005302	MSL3	10943	X	692.944	682.109	0.0223286	0.0667468	0.334526	0.737982	0.871434		708.26	673.17	697.4	696.72	665.14	684.47
ENSG00000005339	CREBBP	1387	16	3498.32	3452.07	0.0186493	0.138023	0.135118	0.892519	0.964031		3026.56	2973.95	4494.44	3059.27	4009.5	3287.44
ENSG00000005379	TSPOAP1	9256	17	20.469	24.164	-0.221439	0.509041	-0.435012	0.663554			19.65	26.49	15.26	25.02	28.49	18.99
ENSG00000005381	MPO	4353	17	0	0.309	-0.128891	0.648688	-0.198695	0.842502			0	0	0	0.93	0	0
ENSG00000005421	PON1	5444	7	6.347	9.02	-0.483674	0.48843	-0.990264	0.322045	0.508343		9.07	2.34	7.63	10.19	6.88	9.99
ENSG00000005436	GCFC2	6936	2	650.945	577.379	0.170318	0.0718726	2.36972	0.0178014	0.0521698		610	660.7	682.13	597.59	561	573.55
ENSG00000005448	WDR54	84058	2	1418.22	1305.47	0.121004	0.0567874	2.13082	0.0331036	0.0874053		1426.35	1476.46	1351.86	1253.54	1351.89	1310.98
ENSG00000005469	CROT	54677	7	305.526	261.824	0.220944	0.0959874	2.3018	0.0213464	0.06049		323.52	282.05	311.01	271.46	269.2	244.81
ENSG00000005471	ABCB4	5244	7	1.977	0	1.99845	1.00497	1.98857	0.0467486			1.51	1.56	2.86	0	0	0
ENSG00000005483	KMT2E	55904	7	2516.99	2450.16	0.0370463	0.052173	0.710067	0.477662	0.663852		2490.64	2307.01	2753.33	2470.95	2560.34	2319.19
ENSG00000005486	RHBDD2	57414	7	2700.02	2407.45	0.166534	0.0616559	2.70103	0.00691249	0.0234647		2752.93	2848.51	2498.61	2239.33	2467.99	2515.04
ENSG00000005513	SOX8	30812	16	0.837	1.327	-0.452004	0.797565	-0.56673	0.570897	0.743705		0	1.56	0.95	0	0.98	3
ENSG00000005700	IBTK	25998	6	3952.12	3781.27	0.0627608	0.079725	0.787217	0.431155	0.61861		3631.27	3636.21	4588.89	3966.31	3856.23	3521.26
ENSG00000005801	ZNF195	7748	11	1307.94	1249.74	0.0655565	0.0721512	0.908599	0.363562	0.552811		1376.47	1266.09	1281.26	1367.5	1139.68	1242.03
ENSG00000005810	MYCBP2	23077	13	2590.11	2385.3	0.116537	0.265048	0.439684	0.660166	0.813478		1771.79	1820.83	4177.7	2092.02	2765.68	2298.21
ENSG00000005812	FBXL3	26224	13	770.341	829.919	-0.107024	0.06722	-1.59214	0.111352	0.231886		751.35	795.5	764.18	808.83	865.56	815.36
ENSG00000005844	ITGAL	3683	16	1.089	0.969	0.0535516	0.804482	0.0665666	0.946927	0.996369		0.76	1.56	0.95	0.93	0.98	1
ENSG00000005882	PDK2	5164	17	625.122	485.456	0.368954	0.0837755	4.40409	1.0623e-05	7.21726e-05		685.59	649.8	539.98	456.76	504.99	494.61
ENSG00000005884	ITGA3	3675	17	25184.9	30196.2	-0.261666	0.0426085	-6.14115	8.19246e-10	1.07429e-08		25259.4	25514.3	24781	30142.5	31237	29209.2
ENSG00000005889	ZFX	7543	X	1024.26	1058.94	-0.0490987	0.0635168	-0.773002	0.439521	0.626957		1050.68	941.19	1080.92	1032.11	1032.59	1112.13
ENSG00000005893	LAMP2	3920	X	5006.14	3909.03	0.355765	0.0579183	6.14254	8.12103e-10	1.06716e-08		4595.02	4935.81	5487.59	3979.28	4055.68	3692.12
ENSG00000005961	ITGA2B	3674	17	25.008	21.561	0.228373	0.261021	0.874923	0.381616	0.571738		27.21	33.5	14.31	25.02	17.68	21.98
ENSG00000005981	ASB4	51666	7	44.917	21.304	1.06705	0.285761	3.73408	0.000188401	0.000985841		43.09	50.64	41.02	20.38	25.54	17.99
ENSG00000006007	GDE1	51573	16	3187.83	2626.42	0.279334	0.0452363	6.175	6.61624e-10	8.79899e-09		3190.59	3166.4	3206.5	2591.4	2638.94	2648.94
ENSG00000006015	REX1BD	55049	19	816.48	800.641	0.0304077	0.0851464	0.357123	0.721	0.860112		842.81	871.07	735.56	781.96	807.6	812.37
ENSG00000006016	CRLF1	9244	19	10.642	9.009	0.245759	0.411732	0.596889	0.550581	0.730264		15.12	10.13	6.68	10.19	8.84	7.99
ENSG00000006025	OSBPL7	114881	17	1826.84	2761.39	-0.591838	0.162898	-3.63318	0.000279949	0.00140533		2169.39	1947.83	1363.31	2873.98	2790.24	2619.96
ENSG00000006042	TMEM98	26022	17	0.26	0.309	-0.197099	0.790029	-0.249483	0.802987	0.91206		0	0.78	0	0.93	0	0
ENSG00000006047	YBX2	51087	17	1052.6	1108.81	-0.0733873	0.148183	-0.495246	0.620426	0.782413		1225.29	1140.65	791.85	1197.95	1047.32	1081.16
ENSG00000006059	KRT33A	3883	17	0	0							0	0	0	0	0	0
ENSG00000006062	MAP3K14	9020	17	821.089	1010.89	-0.298888	0.0604121	-4.94749	7.51772e-07	6.28095e-06		826.94	849.26	787.08	1071.95	982.48	978.24
ENSG00000006071	ABCC8	6833	11	0	0.333	-0.556809	0.908639	-0.612794	0.540012	0.720362		0	0	0	0	0	1
ENSG00000006116	CACNG3	10368	16	0	0	0	0.648688	0	1			0	0	0	0	0	0
ENSG00000006118	TMEM132A	54972	11	587.811	646.724	-0.134617	0.0918129	-1.46621	0.142591	0.281538		653.84	582.01	527.58	624.46	660.23	655.49
ENSG00000006125	AP2B1	163	17	17183.6	14710.8	0.223777	0.0463206	4.83106	1.3581e-06	1.0933e-05		16643.1	16181	18726.7	14484.8	14564.3	15083.2
ENSG00000006128	TAC1	6863	7	0	0	0	0.789125	0	1			0	0	0	0	0	0
ENSG00000006194	ZNF263	10127	16	1856.18	2039.88	-0.134166	0.0432028	-3.10549	0.00189962	0.0076249		1947.91	1844.21	1776.41	2005.85	1994.43	2119.35
ENSG00000006210	CX3CL1	6376	16	834.121	562.688	0.567475	0.0985138	5.76037	8.39318e-09	9.56853e-08		820.89	873.41	808.06	592.95	588.51	506.61
ENSG00000006282	SPATA20	64847	17	1454.81	1618.93	-0.151871	0.0856116	-1.77395	0.0760709	0.171571		1630.44	1548.14	1185.86	1664.91	1561.16	1630.73
ENSG00000006283	CACNA1G	8913	17	21.54	12.308	0.780972	0.279284	2.79634	0.00516854	0.0181897		27.97	19.48	17.17	9.26	18.67	8.99
ENSG00000006327	TNFRSF12A	51330	16	6570.67	8108.95	-0.303134	0.0566286	-5.35302	8.64989e-08	8.36676e-07		6418.21	6875.07	6418.72	8062.33	8138.86	8125.67
ENSG00000006377	DLX6	1750	7	0	0	0	0.960881	0	1			0	0	0	0	0	0
ENSG00000006432	MAP3K9	4293	14	4884.44	5725.52	-0.229177	0.107627	-2.12937	0.0332234	0.0876722		4258.65	4192.52	6202.16	5467.23	6246.61	5462.74
ENSG00000006451	RALA	5898	7	1318.65	1343.23	-0.0275769	0.0525843	-0.524433	0.599978	0.766359		1271.4	1322.19	1362.36	1315.62	1337.16	1376.93
ENSG00000006453	BAIAP2L1	55971	7	4665.02	5335.09	-0.193413	0.0317461	-6.09248	1.11172e-09	1.42274e-08		4710.67	4650.65	4633.73	5366.24	5258.23	5380.81
ENSG00000006459	KDM7A	80853	7	278.515	322.745	-0.216902	0.122291	-1.77365	0.0761204	0.171621		279.68	226.73	329.14	322.42	333.06	312.76
ENSG00000006468	ETV1	2115	7	993.016	524.279	0.920312	0.0762768	12.0654	1.60824e-33	1.22677e-31		951.66	1040.92	986.47	528.1	554.12	490.62
ENSG00000006530	AGK	55750	7	1274.02	1301.25	-0.0302454	0.056905	-0.531508	0.595067	0.762403		1254.01	1326.86	1241.19	1360.09	1252.66	1290.99
ENSG00000006534	ALDH3B1	221	11	3445.41	2789.09	0.304192	0.0633842	4.79918	1.59317e-06	1.26731e-05		3311.53	3437.54	3587.16	2761.87	2887.51	2717.88
ENSG00000006555	TTC22	55001	1	481.729	620.092	-0.362742	0.134594	-2.69509	0.00703702	0.0238305		522.32	436.31	486.56	562.38	650.4	647.5
ENSG00000006576	PHTF2	57157	7	815.547	669.215	0.283548	0.0893967	3.17179	0.001515	0.00626743		734.72	869.51	842.41	680.04	725.07	602.53
ENSG00000006606	CCL26	10344	7	260.915	129.336	1.01232	0.149912	6.75272	1.45101e-11	2.34929e-10		274.39	264.13	244.23	120.44	130.67	136.89
ENSG00000006607	FARP2	9855	2	1726.83	1676.24	0.0395166	0.0564237	0.700354	0.483706	0.66997		1597.18	1615.14	1968.17	1700.11	1687.9	1640.72
ENSG00000006611	USH1C	10083	11	0	0	0	0.913071	0	1	1		0	0	0	0	0	0
ENSG00000006625	GGCT	79017	7	1390.37	1011.02	0.459274	0.0749174	6.13041	8.76544e-10	1.14384e-08		1352.28	1395.43	1423.41	937.61	991.32	1104.14
ENSG00000006634	DBF4	10926	7	1967.2	1582.31	0.31244	0.0605944	5.15624	2.51951e-07	2.26648e-06		1872.33	1936.15	2093.14	1635.26	1577.86	1533.8
ENSG00000006638	TBXA2R	6915	19	22.673	32.362	-0.526035	0.245558	-2.1422	0.0321773	0.0854403		16.63	21.82	29.57	27.79	38.32	30.98
ENSG00000006652	IFRD1	3475	7	281.48	202.34	0.470704	0.129784	3.62683	0.000286923	0.00143423		275.9	268.02	300.52	230.7	198.46	177.86
ENSG00000006659	LGALS14	56891	19	0	0	0	0.648688	0	1			0	0	0	0	0	0
ENSG00000006695	COX10	1352	17	837.446	1097.15	-0.392256	0.0526655	-7.44805	9.47289e-14	1.94697e-12		807.28	832.11	872.94	1134.03	1108.24	1049.18
ENSG00000006704	GTF2IRD1	9569	7	1700.56	1815.68	-0.0927374	0.0527636	-1.7576	0.0788155	0.176467		1764.99	1732.01	1604.68	1773.3	1841.17	1832.57
ENSG00000006712	PAF1	54623	19	2408.28	2457.56	-0.0281391	0.0517767	-0.54347	0.586806	0.755915		2440.75	2458.17	2325.93	2300.48	2512.2	2560
ENSG00000006715	VPS41	27072	7	1090.16	888.705	0.291668	0.0600315	4.85858	1.18232e-06	9.58366e-06		1071.84	1026.12	1172.5	909.81	898.97	857.33
ENSG00000006740	ARHGAP44	9912	17	0	0	0	0.847889	0	1	1		0	0	0	0	0	0
ENSG00000006744	ELAC2	60528	17	3161.28	3154.22	0.00406695	0.0355918	0.114267	0.909027	0.974139		3196.63	3220.94	3066.26	3185.28	3091.86	3185.52
ENSG00000006747	SCIN	85477	7	858.456	568.429	0.595197	0.108024	5.50986	3.59128e-08	3.69465e-07		918.4	850.81	806.16	562.38	598.33	544.58
ENSG00000006756	ARSD	414	X	1503.25	1549.88	-0.0454006	0.0472042	-0.961791	0.336155	0.523394		1465.66	1484.25	1559.84	1537.05	1581.79	1530.81
ENSG00000006757	PNPLA4	8228	X	440.938	304.529	0.531475	0.0911214	5.83261	5.45679e-09	6.37191e-08		432.37	427.74	462.71	306.67	270.18	336.74
ENSG00000006788	MYH13	8735	17	0	0	0	0.648688	0	1			0	0	0	0	0	0
ENSG00000006831	ADIPOR2	79602	12	2564.88	2448.98	0.0656053	0.0503051	1.30415	0.192183	0.351493		2457.38	2504.91	2732.34	2399.61	2334.37	2612.96
ENSG00000006837	CDKL3	51265	5	35.961	53.001	-0.543376	0.276274	-1.9668	0.0492058	0.120353		37.79	40.51	29.57	50.96	51.09	56.96
ENSG00000007001	UPP2	151531	2	1.771	1.933	-0.0531605	1.04411	-0.0509147	0.959394			4.54	0.78	0	1.85	2.95	1
ENSG00000007038	PRSS21	10942	16	0	0	0	0.907387	0	1	1		0	0	0	0	0	0
ENSG00000007047	MARK4	57787	19	987.64	912.743	0.114325	0.0587414	1.94624	0.0516254	0.125065		983.41	994.95	984.56	865.34	976.58	896.3
ENSG00000007062	PROM1	8842	4	0.26	0	0.225825	0.965989	0.233776	0.815159			0	0.78	0	0	0	0
ENSG00000007080	CCDC124	115098	19	1139.25	975.7	0.223517	0.0662191	3.37541	0.000737057	0.00329781		1089.23	1182.72	1145.79	920.01	1016.87	990.23
ENSG00000007129	CEACAM21	90273	19	0	0	0	0.648688	0	1			0	0	0	0	0	0
ENSG00000007168	PAFAH1B1	5048	17	2607.34	2600.45	0.00207677	0.0457463	0.0453976	0.96379	1		2458.14	2557.12	2806.76	2585.84	2545.61	2669.92
ENSG00000007171	NOS2	4843	17	0	0	0	0.970317	0	1	1		0	0	0	0	0	0
ENSG00000007174	DNAH9	1770	17	0	0	0	1.03064	0	1			0	0	0	0	0	0
ENSG00000007202	KIAA0100	9703	17	8292.73	6720.93	0.302593	0.053899	5.61407	1.97627e-08	2.12034e-07		8234.6	7669.01	8974.57	6610.52	6987.4	6564.88
ENSG00000007216	SLC13A2	9058	17	0	0	0	1.03626	0	1			0	0	0	0	0	0
ENSG00000007237	GAS7	8522	17	0.519	0.327	0.0900897	0.82082	0.109756	0.912603	0.976324		0	1.56	0	0	0.98	0
ENSG00000007255	TRAPPC6A	79090	19	318.815	252.595	0.338122	0.09302	3.63494	0.000278045	0.00139768		318.23	344.38	293.84	257.56	257.41	242.81
ENSG00000007264	MATK	4145	19	0	0	0	0.997947	0	1	1		0	0	0	0	0	0
ENSG00000007306	CEACAM7	1087	19	0	0	0	1.02895	0	1			0	0	0	0	0	0
ENSG00000007312	CD79B	974	17	0	0	0	1.02969	0	1			0	0	0	0	0	0
ENSG00000007314	SCN4A	6329	17	48.076	41.364	0.221267	0.305416	0.724477	0.468773	0.655528		52.91	52.2	39.12	38.91	44.21	40.97
ENSG00000007341	ST7L	54879	1	512.615	559.845	-0.126629	0.0775084	-1.63375	0.102311	0.217081		497.37	532.93	507.54	561.45	530.54	587.54
ENSG00000007350	TKTL1	8277	X	1.551	2.253	-0.381758	0.917073	-0.416279	0.677206			0.76	3.9	0	2.78	0.98	3
ENSG00000007372	PAX6	5080	11	0	0	0	0.886356	0	1	1		0	0	0	0	0	0
ENSG00000007376	RPUSD1	113000	16	1386.06	1414.12	-0.0275487	0.0729371	-0.377705	0.70565	0.848		1411.99	1434.38	1311.79	1303.57	1461.93	1476.85
ENSG00000007384	RHBDF1	64285	16	1551.37	2073.44	-0.416187	0.0968753	-4.29611	1.73822e-05	0.000113413		1731.73	1635.4	1286.99	2111.47	2108.4	2000.44
ENSG00000007392	LUC7L	55692	16	1346.31	1485.98	-0.140487	0.0798757	-1.75883	0.0786072	0.176085		1468.68	1406.34	1163.92	1593.57	1372.52	1491.84
ENSG00000007402	CACNA2D2	9254	3	0.888	1.957	-0.798114	0.729556	-1.09397	0.273968	0.453751		0.76	0	1.91	0.93	2.95	2
ENSG00000007516	BAIAP3	8938	16	493.544	596.922	-0.270466	0.160393	-1.68627	0.0917444	0.199165		595.64	515.79	369.21	630.94	602.26	557.57
ENSG00000007520	TSR3	115939	16	1590.28	1610.24	-0.0173861	0.0888346	-0.195713	0.844835	0.937068		1626.66	1620.6	1523.59	1537.98	1623.06	1669.7
ENSG00000007541	PIGQ	9091	16	835.864	868.925	-0.0529394	0.104232	-0.507901	0.611523	0.775563		935.78	894.44	677.36	814.39	892.09	900.3
ENSG00000007545	CRAMP1	57585	16	557.037	545.107	0.029017	0.0780014	0.372005	0.709889	0.851349		532.9	535.26	602.95	504.94	570.82	559.56
ENSG00000007866	TEAD3	7005	6	1524.52	1455.13	0.0685343	0.0607055	1.12896	0.258913	0.436171		1594.92	1559.05	1419.6	1497.21	1442.28	1425.89
ENSG00000007908	SELE	6401	1	1.082	0	1.27193	1.04204	1.22061	0.222234			1.51	0.78	0.95	0	0	0
ENSG00000007923	DNAJC11	55735	1	2146.83	2217.88	-0.0443878	0.0508485	-0.872944	0.382694	0.572393		2287.31	2247.02	1906.15	2219.87	2156.54	2277.23
ENSG00000007933	FMO3	2328	1	0	0.309	-0.159366	0.710913	-0.224171	0.822624			0	0	0	0.93	0	0
ENSG00000007944	MYLIP	29116	6	956.323	960.594	-0.00661204	0.0720443	-0.0917774	0.926875	0.98528		951.66	957.55	959.76	966.33	1000.16	915.29
ENSG00000007952	NOX1	27035	X	3.311	2.951	0.156696	0.707664	0.221427	0.82476			3.78	2.34	3.82	0.93	3.93	4
ENSG00000007968	E2F2	1870	1	423.384	338.402	0.326458	0.0856946	3.80955	0.000139217	0.000749616		463.36	405.15	401.65	308.52	337.97	368.71
ENSG00000008018	PSMB1	5689	6	5487.77	4780.77	0.199197	0.0535246	3.72159	0.000197972	0.00102964		5518.71	5567.69	5376.92	4534.25	4709.03	5099.03
ENSG00000008056	SYN1	6853	X	1.283	0.999	0.268684	0.855408	0.314101	0.753445			1.51	2.34	0	0	0	3
ENSG00000008083	JARID2	3720	6	2184.91	2343.89	-0.103359	0.0631764	-1.63604	0.101831	0.21643		2056.01	2003.93	2494.79	2394.98	2386.44	2250.25
ENSG00000008086	CDKL5	6792	X	323.952	262.565	0.292448	0.12714	2.30021	0.0214363	0.0606625		262.29	268.8	440.76	264.98	285.9	236.82
ENSG00000008118	CAMK1G	57172	1	0.519	1.63	-1.04188	0.950961	-1.09561	0.273249			0	1.56	0	0.93	1.96	2
ENSG00000008128	CDK11A	728642	1	124.704	132.34	-0.079588	0.221986	-0.358527	0.719949	0.859264		142.11	139.46	92.54	135.27	119.86	141.89
ENSG00000008130	NADK	65220	1	1500.69	1427.6	0.0746274	0.0602055	1.23954	0.215144	0.382344		1612.3	1551.25	1338.51	1398.08	1467.82	1416.9
ENSG00000008196	TFAP2B	7021	6	4.148	2.272	0.568193	1.01472	0.559949	0.575514			3.78	3.9	4.77	1.85	1.96	3
ENSG00000008197	TFAP2D	83741	6	4.125	6.732	-0.512186	1.04498	-0.490142	0.624034			6.05	1.56	4.77	8.34	7.86	4
ENSG00000008226	DLEC1	9940	3	3.757	5.478	-0.467696	0.788811	-0.592913	0.55324			5.29	3.12	2.86	5.56	6.88	4
ENSG00000008256	CYTH3	9265	7	1276.93	1287.28	-0.00913058	0.0485047	-0.188241	0.850688	0.939743		1355.3	1250.51	1224.98	1235.94	1293.93	1331.96
ENSG00000008277	ADAM22	53616	7	237.021	194.906	0.280904	0.121644	2.30923	0.0209308	0.0595191		243.39	224.39	243.28	195.49	203.37	185.86
ENSG00000008282	SYPL1	6856	7	3637.35	2627.17	0.468125	0.0495348	9.45043	3.37452e-21	1.24162e-19		3471.02	3614.4	3826.62	2703.5	2635.99	2542.02
ENSG00000008283	CYB561	1534	17	5086.11	5708.42	-0.166081	0.0361621	-4.59269	4.37569e-06	3.22125e-05		5164.96	5079.95	5013.43	5651.6	5535.29	5938.37
ENSG00000008294	SPAG9	9043	17	4395.28	4755.83	-0.11508	0.04982	-2.30991	0.020893	0.0594386		4174.75	4078.76	4932.34	4788.11	4763.06	4716.32
ENSG00000008300	CELSR3	1951	3	389.757	608.53	-0.642193	0.0776227	-8.27326	1.3034e-16	3.43516e-15		393.82	374.76	400.69	567.01	671.03	587.54
ENSG00000008311	AASS	10157	7	424.174	329.163	0.36521	0.137691	2.65239	0.00799243	0.0264232		422.54	408.27	441.72	327.05	354.68	305.76
ENSG00000008323	PLEKHG6	55200	12	378.504	349.234	0.117226	0.153662	0.762882	0.445534	0.632935		359.8	424.63	351.08	332.61	372.36	342.73
ENSG00000008324	SS18L2	51188	3	537.644	507.334	0.0841377	0.0836922	1.00532	0.314741	0.50066		545.75	532.93	534.26	507.72	464.71	549.57
ENSG00000008382	MPND	84954	19	318.49	210.352	0.597594	0.116036	5.1501	2.60354e-07	2.33758e-06		340.15	297.63	317.69	196.42	235.8	198.85
ENSG00000008394	MGST1	4257	12	2796.14	2087.56	0.420988	0.0641374	6.56384	5.24397e-11	8.01328e-10		2755.2	2768.26	2864.96	2057.74	2039.63	2165.31
ENSG00000008405	CRY1	1407	12	604.495	645.003	-0.093521	0.0604333	-1.54751	0.121741	0.24907		601.68	606.94	604.86	644.84	634.68	655.49
ENSG00000008438	PGLYRP1	8993	19	0	0							0	0	0	0	0	0
ENSG00000008441	NFIX	4784	19	151.481	234.332	-0.633938	0.0960265	-6.60169	4.06494e-11	6.30401e-10		143.62	149.59	161.23	247.37	235.8	219.83
ENSG00000008513	ST3GAL1	6482	8	11.989	22.502	-0.917396	0.270843	-3.38719	0.000706135	0.00318219		8.31	8.57	19.08	25.94	23.58	17.99
ENSG00000008516	MMP25	64386	16	7.358	12.675	-0.727056	0.409899	-1.77374	0.0761057	0.171621		6.05	9.35	6.68	9.26	12.77	15.99
ENSG00000008517	IL32	9235	16	117.328	322.761	-1.45785	0.111051	-13.1277	2.28596e-39	2.13413e-37		120.19	110.64	121.16	310.37	327.17	330.74
ENSG00000008710	PKD1	5310	16	2217.36	2497.26	-0.171716	0.0727559	-2.36016	0.0182669	0.0533211		2179.21	2148.85	2324.02	2390.35	2731.29	2370.15
ENSG00000008735	MAPK8IP2	23542	22	16.972	96.493	-2.42799	0.20763	-11.6939	1.37024e-31	9.66639e-30		14.36	24.15	12.4	93.58	113.97	81.94
ENSG00000008838	MED24	9862	17	2800.53	2727.49	0.0389714	0.037122	1.04982	0.293801	0.476661		2868.58	2793.97	2739.02	2695.16	2780.42	2706.89
ENSG00000008853	RHOBTB2	23221	8	1243.08	1162	0.0974705	0.0585937	1.6635	0.0962127	0.206831		1235.11	1248.17	1245.96	1117.35	1202.56	1166.09
ENSG00000008869	HEATR5B	54497	2	1117.12	994.022	0.164674	0.0768239	2.14352	0.032071	0.0852063		1039.34	1001.19	1310.84	1030.26	977.57	974.24
ENSG00000008952	SEC62	7095	3	2144.91	2043.77	0.0682691	0.0627895	1.08727	0.276918	0.457024		1960.76	2109.89	2364.09	1950.26	2092.68	2088.37
ENSG00000008988	RPS20	6224	8	17567.7	12963.2	0.438422	0.0483881	9.06054	1.29802e-19	4.29584e-18		17721	17957.5	17024.7	12592.9	12485.4	13811.2
ENSG00000009307	CSDE1	7812	1	16449	12561.4	0.388684	0.0428409	9.07275	1.16056e-19	3.85448e-18		16166.1	16015.1	17165.9	12439.1	12319.3	12925.9
ENSG00000009335	UBE3C	9690	7	5012.08	5355.63	-0.0960808	0.0480398	-2.00002	0.0454977	0.112932		4771.14	5033.2	5231.91	5285.63	5531.36	5249.91
ENSG00000009413	REV3L	5980	6	838.564	791.251	0.080551	0.122876	0.655549	0.512114	0.695952		720.36	693.43	1101.91	744.9	872.44	756.41
ENSG00000009694	TENM1	10178	X	38.214	25.742	0.55111	0.459238	1.20005	0.230118	0.401391		27.97	30.39	56.29	29.65	22.6	24.98
ENSG00000009709	PAX7	5081	1	0.252	0	0.225624	0.924543	0.244039	0.807201	0.914681		0.76	0	0	0	0	0
ENSG00000009724	MASP2	10747	1	1.341	3.556	-1.12094	0.779609	-1.43782	0.150485			1.51	1.56	0.95	3.71	1.96	5
ENSG00000009765	IYD	389434	6	2.245	0.642	1.10521	1.04194	1.06072	0.288815			0.76	3.12	2.86	0.93	0	1
ENSG00000009780	FAM76A	199870	1	292.405	269.812	0.116631	0.12779	0.912674	0.361414	0.550348		290.26	300.75	286.21	261.27	258.39	289.77
ENSG00000009790	TRAF3IP3	80342	1	0.26	0	0.0972645	0.710184	0.136957	0.891065			0	0.78	0	0	0	0
ENSG00000009830	POMT2	29954	14	641.382	669.927	-0.0570784	0.0752777	-0.758237	0.448309	0.635357		730.18	639.67	554.29	624.46	679.88	705.45
ENSG00000009844	VTA1	51534	6	1398.82	1254.38	0.156032	0.0638983	2.44188	0.0146111	0.0441864		1343.96	1398.54	1453.94	1268.37	1247.75	1247.03
ENSG00000009950	MLXIPL	51085	7	186.11	184.621	0.0163473	0.199112	0.0821011	0.934566	0.989554		222.99	210.37	124.98	213.09	173.9	166.87
ENSG00000009954	BAZ1B	9031	7	5744.58	5827.28	-0.0213446	0.0680535	-0.313644	0.753791	0.882233		5241.3	5264.6	6727.83	5610.83	5966.6	5904.4
ENSG00000010017	RANBP9	10048	6	2400.95	2063.91	0.218087	0.042535	5.12722	2.94045e-07	2.61837e-06		2378.77	2407.52	2416.56	2043.84	2045.52	2102.36
ENSG00000010030	ETV7	51513	6	201.333	674.883	-1.73711	0.117633	-14.7672	2.38282e-49	3.21681e-47		204.84	223.61	175.54	678.19	673.98	672.48
ENSG00000010072	SPRTN	83932	1	406.817	364.274	0.159065	0.0767467	2.07259	0.0382101	0.098137		415.74	405.93	398.78	379.86	380.22	332.74
ENSG00000010165	EEF1AKNMT	51603	1	3038.12	3295.03	-0.116347	0.0481067	-2.41851	0.0155841	0.0466412		3087.79	3081.47	2945.09	3195.47	3351.24	3338.4
ENSG00000010219	DYRK4	8798	12	3.652	3.23	0.0518594	0.50292	0.103117	0.91787	0.979685		1.51	4.67	4.77	2.78	4.91	2
ENSG00000010244	ZNF207	7756	17	5816.91	5410.63	0.104944	0.0332391	3.15725	0.00159266	0.00653557		5882.29	5954.92	5613.52	5545.98	5263.14	5422.77
ENSG00000010256	UQCRC1	7384	3	6511.03	5911.71	0.139787	0.0431657	3.23839	0.00120207	0.0051199		6630.62	6642.11	6260.35	5694.22	6022.6	6018.31
ENSG00000010270	STARD3NL	83930	7	1080.56	700.373	0.624155	0.0604378	10.3272	5.30717e-25	2.59347e-23		1072.6	1055.73	1113.35	688.38	713.28	699.45
ENSG00000010278	CD9	928	12	4706.1	4693.57	0.00290253	0.0497797	0.0583076	0.953504	1		4492.22	4509.62	5116.47	4695.46	4775.83	4609.41
ENSG00000010282	HHATL	57467	3	0.318	0	0.149701	0.843772	0.177419	0.85918			0	0	0.95	0	0	0
ENSG00000010292	NCAPD2	9918	12	7796.32	5552.35	0.488728	0.0491123	9.95122	2.49113e-23	1.05521e-21		7394.06	7392.42	8602.5	5516.33	5664.98	5475.73
ENSG00000010295	IFFO1	25900	12	2.474	4.482	-0.732365	0.579414	-1.26397	0.206239	0.370839		3.78	0.78	2.86	6.49	1.96	5
ENSG00000010310	GIPR	2696	19	239.266	403.655	-0.74333	0.209404	-3.54974	0.000385612	0.00186495		294.79	270.36	152.64	442.86	369.41	398.69
ENSG00000010318	PHF7	51533	3	173.404	143.812	0.266653	0.130365	2.04543	0.0408126	0.103577		159.49	182.32	178.4	151.02	138.53	141.89
ENSG00000010319	SEMA3G	56920	3	33.372	36.766	-0.136348	0.30863	-0.441785	0.658645	0.812748		28.72	38.96	32.44	37.06	41.26	31.98
ENSG00000010322	NISCH	11188	3	2184.63	2299.21	-0.072818	0.0780849	-0.932548	0.351053	0.539518		2430.92	2169.11	1953.86	2457.98	2281.32	2158.32
ENSG00000010327	STAB1	23166	3	0.26	0.661	-0.530031	1.02541	-0.516895	0.605229			0	0.78	0	0	0.98	1
ENSG00000010361	FUZ	80199	19	337.605	370.621	-0.127029	0.0805692	-1.57664	0.114878	0.237672		340.9	368.53	303.38	323.35	402.82	385.7
ENSG00000010379	SLC6A13	6540	12	0.252	1.308	-1.12481	0.903764	-1.24459	0.213284	0.379902		0.76	0	0	0.93	0	3
ENSG00000010404	IDS	3423	X	1930.01	1545.84	0.318464	0.0704364	4.52131	6.14592e-06	4.38844e-05		1816.39	1818.5	2155.16	1492.58	1678.08	1466.86
ENSG00000010438	PRSS3	5646	9	0.318	0	0.220197	0.920073	0.239326	0.810853	0.917279		0	0	0.95	0	0	0
ENSG00000010539	ZNF200	7752	16	1162.78	1266.57	-0.121894	0.0587938	-2.07324	0.0381501	0.0980264		1244.19	1116.5	1127.66	1245.2	1260.52	1293.99
ENSG00000010610	CD4	920	12	0	0	0	1.03946	0	1			0	0	0	0	0	0
ENSG00000010626	LRRC23	10233	12	95.797	89.746	0.103977	0.135748	0.765953	0.443704	0.630957		112.63	92.72	82.05	89.87	87.44	91.93
ENSG00000010671	BTK	695	X	2.733	0.327	1.82188	0.870261	2.09348	0.0363062			3.78	1.56	2.86	0	0.98	0
ENSG00000010704	HFE	3077	6	315.865	247.805	0.344783	0.0813739	4.23703	2.26499e-05	0.000144961		307.64	298.41	341.54	237.18	256.43	249.81
ENSG00000010803	SCMH1	22955	1	878.001	950.863	-0.116037	0.0547982	-2.11754	0.0342143	0.0897443		868.51	885.87	879.62	1012.66	916.65	923.28
ENSG00000010810	FYN	2534	6	826.196	746.615	0.146144	0.0612265	2.38694	0.0169894	0.0501587		826.18	832.89	819.51	763.43	729	747.42
ENSG00000010818	HIVEP2	3097	6	1298.65	1362.79	-0.0710462	0.120417	-0.59	0.555191	0.732998		1131.56	1102.47	1661.92	1291.53	1464.88	1331.96
ENSG00000010932	FMO1	2326	1	0	0	0	0.648688	0	1			0	0	0	0	0	0
ENSG00000011007	ELOA	6924	1	3535.4	4496.48	-0.347341	0.044048	-7.88551	3.1326e-15	7.51703e-14		3517.13	3431.3	3657.75	4542.59	4232.52	4714.33
ENSG00000011009	LYPLA2	11313	1	5395.32	5285.85	0.0300526	0.0481402	0.624272	0.532449	0.714178		5471.09	5464.84	5250.03	4949.32	5468.48	5439.76
ENSG00000011021	CLCN6	1185	1	792.751	751.864	0.078285	0.0953574	0.820963	0.411667	0.600508		891.94	790.82	695.49	777.33	737.84	740.42
ENSG00000011028	MRC2	9902	17	631.015	492.417	0.359119	0.0780969	4.59838	4.25798e-06	3.13953e-05		612.27	686.42	594.36	461.39	548.22	467.64
ENSG00000011052	NME1-NME2	654364	17	5.365	5.841	-0.0959408	0.543431	-0.176546	0.859865	0.945025		6.05	6.23	3.82	4.63	5.89	6.99
ENSG00000011083	SLC6A7	6534	5	0.26	0.333	-0.154099	1.00075	-0.153983	0.877623			0	0.78	0	0	0	1
ENSG00000011105	TSPAN9	10867	12	28.685	23.014	0.31673	0.223924	1.41445	0.157229	0.303353		29.48	32.72	23.85	20.38	17.68	30.98
ENSG00000011114	BTBD7	55727	14	1711.7	1401.57	0.285901	0.0882856	3.23837	0.00120215	0.0051199		1556.37	1503.73	2075.02	1399.93	1409.86	1394.91
ENSG00000011132	APBA3	9546	19	519.143	592.52	-0.187067	0.0903832	-2.06972	0.038479	0.0986732		550.28	545.39	461.75	582.76	602.26	592.54
ENSG00000011143	MKS1	54903	17	650.004	663.3	-0.0260248	0.0711147	-0.365956	0.714398	0.854899		696.17	666.16	587.68	697.65	629.77	662.48
ENSG00000011198	ABHD5	51099	3	1290.17	1347.13	-0.0629443	0.0641396	-0.981364	0.326413	0.512875		1274.42	1269.99	1326.1	1374.91	1256.59	1409.9
ENSG00000011201	ANOS1	3730	X	85.15	70.045	0.282019	0.252991	1.11474	0.264963	0.442891		76.34	90.38	88.72	57.44	69.76	82.94
ENSG00000011243	AKAP8L	26993	19	1257.84	1451.22	-0.204821	0.0729131	-2.80911	0.00496779	0.0175921		1294.83	1304.27	1174.41	1452.74	1396.1	1504.83
ENSG00000011258	MBTD1	54799	17	653.135	523.282	0.318136	0.0848903	3.74761	0.000178525	0.000939963		632.68	647.46	679.27	519.76	533.49	516.6
ENSG00000011260	UTP18	51096	17	1992.91	2004.54	-0.00884685	0.050301	-0.175878	0.86039	0.945325		1974.37	1949.39	2054.98	1935.44	2031.77	2046.4
ENSG00000011275	RNF216	54476	7	1569.61	1773.68	-0.176673	0.0420335	-4.20316	2.63217e-05	0.000166001		1583.58	1534.89	1590.37	1757.55	1801.87	1761.63
ENSG00000011295	TTC19	54902	17	1322.79	1237.56	0.0948619	0.049023	1.93505	0.0529841	0.127779		1293.32	1305.05	1369.99	1221.12	1201.57	1289.99
ENSG00000011304	PTBP1	5725	19	11971.2	10667	0.16683	0.0348313	4.78966	1.67067e-06	1.32447e-05		12090.4	12486.4	11336.8	10575.9	10751.3	10673.7
ENSG00000011332	DPF1	8193	19	212.879	231.537	-0.115838	0.104733	-1.10602	0.268716	0.447659		225.25	219.72	193.67	228.84	226.95	238.81
ENSG00000011347	SYT7	9066	11	1630.26	1792.1	-0.1364	0.0747868	-1.82385	0.0681752	0.156816		1616.08	1621.38	1653.34	1711.23	1939.42	1725.65
ENSG00000011376	LARS2	23395	3	1226.03	1303.29	-0.0889846	0.0570097	-1.56087	0.118555	0.2438		1234.36	1162.47	1281.26	1265.59	1270.35	1373.93
ENSG00000011405	PIK3C2A	5286	11	1366.39	988.834	0.463359	0.0988835	4.68591	2.7872e-06	2.11748e-05		1182.2	1230.25	1686.73	936.68	1090.55	939.27
ENSG00000011422	PLAUR	5329	19	2617.22	6062.04	-1.211	0.0604593	-20.03	3.01509e-89	9.58951e-87		2559.42	2655.29	2636.94	6458.57	5647.29	6080.26
ENSG00000011426	ANLN	54443	7	8700.42	6486.66	0.422749	0.0548034	7.71392	1.22008e-14	2.70305e-13		8124.24	8346.08	9630.94	6642.94	6332.08	6484.95
ENSG00000011451	WIZ	58525	19	2095.6	2042.1	0.0379627	0.0568379	0.667913	0.504189	0.689365		2142.93	2080.29	2063.57	1903.01	2194.86	2028.42
ENSG00000011454	RABGAP1	23637	9	3948.29	3424.82	0.20456	0.0368699	5.54816	2.88694e-08	3.01633e-07		3909.43	3915.14	4020.29	3464.15	3481.91	3328.41
ENSG00000011465	DCN	1634	12	0	0.661	-0.884568	1.03304	-0.856281	0.391843			0	0	0	0	0.98	1
ENSG00000011478	QPCTL	54814	19	560.715	524.532	0.0996539	0.0683114	1.45882	0.144615	0.284485		572.2	580.45	529.49	496.6	537.42	539.58
ENSG00000011485	PPP5C	5536	19	3125.75	3095.33	0.0157818	0.0409796	0.385114	0.700153	0.843935		3244.26	3210.81	2922.2	3062.05	3062.39	3161.54
ENSG00000011523	CEP68	23177	2	1080.6	1124.73	-0.0601831	0.064485	-0.933289	0.350671	0.539127		1027.25	1040.14	1174.41	1118.28	1191.75	1064.17
ENSG00000011566	MAP4K3	8491	2	1292.82	1519.23	-0.233673	0.0621196	-3.76167	0.000168783	0.000893178		1315.24	1229.47	1333.74	1575.04	1583.76	1398.91
ENSG00000011590	ZBTB32	27033	19	0.83	9.34	-3.01954	0.686703	-4.39715	1.09681e-05	7.43018e-05		0.76	0.78	0.95	11.12	4.91	11.99
ENSG00000011600	TYROBP	7305	19	0	0	0	0.955103	0	1			0	0	0	0	0	0
ENSG00000011638	TMEM159	57146	16	869.938	1201.06	-0.467546	0.0793622	-5.89129	3.83188e-09	4.54234e-08		847.35	784.59	977.88	1243.35	1192.73	1167.09
ENSG00000011677	GABRA3	2556	X	627.652	568.455	0.143651	0.102196	1.40565	0.159829	0.307043		603.2	673.95	605.81	553.12	577.7	574.55
ENSG00000012048	BRCA1	672	17	2393.52	2185.82	0.129403	0.0653557	1.97998	0.0477063	0.117358		2229.1	2282.08	2669.38	2167.06	2238.09	2152.32
ENSG00000012061	ERCC1	2067	19	1316.92	1493.84	-0.17987	0.051434	-3.49709	0.000470361	0.00223056		1337.16	1370.5	1243.1	1509.25	1432.46	1539.8
ENSG00000012124	CD22	933	19	340.152	619.536	-0.862574	0.124608	-6.92231	4.44348e-12	7.65674e-11		353	337.36	330.09	682.82	545.28	630.51
ENSG00000012171	SEMA3B	7869	3	1323.34	2567.59	-0.951642	0.131709	-7.22536	4.9978e-13	9.63861e-12		1446.76	1449.97	1073.28	2683.12	2547.57	2472.07
ENSG00000012174	MBTPS2	51360	X	1496.7	1484.86	0.00855741	0.0575726	0.148637	0.88184	0.958136		1400.65	1443.73	1645.7	1537.98	1473.72	1442.88
ENSG00000012211	PRICKLE3	4007	X	1119.87	1170.01	-0.0622076	0.0825672	-0.753417	0.451199	0.638085		1169.35	1139.87	1050.39	1197.95	1179.96	1132.12
ENSG00000012223	LTF	4057	3	4.207	4.533	-0.0784912	0.980061	-0.0800881	0.936167			3.78	3.12	5.72	3.71	5.89	4
ENSG00000012232	EXTL3	2137	8	3764.35	4440.69	-0.239182	0.0470526	-5.08328	3.70967e-07	3.25289e-06		3692.49	3587.91	4012.65	4388.79	4559.69	4373.59
ENSG00000012504	NR1H4	9971	12	4.098	5.719	-0.432807	0.667825	-0.648085	0.51693			3.02	5.45	3.82	9.26	5.89	2
ENSG00000012660	ELOVL5	60481	6	5112.63	3774.02	0.437447	0.0508641	8.6003	7.9505e-18	2.32024e-16		4883.77	5245.12	5209.01	3792.13	3822.83	3707.11
ENSG00000012779	ALOX5	240	10	0	0	0	1.02853	0	1			0	0	0	0	0	0
ENSG00000012817	KDM5D	8284	Y	839.21	827.359	0.02196	0.0708204	0.31008	0.7565	0.883863		894.21	843.02	780.4	890.36	823.32	768.4
ENSG00000012822	CALCOCO1	57658	12	659.846	655.261	0.0143056	0.101876	0.140421	0.888327	0.961496		792.92	672.39	514.22	644.84	646.47	674.47
ENSG00000012963	UBR7	55148	14	2686.13	2493.35	0.107025	0.0437735	2.44497	0.0144863	0.0438585		2658.45	2659.96	2739.98	2465.39	2487.64	2527.03
ENSG00000012983	MAP4K5	11183	14	2568.03	2499.82	0.0385233	0.0667819	0.576852	0.56404	0.739256		2599.49	2568.8	2535.81	2748.9	2506.31	2244.25
ENSG00000013016	EHD3	30845	2	822.411	956.685	-0.217008	0.0599509	-3.61976	0.000294873	0.00147045		823.16	836.01	808.06	926.49	992.3	951.26
ENSG00000013275	PSMC4	5704	19	4527.92	4773.19	-0.0754027	0.0438209	-1.7207	0.0853053	0.18786		4614.67	4571.95	4397.13	4581.5	4593.09	5144.99
ENSG00000013288	MAN2B2	23324	4	2448.24	2564.65	-0.065996	0.0528701	-1.24827	0.211933	0.378286		2505.76	2528.29	2310.66	2541.37	2721.47	2431.11
ENSG00000013293	SLC7A14	57709	3	0	0	0	0.648688	0	1			0	0	0	0	0	0
ENSG00000013297	CLDN11	5010	3	22.587	20.996	0.103766	0.480137	0.216118	0.828896	0.927172		21.92	21.04	24.8	19.46	25.54	17.99
ENSG00000013306	SLC25A39	51629	17	5186.35	4698.24	0.142885	0.0586673	2.43552	0.0148706	0.0448267		5334.28	5310.57	4914.21	4687.12	4518.42	4889.19
ENSG00000013364	MVP	9961	16	5782.82	6681.18	-0.207962	0.0561084	-3.70644	0.000210196	0.00108748		5828.62	5920.63	5599.21	6599.4	6942.2	6501.93
ENSG00000013374	NUB1	51667	7	3003.44	4061.01	-0.435518	0.0385802	-11.2886	1.49347e-29	9.46791e-28		2929.05	3041.74	3039.54	4094.17	4037.01	4051.84
ENSG00000013375	PGM3	5238	6	1129.18	1014.1	0.155897	0.0574292	2.7146	0.00663564	0.0226602		1152.72	1145.33	1089.5	1020.99	1062.06	959.25
ENSG00000013392	RWDD2A	112611	6	95.126	79.998	0.252647	0.154663	1.63353	0.102359	0.217158		82.39	119.99	83	82.46	78.6	78.94
ENSG00000013441	CLK1	1195	2	704.67	951.336	-0.430552	0.0737708	-5.83635	5.33572e-09	6.23442e-08		755.13	708.23	650.65	1030.26	869.49	954.26
ENSG00000013503	POLR3B	55703	12	635.842	626.689	0.0173584	0.0658336	0.263671	0.792033	0.906471		599.42	632.66	675.45	658.74	569.84	651.49
ENSG00000013523	ANGEL1	23357	14	1523.61	1776.32	-0.223351	0.0468744	-4.76488	1.88969e-06	1.48369e-05		1514.04	1461.65	1595.14	1850.2	1732.11	1746.64
ENSG00000013561	RNF14	9604	5	1198.83	1313.88	-0.133735	0.0620492	-2.15531	0.0311374	0.0831142		1148.19	1180.39	1267.91	1333.22	1264.45	1343.95
ENSG00000013563	DNASE1L1	1774	X	830.014	1028.49	-0.308674	0.0561845	-5.49394	3.93066e-08	4.01299e-07		822.4	850.03	817.6	1033.96	1049.29	1002.22
ENSG00000013573	DDX11	1663	12	3988.86	4230.17	-0.0838825	0.101495	-0.826472	0.408536	0.597102		4653.22	4268.09	3045.27	4547.22	4067.47	4075.82
ENSG00000013583	HEBP1	50865	12	278.66	262.641	0.0820311	0.0795658	1.03098	0.302548	0.486655		274.39	273.48	288.12	268.68	255.44	263.79
ENSG00000013588	GPRC5A	9052	12	7622.84	10182.3	-0.417911	0.0530938	-7.87119	3.5129e-15	8.33369e-14		7288.24	7242.04	8338.23	10051.5	10175.5	10320
ENSG00000013619	MAMLD1	10046	X	295.022	450.552	-0.615578	0.105178	-5.85273	4.83559e-09	5.66769e-08		277.41	268.02	339.64	491.97	448.01	411.68
ENSG00000013725	CD6	923	11	0	0.327	-0.671398	1.02135	-0.657366	0.510946			0	0	0	0	0.98	0
ENSG00000013810	TACC3	10460	4	11073.5	8909.56	0.313708	0.0307128	10.2142	1.71222e-24	8.07282e-23		10841.6	11316.9	11062	8767.39	8838.39	9122.89
ENSG00000014123	UFL1	23376	6	935.563	849.918	0.134658	0.0721303	1.86687	0.0619203	0.145236		856.42	908.47	1041.8	903.33	838.06	808.37
ENSG00000014138	POLA2	23649	11	539.247	498.583	0.114067	0.0834792	1.36642	0.171808	0.323639		563.13	533.71	520.9	503.08	502.05	490.62
ENSG00000014164	ZC3H3	23144	8	1535.33	1616.3	-0.0738314	0.0578987	-1.27518	0.202245	0.365408		1523.11	1570.73	1512.14	1617.65	1656.46	1574.77
ENSG00000014216	CAPN1	823	11	11232.8	11681.2	-0.0563126	0.0362864	-1.55189	0.120688	0.247429		11214.3	11387.8	11096.3	11427.4	12038.3	11578
ENSG00000014257	ACP3	55	3	120.152	82.346	0.543657	0.246705	2.20367	0.0275474	0.0751674		133.79	120.77	105.9	95.43	74.67	76.94
ENSG00000014641	MDH1	4190	2	5064.27	4141.74	0.290223	0.0411937	7.04534	1.85014e-12	3.31911e-11		5041.75	5120.46	5030.61	4075.64	4040.94	4308.64
ENSG00000014824	SLC30A9	10463	4	3536.07	2662.57	0.408601	0.0523056	7.8118	5.63781e-15	1.29967e-13		3373.51	3555.96	3678.74	2604.37	2783.37	2599.97
ENSG00000014914	MTMR11	10903	1	1275.65	1762.04	-0.463487	0.121222	-3.82346	0.000131591	0.000714289		1429.38	1351.02	1046.57	1998.44	1627.97	1659.71
ENSG00000014919	COX15	1355	10	705.738	715.948	-0.0251094	0.0605681	-0.414565	0.67846	0.827263		646.28	710.57	760.36	734.71	689.7	723.44
ENSG00000015133	CCDC88C	440193	14	3646.06	3709.81	-0.0255639	0.0668899	-0.382179	0.702329	0.845594		3499.74	3460.13	3978.31	3519.74	4068.45	3541.24
ENSG00000015153	YAF2	10138	12	294.33	325.101	-0.147293	0.0998367	-1.47534	0.140121	0.278064		273.63	285.94	323.42	318.71	345.83	310.76
ENSG00000015171	ZMYND11	10771	10	1736.15	1423.08	0.285433	0.0521066	5.47786	4.3049e-08	4.36893e-07		1684.87	1736.69	1786.9	1467.56	1415.75	1385.92
ENSG00000015285	WAS	7454	X	35.996	37.926	-0.0645505	0.294073	-0.219505	0.826256	0.925816		40.06	37.4	30.53	29.65	47.16	36.97
ENSG00000015413	DPEP1	1800	16	1.326	1.619	-0.20747	0.722942	-0.28698	0.774128	0.895317		3.02	0	0.95	0.93	3.93	0
ENSG00000015475	BID	637	22	1315.03	1359.85	-0.0475486	0.0568302	-0.836678	0.402773	0.591568		1297.1	1344.78	1303.21	1282.26	1379.4	1417.89
ENSG00000015479	MATR3	9782	5	105.34	108.175	-0.0401262	0.152897	-0.26244	0.792982	0.907004		114.89	94.28	106.85	120.44	103.16	100.92
ENSG00000015520	NPC1L1	29881	7	3.229	5.792	-0.742359	0.667953	-1.1114	0.266398			6.05	0.78	2.86	6.49	5.89	5
ENSG00000015532	XYLT2	64132	17	1534.5	1718.94	-0.162959	0.058772	-2.77273	0.00555888	0.0193889		1548.05	1582.42	1473.02	1758.48	1760.6	1637.72
ENSG00000015568	RGPD5	84220	2	20.807	23.619	-0.164309	0.261389	-0.628598	0.529612	0.712057		23.43	21.82	17.17	20.38	28.49	21.98
ENSG00000015592	STMN4	81551	8	0	0	0	0.834895	0	1			0	0	0	0	0	0
ENSG00000015676	NUDCD3	23386	7	2054.21	2139.81	-0.05897	0.0450133	-1.31006	0.190177	0.348775		2052.23	2059.25	2051.17	2154.09	2188.97	2076.38
ENSG00000016082	ISL1	3670	5	33.106	24.577	0.421581	0.525886	0.801657	0.422751	0.610424		32.5	29.61	37.21	21.31	31.44	20.98
ENSG00000016391	CHDH	55349	3	410.191	357.732	0.197983	0.0795159	2.48986	0.0127794	0.0394481		419.52	398.92	412.14	340.95	362.54	369.71
ENSG00000016402	IL20RA	53832	6	146.354	111.597	0.391287	0.217366	1.80012	0.0718412	0.163664		139.08	151.15	148.83	99.13	126.74	108.92
ENSG00000016490	CLCA1	1179	1	0	0	0	0.648688	0	1			0	0	0	0	0	0
ENSG00000016602	CLCA4	22802	1	0.512	0	0.182729	0.648688	0.28169	0.778181			0.76	0.78	0	0	0	0
ENSG00000016864	GLT8D1	55830	3	1603.91	1545.43	0.0541363	0.0539786	1.00292	0.315899	0.501779		1661.43	1593.33	1556.98	1613.95	1424.6	1597.75
ENSG00000017260	ATP2C1	27032	3	3550.61	3129.25	0.181613	0.0414339	4.3832	1.16947e-05	7.89111e-05		3495.96	3507.66	3648.21	3127.84	3119.37	3140.55
ENSG00000017427	IGF1	3479	12	6.118	3.537	0.707376	0.77472	0.913073	0.361204			6.05	4.67	7.63	4.63	0.98	5
ENSG00000017483	SLC38A5	92745	X	11.797	11.53	0.0416156	0.406113	0.102473	0.918381	0.980063		15.12	11.69	8.59	14.82	12.77	6.99
ENSG00000017797	RALBP1	10928	18	6722.9	5128.06	0.389791	0.0515466	7.56192	3.97166e-14	8.4499e-13		6237.56	6607.05	7324.1	5112.38	5230.72	5041.07
ENSG00000018189	RUFY3	22902	4	924.312	892.096	0.0483657	0.0790694	0.611687	0.540745	0.721134		862.46	903.02	1007.46	968.18	912.72	795.38
ENSG00000018236	CNTN1	1272	12	374.425	343.455	0.122158	0.0798672	1.52952	0.126137	0.255776		349.22	381	393.06	325.2	368.43	336.74
ENSG00000018280	SLC11A1	6556	2	30.511	29.419	0.0606146	0.316765	0.191355	0.848247	0.938523		40.06	25.71	25.76	28.72	24.56	34.97
ENSG00000018408	WWTR1	25937	3	6676.8	6340.59	0.0740304	0.0371116	1.99481	0.0460641	0.114126		6458.28	6629.64	6942.48	6226.02	6467.66	6328.07
ENSG00000018510	AGPS	8540	2	2279.87	1783.87	0.353002	0.050477	6.99333	2.68444e-12	4.72554e-11		2235.91	2258.71	2345.01	1796.47	1763.55	1791.6
ENSG00000018607	ZNF806	646915	2	0.26	0	0.154725	0.854094	0.181157	0.856244			0	0.78	0	0	0	0
ENSG00000018610	CXorf56	63932	X	815.335	677.704	0.26495	0.0744398	3.55926	0.000371908	0.00180472		774.03	800.95	871.03	650.4	657.28	725.43
ENSG00000018625	ATP1A2	477	1	2.054	3.266	-0.493677	0.705976	-0.699283	0.484375	0.670599		2.27	3.9	0	1.85	2.95	5
ENSG00000018699	TTC27	55622	2	1093.56	1169.14	-0.0990306	0.0573107	-1.72796	0.0839953	0.18565		1074.87	1023.78	1182.04	1170.16	1167.19	1170.09
ENSG00000018869	ZNF582	147948	19	323.671	377.226	-0.219854	0.122323	-1.79731	0.0722857	0.164537		312.94	345.16	312.92	397.46	364.5	369.71
ENSG00000019102	VSIG2	23584	11	1.904	2.57	-0.281389	1.04491	-0.269294	0.787703			3.02	0.78	1.91	2.78	3.93	1
ENSG00000019144	PHLDB1	23187	11	3108.87	2949.28	0.076369	0.0660815	1.15568	0.247812	0.423399		3087.79	3300.41	2938.42	2957.36	3161.62	2728.87
ENSG00000019169	MARCO	8685	2	0	0.309	-0.517946	1.03715	-0.499393	0.617502			0	0	0	0.93	0	0
ENSG00000019186	CYP24A1	1591	20	96.249	50.079	0.911238	0.139915	6.51282	7.37517e-11	1.10539e-09		100.53	88.04	100.17	62.07	45.19	42.97
ENSG00000019485	PRDM11	56981	11	161.804	160.427	0.00341681	0.11659	0.0293062	0.97662	1		148.91	145.7	190.81	148.24	158.18	174.86
ENSG00000019505	SYT13	57586	11	2.497	1.649	0.346958	0.613832	0.565233	0.571915	0.744398		1.51	3.12	2.86	0	2.95	2
ENSG00000019549	SNAI2	6591	8	745.169	1625.59	-1.12432	0.0971538	-11.5726	5.67292e-31	3.87099e-29		715.82	752.64	767.04	1699.19	1462.91	1714.66
ENSG00000019582	CD74	972	5	42.061	58.748	-0.478212	0.206711	-2.31344	0.0206986	0.0589749		43.09	42.07	41.02	57.44	64.84	53.96
ENSG00000019991	HGF	3082	7	0.318	0	0.412819	1.02147	0.404143	0.686108			0	0	0.95	0	0	0
ENSG00000019995	ZRANB1	54764	10	708.112	669.326	0.0798713	0.0740047	1.07927	0.280466	0.46146		656.11	718.36	749.87	630.94	638.61	738.42
ENSG00000020129	NCDN	23154	1	1815.84	2202.96	-0.277469	0.0682086	-4.06794	4.74298e-05	0.000283898		1877.62	1883.17	1686.73	2187.45	2235.14	2186.3
ENSG00000020181	ADGRA2	25960	8	12.96	30.411	-1.17029	0.273244	-4.28295	1.8443e-05	0.000119752		14.36	14.02	10.49	26.87	34.39	29.98
ENSG00000020219	CCT8L1P		7	0	0.642	-0.232764	0.648688	-0.358823	0.719728			0	0	0	0.93	0	1
ENSG00000020256	ZFP64	55734	20	1591.47	1633.74	-0.0378081	0.0489551	-0.772301	0.439936	0.627168		1599.45	1585.54	1589.42	1625.07	1718.36	1557.79
ENSG00000020426	MNAT1	4331	14	1002.88	910.495	0.138735	0.0816201	1.69976	0.0891758	0.194647		969.04	1003.52	1036.08	896.84	875.39	959.25
ENSG00000020577	SAMD4A	23034	14	935.841	1307.78	-0.484066	0.0548794	-8.82054	1.13912e-18	3.57453e-17		953.93	892.89	960.71	1389.74	1256.59	1277
ENSG00000020633	RUNX3	864	1	8.32	9.325	-0.187857	0.351429	-0.534551	0.59296	0.760618		5.29	10.13	9.54	10.19	11.79	6
ENSG00000020922	MRE11	4361	11	1606.17	1327.9	0.273051	0.060718	4.49703	6.89099e-06	4.86308e-05		1544.27	1589.43	1684.82	1339.71	1346	1297.99
ENSG00000021300	PLEKHB1	58473	11	502.389	309.443	0.698968	0.147318	4.74462	2.08895e-06	1.63058e-05		520.8	527.47	458.89	254.79	347.8	325.75
ENSG00000021355	SERPINB1	1992	6	5237.54	5648.02	-0.108824	0.0471389	-2.30858	0.0209669	0.0596122		5101.46	5412.64	5198.52	5764.63	5561.82	5617.62
ENSG00000021461	CYP3A43	64816	7	4.268	6.743	-0.510409	1.01801	-0.501378	0.616105			6.05	3.9	2.86	8.34	5.89	6
ENSG00000021488	SLC7A9	11136	19	0.504	0.975	-0.498324	0.933413	-0.533873	0.593429			1.51	0	0	0.93	0	2
ENSG00000021574	SPAST	6683	2	685.024	557.71	0.292502	0.0754374	3.87741	0.000105575	0.000585265		643.26	646.68	765.13	544.78	572.79	555.57
ENSG00000021645	NRXN3	9369	14	0.252	0.309	-0.16955	0.941348	-0.180114	0.857063	0.943553		0.76	0	0	0.93	0	0
ENSG00000021762	OSBPL5	114879	11	1009.02	1228.78	-0.282153	0.0611561	-4.61365	3.95651e-06	2.9357e-05		1031.78	1047.93	947.35	1229.45	1242.84	1214.05
ENSG00000021776	AQR	9716	15	2485.88	2294.48	0.113526	0.0562436	2.01848	0.0435418	0.108898		2300.16	2363.11	2794.36	2281.02	2287.21	2315.2
ENSG00000021826	CPS1	1373	2	536.371	333.94	0.680464	0.10012	6.79648	1.07206e-11	1.76622e-10		532.9	479.95	596.27	307.6	365.48	328.74
ENSG00000021852	C8B	732	1	0	0							0	0	0	0	0	0
ENSG00000022267	FHL1	2273	X	402.303	306.484	0.397192	0.0780318	5.09013	3.57814e-07	3.14638e-06		411.96	432.42	362.53	301.11	303.59	314.75
ENSG00000022277	RTF2	51507	20	2570.96	2398.61	0.0996954	0.0401067	2.48575	0.0129277	0.0398536		2526.92	2571.92	2614.05	2373.67	2350.09	2472.07
ENSG00000022355	GABRA1	2554	5	0	0.333	-0.128891	0.648688	-0.198695	0.842502			0	0	0	0	0	1
ENSG00000022556	NLRP2	55655	19	3.268	2.532	0.145409	0.502838	0.289176	0.772447	0.894187		2.27	4.67	2.86	4.63	1.96	1
ENSG00000022567	SLC45A4	57210	8	809.082	738.213	0.131056	0.0624117	2.09985	0.0357417	0.0928424		789.9	814.97	822.37	746.75	760.44	707.45
ENSG00000022840	RNF10	9921	12	8074.25	7306.57	0.144003	0.0307121	4.68882	2.74789e-06	2.091e-05		7989.7	8057.02	8176.05	7182.16	7328.32	7409.22
ENSG00000022976	ZNF839	55778	14	615.4	668.955	-0.118055	0.0809817	-1.45779	0.144898	0.284802		661.4	620.97	563.83	708.77	638.61	659.49
ENSG00000023041	ZDHHC6	64429	10	1203.4	968.146	0.313429	0.0509753	6.14864	7.81525e-10	1.02987e-08		1185.23	1216.23	1208.76	970.96	939.25	994.23
ENSG00000023171	GRAMD1B	57476	11	1.407	0.666	0.21997	0.618864	0.355442	0.722258	0.861144		0.76	1.56	1.91	0	0	2
ENSG00000023191	RNH1	6050	11	2765.5	3187.52	-0.203609	0.059545	-3.41941	0.000627575	0.0028709		2811.13	2946.68	2538.68	3079.66	3227.45	3255.46
ENSG00000023228	NDUFS1	4719	2	3558.7	3089.05	0.20264	0.0428126	4.73318	2.21027e-06	1.71387e-05		3435.49	3414.94	3825.66	3118.57	2968.07	3180.52
ENSG00000023287	RB1CC1	9821	8	3678.41	2845.99	0.368824	0.0735139	5.01707	5.24668e-07	4.49767e-06		3383.34	3495.19	4156.71	2848.96	3023.09	2665.92
ENSG00000023318	ERP44	23071	9	2652.71	2657.27	-0.00282194	0.0507448	-0.0556104	0.955652	1		2634.26	2654.51	2669.38	2754.46	2614.38	2602.97
ENSG00000023330	ALAS1	211	3	1754.6	1803.56	-0.0391734	0.0430606	-0.909727	0.362967	0.552129		1768.77	1757.72	1737.29	1788.13	1795.97	1826.58
ENSG00000023445	BIRC3	330	11	804.771	1555.34	-0.952099	0.0683203	-13.9358	3.83816e-44	4.26172e-42		771	779.91	863.4	1628.77	1546.42	1490.84
ENSG00000023516	AKAP11	11215	13	1959.07	1902.52	0.0411215	0.156297	0.263098	0.792475	0.906756		1623.64	1604.24	2649.34	1869.66	2058.3	1779.61
ENSG00000023572	GLRX2	51022	1	409.908	446.119	-0.124465	0.0996452	-1.24909	0.211634	0.377931		380.97	413.72	435.04	476.22	421.48	440.66
ENSG00000023608	SNAPC1	6617	14	1065.53	1200.5	-0.172008	0.0689774	-2.49369	0.0126425	0.0390962		1002.3	1113.38	1080.92	1161.82	1138.69	1300.99
ENSG00000023697	DERA	51071	12	592.856	472.491	0.325395	0.0763915	4.25958	2.04816e-05	0.000131758		563.89	598.37	616.3	458.61	492.22	466.64
ENSG00000023734	STRAP	11171	12	4301.29	3677.39	0.22547	0.0342014	6.59244	4.32666e-11	6.68228e-10		4153.58	4369.38	4380.91	3680.02	3643.04	3709.11
ENSG00000023839	ABCC2	1244	10	130.72	135.869	-0.0486759	0.101562	-0.479275	0.631743	0.790682		142.11	135.57	114.48	151.02	129.69	126.9
ENSG00000023892	DEF6	50619	6	636.08	762.123	-0.260458	0.099067	-2.62911	0.00856083	0.0280258		647.04	624.86	636.34	792.15	739.81	754.41
ENSG00000023902	PLEKHO1	51177	1	414.863	405.972	0.0361519	0.0725755	0.498128	0.618394	0.781004		427.07	425.41	392.11	367.82	424.43	425.67
ENSG00000023909	GCLM	2730	1	2290.69	1769.81	0.372111	0.0506238	7.35052	1.9744e-13	3.96253e-12		2284.28	2282.86	2304.94	1704.74	1789.1	1815.58
ENSG00000024048	UBR2	23304	6	1777.71	1817.96	-0.0344457	0.0571094	-0.603153	0.546407	0.726453		1747.6	1639.3	1946.22	1864.1	1843.13	1746.64
ENSG00000024422	EHD2	30846	19	2280.86	2581.47	-0.178676	0.0497837	-3.58905	0.000331879	0.00163329		2207.94	2333.5	2301.12	2515.42	2692.98	2536.02
ENSG00000024526	DEPDC1	55635	1	2154.72	1576.47	0.449191	0.0845257	5.31425	1.07095e-07	1.02012e-06		1963.03	2197.16	2303.98	1662.13	1601.44	1465.86
ENSG00000024862	CCDC28A	25901	6	285.606	248.355	0.205896	0.0938842	2.19308	0.0283014	0.0768006		304.62	289.84	262.36	241.81	255.44	247.81
ENSG00000025039	RRAGD	58528	6	60.047	65.662	-0.136533	0.177368	-0.769773	0.441434	0.628825		52.16	63.11	64.87	74.12	60.91	61.95
ENSG00000025156	HSF2	3298	6	447.455	410.219	0.125824	0.0946819	1.32892	0.183876	0.340453		451.26	450.34	440.76	398.39	415.59	416.68
ENSG00000025293	PHF20	51230	20	2065.42	1697.02	0.281058	0.0666172	4.219	2.45393e-05	0.000155568		1888.95	1964.19	2343.1	1738.1	1725.23	1627.73
ENSG00000025423	HSD17B6	8630	12	85.246	61.291	0.471047	0.225587	2.0881	0.036789	0.095089		80.88	88.04	86.82	62.07	64.84	56.96
ENSG00000025434	NR1H3	10062	11	135.337	112.342	0.265734	0.130941	2.02942	0.0424158	0.106665		143.62	123.1	139.29	111.18	115.93	109.91
ENSG00000025708	TYMP	1890	22	393.788	1797.09	-2.18171	0.106297	-20.5247	1.29654e-93	4.42356e-91		383.23	448	350.13	1709.38	1948.26	1733.65
ENSG00000025770	NCAPH2	29781	22	1336.12	1608.5	-0.265662	0.0716886	-3.70577	0.000210747	0.00108944		1421.06	1389.97	1197.31	1669.54	1559.2	1596.76
ENSG00000025772	TOMM34	10953	20	2535.28	2791.23	-0.138843	0.0492228	-2.82071	0.00479182	0.0170429		2532.97	2518.94	2553.94	2837.84	2629.12	2906.73
ENSG00000025796	SEC63	11231	6	1534.16	1343.91	0.187863	0.0624487	3.00828	0.0026273	0.0100965		1393.85	1469.45	1739.2	1352.68	1341.08	1337.96
ENSG00000025800	KPNA6	23633	1	3789.62	4225.1	-0.158353	0.0581125	-2.72494	0.00643125	0.0220545		3458.17	3545.06	4365.65	4302.63	4209.93	4162.76
ENSG00000026025	VIM	7431	10	4626.16	5930.44	-0.358875	0.0476543	-7.53079	5.04337e-14	1.06097e-12		4475.59	4577.41	4825.49	6370.56	5648.28	5772.5
ENSG00000026036	RTEL1-TNFRSF6B		20	146.83	168.713	-0.194704	0.197569	-0.985504	0.324377	0.51066		172.34	152.71	115.44	187.15	162.11	156.88
ENSG00000026103	FAS	355	10	413.481	485.988	-0.232151	0.0832476	-2.78868	0.00529234	0.0185593		433.12	402.81	404.51	505.86	478.47	473.63
ENSG00000026297	RNASET2	8635	6	344.743	408.378	-0.243317	0.0912879	-2.66538	0.00769008	0.0256404		336.37	359.18	338.68	404.88	416.57	403.69
ENSG00000026508	CD44	960	11	3640.61	4372.82	-0.264575	0.0398769	-6.63479	3.24961e-11	5.08582e-10		3599.52	3641.67	3680.65	4416.58	4301.3	4400.57
ENSG00000026559	KCNG1	3755	20	0	0	0	0.828415	0	1	1		0	0	0	0	0	0
ENSG00000026652	AGPAT4	56895	6	646.727	792.793	-0.294518	0.0678625	-4.33992	1.42533e-05	9.4577e-05		653.84	631.88	654.47	834.77	773.21	770.4
ENSG00000026751	SLAMF7	57823	1	198.221	307.757	-0.63373	0.15243	-4.15751	3.21733e-05	0.000198923		214.67	172.97	207.02	348.36	272.15	302.76
ENSG00000026950	BTN3A1	11119	6	885.742	1173.03	-0.405687	0.0777792	-5.21588	1.82944e-07	1.68334e-06		888.92	864.84	903.47	1262.81	1170.13	1086.15
ENSG00000027001	MIPEP	4285	13	278.744	245.703	0.179759	0.0872173	2.06105	0.0392986	0.100427		282.7	271.14	282.39	256.64	243.65	236.82
ENSG00000027075	PRKCH	5583	14	1081.07	734.57	0.556888	0.0767955	7.25158	4.11951e-13	8.00234e-12		1078.65	1058.84	1105.72	706.91	764.37	732.43
ENSG00000027644	INSRR	3645	1	0	0	0	0.648688	0	1			0	0	0	0	0	0
ENSG00000027697	IFNGR1	3459	6	823.793	961.565	-0.225664	0.06843	-3.29773	0.000974705	0.00423191		769.49	807.96	893.93	961.7	967.74	955.26
ENSG00000027847	B4GALT7	11285	5	459.885	492.517	-0.0968235	0.075477	-1.28282	0.199555	0.361384		465.62	479.95	434.08	507.72	493.2	476.63
ENSG00000027869	SH2D2A	9047	1	71.734	86.316	-0.261305	0.163716	-1.59609	0.110469	0.230305		74.83	71.68	68.69	79.68	93.34	85.93
ENSG00000028116	VRK2	7444	2	1206.46	1508.14	-0.323834	0.0569826	-5.68303	1.32328e-08	1.46758e-07		1164.82	1169.48	1285.08	1533.34	1441.3	1549.79
ENSG00000028137	TNFRSF1B	7133	1	7.343	12.559	-0.723385	0.355858	-2.03279	0.0420737	0.106074		7.56	7.79	6.68	13.9	11.79	11.99
ENSG00000028203	VEZT	55591	12	3367.92	3418.92	-0.021769	0.0458732	-0.474546	0.635111	0.793235		3319.84	3400.92	3382.99	3399.3	3471.1	3386.36
ENSG00000028277	POU2F2	5452	19	35.353	45.513	-0.354985	0.23581	-1.50538	0.132226	0.265627		43.84	28.83	33.39	45.4	46.18	44.96
ENSG00000028310	BRD9	65980	5	3138.66	3855.88	-0.29568	0.0741898	-3.98545	6.73526e-05	0.000389216		3460.44	3210.81	2744.75	4002.44	3747.18	3818.02
ENSG00000028528	SNX1	6642	15	4832.04	4955.33	-0.0353942	0.0404755	-0.874461	0.381867	0.571864		5097.68	4882.05	4516.38	5094.78	4819.06	4952.14
ENSG00000028839	TBPL1	9519	6	592.896	551.581	0.102762	0.109104	0.941866	0.346261	0.534165		575.98	553.96	648.74	509.57	582.61	562.56
ENSG00000029153	ARNTL2	56938	12	0.578	4.525	-1.54617	0.571086	-2.70743	0.0067807	0.0230674		0	0.78	0.95	4.63	2.95	6
ENSG00000029363	BCLAF1	9774	6	3966.71	3742.8	0.0830332	0.0604353	1.37392	0.169467	0.320472		3758.26	3849.7	4292.19	3729.13	3805.14	3694.12
ENSG00000029364	SLC39A9	55334	14	4097.9	3970.45	0.0445303	0.0387255	1.1499	0.250187	0.425848		4000.14	3989.94	4303.63	3959.82	4062.55	3888.97
ENSG00000029534	ANK1	286	8	35.54	62.858	-0.812358	0.180344	-4.50449	6.65316e-06	4.70764e-05		37.04	34.28	35.3	66.71	60.91	60.95
ENSG00000029559	IBSP	3381	4	8.607	14.444	-0.679795	0.796856	-0.853096	0.393606			8.31	7.01	10.49	17.6	14.74	10.99
ENSG00000029639	TFB1M	51106	6	248.899	260.024	-0.0640334	0.092172	-0.694716	0.487233	0.673209		244.91	250.88	250.91	266.83	255.44	257.8
ENSG00000029725	RABEP1	9135	17	1416.59	1273.1	0.15402	0.0482279	3.19359	0.00140515	0.00585688		1421.06	1402.44	1426.28	1249.84	1263.47	1305.98
ENSG00000029993	HMGB3	3149	X	6583.83	3249.07	1.01875	0.0397206	25.6479	4.46179e-145	3.22021e-142		6387.22	6709.9	6654.37	3106.53	3233.34	3407.34
ENSG00000030066	NUP160	23279	11	2990.61	2908.32	0.0386074	0.0479834	0.804598	0.421051	0.608698		2859.51	2860.98	3251.34	2944.39	2810.87	2969.69
ENSG00000030110	BAK1	578	6	1944.06	2713.31	-0.480627	0.0531235	-9.04736	1.46462e-19	4.81324e-18		1875.35	2003.93	1952.9	2583.06	2802.03	2754.85
ENSG00000030304	MUSK	4593	9	6.905	4.242	0.539885	1.04438	0.516946	0.605194			5.29	7.79	7.63	1.85	6.88	4
ENSG00000030419	IKZF2	22807	2	837.146	731.478	0.192689	0.158471	1.21592	0.224014	0.393745		737.74	764.33	1009.36	716.18	855.74	622.51
ENSG00000030582	GRN	2896	17	4314.1	4292.11	0.00813451	0.052212	0.155798	0.876192	0.954698		4468.03	4447.29	4026.96	4189.59	4427.05	4259.68
ENSG00000031003	FAM13B	51306	5	797.673	837.883	-0.0720606	0.0595606	-1.20987	0.226329	0.396439		767.98	810.3	814.74	840.33	842.97	830.35
ENSG00000031081	ARHGAP31	57514	3	95.208	103.806	-0.132076	0.14988	-0.881212	0.378203	0.568304		92.97	81.03	111.62	95.43	108.07	107.92
ENSG00000031691	CENPQ	55166	6	305.977	312.178	-0.0282607	0.106839	-0.264517	0.791382	0.905895		312.18	314.77	290.98	328.9	345.83	261.8
ENSG00000031698	SARS1	6301	1	3851.02	3518.66	0.130207	0.0387129	3.3634	0.000769879	0.00343072		3796.05	3923.71	3833.3	3522.52	3522.19	3511.26
ENSG00000031823	RANBP3	8498	19	1553.97	1532.73	0.0207118	0.0437417	0.473502	0.635855	0.793775		1578.29	1580.08	1503.55	1584.3	1511.05	1502.83
ENSG00000032219	ARID4A	5926	14	744.091	704.237	0.0754959	0.0746296	1.01161	0.311726	0.497283		709.78	684.86	837.64	694.87	765.35	652.49
ENSG00000032389	EIPR1	7260	2	1690.13	1507.39	0.165187	0.0564122	2.92821	0.00340917	0.0127234		1634.22	1735.13	1701.04	1410.12	1613.23	1498.83
ENSG00000032444	PNPLA6	10908	19	1272.79	1114.81	0.193518	0.0709946	2.72582	0.00641419	0.0220202		1392.34	1313.62	1112.4	1098.82	1152.45	1093.15
ENSG00000032742	IFT88	8100	13	397.931	381.23	0.058739	0.0759877	0.773006	0.439519	0.626957		385.5	394.24	414.05	390.98	392.99	359.72
ENSG00000033011	ALG1	56052	16	604.648	666.825	-0.140692	0.0581101	-2.42113	0.0154723	0.0463799		618.31	581.23	614.4	629.09	676.93	694.46
ENSG00000033030	ZCCHC8	55596	12	1580.22	1809.86	-0.19477	0.0479174	-4.06469	4.80964e-05	0.00028743		1651.61	1564.5	1524.54	1885.41	1762.57	1781.61
ENSG00000033050	ABCF2	10061	7	829.29	861.045	-0.0530194	0.0634031	-0.836227	0.403027	0.591815		841.3	846.14	800.43	874.61	829.21	879.31
ENSG00000033100	CHPF2	54480	7	3352.15	4087.1	-0.285435	0.0396945	-7.1908	6.4413e-13	1.22463e-11		3437.76	3308.2	3310.49	4019.12	4127.4	4114.79
ENSG00000033122	LRRC7	57554	1	10.984	10.289	0.0896687	0.861882	0.104038	0.917139			7.56	10.13	15.26	11.12	13.75	6
ENSG00000033170	FUT8	2530	14	8918.48	7749.53	0.202616	0.0456154	4.44183	8.91964e-06	6.15583e-05		8676.8	9070.67	9007.96	7477.71	7964.96	7805.92
ENSG00000033178	UBA6	55236	4	3500.41	4085.26	-0.223709	0.0560325	-3.99249	6.53826e-05	0.000378908		3324.38	3422.73	3754.11	4210.9	4154.91	3889.97
ENSG00000033327	GAB2	9846	11	934.687	816.335	0.194491	0.0838903	2.31839	0.020428	0.0583457		912.35	918.6	973.11	778.25	876.37	794.38
ENSG00000033627	ATP6V0A1	535	17	1376.27	1936.34	-0.492279	0.0489409	-10.0587	8.4138e-24	3.76814e-22		1452.81	1305.05	1370.94	2014.19	1888.33	1906.51
ENSG00000033800	PIAS1	8554	15	2004.34	1942.07	0.0451843	0.0557688	0.810208	0.417821	0.60628		1929.02	2036.65	2047.35	1903.01	1920.75	2002.44
ENSG00000033867	SLC4A7	9497	3	1982.31	1079.79	0.873121	0.0816964	10.6874	1.16615e-26	6.23443e-25		1827.73	1816.16	2303.03	1132.17	1122.97	984.23
ENSG00000034053	APBA2	321	15	0.252	0.642	-0.409757	0.713797	-0.574052	0.565932	0.74005		0.76	0	0	0.93	0	1
ENSG00000034152	MAP2K3	5606	17	2343.92	2611.23	-0.155375	0.0484053	-3.20987	0.00132795	0.00557221		2365.16	2356.88	2309.71	2628.46	2504.34	2700.89
ENSG00000034239	EFCAB1	79645	8	0	0	0	0.648688	0	1			0	0	0	0	0	0
ENSG00000034510	TMSB10	9168	2	42815.6	42184.9	0.0213537	0.0515271	0.414416	0.678569	0.827286		41177.6	42826.6	44442.6	42234.1	41917.5	42402.9
ENSG00000034533	ASTE1	28990	3	315.441	332.489	-0.0770143	0.103807	-0.741898	0.458149	0.644997		325.79	291.4	329.14	334.46	321.27	341.73
ENSG00000034677	RNF19A	25897	8	1350.69	1174.91	0.201171	0.0507862	3.96113	7.45968e-05	0.000427162		1345.47	1364.26	1342.32	1171.09	1202.56	1151.1
ENSG00000034693	PEX3	8504	6	318.955	294.113	0.116599	0.095763	1.21758	0.223385	0.392897		297.82	336.59	322.46	279.8	292.78	309.76
ENSG00000034713	GABARAPL2	11345	16	1677.5	1671.4	0.00562	0.0524112	0.107229	0.914607	0.977758		1653.12	1720.33	1659.06	1639.89	1704.6	1669.7
ENSG00000034971	MYOC	4653	1	0.318	0	0.0788557	0.648688	0.121562	0.903246			0	0	0.95	0	0	0
ENSG00000035115	SH3YL1	26751	2	667.556	589.682	0.179715	0.0951003	1.88974	0.0587928	0.139088		659.13	704.34	639.2	573.5	617	578.55
ENSG00000035141	FAM136A	84908	2	3064.03	3239.18	-0.0796435	0.0458315	-1.73775	0.0822557	0.182666		3052.26	3180.42	2959.4	3320.55	3049.62	3347.39
ENSG00000035403	VCL	7414	10	8487.86	8934.07	-0.0746216	0.0450353	-1.65696	0.0975278	0.209012		8135.58	8079.61	9248.38	9264.91	8857.06	8680.23
ENSG00000035499	DEPDC1B	55789	5	1522.38	1050.77	0.533092	0.0618004	8.62603	6.35201e-18	1.86827e-16		1456.59	1523.98	1586.55	1089.55	1034.55	1028.2
ENSG00000035664	DAPK2	23604	15	199.316	201.752	-0.0129123	0.132644	-0.0973456	0.922452	0.982898		215.43	212.7	169.82	214.95	198.46	191.85
ENSG00000035681	NSMAF	8439	8	1813.01	1787.08	0.0217687	0.0475437	0.457866	0.647048	0.803458		1830	1866.02	1743.01	1822.41	1724.25	1814.59
ENSG00000035687	ADSS2	159	1	3194.29	3209.96	-0.0081933	0.0558983	-0.146575	0.883467	0.958888		2878.41	3266.13	3438.33	3273.29	3193.06	3163.53
ENSG00000035720	STAP1	26228	4	0.26	0	0.0788557	0.648688	0.121562	0.903246			0	0.78	0	0	0	0
ENSG00000035862	TIMP2	7077	17	10598.8	10518.1	0.0107097	0.0338211	0.316657	0.751504	0.880658		10329.2	10576	10891.2	10509.2	10635.3	10409.9
ENSG00000035928	RFC1	5981	4	3818.44	3606.14	0.081604	0.0446955	1.82578	0.0678838	0.15628		3695.52	3732.83	4026.96	3603.13	3582.12	3633.17
ENSG00000036054	TBC1D23	55773	3	691.246	646.31	0.0957469	0.0664377	1.44115	0.149541	0.291911		671.23	705.12	697.4	666.15	658.26	614.52
ENSG00000036257	CUL3	8452	2	3661.82	2993.74	0.289936	0.0494448	5.86383	4.52307e-09	5.32134e-08		3653.94	3541.16	3790.37	3009.24	3013.27	2958.69
ENSG00000036448	MYOM2	9172	8	0	0	0	0.935415	0	1	1		0	0	0	0	0	0
ENSG00000036473	OTC	5009	X	0	0							0	0	0	0	0	0
ENSG00000036530	CYP46A1	10858	14	0	0.333	-0.605848	0.964154	-0.628373	0.52976			0	0	0	0	0	1
ENSG00000036549	ZZZ3	26009	1	2084.73	2100.05	-0.0108527	0.0492929	-0.220169	0.82574	0.925628		2077.93	2050.68	2125.58	2060.52	2114.3	2125.34
ENSG00000036565	SLC18A1	6570	8	0	0	0	0.648688	0	1			0	0	0	0	0	0
ENSG00000036672	USP2	9099	11	30.597	23.595	0.360026	0.24127	1.49221	0.135644	0.270956		26.46	31.94	33.39	21.31	28.49	20.98
ENSG00000036828	CASR	846	3	0	0	0	0.648688	0	1			0	0	0	0	0	0
ENSG00000037042	TUBG2	27175	17	968.64	995.472	-0.0370864	0.122053	-0.303854	0.761239	0.886475		1105.86	1093.12	706.94	1047.86	934.34	1004.22
ENSG00000037241	RPL26L1	51121	5	646.827	617.508	0.0666216	0.0748666	0.889871	0.373535	0.562966		629.65	663.04	647.79	622.6	593.42	636.5
ENSG00000037280	FLT4	2324	5	4.994	6.149	-0.295434	0.442886	-0.667064	0.504731	0.689623		3.02	6.23	5.72	5.56	5.89	6.99
ENSG00000037474	NSUN2	54888	5	8896.82	9539.71	-0.100392	0.0323574	-3.10259	0.00191835	0.00768363		9061.54	8885.24	8743.69	9626.25	9224.5	9768.39
ENSG00000037637	FBXO42	54455	1	993.122	1024.98	-0.046538	0.0603486	-0.771153	0.440616	0.627888		1002.3	959.11	1017.95	1046.01	1024.73	1004.22
ENSG00000037749	MFAP3	4238	5	920.433	922.806	-0.00516409	0.0661582	-0.0780567	0.937783	0.991576		906.31	886.65	968.34	898.7	986.41	883.31
ENSG00000037757	MRI1	84245	19	696.606	755.387	-0.114668	0.0761954	-1.50492	0.132345	0.265838		747.57	697.32	644.92	788.44	711.32	766.4
ENSG00000037897	METTL1	4234	12	779.06	917.52	-0.234193	0.063322	-3.69844	0.000216926	0.00111615		803.51	783.81	749.87	920.93	876.37	955.26
ENSG00000037965	HOXC8	3224	12	0	0	0	0.822268	0	1	1		0	0	0	0	0	0
ENSG00000038002	AGA	175	4	482.624	407	0.243073	0.0784839	3.0971	0.00195421	0.00780395		481.5	455.01	511.36	413.22	386.11	421.67
ENSG00000038210	PI4K2B	55300	4	1832.76	1325.04	0.466519	0.0638624	7.30506	2.77136e-13	5.50313e-12		1715.1	1872.26	1910.92	1351.75	1382.35	1241.03
ENSG00000038219	BOD1L1	259282	4	3392.38	3486.33	-0.0397303	0.148564	-0.267428	0.789139	0.904494		2797.53	2867.99	4511.61	3271.44	3802.2	3385.36
ENSG00000038274	MAT2B	27430	5	1532.23	1229.73	0.316845	0.055563	5.70245	1.18097e-08	1.32304e-07		1523.86	1517.75	1555.07	1197.95	1280.17	1211.06
ENSG00000038295	TLL1	7092	4	4.543	5.508	-0.22287	0.819813	-0.271854	0.785734			4.54	6.23	2.86	4.63	5.89	6
ENSG00000038358	EDC4	23644	16	2963.31	3189.72	-0.105164	0.062167	-1.69164	0.090714	0.197339		3153.55	3026.93	2709.45	3183.42	3183.23	3202.5
ENSG00000038382	TRIO	7204	5	6137.06	5968.6	0.0395758	0.0904479	0.437553	0.66171	0.814443		5667.62	5335.5	7408.05	5900.82	6314.4	5690.56
ENSG00000038427	VCAN	1462	5	2882.94	3464.03	-0.262112	0.231347	-1.13298	0.257222	0.434179		2256.31	2173.78	4218.73	3285.34	3676.44	3430.33
ENSG00000038532	CLEC16A	23274	16	1292.86	1388.23	-0.10411	0.0646009	-1.61158	0.107053	0.224906		1249.48	1233.37	1395.75	1310.06	1532.67	1321.97
ENSG00000038945	MSR1	4481	8	10.932	7.847	0.465459	0.687374	0.677155	0.498308			12.09	14.02	6.68	3.71	8.84	10.99
ENSG00000039068	CDH1	999	16	16418.1	19135.7	-0.220951	0.0630154	-3.5063	0.000454381	0.00216408		15975.6	15231.3	18047.4	18884.7	18738.8	19783.6
ENSG00000039123	MTREX	23517	5	3219.34	2769.18	0.21625	0.0496453	4.35591	1.32518e-05	8.85889e-05		3111.98	3189.77	3356.28	2859.15	2777.47	2670.92
ENSG00000039139	DNAH5	1767	5	879.527	496.066	0.819205	0.180205	4.54596	5.46848e-06	3.95133e-05		701.46	703.56	1233.56	432.67	565.91	489.62
ENSG00000039319	ZFYVE16	9765	5	1214.59	1109.44	0.128119	0.0753117	1.70118	0.0889089	0.194246		1099.06	1192.85	1351.86	1121.98	1170.13	1036.19
ENSG00000039523	RIPOR1	79567	16	2559.61	3257.64	-0.347029	0.0806201	-4.3045	1.67367e-05	0.000109698		2607.8	2633.47	2437.55	3230.68	3322.75	3219.49
ENSG00000039537	C6	729	5	0	0.309	-0.128891	0.648688	-0.198695	0.842502			0	0	0	0.93	0	0
ENSG00000039560	RAI14	26064	5	6402.62	6105.09	0.0678222	0.0543398	1.24811	0.21199	0.378352		5858.1	6243.19	7106.58	6175.07	6117.9	6022.31
ENSG00000039600	SOX30	11063	5	23.033	33.737	-0.535272	0.43597	-1.22777	0.219532	0.388304		23.43	21.82	23.85	41.69	25.54	33.97
ENSG00000039650	PNKP	11284	19	2214.24	2381.71	-0.104066	0.104946	-0.991617	0.321384	0.507513		2483.84	2340.52	1818.38	2498.75	2286.23	2360.16
ENSG00000039987	BEST2	54831	19	1.97	1.665	0.18675	0.906669	0.205974	0.836811			2.27	0.78	2.86	0	0	5
ENSG00000040199	PHLPP2	23035	16	524.099	612.638	-0.229409	0.0795235	-2.88479	0.00391671	0.014378		502.66	475.27	594.36	592.03	653.35	592.54
ENSG00000040275	SPDL1	54908	5	1438.43	1133.48	0.342365	0.0532738	6.42651	1.30563e-10	1.89045e-09		1376.47	1477.24	1461.58	1182.2	1058.13	1160.1
ENSG00000040341	STAU2	27067	8	1406.2	996.136	0.496378	0.0689021	7.20411	5.84251e-13	1.11304e-11		1348.5	1447.63	1422.46	1005.24	1013.92	969.24
ENSG00000040487	SLC66A1	54896	1	369.548	410.923	-0.152257	0.0963943	-1.57952	0.114217	0.236617		375.67	368.53	364.44	408.58	420.5	403.69
ENSG00000040531	CTNS	1497	17	329.786	380.423	-0.203716	0.0812401	-2.50758	0.0121562	0.0377792		367.36	297.63	324.37	377.08	364.5	399.69
ENSG00000040608	RTN4R	65078	22	214.5	270.808	-0.332512	0.122758	-2.70867	0.0067553	0.0229894		202.58	241.53	199.39	252.01	301.62	258.8
ENSG00000040633	PHF23	79142	17	1450.43	1522.03	-0.0690855	0.047186	-1.46411	0.143164	0.282445		1426.35	1479.57	1445.36	1479.61	1531.69	1554.79
ENSG00000040731	CDH10	1008	5	0	0	0	0.99104	0	1	1		0	0	0	0	0	0
ENSG00000040933	INPP4A	3631	2	2090.43	2462.02	-0.237092	0.0541544	-4.37807	1.19733e-05	8.05878e-05		2116.48	1925.24	2229.57	2432.04	2587.85	2366.16
ENSG00000041353	RAB27B	5874	18	1266.82	1460.88	-0.206751	0.0966963	-2.13815	0.0325046	0.0861388		1188.25	1181.17	1431.05	1540.76	1518.91	1322.97
ENSG00000041357	PSMA4	5685	15	6323.58	5783.48	0.128859	0.0472149	2.7292	0.0063489	0.02182		6223.2	6456.68	6290.88	5668.27	5612.91	6069.27
ENSG00000041515	MYO16	23026	13	49.733	57.749	-0.212634	0.216794	-0.980811	0.326686	0.513121		55.18	44.41	49.61	60.22	52.07	60.95
ENSG00000041802	LSG1	55341	3	2101.36	2539.16	-0.274235	0.043932	-6.24226	4.313e-10	5.86475e-09		2118.74	1980.56	2204.77	2558.04	2441.46	2617.96
ENSG00000041880	PARP3	10039	3	458.232	581.804	-0.338374	0.0832145	-4.06629	4.77675e-05	0.000285646		498.13	476.83	399.74	554.04	568.86	622.51
ENSG00000041982	TNC	3371	9	14171.1	14352.1	-0.0182915	0.15523	-0.117835	0.906198	0.972315		12510.6	12022	17980.6	14242	15035.9	13778.3
ENSG00000041988	THAP3	90326	1	537.491	561.051	-0.0638098	0.0740167	-0.8621	0.388632	0.577593		519.29	544.61	548.57	595.73	570.82	516.6
ENSG00000042062	RIPOR3	140876	20	30.953	14.627	1.06442	0.417196	2.55137	0.0107301	0.0340177		27.97	38.18	26.71	10.19	16.7	16.99
ENSG00000042088	TDP1	55775	14	1434.23	1278.8	0.165116	0.0494585	3.33848	0.000842381	0.0037115		1424.09	1435.16	1443.45	1285.97	1265.43	1285
ENSG00000042286	AIFM2	84883	10	272.056	243.89	0.15837	0.0786908	2.01256	0.0441611	0.110139		284.21	261.01	270.94	235.33	250.53	245.81
ENSG00000042304	C2orf83	56918	2	0.26	0.327	-0.0250176	0.648688	-0.0385664	0.969236			0	0.78	0	0	0.98	0
ENSG00000042317	SPATA7	55812	14	191.026	200.198	-0.0645659	0.121548	-0.531195	0.595284	0.762549		182.92	212.7	177.45	197.34	201.41	201.84
ENSG00000042429	MED17	9440	11	269.113	304.681	-0.175433	0.117179	-1.49713	0.134359	0.268932		271.36	289.84	246.14	295.55	294.74	323.75
ENSG00000042445	RETSAT	54884	2	2108.83	2387.71	-0.177472	0.0540637	-3.28265	0.00102838	0.00444337		2211.72	2188.59	1926.19	2434.82	2405.11	2323.19
ENSG00000042493	CAPG	822	2	6200.1	7390.71	-0.253286	0.0484232	-5.23068	1.68887e-07	1.56424e-06		6053.12	6325	6222.19	7213.66	7557.23	7401.23
ENSG00000042753	AP2S1	1175	19	3695.33	3378.66	0.12955	0.0513986	2.5205	0.0117189	0.0366258		3679.64	3794.38	3611.96	3312.21	3337.48	3486.28
ENSG00000042781	USH2A	7399	1	5.498	2.919	0.638162	1.03393	0.617219	0.53709			4.54	6.23	5.72	2.78	0.98	5
ENSG00000042813	ZPBP	11055	7	1.4	0	0.494349	0.648688	0.762074	0.446016			1.51	0.78	1.91	0	0	0
ENSG00000042832	TG	7038	8	1.016	1.273	-0.204741	0.767516	-0.266758	0.789656	0.904743		2.27	0.78	0	1.85	1.96	0
ENSG00000042980	ADAM28	10863	8	425.757	299.285	0.507803	0.140347	3.6182	0.000296654	0.00147854		436.15	413.72	427.41	295.55	306.53	295.77
ENSG00000043039	BARX2	8538	11	298.722	343.396	-0.200775	0.14311	-1.40295	0.160633	0.308145		269.09	321.78	305.29	347.43	335.03	347.73
ENSG00000043093	DCUN1D1	54165	3	960.323	756.45	0.341916	0.098182	3.48247	0.000496804	0.00233999		858.68	987.16	1035.12	796.78	779.11	693.46
ENSG00000043143	JADE2	23338	5	3538.72	4430.5	-0.324741	0.0404107	-8.03603	9.27971e-16	2.32314e-14		3471.78	3478.05	3666.34	4283.17	4670.71	4337.62
ENSG00000043355	ZIC2	7546	13	418.442	377.257	0.150047	0.0816144	1.83848	0.0659912	0.152785		424.81	426.97	403.56	392.83	380.22	358.72
ENSG00000043462	LCP2	3937	5	0	0	0	1.03176	0	1			0	0	0	0	0	0
ENSG00000043514	TRIT1	54802	1	1042.73	1036.3	0.00815749	0.0565521	0.144247	0.885305	0.959942		1040.85	1024.56	1062.79	1047.86	1017.85	1043.19
ENSG00000043591	ADRB1	153	10	219.786	186.918	0.232236	0.163095	1.42393	0.154466	0.299406		228.28	217.38	213.7	215.87	167.02	177.86
ENSG00000044012	GUCA2B	2981	1	0.252	0.327	-0.140141	1.03535	-0.135356	0.89233			0.76	0	0	0	0.98	0
ENSG00000044090	CUL7	9820	6	1332.87	1430.92	-0.0999922	0.0750663	-1.33205	0.182843	0.339037		1489.85	1357.25	1151.52	1450.89	1402	1439.88
ENSG00000044115	CTNNA1	1495	5	20307	17892.7	0.182438	0.0337279	5.40911	6.3338e-08	6.27528e-07		20021.1	19909.2	20990.6	17419.9	18040.3	18217.8
ENSG00000044446	PHKA2	5256	X	1255.88	1324.44	-0.0758403	0.0537932	-1.40985	0.158584	0.305463		1321.29	1235.71	1210.67	1398.08	1275.26	1299.99
ENSG00000044459	CNTLN	54875	9	411.394	351.563	0.221562	0.0888186	2.49455	0.0126117	0.0390333		368.87	420.73	444.58	374.3	356.64	323.75
ENSG00000044524	EPHA3	2042	3	126.25	92.457	0.448139	0.255329	1.75514	0.0792349	0.177258		126.23	116.09	136.43	99.13	95.3	82.94
ENSG00000044574	HSPA5	3309	9	36567.7	38294.6	-0.0666509	0.0305188	-2.18393	0.0289676	0.0782689		35952.1	36242.2	37508.7	38455.9	37146.6	39281.4
ENSG00000046604	DSG2	1829	18	9288.56	9642.62	-0.0544688	0.0569952	-0.955673	0.339238	0.526708		8874.84	8602.41	10388.4	9999.62	9734.41	9193.83
ENSG00000046647	GEMIN8	54960	X	344.182	346.597	-0.00776686	0.0889599	-0.0873074	0.930427	0.98747		367.36	347.49	317.69	378.93	330.11	330.74
ENSG00000046651	OFD1	8481	X	1224.2	1326.78	-0.114545	0.066994	-1.70978	0.0873068	0.191258		1278.96	1279.34	1114.31	1437.91	1266.42	1276.01
ENSG00000046653	GPM6B	2824	X	0.318	0	0.212821	0.949776	0.224074	0.822699			0	0	0.95	0	0	0
ENSG00000046774	MAGEC2	51438	X	0	0	0	0.942616	0	1	1		0	0	0	0	0	0
ENSG00000046889	PREX2	80243	8	0	0							0	0	0	0	0	0
ENSG00000047056	WDR37	22884	10	541.099	629.357	-0.220764	0.068219	-3.2361	0.00121174	0.00515724		523.07	534.49	565.74	655.96	640.58	591.54
ENSG00000047188	YTHDC2	64848	5	1061.91	920.287	0.204734	0.0595698	3.43687	0.000588473	0.0027112		1047.66	1032.35	1105.72	923.71	962.83	874.32
ENSG00000047230	CTPS2	56474	X	966.276	952.595	0.0190684	0.0607055	0.314113	0.753435	0.88204		938.81	937.3	1022.72	919.08	925.5	1013.21
ENSG00000047249	ATP6V1H	51606	8	1257.58	1161.45	0.114343	0.0633061	1.80619	0.0708883	0.161867		1236.63	1248.17	1287.94	1128.47	1130.83	1225.05
ENSG00000047315	POLR2B	5431	4	4116.31	3608.35	0.18933	0.0421395	4.49292	7.02516e-06	4.94847e-05		4057.59	4067.85	4223.5	3690.22	3553.63	3581.21
ENSG00000047346	FAM214A	56204	15	1489.66	1258.55	0.242125	0.0691952	3.49915	0.000466739	0.00221674		1452.81	1472.56	1543.62	1283.19	1325.37	1167.09
ENSG00000047365	ARAP2	116984	4	958.037	1150.75	-0.265341	0.09019	-2.94202	0.00326075	0.0122302		932.76	901.46	1039.89	1154.41	1194.7	1103.14
ENSG00000047410	TPR	7175	1	4892.61	4292	0.187914	0.0791723	2.37348	0.0176215	0.0516991		4533.04	4289.91	5854.89	4199.79	4399.54	4276.67
ENSG00000047457	CP	1356	3	93.787	25.746	1.82908	0.209407	8.73458	2.44566e-18	7.43807e-17		89.95	95.05	96.36	27.79	30.46	18.99
ENSG00000047578	KATNIP	23247	16	1188.57	1113.9	0.0924717	0.0503334	1.83718	0.0661827	0.153096		1211.68	1124.29	1229.75	1110.86	1080.73	1150.1
ENSG00000047579	DTNBP1	84062	6	335.437	308.492	0.123434	0.108882	1.13365	0.256943	0.433899		328.05	361.52	316.74	281.65	274.11	369.71
ENSG00000047597	XK	7504	X	80.359	69.623	0.19969	0.191637	1.04202	0.297402	0.480725		68.03	83.37	89.68	72.27	75.65	60.95
ENSG00000047617	ANO2	57101	12	0	0	0	0.988075	0	1	1		0	0	0	0	0	0
ENSG00000047621	C12orf4	57102	12	327.851	335.483	-0.03512	0.0833738	-0.421236	0.673583	0.823331		334.86	306.2	342.5	333.54	326.18	346.73
ENSG00000047634	SCML1	6322	X	592.297	538.456	0.136881	0.0831954	1.6453	0.0999081	0.212946		574.47	614.74	587.68	558.67	556.08	500.61
ENSG00000047644	WWC3	55841	X	1112.69	882.536	0.330507	0.058294	5.66966	1.43082e-08	1.57474e-07		1072.6	1030.01	1235.47	862.56	912.72	872.32
ENSG00000047648	ARHGAP6	395	X	0	0	0	0.847437	0	1			0	0	0	0	0	0
ENSG00000047662	FAM184B	27146	4	2.698	3.81	-0.419514	0.801345	-0.523513	0.600618			1.51	4.67	1.91	6.49	2.95	2
ENSG00000047849	MAP4	4134	3	8538.59	7933.43	0.10539	0.0399131	2.64049	0.00827863	0.0272064		8221.75	8342.18	9051.85	8004.89	8168.34	7627.06
ENSG00000047932	GOPC	57120	6	857.588	783.76	0.126178	0.0639322	1.97361	0.0484257	0.118847		821.65	826.66	924.46	819.94	789.91	741.42
ENSG00000047936	ROS1	6098	6	1.593	6.501	-1.68747	0.622384	-2.71129	0.00670212	0.0228456		2.27	1.56	0.95	4.63	6.88	7.99
ENSG00000048028	USP28	57646	11	1499.61	1433.06	0.0642464	0.0550272	1.16754	0.242993	0.417363		1432.4	1503.73	1562.7	1425.87	1433.44	1439.88
ENSG00000048052	HDAC9	9734	7	1028.91	1446.3	-0.491548	0.0994933	-4.94052	7.79151e-07	6.47796e-06		945.61	1031.57	1109.54	1501.84	1509.09	1327.96
ENSG00000048140	TSPAN17	26262	5	1665.63	1630.54	0.0319586	0.0488062	0.654806	0.512593	0.696409		1715.86	1678.25	1602.77	1638.04	1576.88	1676.69
ENSG00000048162	NOP16	51491	5	2197.05	2451.62	-0.157969	0.0513961	-3.07356	0.00211518	0.00835608		2189.8	2225.2	2176.14	2503.38	2329.46	2522.03
ENSG00000048342	CC2D2A	57545	4	879.432	862.84	0.0261074	0.0618905	0.421832	0.673147	0.82306		868.51	862.5	907.28	886.65	809.56	892.3
ENSG00000048392	RRM2B	50484	8	586.212	446.723	0.388811	0.0856532	4.53936	5.64246e-06	4.06608e-05		544.99	594.48	619.17	458.61	454.89	426.67
ENSG00000048405	ZNF800	168850	7	673.526	636.859	0.0811569	0.0782747	1.03682	0.299819	0.483508		655.35	701.22	664.01	608.7	710.33	591.54
ENSG00000048462	TNFRSF17	608	16	0	0.327	-0.601051	1.04499	-0.575177	0.565172			0	0	0	0	0.98	0
ENSG00000048471	SNX29	92017	16	827.415	1007.4	-0.286518	0.0770675	-3.71775	0.000201002	0.00104453		767.22	787.7	927.32	992.27	1024.73	1005.22
ENSG00000048540	LMO3	55885	12	9.166	7.057	0.331622	0.917637	0.361387	0.71781			7.56	4.67	15.26	9.26	4.91	6.99
ENSG00000048544	MRPS10	55173	6	2721.67	2711.05	0.00468879	0.0574442	0.0816234	0.934946	0.989692		2617.63	2704.37	2843.01	2873.98	2681.19	2577.99
ENSG00000048545				0	0							0	0	0	0	0	0
ENSG00000048649	RSF1	51773	11	3125.64	3305.62	-0.0816109	0.0965878	-0.84494	0.398144	0.586987		2743.86	2751.12	3881.95	3239.01	3515.31	3162.53
ENSG00000048707	VPS13D	55187	1	2291.88	1540.74	0.567444	0.193832	2.9275	0.00341695	0.0127473		1792.96	1914.33	3168.34	1478.68	1700.67	1442.88
ENSG00000048740	CELF2	10659	10	238.084	200.483	0.245663	0.196934	1.24744	0.212237	0.378612		214.67	226.73	272.85	214.02	191.58	195.85
ENSG00000048828	FAM120A	23196	9	13748.4	11518.8	0.254928	0.0389449	6.54585	5.9157e-11	8.97398e-10		13556	13297.5	14391.6	11297.6	12207.3	11051.4
ENSG00000048991	R3HDM1	23518	2	2546.44	2208.09	0.204394	0.0576384	3.54614	0.000390921	0.00188771		2413.54	2466.74	2759.06	2145.75	2287.21	2191.29
ENSG00000049089	COL9A2	1298	1	26.465	19.601	0.423613	0.376735	1.12443	0.260829	0.438297		32.5	16.36	30.53	10.19	20.63	27.98
ENSG00000049130	KITLG	4254	12	1628.26	1551.68	0.0686531	0.0905678	0.75803	0.448433	0.635467		1471.71	1659.55	1753.51	1498.14	1737.02	1419.89
ENSG00000049167	ERCC8	1161	5	344.913	278.999	0.302222	0.0884052	3.4186	0.00062944	0.00287803		318.23	356.84	359.67	289.07	272.15	275.79
ENSG00000049192	ADAMTS6	11174	5	54.587	35.237	0.630765	0.237314	2.65793	0.00786214	0.0260936		49.13	63.11	51.52	33.35	34.39	37.97
ENSG00000049239	H6PD	9563	1	1984.02	1354.49	0.547689	0.0683538	8.01256	1.12343e-15	2.79962e-14		1762.72	1924.46	2264.87	1399.93	1430.49	1233.04
ENSG00000049245	VAMP3	9341	1	1990.12	1840.04	0.111846	0.0547694	2.04212	0.0411395	0.104181		1937.33	1923.68	2109.36	1812.22	1888.33	1819.58
ENSG00000049246	PER3	8863	1	1877.74	1400.85	0.421011	0.0828568	5.08119	3.75078e-07	3.28128e-06		1851.16	1779.54	2002.51	1546.31	1448.18	1208.06
ENSG00000049247	UTS2	10911	1	0.252	0	0.0788557	0.648688	0.121562	0.903246			0.76	0	0	0	0	0
ENSG00000049249	TNFRSF9	3604	1	62.967	235.645	-1.90286	0.153065	-12.4317	1.75851e-35	1.4473e-33		60.47	56.88	71.55	256.64	196.5	253.8
ENSG00000049283	EPN3	55040	17	1249.89	974.227	0.360125	0.106636	3.37713	0.000732455	0.00328188		1307.68	1301.93	1140.07	905.18	1051.25	966.25
ENSG00000049323	LTBP1	4052	2	881.887	593.189	0.56886	0.0687636	8.27268	1.30979e-16	3.44714e-15		843.57	837.57	964.53	571.65	594.4	613.52
ENSG00000049449	RCN1	5954	11	1211.43	1061.73	0.189575	0.0583719	3.24771	0.0011634	0.00496953		1155.75	1241.16	1237.38	1025.63	1099.39	1060.17
ENSG00000049540	ELN	2006	7	2.372	3.842	-0.569315	0.660133	-0.862425	0.388454	0.577419		2.27	3.9	0.95	4.63	5.89	1
ENSG00000049541	RFC2	5982	7	1920.56	1912.29	0.00680375	0.0436714	0.155794	0.876195	0.954698		1918.43	1936.15	1907.11	1870.59	1859.83	2006.44
ENSG00000049618	ARID1B	57492	6	1680.11	1536.16	0.127314	0.0706954	1.80089	0.0717208	0.163509		1610.03	1531.78	1898.52	1470.34	1666.29	1471.85
ENSG00000049656	CLPTM1L	81037	5	8570.6	8840.91	-0.0442119	0.0352698	-1.25353	0.210011	0.375678		8768.26	8716.94	8226.61	8652.5	8787.3	9082.92
ENSG00000049759	NEDD4L	23327	18	2199.83	2342.88	-0.0915474	0.0516448	-1.77263	0.0762895	0.171878		2179.21	2123.92	2296.35	2310.67	2249.88	2468.08
ENSG00000049768	FOXP3	50943	X	17.381	14.283	0.271659	0.460107	0.590426	0.554905	0.732998		14.36	18.7	19.08	10.19	18.67	13.99
ENSG00000049769	PPP1R3F	89801	X	78.672	88.722	-0.159102	0.174323	-0.91268	0.361411	0.550348		81.64	94.28	60.1	75.97	97.27	92.93
ENSG00000049860	HEXB	3074	5	2068.72	1700.11	0.281999	0.0521	5.41264	6.21025e-08	6.15937e-07		1997.8	2090.41	2117.95	1759.41	1670.22	1670.7
ENSG00000049883	PTCD2	79810	5	580.14	758.547	-0.385354	0.0627216	-6.14389	8.05267e-10	1.05892e-08		601.68	579.68	559.06	794.93	770.26	710.45
ENSG00000050030	NEXMIF	340533	X	1.023	0	1.3185	0.969659	1.35975	0.173909			1.51	1.56	0	0	0	0
ENSG00000050130	JKAMP	51528	14	1227.74	1118.83	0.134572	0.0665019	2.02358	0.0430136	0.107974		1251.74	1217.01	1214.48	1070.1	1103.32	1183.08
ENSG00000050165	DKK3	27122	11	15.311	19.682	-0.373477	0.264784	-1.4105	0.158393	0.305221		13.61	13.25	19.08	21.31	13.75	23.98
ENSG00000050327	ARHGEF5	7984	7	751.775	728.145	0.0467633	0.0983586	0.475436	0.634476	0.792725		805.02	700.44	749.87	678.19	737.84	768.4
ENSG00000050344	NFE2L3	9603	7	245.513	408.411	-0.73052	0.103922	-7.0295	2.07273e-12	3.69371e-11		278.92	218.16	239.46	417.85	409.69	397.69
ENSG00000050393	MCUR1	63933	6	1601.18	1296.64	0.301794	0.0549985	5.48733	4.08066e-08	4.15934e-07		1543.52	1538.01	1722.03	1341.56	1270.35	1278
ENSG00000050405	LIMA1	51474	12	7449.35	9228.84	-0.309369	0.0506682	-6.10578	1.02301e-09	1.31756e-08		7074.32	7319.96	7953.76	9521.55	9140.01	9024.97
ENSG00000050426	LETMD1	25875	12	1449.43	1641.12	-0.178809	0.0579245	-3.08692	0.00202239	0.00805394		1532.93	1402.44	1412.92	1758.48	1562.14	1602.75
ENSG00000050438	SLC4A8	9498	12	364.627	237.284	0.615707	0.118595	5.19166	2.08426e-07	1.90044e-06		345.44	350.61	397.83	245.52	252.5	213.83
ENSG00000050555	LAMC3	10319	9	82.967	117.055	-0.478472	0.134232	-3.56452	0.000364516	0.00177482		102.04	81.03	65.83	121.37	118.88	110.91
ENSG00000050628	PTGER3	5733	1	4.04	3.866	0.0687657	1.00048	0.0687328	0.945202			3.02	6.23	2.86	3.71	5.89	2
ENSG00000050730	TNIP3	79931	4	7.862	9.597	-0.273954	0.408001	-0.671454	0.501931	0.687298		7.56	9.35	6.68	12.97	9.82	6
ENSG00000050748	MAPK9	5601	5	3239.26	2158.28	0.585702	0.0480307	12.1943	3.33184e-34	2.59427e-32		3217.04	3213.15	3287.59	2065.15	2104.47	2305.2
ENSG00000050767	COL23A1	91522	5	1.089	0.661	0.232695	0.725568	0.320707	0.748433			0.76	1.56	0.95	0	0.98	1
ENSG00000050820	BCAR1	9564	16	4027.02	4985.01	-0.307011	0.0795701	-3.85837	0.000114144	0.00062629		4181.55	4155.9	3743.62	4654.69	5256.27	5044.07
ENSG00000051009	FAM160A2	84067	11	594.013	713.99	-0.263131	0.0752281	-3.49777	0.000469165	0.00222658		619.07	607.72	555.25	746.75	685.77	709.45
ENSG00000051108	HERPUD1	9709	16	1398.01	1416.19	-0.0182574	0.0473987	-0.385188	0.700098	0.843935		1432.4	1386.86	1374.76	1459.22	1376.45	1412.9
ENSG00000051128	HOMER3	9454	19	717.659	597.602	0.265848	0.0941869	2.82255	0.00476429	0.0169675		718.09	786.15	648.74	561.45	626.82	604.53
ENSG00000051180	RAD51	5888	15	866.055	843.553	0.0391997	0.0603445	0.649598	0.515952	0.699862		891.19	870.29	836.69	865.34	785	880.31
ENSG00000051341	POLQ	10721	3	850.028	857.163	-0.0163076	0.0820453	-0.198764	0.842447	0.93536		776.29	759.65	1014.13	854.23	902.9	814.37
ENSG00000051382	PIK3CB	5291	3	1636.28	1537.06	0.0882121	0.0654008	1.34879	0.177404	0.331629		1548.81	1547.36	1812.66	1542.61	1526.77	1541.8
ENSG00000051523	CYBA	1535	16	2599.61	2756.73	-0.0835695	0.0605556	-1.38005	0.167572	0.317754		2754.44	2590.62	2453.77	2600.66	2817.75	2851.78
ENSG00000051596	THOC3	84321	5	806.075	723.525	0.156347	0.0810061	1.93007	0.0535986	0.129045		810.31	784.59	823.33	641.13	725.07	804.37
ENSG00000051620	HEBP2	23593	6	1546.45	1408.21	0.13549	0.0521736	2.59691	0.00940665	0.0303448		1561.66	1551.25	1526.45	1398.08	1421.65	1404.9
ENSG00000051825	MPHOSPH9	10198	12	1771.46	1333.41	0.408083	0.062348	6.54525	5.93953e-11	9.00285e-10		1680.33	1754.61	1879.44	1352.68	1370.56	1277
ENSG00000052126	PLEKHA5	54477	12	1108.6	1058.37	0.0653593	0.0742731	0.879986	0.378867	0.56897		1107.37	1052.61	1165.83	1129.39	1036.52	1009.21
ENSG00000052344	PRSS8	5652	16	2945.62	3355.02	-0.187292	0.065134	-2.87549	0.00403396	0.0147501		2959.29	3035.5	2842.06	3390.03	3504.51	3170.53
ENSG00000052723	SIKE1	80143	1	1441.2	1673.76	-0.2169	0.0671259	-3.23124	0.00123256	0.00523636		1365.13	1440.62	1517.86	1724.2	1721.3	1575.77
ENSG00000052749	RRP12	23223	10	1978.09	2522.68	-0.349591	0.0493629	-7.08206	1.42027e-12	2.60267e-11		2053.74	1986.79	1893.75	2571.01	2409.04	2587.98
ENSG00000052795	FNIP2	57600	4	356.739	368.159	-0.0496502	0.0994871	-0.499062	0.617736	0.780383		332.59	335.03	402.6	357.63	385.13	361.72
ENSG00000052802	MSMO1	6307	4	2954.88	2331.81	0.340537	0.0970752	3.50797	0.000451542	0.0021522		2631.23	3082.25	3151.16	2382.01	2520.06	2093.37
ENSG00000052841	TTC17	55761	11	1463.15	1645.1	-0.170108	0.0509573	-3.33825	0.000843077	0.0037137		1446.76	1442.95	1499.74	1697.33	1613.23	1624.73
ENSG00000052850	ALX4	60529	11	0	0	0	0.814131	0	1	1		0	0	0	0	0	0
ENSG00000053108	FSTL4	23105	5	74.992	92.905	-0.293234	0.183119	-1.60133	0.109303	0.228506		88.44	80.25	56.29	79.68	106.11	92.93
ENSG00000053254	FOXN3	1112	14	399.881	240.792	0.727801	0.09476	7.68046	1.58514e-14	3.49121e-13		374.16	385.67	439.81	207.53	279.02	235.82
ENSG00000053328	METTL24	728464	6	0	0	0	0.648688	0	1			0	0	0	0	0	0
ENSG00000053371	AKR7A2	8574	1	784.984	594.186	0.401584	0.0715239	5.61468	1.96929e-08	2.11527e-07		766.47	786.15	802.34	544.78	601.28	636.5
ENSG00000053372	MRTO4	51154	1	3010.28	3111.5	-0.0484677	0.0508189	-0.953735	0.340218	0.527724		2932.08	2925.65	3173.11	3095.41	2993.62	3245.47
ENSG00000053438	NNAT	4826	20	0	0	0	0.829517	0	1			0	0	0	0	0	0
ENSG00000053501	USE1	55850	19	366.179	310.255	0.23957	0.0886929	2.70111	0.00691077	0.0234647		383.23	353.73	361.58	313.15	287.87	329.74
ENSG00000053524	MCF2L2	23101	3	15.375	21.874	-0.486787	0.360189	-1.35148	0.176543	0.330357		18.14	15.58	12.4	24.09	25.54	15.99
ENSG00000053702	NRIP2	83714	12	0	0	0	0.648688	0	1			0	0	0	0	0	0
ENSG00000053747	LAMA3	3909	18	7123.43	14303.9	-1.00479	0.0801308	-12.5394	4.54665e-36	3.80883e-34		6622.3	6355.39	8392.61	14501.4	14230.2	14180
ENSG00000053770	AP5M1	55745	14	1133.08	1068.02	0.0861065	0.0800831	1.07521	0.282279	0.463605		1117.95	1206.1	1075.19	1035.82	1118.06	1050.18
ENSG00000053900	ANAPC4	29945	4	1225.61	1244.12	-0.0202059	0.0578428	-0.349325	0.726846	0.863588		1319.77	1187.4	1169.64	1273.93	1211.4	1247.03
ENSG00000053918	KCNQ1	3784	11	3.187	1.611	0.765372	0.685734	1.11614	0.264364	0.442279		4.54	3.12	1.91	1.85	0.98	2
ENSG00000054116	TRAPPC3	27095	1	1563.41	1648.22	-0.075955	0.0579308	-1.31113	0.189813	0.348225		1551.83	1561.38	1577.01	1594.49	1537.58	1812.59
ENSG00000054118	THRAP3	9967	1	6049.67	6358.19	-0.0727932	0.0480597	-1.51464	0.129863	0.261861		5713.73	5684.56	6750.72	6452.09	6314.4	6308.08
ENSG00000054148	PHPT1	29085	9	1976.49	1683.74	0.23193	0.0539078	4.30235	1.68994e-05	0.00011061		1984.95	2046	1898.52	1673.24	1723.27	1654.71
ENSG00000054179	ENTPD2	954	9	25.547	48.564	-0.893838	0.331777	-2.69409	0.00705804	0.0238724		30.99	30.39	15.26	53.74	56.98	34.97
ENSG00000054219	LY75	4065	2	125.458	101.99	0.293525	0.261607	1.12201	0.261859	0.439666		108.85	112.97	154.55	118.59	86.46	100.92
ENSG00000054267	ARID4B	51742	1	1580.02	1428.92	0.142608	0.0701871	2.03183	0.0421707	0.106255		1465.66	1465.55	1808.84	1387.88	1516.95	1381.92
ENSG00000054277	OPN3	23596	1	331.925	314.257	0.0803552	0.077351	1.03884	0.29888	0.482524		338.64	336.59	320.55	315.01	336.99	290.77
ENSG00000054282	SDCCAG8	10806	1	537.858	483.066	0.154214	0.0726852	2.12167	0.0338658	0.0890294		530.63	547.73	535.21	504.01	473.56	471.63
ENSG00000054356	PTPRN	5798	2	0.252	0.327	-0.19643	0.795822	-0.246826	0.805043	0.913339		0.76	0	0	0	0.98	0
ENSG00000054392	HHAT	55733	1	121.955	129.619	-0.0800976	0.130424	-0.61413	0.539129	0.719475		118.67	135.57	111.62	110.25	127.72	150.88
ENSG00000054523	KIF1B	23095	1	2994.12	2414.71	0.308163	0.144548	2.1319	0.033015	0.0872204		2514.83	2447.26	4020.29	2244.89	2630.1	2369.15
ENSG00000054598	FOXC1	2296	6	1589.42	1777.8	-0.160629	0.0604203	-2.65852	0.00784849	0.0260667		1644.05	1586.32	1537.9	1750.14	1814.64	1768.62
ENSG00000054611	TBC1D22A	25771	22	953.342	885.197	0.107229	0.0632361	1.6957	0.0899434	0.195981		955.44	941.97	962.62	852.37	842.97	960.25
ENSG00000054654	SYNE2	23224	14	2110.27	1246.59	0.736691	0.355942	2.0697	0.0384807	0.0986732		1284.25	1229.47	3817.08	1024.7	1513.02	1202.06
ENSG00000054690	PLEKHH1	57475	14	107.931	102.028	0.0765188	0.124184	0.616171	0.537782	0.71851		99.02	112.2	112.58	100.99	102.18	102.92
ENSG00000054793	ATP9A	10079	20	4981.22	4583.95	0.119003	0.0768302	1.54892	0.121402	0.248485		4524.72	4492.48	5926.44	4407.32	4820.05	4524.47
ENSG00000054796	SPO11	23626	20	0	0							0	0	0	0	0	0
ENSG00000054803	CBLN4	140689	20	0	0							0	0	0	0	0	0
ENSG00000054938	CHRDL2	25884	11	0	0.327	-0.507541	0.857064	-0.592185	0.553727	0.732614		0	0	0	0	0.98	0
ENSG00000054965	FAM168A	23201	11	3006.76	2583.56	0.217743	0.0434227	5.01449	5.31754e-07	4.5501e-06		2987.25	2865.65	3167.38	2524.69	2692.98	2533.03
ENSG00000054967	RELT	84957	11	960.305	1339.64	-0.47823	0.079103	-6.04566	1.48796e-09	1.86517e-08		1006.84	980.15	893.93	1350.82	1339.12	1328.96
ENSG00000054983	GALC	2581	14	691.299	604.218	0.192534	0.0672523	2.86286	0.00419839	0.0152769		692.39	666.94	714.57	596.66	648.44	567.56
ENSG00000055044	NOP58	51602	2	3677.05	4421.99	-0.266817	0.0388732	-6.86379	6.70567e-12	1.13567e-10		3576.09	3658.03	3797.04	4462.91	4285.58	4517.48
ENSG00000055070	SZRD1	26099	1	7486.14	7598.73	-0.0216954	0.0375621	-0.577587	0.563543	0.738883		7292.77	7605.9	7559.74	7630.58	7598.5	7567.1
ENSG00000055118	KCNH2	3757	7	83.95	61.772	0.442551	0.221575	1.9973	0.0457929	0.113499		91.46	80.25	80.14	55.59	68.77	60.95
ENSG00000055130	CUL1	8454	7	2383.59	2302.88	0.048447	0.0486038	0.996774	0.318874	0.505207		2351.56	2301.56	2497.65	2373.67	2198.79	2336.18
ENSG00000055147	FAM114A2	10827	5	445.456	422.186	0.0759836	0.082424	0.921863	0.3566	0.545363		430.1	455.01	451.26	439.16	407.73	419.67
ENSG00000055163	CYFIP2	26999	5	390.892	223.17	0.807294	0.0810052	9.96596	2.14798e-23	9.18152e-22		364.34	415.28	393.06	216.8	230.88	221.83
ENSG00000055208	TAB2	23118	6	3384.55	3056.18	0.146562	0.044353	3.30444	0.000951652	0.00413853		3241.23	3406.37	3506.06	3002.76	3074.18	3091.59
ENSG00000055211	GINM1	116254	6	966.51	982.455	-0.0252227	0.0554738	-0.454676	0.649342	0.804975		951.66	940.41	1007.46	973.74	987.39	986.23
ENSG00000055332	EIF2AK2	5610	2	7959.64	12927.7	-0.699278	0.0754168	-9.27217	1.8239e-20	6.40927e-19		6898.2	7658.88	9321.84	12821.7	13853	12108.6
ENSG00000055483	USP36	57602	17	3990.33	5059.65	-0.342273	0.0452486	-7.56427	3.90035e-14	8.31706e-13		4077.24	3947.87	3945.87	5193.91	4935.98	5049.06
ENSG00000055609	KMT2C	58508	7	2632.37	2406.07	0.127018	0.278365	0.456301	0.648173	0.804342		1823.19	1774.09	4299.82	2149.46	2891.44	2177.3
ENSG00000055732	MCOLN3	55283	1	174.08	180.586	-0.0466081	0.152769	-0.30509	0.760298	0.886093		198.04	187.77	136.43	189.93	169.97	181.86
ENSG00000055813	CCDC85A	114800	2	4.319	2.847	0.487699	0.94265	0.51737	0.604898			6.8	2.34	3.82	5.56	0.98	2
ENSG00000055917	PUM2	23369	2	4101.22	3499.37	0.227798	0.0599835	3.79767	0.000146063	0.000784449		3826.29	3936.18	4541.19	3511.4	3626.33	3360.38
ENSG00000055950	MRPL43	84545	10	1215.67	1209.89	0.00857169	0.0482673	0.177588	0.859047	0.944624		1196.56	1277	1173.46	1184.06	1200.59	1245.03
ENSG00000055955	ITIH4	3700	3	2.675	4.192	-0.536489	0.774911	-0.692323	0.488735			3.78	2.34	1.91	4.63	2.95	5
ENSG00000055957	ITIH1	3697	3	0.504	0.333	0.0788557	0.648688	0.121562	0.903246			1.51	0	0	0	0	1
ENSG00000056050	HPF1	54969	4	518.783	497.529	0.0591033	0.0859083	0.687981	0.491465	0.677117		502.66	516.57	537.12	492.89	500.08	499.61
ENSG00000056097	ZFR	51663	5	5018.52	4350.41	0.205208	0.0464003	4.42255	9.75421e-06	6.67777e-05		4879.23	4786.99	5389.32	4280.39	4476.18	4294.65
ENSG00000056277	ZNF280C	55609	X	566.102	610.354	-0.11162	0.0784316	-1.42315	0.154692	0.299689		550.28	529.81	618.21	608.7	626.82	595.54
ENSG00000056291	NPFFR2	10886	4	0.318	0.327	-0.172723	0.931483	-0.185428	0.852894	0.941112		0	0	0.95	0	0.98	0
ENSG00000056487	PHF21B	112885	22	7.029	3.223	0.927511	0.523287	1.77247	0.0763168	0.171898		4.54	7.01	9.54	3.71	1.96	4
ENSG00000056558	TRAF1	7185	9	924.666	2157.69	-1.22158	0.0690636	-17.6877	5.21224e-70	1.3041e-67		907.06	948.21	918.73	2261.57	2124.12	2087.37
ENSG00000056586	RC3H2	54542	9	3195.78	3003.74	0.0882171	0.0795701	1.10867	0.267572	0.44623		2929.81	2892.92	3764.61	2933.27	3184.22	2893.74
ENSG00000056736	IL17RB	55540	3	250.216	229.175	0.126526	0.145741	0.868161	0.385306	0.574424		262.29	246.99	241.37	260.34	204.36	222.83
ENSG00000056972	TRAF3IP2	10758	6	617.863	667.451	-0.11347	0.0686659	-1.6525	0.0984332	0.210496		597.9	606.94	648.74	672.63	659.24	670.48
ENSG00000056998	GYG2	8908	X	267.436	116.35	1.19974	0.111708	10.7399	6.60999e-27	3.58487e-25		280.43	271.92	249.96	111.18	113.97	123.9
ENSG00000057019	DCBLD2	131566	3	12236.6	16736.8	-0.4518	0.0536126	-8.42711	3.54293e-17	9.82025e-16		11726.8	11798.4	13184.7	16663.9	17733.8	15812.7
ENSG00000057149	SERPINB3	6317	18	0	0	0	1.03739	0	1			0	0	0	0	0	0
ENSG00000057252	SOAT1	6646	1	2145.39	2114.61	0.0196625	0.0451864	0.435142	0.663459	0.815953		2064.32	2144.17	2227.66	2119.81	2093.66	2130.34
ENSG00000057294	PKP2	5318	12	1364.56	1272.73	0.0978342	0.0630169	1.55251	0.120541	0.247154		1280.47	1297.26	1515.96	1271.15	1288.03	1259.02
ENSG00000057468	MSH4	4438	1	0.771	1.26	-0.400062	1.02562	-0.39007	0.696485			0.76	1.56	0	2.78	0	1
ENSG00000057593	F7	2155	13	0	0	0	0.992694	0	1	1		0	0	0	0	0	0
ENSG00000057608	GDI2	2665	10	4384.71	3792.33	0.209157	0.0464247	4.5053	6.62801e-06	4.69161e-05		4323.66	4390.42	4440.06	3746.73	3800.23	3830.01
ENSG00000057657	PRDM1	639	6	226.31	336.834	-0.569701	0.0973033	-5.8549	4.77283e-09	5.59764e-08		236.59	226.73	215.61	335.39	314.39	360.72
ENSG00000057663	ATG5	9474	6	801.571	841.646	-0.071201	0.0668111	-1.06571	0.286556	0.468726		767.22	831.34	806.16	881.09	813.49	830.35
ENSG00000057704	TMCC3	57458	12	299.845	636.979	-1.08962	0.108323	-10.059	8.38226e-24	3.76814e-22		285.72	270.36	343.45	658.74	634.68	617.52
ENSG00000057757	PITHD1	57095	1	1981.79	2014.34	-0.0242412	0.0509771	-0.475531	0.634408	0.792694		1987.98	1890.96	2066.43	1984.54	1956.12	2102.36
ENSG00000057935	MTA3	57504	2	1679.07	1488.55	0.173806	0.0462225	3.7602	0.000169778	0.000897685		1693.18	1661.11	1682.91	1480.53	1439.33	1545.8
ENSG00000058056	USP13	8975	3	1198	972.781	0.297494	0.0630062	4.72166	2.33924e-06	1.8079e-05		1130.05	1153.12	1310.84	972.82	994.27	951.26
ENSG00000058063	ATP11B	23200	3	2853.32	2286.79	0.317926	0.0731376	4.34696	1.38037e-05	9.18205e-05		2652.4	2765.92	3141.62	2367.19	2363.85	2129.34
ENSG00000058085	LAMC2	3918	1	29552.5	36725.9	-0.313305	0.0628733	-4.98312	6.25666e-07	5.29095e-06		29178.7	28055.8	31422.9	37039.3	37393.2	35745.1
ENSG00000058091	CDK14	5218	7	416.845	493.622	-0.246204	0.102343	-2.40567	0.0161429	0.0480218		377.94	422.29	450.3	515.13	499.1	466.64
ENSG00000058262	SEC61A1	29927	3	9933.11	9791.28	0.0206606	0.0316849	0.652066	0.514359	0.698303		10050.2	9704.1	10045	9733.72	9767.81	9872.31
ENSG00000058272	PPP1R12A	4659	12	3724.36	3699.2	0.00863284	0.0680794	0.126806	0.899094	0.968569		3439.27	3432.08	4301.73	3679.1	3911.25	3507.27
ENSG00000058335	RASGRF1	5923	15	0.512	0.333	0.172794	0.901347	0.191707	0.847972	0.938336		0.76	0.78	0	0	0	1
ENSG00000058404	CAMK2B	816	7	4.369	2.631	0.642153	0.723594	0.887449	0.374837			7.56	0.78	4.77	0	5.89	2
ENSG00000058453	CROCC	9696	1	445.298	452.475	-0.0185704	0.0950113	-0.195455	0.845037	0.937071		483.77	466.7	385.43	442.86	452.92	461.64
ENSG00000058600	POLR3E	55718	16	2673.43	2684.76	-0.00477098	0.0504798	-0.0945126	0.924702	0.984233		2771.07	2736.32	2512.92	2595.1	2730.31	2728.87
ENSG00000058668	ATP2B4	493	1	4409.53	5255.88	-0.253448	0.102242	-2.47891	0.0131786	0.0405139		3793.78	3831.78	5603.02	5271.74	5683.65	4812.25
ENSG00000058673	ZC3H11A	9877	1	16.835	15.037	0.132015	0.374986	0.352052	0.724799	0.862506		14.36	13.25	22.9	20.38	14.74	9.99
ENSG00000058729	RIOK2	55781	5	705.635	821.337	-0.219087	0.0706087	-3.10284	0.00191675	0.00767885		707.51	687.2	722.2	799.56	777.14	887.31
ENSG00000058799	YIPF1	54432	1	375.452	409.128	-0.121108	0.0828138	-1.46242	0.143627	0.282956		402.13	360.74	363.49	394.69	390.04	442.65
ENSG00000058804	NDC1	55706	1	2614.64	2003.87	0.381743	0.0597347	6.39064	1.65196e-10	2.35555e-09		2434.7	2478.42	2930.78	2029.02	2011.14	1971.46
ENSG00000058866	DGKG	1608	3	450.408	510.545	-0.185141	0.0762997	-2.4265	0.0152452	0.0457869		416.49	447.22	487.51	526.25	517.77	487.62
ENSG00000059122	FLYWCH1	84256	16	1654.12	1868.83	-0.174501	0.0832774	-2.09541	0.0361343	0.0937325		1703.01	1813.04	1446.31	1860.39	1934.5	1811.59
ENSG00000059145	UNKL	64718	16	896.824	914.53	-0.0242313	0.0731397	-0.331302	0.740417	0.873282		974.33	935.74	780.4	858.86	926.48	958.25
ENSG00000059377	TBXAS1	6916	7	132.229	128.934	0.0402245	0.126524	0.317919	0.750547	0.88017		139.08	131.67	125.93	124.15	125.76	136.89
ENSG00000059378	PARP12	64761	7	2165.99	5003.16	-1.20626	0.0439172	-27.4667	4.38492e-166	5.14269e-163		2201.89	2218.19	2077.88	5032.7	4951.7	5025.08
ENSG00000059573	ALDH18A1	5832	10	2687.4	2257.71	0.250869	0.0461526	5.43564	5.46008e-08	5.46153e-07		2669.78	2646.72	2745.7	2251.37	2152.61	2369.15
ENSG00000059588	TARBP1	6894	1	829.565	738.175	0.170695	0.0713271	2.39313	0.0167053	0.0494986		910.08	825.88	752.73	767.13	731.95	715.44
ENSG00000059691	GATB	5188	4	692.74	694.824	-0.00705675	0.068185	-0.103494	0.917571	0.979532		659.89	685.64	732.7	720.81	661.21	702.45
ENSG00000059728	MXD1	4084	2	1983.38	2899.55	-0.547802	0.0546021	-10.0326	1.09565e-23	4.8376e-22		1938.09	2025.75	1986.29	2988.86	2860	2849.78
ENSG00000059758	CDK17	5128	12	1110.97	1231.99	-0.150242	0.0638068	-2.35463	0.0185411	0.0539082		1100.57	1079.88	1152.47	1264.66	1220.24	1211.06
ENSG00000059769	DNAJC25	548645	9	442.554	432.973	0.0320264	0.101697	0.314919	0.752823	0.881494		439.17	453.46	435.04	439.16	385.13	474.63
ENSG00000059804	SLC2A3	6515	12	136.338	200.498	-0.549404	0.09735	-5.64359	1.66537e-08	1.81268e-07		143.62	139.46	125.93	214.95	184.71	201.84
ENSG00000059915	PSD	5662	10	8.095	11.378	-0.478588	0.3982	-1.20188	0.22941	0.400469		7.56	6.23	10.49	8.34	10.81	14.99
ENSG00000060069	CTDP1	9150	18	733.373	731.465	0.00513613	0.0710481	0.0722909	0.94237	0.993866		726.4	753.42	720.29	667.07	790.9	736.43
ENSG00000060138	YBX3	8531	12	3291.53	2903.57	0.181515	0.0691476	2.62504	0.00866382	0.0282856		3517.89	3391.57	2965.13	2921.23	2815.79	2973.68
ENSG00000060140	STYK1	55359	12	295.51	360.243	-0.287229	0.11611	-2.47377	0.0133695	0.0410067		287.24	288.28	311.01	393.76	322.25	364.72
ENSG00000060237	WNK1	65125	12	5036.95	4392.54	0.196276	0.134485	1.45946	0.144439	0.284227		4318.37	4256.4	6536.07	4116.4	4909.45	4151.76
ENSG00000060303	RPS17P5		6	0.822	0.642	0.182815	1.03591	0.176479	0.859918			1.51	0	0.95	0.93	0	1
ENSG00000060339	CCAR1	55749	10	2502.3	2360.84	0.0832358	0.0447338	1.86069	0.0627877	0.146799		2486.1	2444.92	2575.88	2372.74	2260.69	2449.09
ENSG00000060491	OGFR	11054	20	2644.48	3615.33	-0.449524	0.0672852	-6.68088	2.37507e-11	3.76739e-10		2805.84	2759.69	2367.91	3503.06	3714.76	3628.17
ENSG00000060558	GNA15	2769	19	436.574	428.885	0.0258884	0.131389	0.197036	0.8438	0.936363		411.96	458.91	438.85	414.14	457.84	414.68
ENSG00000060566	CREB3L3	84699	19	13.158	17.78	-0.418565	0.410011	-1.02086	0.307319	0.492555		12.09	14.02	13.36	17.6	13.75	21.98
ENSG00000060642	PIGV	55650	1	550.141	552.317	-0.00430183	0.0736658	-0.0583966	0.953433	1		539.7	581.23	529.49	554.04	541.35	561.56
ENSG00000060656	PTPRU	10076	1	3257.33	3223.64	0.0153126	0.0541614	0.282721	0.77739	0.89732		3281.29	3291.84	3198.87	3128.76	3444.57	3097.59
ENSG00000060688	SNRNP40	9410	1	2503.76	2468.01	0.0203783	0.044124	0.461843	0.644194	0.801187		2424.12	2536.08	2551.08	2436.67	2390.37	2576.99
ENSG00000060709	RIMBP2	23504	12	0	0	0	1.00732	0	1			0	0	0	0	0	0
ENSG00000060718	COL11A1	1301	1	0.57	0.994	-0.450272	0.782712	-0.575271	0.565108	0.739436		0.76	0	0.95	0	0.98	2
ENSG00000060749	QSER1	79832	11	1708.7	1208.32	0.496354	0.13809	3.59443	0.000325103	0.00160457		1412.75	1460.87	2252.47	1216.48	1328.31	1080.16
ENSG00000060762	MPC1	51660	6	222.331	196.427	0.18091	0.13911	1.30048	0.193435	0.353094		221.47	242.31	203.21	188.08	204.36	196.85
ENSG00000060971	ACAA1	30	3	1184.4	1138.54	0.0589243	0.0796645	0.739655	0.459509	0.646321		1291.05	1185.06	1077.1	1061.76	1131.82	1222.05
ENSG00000060982	BCAT1	586	12	1784.67	1243.81	0.518303	0.0824514	6.28617	3.25402e-10	4.48983e-09		1588.11	1698.51	2067.39	1267.44	1294.91	1169.09
ENSG00000061273	HDAC7	51564	12	3757.13	3669.78	0.0345569	0.0652766	0.529392	0.596534	0.763496		3951.01	3892.55	3427.83	3691.14	3757.99	3560.22
ENSG00000061337	LZTS1	11178	8	0.512	0.309	0.195713	0.928792	0.210718	0.833107			0.76	0.78	0	0.93	0	0
ENSG00000061455	PRDM6	93166	5	10.131	7.136	0.474244	0.5694	0.832883	0.404911			9.07	7.01	14.31	6.49	3.93	10.99
ENSG00000061492	WNT8A	7478	5	0.252	0	0.0788557	0.648688	0.121562	0.903246			0.76	0	0	0	0	0
ENSG00000061656	SPAG4	6676	20	427.986	380.517	0.170581	0.105133	1.62253	0.10469	0.22098		456.55	423.85	403.56	397.46	371.38	372.71
ENSG00000061676	NCKAP1	10787	2	8066.67	6352.05	0.344071	0.0589141	5.8402	5.21369e-09	6.09944e-08		7660.89	7832.63	8706.49	6408.54	6598.33	6049.28
ENSG00000061794	MRPS35	60488	12	2879.61	2621.39	0.134999	0.0645471	2.09148	0.0364848	0.0944068		2747.64	2927.98	2963.22	2644.21	2636.98	2582.99
ENSG00000061918	GUCY1B1	2983	4	575.138	592.42	-0.0429235	0.109831	-0.390814	0.695935	0.84139		545.75	584.35	595.32	585.54	607.17	584.54
ENSG00000061936	SFSWAP	6433	12	3711.31	4227.61	-0.187002	0.044589	-4.1939	2.74203e-05	0.000171972		3772.62	3850.48	3510.83	4278.54	4172.59	4231.7
ENSG00000061938	TNK2	10188	3	1188.97	1131.84	0.0723173	0.101411	0.713111	0.475777	0.662312		1266.86	1245.83	1054.2	1024.7	1250.7	1120.13
ENSG00000061987	MON2	23041	12	2079.08	1887.18	0.138105	0.0720413	1.91702	0.0552349	0.132272		1957.74	1939.26	2340.24	1862.25	1978.71	1820.58
ENSG00000062038	CDH3	1001	16	15345.2	19367.8	-0.335776	0.0310741	-10.8057	3.23647e-27	1.79151e-25		15401.1	15348.9	15285.5	19364.6	19405	19333.9
ENSG00000062096	ARSF	416	X	0	0	0	0.648688	0	1			0	0	0	0	0	0
ENSG00000062194	GPBP1	65056	5	3085.97	3345.27	-0.117306	0.0603675	-1.94319	0.0519928	0.12581		2954	2955.25	3348.65	3410.41	3309.97	3315.42
ENSG00000062282	DGAT2	84649	11	101.102	122.753	-0.278939	0.14135	-1.97339	0.0484508	0.118893		102.8	101.29	99.22	132.49	119.86	115.91
ENSG00000062370	ZNF112	7771	19	192.544	239.423	-0.314068	0.119861	-2.62027	0.00878591	0.0286378		201.82	183.1	192.71	260.34	218.11	239.81
ENSG00000062485	CS	1431	12	8126.69	7432.25	0.129037	0.0290801	4.4373	9.10924e-06	6.27514e-05		8153.72	8176.22	8050.11	7475.86	7127.89	7693
ENSG00000062524	LTK	4058	15	45.071	48.596	-0.0947517	0.226445	-0.418431	0.675632	0.825459		52.91	49.86	32.44	54.66	47.16	43.97
ENSG00000062582	MRPS24	64951	7	42.495	61.334	-0.526418	0.182534	-2.88394	0.00392736	0.0144052		43.09	40.51	43.89	60.22	65.83	57.95
ENSG00000062598	ELMO2	63916	20	1319.02	1407.5	-0.0936653	0.0467075	-2.00536	0.0449249	0.111717		1339.43	1297.26	1320.38	1422.16	1376.45	1423.89
ENSG00000062650	WAPL	23063	10	2080.86	1952.33	0.0900594	0.0515497	1.74704	0.0806305	0.179674		1990.24	2000.81	2251.51	1942.85	1982.64	1931.49
ENSG00000062716	VMP1	81671	17	12257.5	16123.7	-0.394632	0.0848093	-4.65317	3.26868e-06	2.45249e-05		13921.9	12913.4	9937.19	17770.1	14908.1	15692.8
ENSG00000062725	APPBP2	10513	17	1518.43	1775.2	-0.226335	0.0613472	-3.68941	0.000224778	0.00115182		1477.75	1496.71	1580.83	1839.09	1745.87	1740.64
ENSG00000062822	POLD1	5424	19	3552.37	3582.55	-0.0115243	0.0722022	-0.159611	0.873188	0.952859		3722.73	3733.61	3200.77	3512.33	3813	3422.33
ENSG00000063015	SEZ6	124925	17	0.822	0.309	0.646071	1.03648	0.623331	0.533067			1.51	0	0.95	0.93	0	0
ENSG00000063046	EIF4B	1975	12	15974.5	12851.6	0.313354	0.0380659	8.23189	1.84283e-16	4.81625e-15		15282.5	15513.3	17127.7	12762.4	12581.6	13210.7
ENSG00000063127	SLC6A16	28968	19	34.256	52.649	-0.603916	0.192183	-3.14239	0.00167573	0.00684334		32.5	39.74	30.53	51.88	50.11	55.96
ENSG00000063169	BICRA	29998	19	668.585	689.998	-0.0441849	0.0906929	-0.487193	0.626122	0.78665		722.63	633.44	649.7	650.4	721.14	698.46
ENSG00000063176	SPHK2	56848	19	686.892	729.362	-0.0836326	0.0764102	-1.09452	0.273727	0.453552		722.63	716.02	622.03	735.63	728.02	724.44
ENSG00000063177	RPL18	6141	19	15831.4	14303.6	0.146657	0.0405814	3.6139	0.000301627	0.00150094		16179.7	16377.4	14937.3	14054	14407.1	14449.7
ENSG00000063180	CA11	770	19	361.842	329.93	0.134314	0.106284	1.26373	0.206326	0.370914		365.85	381	338.68	347.43	301.62	340.73
ENSG00000063241	ISOC2	79763	19	1151.46	1007.31	0.194296	0.0645098	3.01188	0.00259634	0.00998776		1162.55	1188.96	1102.86	956.14	1032.59	1033.19
ENSG00000063244	U2AF2	11338	19	9913.33	9398.75	0.0770966	0.0461053	1.67219	0.0944876	0.203988		10039.7	10099.9	9600.41	9181.53	9468.16	9546.56
ENSG00000063245	EPN1	29924	19	7008.81	6425.48	0.125594	0.0673613	1.86448	0.0622544	0.145752		7206.6	7285.67	6534.16	5953.63	6790.9	6531.91
ENSG00000063322	MED29	55588	19	2208.87	2498.42	-0.178576	0.0434121	-4.11352	3.89676e-05	0.00023672		2081.71	2265.72	2279.18	2452.42	2535.78	2507.05
ENSG00000063438	AHRR	57491	5	17.876	18.19	-0.0111935	0.317692	-0.0352336	0.971893	1		24.94	12.47	16.22	12.97	21.61	19.98
ENSG00000063515	GSC2	2928	22	0	0	0	0.980397	0	1			0	0	0	0	0	0
ENSG00000063587				426.705	366.872	0.210885	0.101199	2.08387	0.037172	0.0958845		365.85	398.14	516.13	366.89	392.99	340.73
ENSG00000063601	MTMR1	8776	X	2208.56	1836.31	0.266012	0.0409841	6.49062	8.54828e-11	1.26905e-09		2215.5	2181.57	2228.62	1825.19	1840.18	1843.56
ENSG00000063660	GPC1	2817	2	572.259	542.91	0.0783126	0.0751976	1.04142	0.297679	0.481049		591.86	594.48	530.44	537.37	573.77	517.6
ENSG00000063761	ADCK1	57143	14	182.509	180.61	0.016457	0.115134	0.142938	0.88634	0.960342		185.95	186.99	174.59	191.78	157.2	192.85
ENSG00000063854	HAGH	3029	16	700.931	585.462	0.26268	0.0759689	3.45773	0.000544755	0.0025353		736.23	729.27	637.29	558.67	607.17	590.54
ENSG00000063978	RNF4	6047	4	3987.69	4222.95	-0.0831844	0.0382872	-2.17264	0.0298071	0.0801684		3934.38	3941.64	4087.07	4237.77	4125.43	4305.64
ENSG00000064012	CASP8	841	2	1432.32	1841.21	-0.361657	0.048477	-7.46038	8.62728e-14	1.78491e-12		1452.81	1448.41	1395.75	1937.29	1750.78	1835.57
ENSG00000064042	LIMCH1	22998	4	3240.26	2485.13	0.381479	0.0490609	7.77562	7.50787e-15	1.70977e-13		3102.15	3146.92	3471.72	2423.7	2602.59	2429.11
ENSG00000064102	INTS13	55726	12	1779.23	1741.79	0.0299338	0.0481073	0.62223	0.533791	0.715266		1774.82	1782.66	1780.22	1856.69	1682.01	1686.69
ENSG00000064115	TM7SF3	51768	12	3357.08	2667.14	0.331288	0.0414435	7.99374	1.3091e-15	3.24508e-14		3297.17	3368.19	3405.89	2710.91	2602.59	2687.9
ENSG00000064195	DLX3	1747	17	92.607	127.987	-0.459121	0.263972	-1.73928	0.0819856	0.182187		97.51	93.5	86.82	120.44	133.62	129.9
ENSG00000064199	SPA17	53340	11	789.681	504.424	0.644807	0.0833156	7.73932	9.99469e-15	2.24074e-13		758.15	818.09	792.8	535.51	497.13	480.63
ENSG00000064201	TSPAN32	10077	11	68.526	80.635	-0.224988	0.342697	-0.656522	0.511488	0.695478		68.79	83.37	53.43	67.63	93.34	80.94
ENSG00000064205	CCN5	8839	20	15.569	11.707	0.396632	0.302516	1.31111	0.189821	0.348225		18.9	16.36	11.45	7.41	15.72	11.99
ENSG00000064218	DMRT3	58524	9	0	0							0	0	0	0	0	0
ENSG00000064225	ST3GAL6	10402	3	18.528	19.412	-0.0755165	0.291468	-0.25909	0.795566	0.908519		15.12	19.48	20.99	17.6	19.65	20.98
ENSG00000064270	ATP2C2	9914	16	895.021	734.996	0.28487	0.104319	2.73077	0.00631866	0.021724		912.35	921.71	851	709.69	793.84	701.45
ENSG00000064300	NGFR	4804	17	21.319	12.863	0.711898	0.382555	1.86091	0.0627574	0.146747		24.19	22.59	17.17	14.82	12.77	10.99
ENSG00000064309	CDON	50937	11	10.049	4.559	0.977743	0.411751	2.3746	0.0175681	0.0515908		8.31	13.25	8.59	1.85	9.82	2
ENSG00000064313	TAF2	6873	8	2533.13	2437.9	0.0544508	0.0532771	1.02203	0.306767	0.491881		2535.24	2447.26	2616.91	2539.51	2410.02	2364.16
ENSG00000064393	HIPK2	28996	7	6909.21	5527.66	0.317988	0.22384	1.4206	0.155432	0.300717		5093.9	5299.66	10334.1	4856.67	6659.25	5067.05
ENSG00000064419	TNPO3	23534	7	4241.39	4086.39	0.0528091	0.0497045	1.06246	0.288026	0.470291		4064.39	4075.65	4584.12	4020.97	4009.5	4228.7
ENSG00000064489	BORCS8-MEF2B		19	0.578	1.563	-0.840328	1.04427	-0.804705	0.42099			0	0.78	0.95	3.71	0.98	0
ENSG00000064490	RFXANK	8625	19	840.368	796.013	0.0803462	0.0598064	1.34344	0.17913	0.334199		844.32	877.3	799.48	792.15	754.54	841.34
ENSG00000064545	TMEM161A	54929	19	744.57	770.88	-0.0461038	0.071245	-0.647116	0.517557	0.701217		804.26	772.12	657.33	765.28	787.95	759.41
ENSG00000064547	LPAR2	9170	19	227.064	291.66	-0.352499	0.127544	-2.76373	0.00571441	0.0198502		262.29	237.64	181.27	274.24	280.99	319.75
ENSG00000064601	CTSA	5476	20	5713.16	6174.85	-0.111268	0.0427245	-2.60432	0.00920564	0.0297937		5889.09	5918.3	5332.08	6163.02	6147.38	6214.16
ENSG00000064607	SUGP2	10147	19	3143.91	3366.41	-0.0975739	0.0645116	-1.5125	0.130407	0.262759		3457.41	3195.23	2779.09	3569.77	3194.04	3335.4
ENSG00000064651	SLC12A2	6558	5	1178.84	575.538	1.03146	0.104827	9.83964	7.59806e-23	3.1267e-21		1121.73	1146.88	1267.91	512.35	632.72	581.55
ENSG00000064652	SNX24	28966	5	270.584	209.468	0.370717	0.100405	3.69221	0.000222314	0.00114106		272.12	282.05	257.59	207.53	223.02	197.85
ENSG00000064655	EYA2	2139	20	0	0.327	-0.530197	0.880244	-0.60233	0.546955	0.727039		0	0	0	0	0.98	0
ENSG00000064666	CNN2	1265	19	7306.58	6224.38	0.231541	0.0342906	6.75232	1.45503e-11	2.35376e-10		7169.56	7620.7	7129.47	6183.4	6246.61	6243.13
ENSG00000064687	ABCA7	10347	19	902.282	926.068	-0.0350998	0.104483	-0.335938	0.736918	0.870711		1030.27	941.97	734.6	935.76	945.15	897.3
ENSG00000064692	SNCAIP	9627	5	169.078	136.689	0.30736	0.229763	1.33773	0.180985	0.336697		166.29	185.43	155.51	159.36	122.81	127.9
ENSG00000064703	DDX20	11218	1	1015.95	1148.17	-0.177478	0.0578447	-3.06819	0.00215362	0.00849007		1018.18	975.47	1054.2	1142.36	1118.06	1184.08
ENSG00000064726	BTBD1	53339	15	2604.22	2706.44	-0.0559924	0.0519493	-1.07783	0.281111	0.46209		2481.57	2652.17	2678.92	2648.84	2770.59	2699.9
ENSG00000064763	FAR2	55711	12	0.578	0	0.840033	0.999428	0.840513	0.400621			0	0.78	0.95	0	0	0
ENSG00000064787	BCAS1	8537	20	468.076	211.857	1.14159	0.110725	10.3102	6.33983e-25	3.05827e-23		474.7	444.89	484.65	206.61	217.13	211.83
ENSG00000064835	POU1F1	5449	3	0	0.333	-0.613911	1.04463	-0.587685	0.556744			0	0	0	0	0	1
ENSG00000064886	CHI3L2	1117	1	4.838	3.187	0.534839	0.647452	0.826068	0.408766			6.8	3.9	3.82	4.63	3.93	1
ENSG00000064932	SBNO2	22904	19	6873.06	9267.77	-0.43052	0.0605532	-7.10978	1.16225e-12	2.1551e-11		7008.56	7252.95	6357.66	8943.42	9699.04	9160.86
ENSG00000064933	PMS1	5378	2	784.046	660.244	0.246425	0.0894582	2.75464	0.00587574	0.0203391		748.33	798.61	805.2	688.38	682.82	609.52
ENSG00000064961	HMG20B	10362	19	2297.12	2058.48	0.158872	0.083882	1.89399	0.0582264	0.138079		2393.89	2447.26	2050.21	1984.54	2160.47	2030.42
ENSG00000064989	CALCRL	10203	2	33.548	34.13	-0.0263809	0.409395	-0.0644386	0.948621	0.99736		31.75	28.83	40.07	37.06	36.35	28.98
ENSG00000064995	TAF11	6882	6	1324.5	1384.07	-0.0637192	0.0528907	-1.20473	0.228306	0.399009		1325.82	1320.63	1327.06	1418.46	1354.84	1378.93
ENSG00000064999	ANKS1A	23294	6	2387.27	2266.82	0.0735129	0.0501147	1.46689	0.142405	0.281318		2337.95	2293.77	2530.09	2224.51	2374.65	2201.28
ENSG00000065000	AP3D1	8943	19	5729.55	5221.57	0.134284	0.0500787	2.68146	0.00733027	0.0246378		5900.43	5809.22	5479	5121.64	5437.04	5106.02
ENSG00000065029	ZNF76	7629	6	1535.82	1451.38	0.0827613	0.066206	1.25006	0.211278	0.377333		1571.48	1601.12	1434.86	1446.25	1457.02	1450.87
ENSG00000065054	SLC9A3R2	9351	16	8971.45	9476.04	-0.078755	0.0523054	-1.50568	0.13215	0.265532		9004.09	9140.79	8769.45	9336.25	9573.28	9518.58
ENSG00000065057	NTHL1	4913	16	1782.34	1809.67	-0.0210689	0.0754985	-0.279064	0.780196	0.899341		1795.98	1856.67	1694.36	1667.68	1978.71	1782.61
ENSG00000065060	UHRF1BP1	54887	6	1211.17	1195.76	0.0156728	0.0903508	0.173466	0.862285	0.946355		1070.33	1106.37	1456.81	1233.16	1234.98	1119.13
ENSG00000065135	GNAI3	2773	1	3635.32	3423.18	0.0860908	0.0424688	2.02716	0.0426465	0.107202		3466.49	3697.77	3741.71	3397.44	3492.72	3379.37
ENSG00000065150	IPO5	3843	13	7808.4	6809.32	0.196988	0.0443924	4.43744	9.10367e-06	6.27361e-05		7596.64	7636.28	8192.26	6894.02	6714.27	6819.68
ENSG00000065154	OAT	4942	10	9665.31	5955.34	0.698565	0.0477098	14.642	1.51619e-48	2.01782e-46		9674.56	9837.34	9484.02	5673.83	5940.07	6252.13
ENSG00000065183	WDR3	10885	1	4616.98	5211.76	-0.175416	0.0528646	-3.31821	0.000905965	0.00396558		4510.36	4366.26	4974.32	5235.6	4996.89	5402.79
ENSG00000065243	PKN2	5586	1	2179.72	2118.88	0.0393449	0.0809175	0.486235	0.6268	0.78696		1947.16	2068.6	2523.41	2088.31	2306.86	1961.47
ENSG00000065268	WDR18	57418	19	1399.76	1261.4	0.151896	0.0685017	2.2174	0.0265958	0.0730595		1450.54	1456.98	1291.76	1173.86	1327.33	1283
ENSG00000065308	TRAM2	9697	6	2783.34	2933.79	-0.0772457	0.0542282	-1.42446	0.154315	0.299206		2688.68	2613.21	3048.13	2898.99	2932.7	2969.69
ENSG00000065320	NTN1	9423	17	2015.36	2295.37	-0.188068	0.0614137	-3.06231	0.00219637	0.0086332		1965.3	2000.04	2080.74	2278.24	2376.62	2231.26
ENSG00000065325	GLP2R	9340	17	495.359	487.971	0.0236258	0.0696567	0.339175	0.734478	0.869008		513.25	481.5	491.33	452.13	494.19	517.6
ENSG00000065328	MCM10	55388	10	1358.44	1300.73	0.0616047	0.062949	0.978644	0.327756	0.514121		1310.7	1356.47	1408.15	1323.03	1222.2	1356.94
ENSG00000065357	DGKA	1606	12	1045.96	1325.09	-0.337909	0.0757185	-4.4627	8.0932e-06	5.64149e-05		1166.33	1072.87	898.7	1344.34	1291.96	1338.96
ENSG00000065361	ERBB3	2065	12	4818.04	4013.65	0.263124	0.078659	3.34512	0.000822474	0.00363317		4889.82	4576.63	4987.67	3907.94	4260.03	3872.98
ENSG00000065371	ROPN1	54763	3	0	0	0	0.648688	0	1			0	0	0	0	0	0
ENSG00000065413	ANKRD44	91526	2	108.109	94.915	0.184945	0.155978	1.18571	0.235737	0.408497		112.63	98.17	113.53	94.5	94.32	95.93
ENSG00000065427	KARS1	3735	16	10238.7	9083.52	0.172606	0.039948	4.32077	1.55488e-05	0.000102377		10158.3	10249.5	10308.3	9093.51	8843.3	9313.74
ENSG00000065457	ADAT1	23536	16	1491.51	1552.8	-0.0597423	0.0496169	-1.20407	0.228562	0.399345		1493.63	1417.24	1563.66	1569.48	1563.13	1525.81
ENSG00000065485	PDIA5	10954	3	644.317	620.566	0.0545619	0.05747	0.949398	0.342418	0.529859		656.86	643.56	632.52	642.99	606.19	612.52
ENSG00000065491	TBC1D22B	55633	6	939.39	983.987	-0.0676684	0.0579604	-1.16749	0.243012	0.417363		936.54	929.51	952.12	998.76	1012.94	940.27
ENSG00000065518	NDUFB4	4710	3	2328.3	1803.29	0.369075	0.0578037	6.38497	1.71428e-10	2.44071e-09		2316.79	2413.75	2254.38	1745.51	1805.8	1858.55
ENSG00000065526	SPEN	23013	1	4638.89	4989.55	-0.10471	0.173275	-0.604304	0.545642	0.725808		3843.67	3717.24	6355.75	4628.75	5691.51	4648.38
ENSG00000065534	MYLK	4638	3	940.164	917.846	0.0312573	0.0858504	0.36409	0.715791	0.856239		831.47	871.85	1117.17	884.8	985.43	883.31
ENSG00000065548	ZC3H15	55854	2	3200.72	3120.4	0.0357741	0.0521747	0.685659	0.492928	0.678784		3001.62	3214.7	3385.86	3130.61	3024.07	3206.5
ENSG00000065559	MAP2K4	6416	17	1500.86	1139.68	0.395195	0.0583739	6.77006	1.28731e-11	2.09691e-10		1495.9	1400.1	1606.59	1130.32	1142.62	1146.11
ENSG00000065600	PACC1	55248	1	324.628	307.205	0.0798674	0.0886629	0.900798	0.367696	0.556824		322.01	321.78	330.09	280.73	329.13	311.76
ENSG00000065609	SNAP91	9892	6	11.208	15.239	-0.414825	0.562818	-0.737049	0.461093			13.61	8.57	11.45	12.04	17.68	15.99
ENSG00000065613	SLK	9748	10	3174.89	3087.16	0.0389987	0.0517429	0.753702	0.451028	0.637892		3058.31	2996.55	3469.81	3096.33	3169.48	2995.67
ENSG00000065615	CYB5R4	51167	6	1052.75	835.888	0.330587	0.0676744	4.88497	1.03444e-06	8.48024e-06		969.04	1059.62	1129.57	810.68	861.63	835.35
ENSG00000065618	COL17A1	1308	10	769.234	931.306	-0.276226	0.0808426	-3.41683	0.000633546	0.00289257		746.06	761.21	800.43	890.36	994.27	909.29
ENSG00000065621	GSTO2	119391	10	414.572	450.68	-0.119793	0.0930708	-1.28712	0.198052	0.359493		420.27	407.49	415.96	433.6	459.8	458.64
ENSG00000065665	SEC61A2	55176	10	353.917	347.854	0.0246805	0.086589	0.285031	0.77562	0.896353		382.48	327.24	352.04	359.48	374.32	309.76
ENSG00000065675	PRKCQ	5588	10	0	0	0	0.811322	0	1	1		0	0	0	0	0	0
ENSG00000065717	TLE2	7089	19	18.736	14.751	0.339875	0.28729	1.18304	0.236795	0.409762		19.65	24.15	12.4	19.46	10.81	13.99
ENSG00000065802	ASB1	51665	2	1738.59	1577.78	0.140085	0.0516035	2.71465	0.00663467	0.0226602		1733.24	1762.4	1720.12	1599.12	1544.46	1589.76
ENSG00000065809	FAM107B	83641	10	2863.26	2480.52	0.205504	0.0572551	3.58926	0.000331615	0.00163241		2654.67	2817.35	3117.77	2531.17	2450.3	2460.08
ENSG00000065833	ME1	4199	6	3588.31	2350.82	0.610271	0.0472168	12.9249	3.258e-38	2.95344e-36		3535.27	3748.41	3481.26	2337.54	2368.76	2346.17
ENSG00000065882	TBC1D1	23216	4	2530.06	2027.55	0.319349	0.0545211	5.85734	4.70353e-09	5.52327e-08		2458.14	2603.86	2528.18	1983.62	2038.65	2060.39
ENSG00000065883	CDK13	8621	7	1342.52	1425.1	-0.0886077	0.0613206	-1.44499	0.14846	0.290239		1314.48	1224.8	1488.29	1423.09	1441.3	1410.9
ENSG00000065911	MTHFD2	10797	2	5495.78	4424.03	0.312475	0.0546141	5.7215	1.0559e-08	1.18931e-07		5182.34	5556	5748.99	4252.6	4542.99	4476.51
ENSG00000065923	SLC9A7	84679	X	2980.85	3724.51	-0.322498	0.0568163	-5.67616	1.37754e-08	1.51877e-07		2895.04	2779.95	3267.56	3913.5	3711.81	3548.23
ENSG00000065970	FOXJ2	55810	12	887.495	813.962	0.12124	0.0758892	1.59759	0.110134	0.229834		817.11	836.01	1009.36	797.71	852.79	791.38
ENSG00000065978	YBX1	4904	1	16326.8	11858.7	0.461142	0.04897	9.41682	4.64935e-21	1.68904e-19		16093.5	16708.5	16178.5	11293.9	11835	12447.3
ENSG00000065989	PDE4A	5141	19	45.824	58.659	-0.329037	0.162758	-2.02164	0.0432139	0.10829		52.91	48.31	36.25	47.25	68.77	59.95
ENSG00000066027	PPP2R5A	5525	1	1026.83	954.129	0.104742	0.0508416	2.06016	0.0393828	0.100615		991.72	1047.93	1040.85	968.18	956.94	937.27
ENSG00000066032	CTNNA2	1496	2	3.117	2.946	0.0649354	0.798362	0.0813358	0.935175			3.02	1.56	4.77	0.93	4.91	3
ENSG00000066044	ELAVL1	1994	19	3047.93	2641.56	0.206007	0.0398563	5.16875	2.35669e-07	2.13022e-06		2920.74	3153.93	3069.12	2652.54	2624.2	2647.94
ENSG00000066056	TIE1	7075	1	0.771	1.297	-0.43766	1.03662	-0.4222	0.672879			0.76	1.56	0	0.93	1.96	1
ENSG00000066084	DIP2B	57609	12	3881.77	3760.56	0.0450815	0.136404	0.3305	0.741022	0.873722		3387.87	3173.41	5084.03	3522.52	4092.03	3667.14
ENSG00000066117	SMARCD1	6602	12	4331.1	4407.63	-0.0245228	0.031026	-0.790397	0.429296	0.616872		4423.43	4297.7	4272.15	4297.07	4411.33	4514.48
ENSG00000066135	KDM4A	9682	1	1053.54	992.375	0.0845013	0.056587	1.4933	0.135359	0.270473		1021.2	1013.65	1125.76	938.54	986.41	1052.18
ENSG00000066136	NFYC	4802	1	1463.7	1287.16	0.187437	0.0513168	3.65255	0.00025965	0.00131365		1504.97	1495.16	1390.98	1244.28	1275.26	1341.95
ENSG00000066185	ZMYND12	84217	1	13.391	23.307	-0.770779	0.390866	-1.97198	0.0486122	0.119197		9.07	18.7	12.4	21.31	20.63	27.98
ENSG00000066230	SLC9A3	6550	5	121.653	145.367	-0.260308	0.151023	-1.72364	0.0847734	0.187027		121.7	102.07	141.2	127.86	147.37	160.87
ENSG00000066248	NGEF	25791	2	1283.96	1507.04	-0.229535	0.066119	-3.47154	0.000517483	0.00242522		1352.28	1300.37	1199.22	1539.83	1489.44	1491.84
ENSG00000066279	ASPM	259266	1	3370.8	2139.37	0.652249	0.143816	4.5353	5.75205e-06	4.12762e-05		2917.71	2922.53	4272.15	2149.46	2464.06	1804.59
ENSG00000066294	CD84	8832	1	0	0	0	0.648688	0	1			0	0	0	0	0	0
ENSG00000066322	ELOVL1	64834	1	2438.82	2690.67	-0.141995	0.0449837	-3.15659	0.00159627	0.00654445		2498.2	2356.88	2461.4	2740.56	2661.54	2669.92
ENSG00000066336	SPI1	6688	11	0.504	0.327	0.226918	1.01411	0.223762	0.822943			1.51	0	0	0	0.98	0
ENSG00000066379	POLR1H	30834	6	848.85	972.672	-0.197316	0.0653659	-3.01864	0.0025391	0.00980578		840.54	832.11	873.89	993.2	919.6	1005.22
ENSG00000066382	MPPED2	744	11	0	0							0	0	0	0	0	0
ENSG00000066405	CLDN18	51208	3	0	0	0	0.648688	0	1			0	0	0	0	0	0
ENSG00000066422	ZBTB11	27107	3	1248.82	1262.45	-0.016987	0.0571853	-0.297051	0.766427	0.890141		1266.11	1190.52	1289.85	1307.28	1290	1190.07
ENSG00000066427	ATXN3	4287	14	652.772	639.808	0.0275311	0.0809487	0.340105	0.733777	0.868508		603.95	664.6	689.76	605.93	673	640.5
ENSG00000066455	GOLGA5	9950	14	2258.62	2138.07	0.0783279	0.0577739	1.35576	0.175174	0.32832		2161.83	2268.06	2345.96	2162.43	2106.44	2145.33
ENSG00000066468	FGFR2	2263	10	247.273	216.699	0.191311	0.136442	1.40214	0.160873	0.308418		247.93	256.33	237.55	228.84	200.43	220.83
ENSG00000066557	LRRC40	55631	1	797.799	631.268	0.335259	0.0931234	3.60016	0.000318018	0.00157373		742.28	779.13	871.98	632.79	645.49	615.52
ENSG00000066583	ISOC1	51015	5	1368.05	1170.12	0.224847	0.073562	3.05656	0.00223892	0.00877286		1323.55	1344.78	1435.82	1083.07	1220.24	1207.06
ENSG00000066629	EML1	2009	14	0.318	0	0.0186552	0.740237	0.0252017	0.979894	1		0	0	0.95	0	0	0
ENSG00000066651	TRMT11	60487	6	486.324	456.217	0.0931479	0.0783721	1.18853	0.234623	0.407055		470.16	516.57	472.25	455.83	438.19	474.63
ENSG00000066654	THUMPD1	55623	16	1871.46	1869.59	-0.000676325	0.0646945	-0.0104541	0.991659	1		1706.79	1798.24	2109.36	1874.29	1911.91	1822.58
ENSG00000066697	MSANTD3	91283	9	1407.93	1698.6	-0.271247	0.0616289	-4.40129	1.07607e-05	7.29761e-05		1375.71	1396.99	1451.08	1704.74	1659.41	1731.65
ENSG00000066735	KIF26A	26153	14	25.293	23.091	0.125877	0.236691	0.531821	0.59485	0.762248		22.68	26.49	26.71	15.75	25.54	27.98
ENSG00000066739	ATG2B	55102	14	806.38	760.745	0.081092	0.0932777	0.869361	0.38465	0.573809		745.3	733.16	940.67	718.03	854.76	709.45
ENSG00000066777	ARFGEF1	10565	8	4545.01	3660.74	0.310939	0.0732125	4.24708	2.16575e-05	0.000139037		4208.01	4142.65	5284.38	3631.85	3865.08	3485.28
ENSG00000066813	ACSM2B	348158	16	0	0							0	0	0	0	0	0
ENSG00000066827	ZFAT	57623	8	767.818	671.148	0.194381	0.0638362	3.045	0.0023268	0.00907363		772.51	761.99	768.95	652.25	688.72	672.48
ENSG00000066855	MTFR1	9650	8	1898.69	1707.83	0.151761	0.0585577	2.59165	0.00955156	0.0307647		1806.56	1921.34	1968.17	1752	1693.8	1677.69
ENSG00000066923	STAG3	10734	7	2702.73	2634.58	0.0372984	0.117729	0.316816	0.751383	0.880571		3098.37	2757.35	2252.47	2940.68	2409.04	2554.01
ENSG00000066926	FECH	2235	18	529.498	421.177	0.328137	0.0621171	5.28256	1.27393e-07	1.20066e-06		516.27	527.47	544.75	415.99	398.89	448.65
ENSG00000066933	MYO9A	4649	15	1216.4	948.091	0.355496	0.180395	1.97065	0.0487639	0.119506		950.9	959.11	1739.2	916.3	1027.67	900.3
ENSG00000067048	DDX3Y	8653	Y	1909.25	1663.03	0.198659	0.0492725	4.03184	5.53425e-05	0.000325958		1888.95	1913.55	1925.23	1702.89	1655.48	1630.73
ENSG00000067057	PFKP	5214	10	5849.39	6805.44	-0.218067	0.0459896	-4.74165	2.11984e-06	1.65195e-05		6015.33	5790.52	5742.31	6717.06	6982.48	6716.76
ENSG00000067064	IDI1	3422	10	1539.6	1116.81	0.462612	0.0634009	7.2966	2.95121e-13	5.84172e-12		1488.34	1583.98	1546.48	1102.52	1133.78	1114.13
ENSG00000067066	SP100	6672	2	2839.68	5536.58	-0.963413	0.0564824	-17.0569	3.10774e-65	7.02612e-63		2659.96	2850.07	3009.01	5501.51	5459.64	5648.6
ENSG00000067082	KLF6	1316	10	2978.64	4158.17	-0.479351	0.0605271	-7.91962	2.38245e-15	5.78354e-14		3226.11	3145.36	2564.44	4234.07	3994.76	4245.69
ENSG00000067113	PLPP1	8611	5	247.607	248.225	-0.0076656	0.0902872	-0.0849024	0.932339	0.988437		247.93	230.62	264.27	248.3	248.57	247.81
ENSG00000067141	NEO1	4756	15	11.123	9.61	0.159689	0.322038	0.495869	0.619987	0.782121		10.58	13.25	9.54	12.04	11.79	5
ENSG00000067167	TRAM1	23471	8	2565.37	2390.68	0.100598	0.0755186	1.3321	0.182827	0.339037		2324.34	2598.41	2773.37	2525.62	2519.08	2127.34
ENSG00000067177	PHKA1	5255	X	2246.94	2291.11	-0.0293935	0.0434767	-0.676076	0.498993	0.684524		2226.84	2152.75	2361.23	2272.68	2273.46	2327.19
ENSG00000067182	TNFRSF1A	7132	12	2595.1	2849.34	-0.133828	0.0415639	-3.21982	0.00128271	0.00540537		2623.67	2642.04	2519.6	2778.55	2934.67	2834.79
ENSG00000067191	CACNB1	782	17	534.009	536.4	-0.00399479	0.124274	-0.0321449	0.974356	1		588.08	570.33	443.62	546.63	562.96	499.61
ENSG00000067208	EVI5	7813	1	660.05	726.261	-0.142558	0.0985767	-1.44616	0.148131	0.289815		577.5	581.23	821.42	755.09	715.25	708.45
ENSG00000067221	STOML1	9399	15	267.797	303.599	-0.183072	0.0929541	-1.96949	0.0488966	0.119721		263.8	261.01	278.58	313.15	286.88	310.76
ENSG00000067225	PKM	5315	15	108055	104051	0.0544654	0.052477	1.03789	0.299321	0.482954		109525	109157	105483	99744.2	104693	107715
ENSG00000067248	DHX29	54505	5	1568.61	1311.43	0.257091	0.0535609	4.79998	1.58679e-06	1.26277e-05		1540.49	1526.32	1639.03	1283.19	1339.12	1311.98
ENSG00000067334	DNTTIP2	30836	1	3380.18	3860.59	-0.191829	0.0528628	-3.62881	0.000284729	0.00142498		3327.4	3355.73	3457.41	3838.45	3673.49	4069.83
ENSG00000067365	METTL22	79091	16	499.035	557.797	-0.157926	0.0842571	-1.87433	0.0608843	0.14317		554.82	490.07	452.21	617.04	517.77	538.58
ENSG00000067369	TP53BP1	7158	15	4345.96	3758.55	0.208379	0.0500981	4.15942	3.19051e-05	0.00019746		4216.32	4056.17	4765.39	3686.51	3809.07	3780.05
ENSG00000067445	TRO	7216	X	0.512	0	0.629533	0.932451	0.675138	0.499588	0.685112		0.76	0.78	0	0	0	0
ENSG00000067533	RRP15	51018	1	1161.22	1240	-0.0980953	0.0589246	-1.66476	0.0959605	0.206478		1119.46	1070.53	1293.67	1255.4	1200.59	1264.01
ENSG00000067560	RHOA	387	3	14774	12956.5	0.189458	0.031683	5.97979	2.23428e-09	2.74387e-08		14649	15054.4	14618.6	12877.3	12700.5	13291.6
ENSG00000067596	DHX8	1659	17	3236.86	3334.55	-0.0436519	0.0331535	-1.31666	0.187953	0.346083		3253.33	3130.56	3326.71	3311.28	3308.99	3383.36
ENSG00000067601	PMS2P4	5382	7	29.979	29.647	0.024968	0.238114	0.104857	0.916489	0.978767		35.53	29.61	24.8	30.57	34.39	23.98
ENSG00000067606	PRKCZ	5590	1	743.651	770.167	-0.0480302	0.0812717	-0.590984	0.554531	0.732956		796.7	754.98	679.27	758.8	767.32	784.39
ENSG00000067646	ZFY	7544	Y	190.668	216.596	-0.184943	0.119548	-1.54701	0.12186	0.249259		193.51	183.88	194.62	232.55	201.41	215.83
ENSG00000067704	IARS2	55699	1	6354.61	4760.18	0.416161	0.0433991	9.58916	8.88053e-22	3.37334e-20		6190.69	6262.67	6610.48	4774.21	4706.08	4800.26
ENSG00000067715	SYT1	6857	12	4109.06	3382.97	0.279573	0.0627791	4.45328	8.45666e-06	5.86869e-05		3796.05	4028.12	4503.03	3362.24	3520.23	3266.45
ENSG00000067798	NAV3	89795	12	78.152	244.769	-1.65205	0.160353	-10.3025	6.86321e-25	3.30226e-23		70.3	59.21	104.94	257.56	227.94	248.81
ENSG00000067829	IDH3G	3421	X	1810.96	1918.56	-0.081507	0.0656392	-1.24174	0.214332	0.381263		1940.36	1879.27	1613.27	1970.65	1819.55	1965.47
ENSG00000067836	ROGDI	79641	16	536.249	538.998	-0.00380062	0.0860392	-0.0441732	0.964766	1		569.18	553.96	485.6	516.98	535.45	564.56
ENSG00000067840	PDZD4	57595	X	0	0.327	-0.475422	0.815307	-0.58312	0.559812	0.736668		0	0	0	0	0.98	0
ENSG00000067842	ATP2B3	492	X	0	0	0	1.03779	0	1			0	0	0	0	0	0
ENSG00000067900	ROCK1	6093	18	1643.64	1374.46	0.25548	0.0815652	3.13222	0.00173488	0.00706028		1505.72	1478.02	1947.18	1355.46	1460.95	1306.98
ENSG00000067955	CBFB	865	16	1425.56	1113.5	0.353918	0.0584424	6.05583	1.39691e-09	1.75809e-08		1376.47	1389.97	1510.23	1164.6	1137.71	1038.19
ENSG00000067992	PDK3	5165	X	2543.49	1446.8	0.810363	0.12298	6.58937	4.41689e-11	6.81603e-10		2139.15	2163.65	3327.66	1351.75	1583.76	1404.9
ENSG00000068001	HYAL2	8692	3	2303.61	2391.45	-0.0532088	0.0505728	-1.05212	0.292743	0.475943		2326.61	2341.3	2242.93	2329.2	2408.06	2437.1
ENSG00000068024	HDAC4	9759	2	591.822	485.292	0.281918	0.0672205	4.19393	2.7416e-05	0.000171972		570.69	561.76	643.02	470.66	528.57	456.64
ENSG00000068028	RASSF1	11186	3	944.661	982.075	-0.0556653	0.0694164	-0.801904	0.422608	0.610347		966.78	942.75	924.46	1020.99	953.99	971.24
ENSG00000068078	FGFR3	2261	4	88.549	89.633	-0.0179532	0.157141	-0.114249	0.90904	0.974139		82.39	97.39	85.86	93.58	90.39	84.93
ENSG00000068079	IFI35	3430	17	1042.24	3316.06	-1.6688	0.0609271	-27.3901	3.59738e-165	3.97088e-162		1012.13	1060.4	1054.2	3300.16	3330.61	3317.41
ENSG00000068097	HEATR6	63897	17	1157.81	1344.88	-0.216183	0.053496	-4.04111	5.31992e-05	0.000314816		1204.12	1114.94	1154.38	1415.68	1290	1328.96
ENSG00000068120	COASY	80347	17	4450.84	4025.27	0.145764	0.039923	3.65112	0.000261095	0.00132025		4542.11	4556.37	4254.02	3993.18	4050.76	4031.86
ENSG00000068137	PLEKHH3	79990	17	1129.94	1030.71	0.133724	0.0693547	1.92812	0.0538399	0.129477		1188.25	1123.51	1078.06	1004.32	1087.61	1000.22
ENSG00000068305	MEF2A	4205	15	1339.07	1157.5	0.209009	0.0734302	2.84637	0.00442214	0.0159518		1347.74	1274.66	1394.79	1198.88	1149.5	1124.12
ENSG00000068308	OTUD5	55593	X	2694.43	2702.01	-0.00359786	0.0493172	-0.0729534	0.941843	0.993574		2732.52	2700.48	2650.3	2655.32	2700.84	2749.86
ENSG00000068323	TFE3	7030	X	2380.6	2417.04	-0.0205988	0.0425593	-0.484002	0.628385	0.788451		2452.84	2414.53	2274.41	2426.48	2381.53	2443.1
ENSG00000068354	TBC1D25	4943	X	822.244	848.349	-0.0430829	0.0714996	-0.602561	0.546801	0.726886		835.25	845.36	786.12	782.89	906.83	855.33
ENSG00000068366	ACSL4	2182	X	2302.02	2053.43	0.163886	0.0705919	2.3216	0.0202546	0.0579115		2171.66	2267.28	2467.12	2019.75	2184.05	1956.48
ENSG00000068383	INPP5A	3632	10	622.83	554.323	0.168219	0.0665623	2.52725	0.0114961	0.0360623		607.73	631.1	629.66	519.76	580.65	562.56
ENSG00000068394	GPKOW	27238	X	1067.28	1067.94	-0.000211129	0.0545925	-0.00386735	0.996914	1		1021.96	1126.63	1053.25	1042.3	1043.39	1118.13
ENSG00000068400	GRIPAP1	56850	X	2337.2	2814.64	-0.267251	0.055167	-4.8444	1.26994e-06	1.02717e-05		2435.46	2347.53	2228.62	2905.48	2652.7	2885.75
ENSG00000068438	FTSJ1	24140	X	2328.06	2368.61	-0.0228015	0.0484096	-0.471012	0.637632	0.795081		2404.47	2476.09	2103.64	2386.64	2354.02	2365.16
ENSG00000068489	PRR11	55771	17	5499.59	2747.9	0.99903	0.0678817	14.7172	4.99753e-49	6.69847e-47		4932.9	5129.03	6436.85	2767.43	2782.38	2693.9
ENSG00000068615	REEP1	65055	2	0	0	0	0.934096	0	1	1		0	0	0	0	0	0
ENSG00000068650	ATP11A	23250	13	2117.55	1876.34	0.172926	0.0955486	1.80982	0.0703236	0.160809		1941.11	1865.24	2546.31	1734.39	2189.95	1704.67
ENSG00000068654	POLR1A	25885	2	3584.91	3379.32	0.0842492	0.095595	0.881314	0.378148	0.568267		3291.88	3113.42	4349.43	3289.97	3498.61	3349.39
ENSG00000068697	LAPTM4A	9741	2	4414.5	4117.71	0.0993565	0.0551014	1.80316	0.0713633	0.162852		4033.4	4339.77	4870.33	4068.22	4201.08	4083.82
ENSG00000068724	TTC7A	57217	2	2358.74	2577.98	-0.127803	0.0440616	-2.90055	0.00372507	0.0137629		2375.74	2363.11	2337.38	2507.09	2759.79	2467.08
ENSG00000068745	IP6K2	51447	3	2404.47	2536.57	-0.0753547	0.049557	-1.52057	0.128369	0.259518		2554.89	2448.04	2210.49	2548.78	2470.94	2589.98
ENSG00000068781	STON1-GTF2A1L	286749	2	2.229	0.969	0.63921	0.968272	0.660155	0.509154			2.27	1.56	2.86	0.93	0.98	1
ENSG00000068784	SRBD1	55133	2	1010.82	872.477	0.211401	0.0638612	3.31032	0.000931896	0.0040658		966.02	1037.03	1029.4	883.87	826.27	907.29
ENSG00000068796	KIF2A	3796	5	2496.74	2339.14	0.0930353	0.0661084	1.40732	0.159334	0.306342		2383.3	2409.86	2697.05	2343.1	2348.13	2326.19
ENSG00000068831	RASGRP2	10235	11	2.505	1.933	0.221377	0.657266	0.336815	0.736257	0.870455		0.76	3.9	2.86	1.85	2.95	1
ENSG00000068878	PSME4	23198	2	3905.69	3818.81	0.0315909	0.0559628	0.564498	0.572415	0.744695		3741.63	3707.12	4268.33	3726.35	3805.14	3924.94
ENSG00000068885	IFT80	57560	3	413.875	284.033	0.541401	0.0896053	6.04206	1.52155e-09	1.90346e-08		409.69	412.16	419.77	284.43	286.88	280.78
ENSG00000068903	SIRT2	22933	19	724.98	768.521	-0.0815754	0.0650457	-1.25413	0.209796	0.375473		743.79	743.29	687.86	750.46	743.74	811.37
ENSG00000068912	ERLEC1	27248	2	2707.36	2605.94	0.0541708	0.0485684	1.11535	0.264699	0.442623		2596.46	2703.59	2822.02	2604.37	2608.48	2604.97
ENSG00000068971	PPP2R5B	5526	11	728.997	1054.07	-0.52975	0.0617417	-8.5801	9.47873e-18	2.74065e-16		732.45	758.1	696.44	1048.79	1051.25	1062.17
ENSG00000068976	PYGM	5837	11	31.418	40.646	-0.358805	0.293144	-1.22399	0.220957	0.389796		33.26	34.28	26.71	42.62	36.35	42.97
ENSG00000068985	PAGE1	8712	X	0.578	0.975	-0.475997	0.952291	-0.499844	0.617185			0	0.78	0.95	0.93	0	2
ENSG00000069011	PITX1	5307	5	1186.75	1533.24	-0.367989	0.0734489	-5.01014	5.43914e-07	4.64468e-06		1226.04	1208.44	1125.76	1487.95	1571.97	1539.8
ENSG00000069018	TRPC7	57113	5	0	0							0	0	0	0	0	0
ENSG00000069020	MAST4	375449	5	586.492	790.128	-0.431393	0.134278	-3.21268	0.00131504	0.00552546		510.98	507.22	741.28	788.44	869.49	712.44
ENSG00000069122	ADGRF5	221395	6	245.384	42.509	2.52694	0.257434	9.81586	9.62152e-23	3.92495e-21		260.02	246.21	229.92	33.35	44.21	49.96
ENSG00000069188	SDK2	54549	17	2.408	1.587	0.385222	0.64161	0.600399	0.54824	0.728025		4.54	0.78	1.91	2.78	0.98	1
ENSG00000069206	ADAM7	8756	8	0	0.309	-0.128891	0.648688	-0.198695	0.842502			0	0	0	0.93	0	0
ENSG00000069248	NUP133	55746	1	1871.7	1630.04	0.197852	0.0530757	3.72774	0.000193205	0.00100792		1781.62	1869.14	1964.35	1667.68	1585.72	1636.72
ENSG00000069275	NUCKS1	64710	1	13862.2	10452.7	0.40653	0.0702045	5.79066	7.011e-09	8.05642e-08		12395	13327.1	15864.6	10540.7	10748.3	10069.1
ENSG00000069329	VPS35	55737	16	5778.55	5517.32	0.0661841	0.0557608	1.18693	0.235256	0.407851		5521.73	5660.4	6153.5	5614.54	5455.71	5481.73
ENSG00000069345	DNAJA2	10294	16	3597.01	3736.09	-0.0554592	0.0419924	-1.3207	0.186602	0.34434		3434.74	3613.62	3742.66	3685.58	3721.63	3801.04
ENSG00000069399	BCL3	602	19	2192.09	2553.05	-0.218756	0.0777703	-2.81284	0.00491059	0.017429		2277.48	2303.9	1994.88	2488.56	2718.52	2452.09
ENSG00000069424	KCNAB2	8514	1	834.731	853.058	-0.0281548	0.0798325	-0.352673	0.724333	0.862444		901.01	860.94	742.24	794.93	901.92	862.33
ENSG00000069431	ABCC9	10060	12	5.052	30.404	-2.50965	0.469088	-5.35006	8.79258e-08	8.5004e-07		3.02	5.45	6.68	42.62	21.61	26.98
ENSG00000069482	GAL	51083	11	0	0	0	0.869898	0	1	1		0	0	0	0	0	0
ENSG00000069493	CLEC2D	29121	12	109.553	85.477	0.355514	0.195075	1.82244	0.0683876	0.157209		111.87	113.75	103.04	102.84	75.65	77.94
ENSG00000069509	FUNDC1	139341	X	1039.68	850.558	0.289548	0.0787733	3.67571	0.000237189	0.00120914		1062.02	1006.64	1050.39	814.39	841.99	895.3
ENSG00000069535	MAOB	4129	X	60.747	62.876	-0.0461951	0.35399	-0.130498	0.896172	0.966531		56.69	65.45	60.1	68.56	49.12	70.94
ENSG00000069667	RORA	6095	15	12.612	11.936	0.0670666	0.339249	0.197691	0.843287	0.935917		9.07	16.36	12.4	12.04	12.77	10.99
ENSG00000069696	DRD4	1815	11	2.357	2.908	-0.221979	0.631179	-0.35169	0.725071	0.862736		3.78	2.34	0.95	2.78	2.95	3
ENSG00000069702	TGFBR3	7049	1	43.55	47.746	-0.144031	0.168452	-0.855023	0.392539	0.581143		44.6	37.4	48.66	47.25	55.02	40.97
ENSG00000069764	PLA2G10	8399	16	16.834	9.101	0.859109	0.602826	1.42514	0.154118			11.34	21.04	18.13	6.49	9.82	10.99
ENSG00000069812	HES2	54626	1	12.274	11.246	0.133684	0.359497	0.371863	0.709995	0.851372		13.61	15.58	7.63	12.97	12.77	7.99
ENSG00000069849	ATP1B3	483	3	2629.18	2554.12	0.0420126	0.0501016	0.83855	0.401722	0.590453		2591.17	2670.87	2625.49	2456.13	2563.29	2642.94
ENSG00000069869	NEDD4	4734	15	822.567	805.521	0.0277351	0.0671364	0.413116	0.679522	0.828002		815.6	761.99	890.11	776.4	853.77	786.39
ENSG00000069943	PIGB	9488	15	422.879	410.227	0.0401886	0.0793404	0.506534	0.612482	0.776359		396.84	430.08	441.72	437.3	410.68	382.7
ENSG00000069956	MAPK6	5597	15	4228.43	4236.88	-0.00367525	0.0537345	-0.0683965	0.94547	0.995596		3996.36	4158.23	4530.69	4244.26	4398.56	4067.83
ENSG00000069966	GNB5	10681	15	1268.32	1152.89	0.137402	0.0504123	2.72556	0.00641927	0.0220255		1232.85	1300.37	1271.72	1133.1	1208.45	1117.13
ENSG00000069974	RAB27A	5873	15	1209.54	1098.01	0.139035	0.061749	2.25162	0.0243461	0.067632		1170.11	1241.16	1217.34	1111.79	1117.08	1065.17
ENSG00000069998	HDHD5	27440	22	1475.44	1613.76	-0.127556	0.0593868	-2.14789	0.0317224	0.0844475		1485.31	1548.14	1392.89	1544.46	1620.11	1676.69
ENSG00000070010	UFD1	7353	22	1661.22	1504.72	0.144002	0.0449375	3.20449	0.00135304	0.00566104		1682.6	1678.25	1622.81	1465.71	1475.68	1572.77
ENSG00000070018	LRP6	4040	12	1262.88	1038.77	0.27931	0.0850188	3.28528	0.00101882	0.00440612		1204.12	1142.99	1441.54	1029.33	1137.71	949.26
ENSG00000070019	GUCY2C	2984	12	0.519	1.26	-0.704882	1.03982	-0.677891	0.497841			0	1.56	0	2.78	0	1
ENSG00000070031	SCT	6343	11	2.222	3.52	-0.526555	0.970542	-0.542537	0.587449			3.02	0.78	2.86	4.63	3.93	2
ENSG00000070047	PHRF1	57661	11	2477.05	2740.98	-0.146718	0.044389	-3.30527	0.000948835	0.00412915		2418.07	2441.02	2572.07	2645.13	2805.96	2771.84
ENSG00000070061	ELP1	8518	9	3374.9	3258.68	0.0495326	0.0440832	1.12362	0.261176	0.438769		3365.95	3215.48	3543.27	3316.84	3211.73	3247.47
ENSG00000070081	NUCB2	4925	11	422.928	378.888	0.152971	0.0697753	2.19234	0.028355	0.0769127		390.04	424.63	454.12	378.01	395.94	362.72
ENSG00000070087	PFN2	5217	3	9735.91	7716.4	0.335005	0.0432634	7.74338	9.68096e-15	2.17561e-13		9431.17	9722.02	10054.5	7675.06	7904.05	7570.1
ENSG00000070159	PTPN3	5774	9	2062.84	1755.73	0.231509	0.0540951	4.27967	1.87169e-05	0.000121405		2023.5	2032.76	2132.26	1783.5	1794.01	1689.68
ENSG00000070182	SPTB	6710	14	4122.07	1187.6	1.79178	0.10267	17.4518	3.3327e-68	8.12184e-66		3904.9	4084.22	4377.09	1034.89	1413.79	1114.13
ENSG00000070190	DAPP1	27071	4	766.449	1362.64	-0.829961	0.0943868	-8.79319	1.45372e-18	4.50149e-17		743.79	771.34	784.21	1487.02	1294.91	1305.98
ENSG00000070193	FGF10	2255	5	0	0							0	0	0	0	0	0
ENSG00000070214	SLC44A1	23446	9	5322.21	4898.88	0.118922	0.0556741	2.13604	0.0326763	0.0864914		5029.65	5231.88	5705.11	4888.17	5036.19	4772.28
ENSG00000070269	TMEM260	54916	14	276.295	245.275	0.169158	0.0953303	1.77444	0.0759903	0.17141		271.36	270.36	287.16	249.23	235.8	250.8
ENSG00000070366	SMG6	23293	17	893.376	946.048	-0.0872209	0.0738807	-1.18056	0.237776	0.410928		816.36	830.56	1033.22	1005.24	977.57	855.33
ENSG00000070367	EXOC5	10640	14	2564.29	2273.02	0.172762	0.0737673	2.34198	0.0191815	0.0553245		2399.93	2503.36	2789.59	2351.44	2339.28	2128.34
ENSG00000070371	CLTCL1	8218	22	10.316	6.816	0.552437	0.36286	1.52245	0.127896	0.258756		15.87	9.35	5.72	5.56	5.89	8.99
ENSG00000070388	FGF22	27006	19	2.163	3.513	-0.59413	0.704192	-0.843704	0.398835			3.02	1.56	1.91	5.56	0.98	4
ENSG00000070404	FSTL3	10272	19	428.946	927.395	-1.10685	0.0848127	-13.0505	6.31241e-39	5.83509e-37		477.72	416.06	393.06	947.8	949.08	885.31
ENSG00000070413	DGCR2	9993	22	3295.05	3196.41	0.0436191	0.0430391	1.01348	0.310833	0.496092		3245.77	3322.22	3317.17	3217.7	3196.01	3175.52
ENSG00000070423	RNF126	55658	19	1628.42	1710.76	-0.0690555	0.0766587	-0.900817	0.367686	0.556824		1747.6	1721.88	1415.78	1586.15	1766.5	1779.61
ENSG00000070444	MNT	4335	17	1045.99	1128.92	-0.108174	0.0732803	-1.47617	0.139898	0.277651		1095.28	1070.53	972.16	1080.29	1215.33	1091.15
ENSG00000070476	ZXDC	79364	3	647.548	756.51	-0.22366	0.0692047	-3.23186	0.00122987	0.00522965		660.64	634.21	647.79	742.12	727.04	800.38
ENSG00000070495	JMJD6	23210	17	2450.01	2608.25	-0.0896381	0.0452678	-1.98017	0.0476841	0.117352		2492.15	2465.18	2392.71	2629.38	2497.46	2697.9
ENSG00000070501	POLB	5423	8	742.827	666.59	0.154609	0.0766274	2.01768	0.0436246	0.109076		710.53	751.86	766.09	698.57	632.72	668.48
ENSG00000070526	ST6GALNAC1	55808	17	359.771	145.984	1.29773	0.18749	6.92159	4.46611e-12	7.68162e-11		362.07	383.33	333.91	125.08	168.99	143.89
ENSG00000070540	WIPI1	55062	17	417.379	405.238	0.0417297	0.0867906	0.480809	0.630652	0.789893		414.22	415.28	422.64	411.36	411.66	392.69
ENSG00000070601	FRMPD1	22844	9	1.392	0.655	0.672039	0.978118	0.687074	0.492036			2.27	0	1.91	0	1.96	0
ENSG00000070610	GBA2	57704	9	2592.58	3304.01	-0.348193	0.0959976	-3.6271	0.000286618	0.00143309		2898.82	2719.95	2158.97	3266.81	3319.8	3325.41
ENSG00000070614	NDST1	3340	5	2308.24	2494.44	-0.112293	0.0529429	-2.12103	0.0339196	0.0891457		2339.46	2204.95	2380.31	2452.42	2531.85	2499.05
ENSG00000070669	ASNS	440	7	44.263	56.902	-0.359344	0.239583	-1.49987	0.133647	0.267908		42.33	47.53	42.93	66.71	54.04	49.96
ENSG00000070718	AP3M2	10947	8	1112.8	1321.92	-0.246874	0.0598148	-4.1273	3.67048e-05	0.000223916		1158.01	1132.86	1047.53	1399	1245.78	1320.97
ENSG00000070729	CNGB1	1258	16	13.995	9.45	0.566986	0.446234	1.2706	0.203871	0.367566		17.39	17.92	6.68	6.49	6.88	14.99
ENSG00000070731	ST6GALNAC2	10610	17	71.835	45.541	0.657498	0.22794	2.88452	0.00392009	0.014387		73.32	76.36	65.83	45.4	41.26	49.96
ENSG00000070748	CHAT	1103	10	0	0							0	0	0	0	0	0
ENSG00000070756	PABPC1	26986	8	40779.2	28381.8	0.522789	0.0215316	24.2801	3.18198e-130	1.75617e-127		40472.3	40818	41047.2	28267.2	27938.8	28939.4
ENSG00000070759	TESK2	10420	1	191.613	195.197	-0.0253031	0.162176	-0.156022	0.876016	0.954613		188.22	198.68	187.94	187.15	190.6	207.84
ENSG00000070761	CFAP20	29105	16	1547.41	1376.24	0.16867	0.0592957	2.84455	0.0044474	0.0160275		1461.12	1626.05	1555.07	1396.22	1312.59	1419.89
ENSG00000070770	CSNK2A2	1459	16	2845.25	2751.04	0.0471521	0.0399079	1.18152	0.237395	0.410534		2823.98	2728.52	2983.26	2795.22	2689.05	2768.84
ENSG00000070778	PTPN21	11099	14	120.129	131.969	-0.140521	0.119157	-1.1793	0.238279	0.411457		129.26	96.61	134.52	116.74	153.27	125.9
ENSG00000070785	EIF2B3	8891	1	1001.74	998.222	0.00609818	0.0656787	0.0928487	0.926024	0.984992		986.43	1049.49	969.3	996.9	919.6	1078.16
ENSG00000070808	CAMK2A	815	5	0.504	0.642	-0.187504	0.870775	-0.21533	0.82951	0.927441		1.51	0	0	0.93	0	1
ENSG00000070814	TCOF1	6949	5	9517.3	9839.26	-0.0481898	0.0416302	-1.15757	0.247041	0.422389		9370.7	9420.5	9760.69	9906.05	9791.39	9820.35
ENSG00000070831	CDC42	998	1	7629.63	6297.64	0.276208	0.050601	5.45855	4.80042e-08	4.8404e-07		7285.97	7425.92	8177	6245.48	6198.47	6448.97
ENSG00000070882	OSBPL3	26031	7	2018.52	2334.03	-0.209312	0.0662453	-3.15965	0.00157959	0.00649738		2056.76	2012.5	1986.29	2474.66	2230.23	2297.21
ENSG00000070886	EPHA8	2046	1	0.26	1.308	-0.724635	0.933876	-0.775944	0.437782			0	0.78	0	0.93	0	3
ENSG00000070915	SLC12A3	6559	16	0	0.309	-0.608828	0.974893	-0.624508	0.532294	0.714076		0	0	0	0.93	0	0
ENSG00000070950	RAD18	56852	3	981.456	919.922	0.0911471	0.0645369	1.41233	0.157854	0.304246		891.19	1023.78	1029.4	954.29	886.2	919.28
ENSG00000070961	ATP2B1	490	12	5021.88	3926.59	0.353815	0.0595206	5.94441	2.77451e-09	3.35678e-08		4742.42	4655.32	5667.9	3806.95	4103.82	3868.98
ENSG00000070985	TRPM5	29850	11	0	0.333	-0.128891	0.648688	-0.198695	0.842502			0	0	0	0	0	1
ENSG00000071051	NCK2	8440	2	41.122	27.207	0.584474	0.199311	2.93247	0.00336276	0.0125651		41.57	43.63	38.16	22.24	33.4	25.98
ENSG00000071054	MAP4K4	9448	2	9226.11	9283.76	-0.00948499	0.0518061	-0.183087	0.85473	0.942141		8930.77	8610.98	10136.6	9403.89	9160.64	9286.76
ENSG00000071073	MGAT4A	11320	2	98.3	60.238	0.683563	0.163399	4.18341	2.87169e-05	0.000179624		87.68	84.15	123.07	66.71	53.05	60.95
ENSG00000071082	RPL31	6160	2	15327.6	12689.9	0.272254	0.0646199	4.21317	2.51814e-05	0.000159423		15398.9	15450.2	15133.8	12107.4	12807.6	13154.8
ENSG00000071127	WDR1	9948	4	17183.8	14535.8	0.241423	0.0349516	6.90734	4.93809e-12	8.46241e-11		17127.6	17312.3	17111.5	14331.9	14823.7	14451.7
ENSG00000071189	SNX13	23161	7	1228.31	1018.18	0.268724	0.0603612	4.45193	8.51029e-06	5.89718e-05		1201.1	1200.64	1283.17	1051.57	1023.74	979.24
ENSG00000071203	MS4A12	54860	11	0	0							0	0	0	0	0	0
ENSG00000071205	ARHGAP10	79658	4	602.9	676.508	-0.166706	0.0696633	-2.39302	0.0167102	0.0495055		603.2	588.25	617.26	663.37	690.68	675.47
ENSG00000071242	RPS6KA2	6196	6	888.628	735.374	0.271949	0.122742	2.21561	0.0267181	0.0733311		830.72	868.73	966.43	742.12	812.51	651.49
ENSG00000071243	ING3	54556	7	506.772	472.996	0.0989653	0.107089	0.924142	0.355413	0.543944		492.84	522.8	504.68	504.94	424.43	489.62
ENSG00000071246	VASH1	22846	14	466.28	469.846	-0.00745732	0.104294	-0.0715027	0.942998	0.994109		487.55	504.88	406.42	439.16	519.73	450.65
ENSG00000071282	LMCD1	29995	3	722.609	610.323	0.243111	0.0585075	4.15521	3.24985e-05	0.000200801		737.74	709.79	720.29	633.72	575.73	621.52
ENSG00000071462	BUD23	114049	7	2084.96	2271.01	-0.121935	0.0426083	-2.86177	0.00421287	0.0153117		2149.73	2091.19	2013.96	2261.57	2168.33	2383.14
ENSG00000071537	SEL1L	6400	14	3406.19	2936.04	0.212919	0.0781792	2.72348	0.00645985	0.0221284		3098.37	3143.8	3976.4	2953.65	3105.62	2748.86
ENSG00000071539	TRIP13	9319	5	3291.14	3133.32	0.0709992	0.0564276	1.25823	0.208307	0.373413		3331.94	3320.67	3220.81	3242.72	2929.75	3227.48
ENSG00000071553	ATP6AP1	537	X	4009.99	4007.27	0.00160132	0.0414706	0.0386133	0.969199	1		4113.52	3995.4	3921.07	3901.46	4006.55	4113.79
ENSG00000071564	TCF3	6929	19	3459.28	2771.15	0.320163	0.0570361	5.61334	1.98463e-08	2.12809e-07		3440.79	3594.14	3342.92	2697.94	2939.58	2675.91
ENSG00000071575	TRIB2	28951	2	2495.62	1940.06	0.363914	0.0664088	5.4799	4.25577e-08	4.32375e-07		2589.66	2549.32	2347.87	1933.59	1957.1	1929.5
ENSG00000071626	DAZAP1	26528	19	6071.11	5725.19	0.0854735	0.0335483	2.54777	0.0108413	0.0343296		6146.85	6256.44	5810.05	5656.23	5728.84	5790.49
ENSG00000071655	MBD3	53615	19	1282.4	1172.03	0.130507	0.0630265	2.07067	0.0383896	0.0984942		1302.39	1281.67	1263.14	1119.2	1186.84	1210.06
ENSG00000071677	PRLH	51052	2	0.504	0	0.182729	0.648688	0.28169	0.778181			1.51	0	0	0	0	0
ENSG00000071794	HLTF	6596	3	3089.24	2382.1	0.373859	0.0568159	6.58019	4.69851e-11	7.23872e-10		2986.5	2984.08	3297.13	2372.74	2446.37	2327.19
ENSG00000071859	FAM50A	9130	X	2268.03	2517.5	-0.149271	0.0692408	-2.15583	0.0310973	0.0830427		2463.43	2261.82	2078.83	2457.98	2493.53	2600.97
ENSG00000071889	FAM3A	60343	X	1002.96	1003.48	-0.00019904	0.0707298	-0.0028141	0.997755	1		993.23	1054.95	960.71	1042.3	1015.88	952.26
ENSG00000071894	CPSF1	29894	8	6436.62	6783.34	-0.0750661	0.0701807	-1.06961	0.284794	0.466616		7062.98	6681.07	5565.82	6761.53	6973.64	6614.84
ENSG00000071909	MYO3B	140469	2	143.958	78.943	0.865087	0.250033	3.4599	0.000540383	0.00251933		155.71	134.01	142.15	85.24	75.65	75.94
ENSG00000071967	CYBRD1	79901	2	200.679	161.272	0.319781	0.0947491	3.37503	0.00073808	0.00330078		210.14	204.91	186.99	152.87	164.07	166.87
ENSG00000071991	CDH19	28513	18	0.318	0	0.394706	1.00751	0.391763	0.695233			0	0	0.95	0	0	0
ENSG00000071994	PDCD2	5134	6	2323	2606.11	-0.164916	0.0485675	-3.39561	0.000684757	0.00309999		2413.54	2316.36	2239.11	2628.46	2467.99	2721.88
ENSG00000072041	SLC6A15	55117	12	0	0	0	0.990455	0	1	1		0	0	0	0	0	0
ENSG00000072042	RDH11	51109	14	3474.88	3291.53	0.0773452	0.0383013	2.01939	0.043447	0.108748		3319.84	3548.17	3556.63	3343.71	3286.4	3244.47
ENSG00000072062	PRKACA	5566	19	2169.54	1642.83	0.401987	0.041318	9.7291	2.26581e-22	8.87638e-21		2220.79	2169.89	2117.95	1624.14	1704.6	1599.75
ENSG00000072071	ADGRL1	22859	19	2356.24	2563.3	-0.121182	0.0716216	-1.69197	0.0906508	0.197225		2334.17	2368.57	2366	2347.73	2795.16	2547.01
ENSG00000072080	SPP2	6694	2	0.252	0	0.0788557	0.648688	0.121562	0.903246			0.76	0	0	0	0	0
ENSG00000072110	ACTN1	87	14	10106.2	10110.8	-0.000777173	0.03662	-0.0212227	0.983068	1		10038.9	10098.4	10181.4	10217.4	10278.7	9836.33
ENSG00000072121	ZFYVE26	23503	14	1148.55	1356.67	-0.241518	0.0941336	-2.56569	0.0102971	0.0328278		1088.47	1016.77	1340.41	1255.4	1476.67	1337.96
ENSG00000072133	RPS6KA6	27330	X	302.285	235.165	0.359245	0.121827	2.9488	0.00319008	0.0119939		272.12	304.64	330.09	224.21	254.46	226.82
ENSG00000072134	EPN2	22905	17	2968.72	3419.51	-0.202718	0.0353847	-5.72898	1.01038e-08	1.14216e-07		3006.15	3050.31	2849.69	3443.77	3456.36	3358.38
ENSG00000072135	PTPN18	26469	2	1340.93	1376.23	-0.0364957	0.0545687	-0.668804	0.503621	0.688958		1379.49	1348.68	1294.62	1402.71	1343.05	1382.92
ENSG00000072163	LIMS2	55679	2	0.764	1.254	-0.395653	0.69185	-0.571877	0.567405	0.740891		1.51	0.78	0	2.78	0.98	0
ENSG00000072182	ASIC4	55515	2	4.327	2.86	0.505819	0.717638	0.704838	0.480911			6.05	3.12	3.82	4.63	2.95	1
ENSG00000072195	SPEG	10290	2	111.398	102.625	0.129304	0.17836	0.72496	0.468476	0.655211		133.04	123.88	77.28	89.87	107.09	110.91
ENSG00000072201	LNX1	84708	4	301.032	293.762	0.035461	0.132475	0.267681	0.788945	0.904483		285.72	313.99	303.38	289.99	307.52	283.78
ENSG00000072210	ALDH3A2	224	17	6113.44	4647.66	0.395858	0.0338188	11.7053	1.19782e-31	8.54644e-30		6201.27	6137.23	6001.81	4547.22	4744.4	4651.37
ENSG00000072274	TFRC	7037	3	18713.7	17265.8	0.115921	0.0521013	2.22491	0.0260869	0.0717984		17987	17920.8	20233.1	17018.7	17196.3	17582.3
ENSG00000072310	SREBF1	6720	17	12412.6	8889.77	0.481295	0.0645718	7.45365	9.07927e-14	1.87222e-12		12878	12777.8	11581.9	8668.25	9552.65	8448.41
ENSG00000072315	TRPC5	7224	X	0	0	0	0.648688	0	1			0	0	0	0	0	0
ENSG00000072364	AFF4	27125	5	3836.82	3919.15	-0.0310062	0.132649	-0.233746	0.815182	0.919834		3242.74	3331.57	4936.16	3657.79	4457.51	3642.16
[truncated: 59,482 more rows]
